# Supplementary material
Source: publisher figshare collection journal article supplement (https://karger.figshare.com/articles/dataset/_/4004913)
Supplement: Supplementary file 1 [file 1]

Archive with 7 entries (7 files):
- suppl.table.4.MNP_201511004_1_12.xlsx
- suppl.table.3.MNP_201511004_1_11.xlsx
- suppl.table.2.MNP_201511004_1_10.xlsx
- suppl.table.1.MNP_201511004_1_13.xlsx
- suppl.fig.2..eps
- suppl.fig.1.MNP_201511004_1_8.eps
- MNP_201511004_1.pdf
