# Supplementary material
Source: publisher figshare collection journal article supplement (https://karger.figshare.com/articles/dataset/_/4004913)
Supplement: Supplementary file 1 [file 1 › suppl.table.2.MNP_201511004_1_10.xlsx]

## Sheet: PrL-cytosolic fract.
Supplemental Table 1. Proteomic comparison between shocked and control mice
Group	14N shocked/15N reference				14N control/15N reference				14N shocked/14N control
Uniprot ID	log2ratio	lowerCI	upperCI	# of quantified peptides	log2ratio	lowerCI	upperCI	# of quantified peptides	log2ratio	lowerCI	upperCI	# of quantified peptides identified	p-value	adjusted p-value
CN37_MOUSE,Q3TYV5_MOUSE,	-2.8	-3	-2.6	73	-1.6	-1.8	-1.5	114	-1.2	-1.4	-1	187	8.7183e-43	9e-40
Q3UYM8_MOUSE,MYPR_MOUSE,	-0.7	-0.8	-0.5	131	0.1	-0.1	0.2	151	-0.7	-0.9	-0.5	282	4.1846e-25	2.16e-22
CLD11_MOUSE,	-0.8	-1	-0.6	72	-0.1	-0.3	0.1	80	-0.7	-0.9	-0.5	152	1.2615e-12	4.34e-10
SIRT2_MOUSE,	-2.2	-2.4	-1.9	31	-1.2	-1.4	-1	37	-1	-1.3	-0.7	68	7.5561e-12	1.95e-09
MOG_MOUSE,Q3UY21_MOUSE,Q80YU5_MOUSE,	-0.6	-0.9	-0.4	42	0.4	0.1	0.6	45	-1	-1.3	-0.6	87	6.8603e-11	1.42e-08
Q542T4_MOUSE,Q09J72_MOUSE,	-1	-1.3	-0.8	38	0	-0.3	0.3	48	-1.1	-1.4	-0.7	86	4.5562e-09	7.84e-07
BASP1_MOUSE,	-2.4	-2.7	-2.2	37	-1.8	-2	-1.6	41	-0.7	-1	-0.4	78	1.7806e-07	2.63e-05
S6A11_MOUSE,Q8BWA7_MOUSE,	-0.9	-1.2	-0.6	26	-1.8	-2.1	-1.5	23	0.9	0.5	1.3	49	6.3059e-07	8.13e-05
Q3T1F6_MOUSE,Q3ZB62_MOUSE,	-1.1	-1.3	-0.8	34	-0.4	-0.7	-0.2	39	-0.7	-1	-0.3	73	2.0707e-06	0.00023744
Q3ZB61_MOUSE,	-1.2	-1.4	-0.9	31	-0.5	-0.7	-0.3	39	-0.6	-1	-0.3	70	5.5743e-06	0.000575268
MAG_MOUSE,	-1.2	-1.5	-1	33	-0.6	-0.8	-0.4	43	-0.6	-0.9	-0.3	76	6.9215e-06	0.000649363
Q6ZQ49_MOUSE,Q3UHK5_MOUSE,AT1A2_MOUSE,	-0.6	-0.7	-0.5	416	-0.8	-0.9	-0.7	399	0.2	0.1	0.3	815	1.0578e-05	0.000793195
TBB4_MOUSE,	1.6	1.4	1.7	148	1.9	1.8	2.1	157	-0.3	-0.6	-0.1	305	1.096e-05	0.000793195
ADT1_MOUSE,Q8BVI9_MOUSE,	-1.4	-1.5	-1.2	275	-1.6	-1.7	-1.5	233	0.2	0.1	0.4	508	1.125e-05	0.000793195
ADT2_MOUSE,Q545A2_MOUSE,	-1.3	-1.5	-1.2	226	-1.6	-1.8	-1.5	174	0.3	0.1	0.5	400	1.1529e-05	0.000793195
Q3UYK6_MOUSE,EAA2_MOUSE,A2APL8_MOUSE,	-0.7	-0.8	-0.6	374	-0.9	-1	-0.8	328	0.2	0.1	0.3	702	2.4891e-05	0.00160547
CMC1_MOUSE,	-1.3	-1.4	-1.2	198	-1.5	-1.7	-1.4	200	0.2	0.1	0.4	398	7.4848e-05	0.00454371
PTPA_MOUSE,Q543N6_MOUSE,	3.5	2.7	4.3	7	6	5.4	6.7	5	-2.5	-3.5	-1.6	12	0.00011887	0.00677915
AT1A3_MOUSE,	-0.2	-0.3	-0.1	576	-0.3	-0.5	-0.2	553	0.1	0	0.3	1129	0.00012481	0.00677915
Q3TEY5_MOUSE,	-1.6	-1.7	-1.4	126	-1.8	-2	-1.7	129	0.3	0.1	0.5	255	0.00032449	0.0167437
TBA1C_MOUSE,Q52L87_MOUSE,	1.5	1.4	1.6	206	1.7	1.6	1.9	213	-0.2	-0.4	-0.1	419	0.00067231	0.0330392
TBB3_MOUSE,	1.8	1.6	2	117	2.2	2	2.3	123	-0.3	-0.6	-0.1	240	0.00078573	0.0368579
TBB5_MOUSE,	1.7	1.6	1.9	185	2	1.8	2.1	180	-0.3	-0.5	0	365	0.0008912	0.0391347
NFL_MOUSE,Q05DD2_MOUSE,	1.5	1	2.1	7	3.2	2.7	3.6	15	-1.6	-2.4	-0.9	22	0.00091011	0.0391347
GBB2_MOUSE,Q3U9V4_MOUSE,	-1.9	-2.1	-1.7	33	-1.5	-1.7	-1.2	30	-0.5	-0.8	-0.1	63	0.0013574	0.0560335
TBB2C_MOUSE,	1.7	1.6	1.9	182	2	1.8	2.2	178	-0.2	-0.5	0	360	0.0016988	0.0674293
MYO1D_MOUSE,	-1.6	-2.2	-1.1	9	-0.6	-1.1	-0.2	14	-1	-1.7	-0.3	23	0.0019489	0.0735411
B2RSN3_MOUSE,TBB2B_MOUSE,	1.8	1.7	2	186	2.1	1.9	2.2	181	-0.3	-0.4	0	367	0.0019953	0.0735411
TBB2A_MOUSE,	1.8	1.7	2	193	2.1	1.9	2.2	183	-0.2	-0.4	0	376	0.0024353	0.0866631
TBA4A_MOUSE,	1.6	1.5	1.7	164	1.8	1.7	2	173	-0.2	-0.4	0	337	0.0034062	0.117173
NDUS2_MOUSE,	-4.6	-4.8	-4.4	49	-4.2	-4.5	-4	37	-0.4	-0.7	-0.1	86	0.0039915	0.129982
JAM3_MOUSE,	-1	-1.5	-0.6	10	-0.3	-0.7	0.1	13	-0.8	-1.4	-0.2	23	0.004066	0.129982
MPCP_MOUSE,Q3THU8_MOUSE,	-1.3	-1.5	-1.2	133	-1.5	-1.7	-1.4	147	0.2	0	0.4	280	0.0041564	0.129982
4F2_MOUSE,	-0.5	-0.7	-0.3	65	-0.8	-1	-0.6	61	0.3	0	0.6	126	0.0043918	0.133304
GPDM_MOUSE,	-1.3	-1.5	-1.2	148	-1.5	-1.7	-1.4	167	0.2	0	0.4	315	0.0045984	0.135587
SYEP_MOUSE,B9EIU1_MOUSE,	2.4	1.1	3.5	4	5.1	4.2	5.9	6	-2.8	-4.3	-1.3	10	0.0058656	0.168147
Q7TMS6_MOUSE,GLTP_MOUSE,Q3U011_MOUSE,	2	1.4	2.8	5	3.4	2.7	4	4	-1.3	-2.2	-0.3	9	0.0060643	0.168186
Q7TMQ1_MOUSE,CXA1_MOUSE,Q544I7_MOUSE,	-0.5	-0.8	-0.3	43	-0.9	-1.2	-0.7	48	0.4	0.1	0.7	91	0.0061929	0.168186
Q9Z1R9_MOUSE,	5.6	5.1	6	12	6.2	5.9	6.5	20	-0.7	-1.2	-0.1	32	0.0068069	0.180121
C9K0Y3_MOUSE,GRIA1_MOUSE,	0.6	0.4	0.7	99	0.3	0.1	0.5	97	0.3	0	0.5	196	0.0073121	0.186024
GBB1_MOUSE,Q3TQ70_MOUSE,	-1.6	-1.8	-1.4	42	-1.2	-1.5	-1	33	-0.4	-0.7	0	75	0.0074607	0.186024
TSN2_MOUSE,Q9D1X8_MOUSE,Q8C0C9_MOUSE,	-0.5	-1.1	0	7	0.2	-0.1	0.5	21	-0.8	-1.4	-0.2	28	0.007596	0.186024
SFXN3_MOUSE,	-1.3	-1.6	-1.1	55	-1.7	-1.9	-1.4	45	0.3	0	0.6	100	0.007751	0.186024
SYT1_MOUSE,Q3TPT3_MOUSE,	0.2	0.1	0.4	147	0	-0.1	0.2	135	0.2	0	0.4	282	0.0081222	0.190503
ENPP6_MOUSE,	0.4	-0.3	1	7	1.4	0.9	2	7	-1.1	-2	-0.2	14	0.0086006	0.195925
Q5SX53_MOUSE,M2OM_MOUSE,	-1.3	-1.5	-1.1	74	-1.6	-1.8	-1.4	57	0.3	0	0.5	131	0.0087331	0.195925
ACON_MOUSE,	-5.2	-5.4	-5	54	-4.9	-5.1	-4.7	56	-0.3	-0.6	0	110	0.0089579	0.196693
Q8C7W8_MOUSE,EAA1_MOUSE,Q543U3_MOUSE,Q8C3T7_MOUSE,	-1	-1.2	-0.9	109	-1.3	-1.4	-1.1	88	0.2	0	0.5	197	0.0093192	0.200363
Q3UQ73_MOUSE,	-5.5	-5.7	-5.2	64	-5.1	-5.4	-4.9	69	-0.3	-0.7	0	133	0.0099567	0.2097
NDUAA_MOUSE,	-4.8	-5.1	-4.5	25	-4.4	-4.6	-4.1	21	-0.4	-0.8	-0.1	46	0.010213	0.210796
ARF3_MOUSE,ARF1_MOUSE,Q3U344_MOUSE,	1.6	1.2	1.9	18	2.1	1.7	2.4	21	-0.5	-1	-0.1	39	0.010641	0.215324
SCAI_MOUSE,	6.4	5.6	7	5	4.2	3.1	5.3	4	2.1	0.8	3.4	9	0.011211	0.222495
Q3U2F9_MOUSE,Q3THF3_MOUSE,GBB4_MOUSE,	-1.9	-2.3	-1.5	10	-1.3	-1.7	-0.9	15	-0.6	-1.2	-0.1	25	0.011675	0.227332
Q3TZK4_MOUSE,	-1.5	-1.8	-1.3	48	-1.8	-2.1	-1.6	43	0.3	0	0.6	91	0.014313	0.268394
Q499F4_MOUSE,MAON_MOUSE,	-6.5	-7	-5.4	6	-5	-5.6	-4.5	8	-1.4	-2.2	-0.2	14	0.01454	0.268394
STML2_MOUSE,A2AG40_MOUSE,	-3	-3.4	-2.6	10	-3.6	-4.1	-3.2	7	0.7	0.1	1.2	17	0.014564	0.268394
NMDZ1_MOUSE,A2AI21_MOUSE,	0	-0.2	0.2	61	-0.3	-0.5	-0.1	68	0.3	0	0.6	129	0.015216	0.27549
GDAP1_MOUSE,Q3UEX4_MOUSE,	-1.1	-1.3	-0.8	37	-1.4	-1.7	-1.2	29	0.3	0	0.7	66	0.016909	0.300864
A4GZ26_MOUSE,	0.2	0	0.5	56	-0.1	-0.3	0.2	54	0.3	0	0.6	110	0.01789	0.312923
STXB1_MOUSE,	2.3	2.1	2.5	97	2.6	2.4	2.8	97	-0.2	-0.5	0	194	0.019727	0.339304
IQEC2_MOUSE,	0.2	0	0.5	52	-0.1	-0.3	0.1	53	0.3	0	0.6	105	0.020461	0.34091
HS74L_MOUSE,	2.6	2	3.3	10	3.7	3	4.3	16	-1.1	-2	-0.1	26	0.020481	0.34091
Q91V78_MOUSE,Q3UWG5_MOUSE,	-0.7	-1	-0.5	29	-0.4	-0.6	-0.1	27	-0.4	-0.8	0	56	0.021647	0.35288
VDAC1_MOUSE,	-1.3	-1.5	-1.1	109	-1.5	-1.7	-1.3	92	0.2	0	0.4	201	0.021884	0.35288
Q4LG64_MOUSE,	0.3	0.1	0.4	134	0.1	-0.1	0.2	128	0.2	0	0.4	262	0.023389	0.36833
Q9QZ83_MOUSE,	2.8	2.6	3	99	3	2.8	3.2	101	-0.3	-0.5	0	200	0.023556	0.36833
PP2BB_MOUSE,	1.5	1.2	1.9	24	2	1.7	2.3	23	-0.4	-0.9	0	47	0.025951	0.394344
2AAA_MOUSE,Q8C2E1_MOUSE,	2.1	1.9	2.3	43	2.4	2.2	2.6	48	-0.3	-0.6	0	91	0.026128	0.394344
NFM_MOUSE,	1.8	1	2.6	4	2.9	2.4	3.5	10	-1.1	-2.1	-0.1	14	0.026366	0.394344
Q5EBQ0_MOUSE,	-1.2	-1.4	-1	62	-1.4	-1.7	-1.2	45	0.3	0	0.5	107	0.02809	0.409907
Q7TMF4_MOUSE,PCCB_MOUSE,A0PJE6_MOUSE,Q9DBG2_MOUSE,	-5	-5.6	-4.4	9	-6.2	-7	-5.2	9	1.2	0.1	2.1	18	0.028201	0.409907
Q32P04_MOUSE,K2C5_MOUSE,	5.9	5.6	6.2	49	6.3	6	6.6	52	-0.4	-0.7	0	101	0.028957	0.41505
PHB2_MOUSE,Q3V235_MOUSE,	-1.6	-1.8	-1.4	54	-1.8	-2.1	-1.6	38	0.3	0	0.6	92	0.029739	0.418811
AT1B2_MOUSE,Q3UR55_MOUSE,	-0.9	-1.1	-0.6	42	-1.2	-1.4	-0.9	37	0.3	0	0.6	79	0.030031	0.418811
Q3TV75_MOUSE,Q3TIC8_MOUSE,QCR1_MOUSE,	-1.5	-1.7	-1.3	77	-1.7	-1.9	-1.5	75	0.2	0	0.5	152	0.031341	0.431252
CISY_MOUSE,	-5.2	-5.5	-4.8	18	-4.7	-5.1	-4.3	13	-0.5	-1	0	31	0.034392	0.467007
TTYH1_MOUSE,	-0.7	-1.1	-0.4	17	-1.2	-1.6	-0.8	13	0.5	0	1	30	0.035207	0.46743
GBRA5_MOUSE,	0.5	-0.2	1.3	6	-0.4	-1.1	0.2	5	1	0	2	11	0.035329	0.46743
Q69ZX9_MOUSE,	-3.5	-3.9	-3.2	16	-3.1	-3.4	-2.8	18	-0.4	-0.8	0	34	0.04133	0.523503
S12A5_MOUSE,	0.5	0.3	0.7	71	0.3	0.1	0.5	66	0.2	0	0.5	137	0.042083	0.523503
DLG4_MOUSE,	-0.4	-0.6	-0.3	95	-0.6	-0.8	-0.5	97	0.2	0	0.4	192	0.042091	0.523503
VATA_MOUSE,	3.1	2.8	3.4	32	2.8	2.4	3.1	30	0.4	0	0.8	62	0.042879	0.523503
ETFD_MOUSE,	-1.9	-2.3	-1.6	17	-2.4	-2.7	-2	14	0.4	0	0.9	31	0.042936	0.523503
Q497P1_MOUSE,STX1A_MOUSE,Q5D0A4_MOUSE,	-0.2	-0.4	0	48	0.1	-0.2	0.3	50	-0.3	-0.6	0	98	0.042936	0.523503
B1AWX7_MOUSE,AL1B1_MOUSE,	-5.5	-6.4	-4.7	3	-4.5	-5.2	-3.9	4	-1	-2.1	0	7	0.043118	0.523503
KCRB_MOUSE,	-1.2	-1.6	-0.8	15	-0.7	-1.1	-0.3	20	-0.5	-1.1	0	35	0.044322	0.531864
B0QZW1_MOUSE,	-0.1	-0.4	0.1	60	-0.4	-0.6	-0.2	56	0.3	0	0.6	116	0.045965	0.54524
Q6ZQ74_MOUSE,DAAM1_MOUSE,Q6DFY0_MOUSE,	-0.8	-1.6	0	5	0.4	-0.6	1.5	3	-1.2	-2.6	0	8	0.046494	0.545248
ATP5H_MOUSE,	-1.5	-1.7	-1.2	45	-1.7	-1.9	-1.5	40	0.2	0	0.5	85	0.049091	0.569235
Q91ZE6_MOUSE,Q8VIE5_MOUSE,	1.3	0.7	2.1	6	2.3	1.5	3.5	5	-1	-2.4	0.1	11	0.054554	0.619722
SEPT3_MOUSE,	3.3	2.8	3.8	8	4	3.4	4.6	9	-0.7	-1.4	0.1	17	0.054646	0.619722
Q05CJ5_MOUSE,Q3TC38_MOUSE,Q3TDJ2_MOUSE,	0.8	0.6	1	82	0.6	0.4	0.8	80	0.2	-0.1	0.4	162	0.055281	0.620109
TCPE_MOUSE,	0	-0.9	1.1	4	1.3	0.5	2	4	-1.2	-2.4	0.1	8	0.05789	0.642392
Q3TWH2_MOUSE,Q922E1_MOUSE,Q8C1W8_MOUSE,NNTM_MOUSE,	-0.8	-1	-0.5	39	-1.1	-1.4	-0.8	32	0.3	-0.1	0.6	71	0.059088	0.648711
GHC1_MOUSE,	-1.9	-2.1	-1.6	50	-2.1	-2.3	-1.9	52	0.2	-0.1	0.5	102	0.060227	0.652848
LETM1_MOUSE,	-1.3	-1.6	-1.1	53	-1.6	-1.8	-1.3	50	0.2	-0.1	0.5	103	0.06073	0.652848
Q3TQP7_MOUSE,THIL_MOUSE,	-5.4	-5.8	-5.1	21	-5	-5.3	-4.8	23	-0.4	-0.8	0.1	44	0.061478	0.654075
GHC2_MOUSE,	-2.1	-2.5	-1.8	21	-2.5	-2.9	-2.2	11	0.4	-0.1	0.9	32	0.062136	0.65433
C9K0Y5_MOUSE,	-0.2	-0.4	0	60	-0.4	-0.7	-0.2	55	0.2	-0.1	0.6	115	0.063937	0.663535
NMDE1_MOUSE,	0.2	-0.1	0.5	45	-0.1	-0.5	0.2	28	0.3	-0.1	0.7	73	0.064334	0.663535
Q5KU03_MOUSE,GSK3B_MOUSE,	1.7	0.8	2.7	3	3.1	2	4.2	7	-1.4	-2.8	0.2	10	0.064939	0.663535
Q3TD48_MOUSE,A2ARC5_MOUSE,S27A4_MOUSE,	-0.3	-1	0.7	9	0.8	0.1	1.5	11	-1	-2	0.1	20	0.066294	0.665199
Q3UV11_MOUSE,K2C6A_MOUSE,K2C6B_MOUSE,Q0VDR7_MOUSE,Q05B38_MOUSE,	6	5.7	6.4	24	6.4	6.1	6.7	26	-0.4	-0.8	0.1	50	0.066391	0.665199
Q8R0Y0_MOUSE,	-2.7	-3.3	-2.2	12	-2.2	-2.6	-1.8	13	-0.5	-1.2	0.1	25	0.067589	0.666554
B2RRX2_MOUSE,PP2BA_MOUSE,	1.6	1.3	1.8	40	1.9	1.6	2.1	40	-0.3	-0.6	0.1	80	0.067818	0.666554
CCG8_MOUSE,	0.7	0.5	1	45	0.4	0.2	0.7	38	0.3	-0.1	0.6	83	0.070449	0.67913
SV2A_MOUSE,	0.6	0.4	0.8	82	0.4	0.2	0.6	72	0.2	-0.1	0.4	154	0.071118	0.67913
KPCB_MOUSE,	2.1	1.8	2.5	24	2.6	2.2	2.9	28	-0.4	-0.9	0.1	52	0.072596	0.67913
PGM2L_MOUSE,	2.8	2.4	3.1	21	3.2	2.8	3.5	24	-0.4	-0.9	0.1	45	0.07301	0.67913
GFAP_MOUSE,	1	0.7	1.2	32	0.6	0.3	0.9	27	0.3	-0.1	0.8	59	0.073593	0.67913
Q80X68_MOUSE,Q9DAM4_MOUSE,	-5.3	-5.8	-4.7	6	-4.5	-5.2	-3.9	5	-0.7	-1.5	0.1	11	0.073681	0.67913
MDHM_MOUSE,	-5	-5.2	-4.8	44	-4.8	-5	-4.5	45	-0.2	-0.5	0.1	89	0.073704	0.67913
SFXN5_MOUSE,Q8BRQ9_MOUSE,	-1.4	-1.6	-1.2	44	-1.6	-1.9	-1.4	34	0.3	-0.1	0.6	78	0.074898	0.684024
OPALI_MOUSE,Q3USW3_MOUSE,	-1.3	-2	-0.5	3	-0.4	-1.1	0.3	4	-0.9	-1.9	0.2	7	0.079885	0.723169
Q80VZ2_MOUSE,	0.8	0.5	1	45	0.5	0.3	0.8	41	0.3	-0.1	0.6	86	0.08117	0.728413
Q8K314_MOUSE,	0.7	0.6	0.9	123	0.6	0.4	0.8	113	0.1	-0.1	0.4	236	0.083779	0.744632
C109A_MOUSE,	-1.1	-1.5	-0.8	21	-1.5	-1.8	-1.2	24	0.3	-0.1	0.7	45	0.084888	0.744632
E41L3_MOUSE,	2	1.7	2.3	35	2.4	2	2.7	30	-0.3	-0.8	0.1	65	0.085142	0.744632
EHD3_MOUSE,	3.2	2.6	4.1	13	2.2	1.7	3.2	16	0.9	-0.2	2	29	0.086799	0.747784
Q80T95_MOUSE,Q6ZWS6_MOUSE,	0.9	0.2	1.5	8	0.1	-0.5	0.8	10	0.7	-0.2	1.6	18	0.087768	0.747784
ARF5_MOUSE,	1.2	0.9	1.6	17	1.6	1.3	1.9	15	-0.4	-0.8	0.1	32	0.087998	0.747784
K2C73_MOUSE,	6	5.7	6.4	27	6.4	6.1	6.7	33	-0.3	-0.7	0.1	60	0.089211	0.747784
DHSA_MOUSE,	-5.5	-6	-5.1	25	-5.1	-5.5	-4.7	24	-0.4	-1	0.1	49	0.089656	0.747784
Q3TE45_MOUSE,Q0QEZ4_MOUSE,A2AA77_MOUSE,DHSB_MOUSE,	-4.4	-5.1	-3.8	6	-5.2	-5.8	-4.5	4	0.7	-0.2	1.6	10	0.08985	0.747784
GRIA3_MOUSE,A2VDF5_MOUSE,	-0.4	-0.6	-0.1	52	-0.6	-0.8	-0.4	51	0.2	-0.1	0.5	103	0.090671	0.74858
Q8BNI6_MOUSE,Q80TT4_MOUSE,Q3TSX8_MOUSE,	-1.1	-1.4	-0.9	59	-1.3	-1.5	-1.1	72	0.2	-0.1	0.4	131	0.093621	0.766801
STX1B_MOUSE,	-0.2	-0.4	0	75	-0.4	-0.6	-0.2	57	0.2	-0.1	0.4	132	0.096793	0.786538
A2ALL9_MOUSE,	0.5	0.3	0.7	114	0.3	0.2	0.5	92	0.2	-0.1	0.4	206	0.097755	0.788096
NOE1_MOUSE,Q8R357_MOUSE,	-1.8	-2.9	-0.9	2	-2.9	-3.8	-2.1	3	1.1	-0.3	2.6	5	0.098512	0.788096
Q6P1F5_MOUSE,Q9D689_MOUSE,HIP1R_MOUSE,Q6ZQ77_MOUSE,Q3UJ14_MOUSE,	0.5	-0.2	1.5	7	1.4	0.8	2.2	5	-0.9	-1.9	0.2	12	0.10082	0.798921
MYADM_MOUSE,Q0VE46_MOUSE,	-1.5	-2.5	-0.6	2	-0.5	-1.4	0.4	3	-1	-2.4	0.3	5	0.10215	0.798921
ACTZ_MOUSE,	1.1	0.6	1.6	7	1.6	1.2	2.1	9	-0.5	-1.2	0.2	16	0.10264	0.798921
CEND_MOUSE,	-1.3	-1.5	-1.1	36	-1.5	-1.8	-1.3	32	0.2	-0.1	0.5	68	0.10407	0.798921
SPTB2_MOUSE,	1.5	1.4	1.7	178	1.6	1.5	1.8	156	-0.1	-0.3	0.1	334	0.10443	0.798921
Q6PCX2_MOUSE,SC6A1_MOUSE,	-0.3	-0.6	0	29	-0.6	-0.9	-0.3	31	0.3	-0.1	0.7	60	0.10451	0.798921
B1AQX9_MOUSE,	-0.1	-0.4	0.1	67	-0.3	-0.6	-0.1	57	0.2	-0.1	0.5	124	0.10713	0.812928
VATH_MOUSE,	1.7	1.4	1.9	31	1.9	1.7	2.2	45	-0.2	-0.6	0.1	76	0.1109	0.835393
VDAC2_MOUSE,	-1.1	-1.3	-1	86	-1.3	-1.5	-1.1	65	0.2	-0.1	0.4	151	0.11371	0.848731
SC31A_MOUSE,	2.4	1.7	3.3	6	3.5	2.4	4.6	4	-1	-2.4	0.3	10	0.11635	0.848731
Q80TN1_MOUSE,KCC2A_MOUSE,	-0.2	-0.3	-0.1	270	-0.3	-0.4	-0.1	247	0.1	-0.1	0.2	517	0.11744	0.848731
DPYL2_MOUSE,	-1.2	-1.5	-0.8	26	-0.8	-1.2	-0.5	23	-0.3	-0.8	0.1	49	0.11813	0.848731
Q8BSI9_MOUSE,CADH2_MOUSE,Q3UIC2_MOUSE,Q6GU11_MOUSE,	-0.5	-0.8	-0.1	18	-0.8	-1.2	-0.4	14	0.4	-0.1	0.9	32	0.11846	0.848731
Q3UWU7_MOUSE,DIRA2_MOUSE,	1.2	0.6	1.8	4	1.9	1.3	2.4	5	-0.6	-1.4	0.2	9	0.11865	0.848731
AFG32_MOUSE,Q3UDQ7_MOUSE,	-1.3	-1.5	-1.1	40	-1.5	-1.7	-1.3	42	0.2	-0.1	0.5	82	0.11882	0.848731
CD166_MOUSE,Q54AJ5_MOUSE,	-1	-1.4	-0.7	24	-1.3	-1.6	-1	28	0.3	-0.1	0.7	52	0.11925	0.848731
NB5R1_MOUSE,	-1.2	-1.4	-0.9	31	-1.4	-1.8	-1.1	24	0.3	-0.1	0.7	55	0.12152	0.851468
NDUV2_MOUSE,	-6.5	-7	-5.4	6	-5.4	-6.2	-4.6	2	-0.9	-2	0.3	8	0.12286	0.851468
LRRT1_MOUSE,	-0.5	-1.1	0.1	4	-1	-1.5	-0.5	7	0.6	-0.2	1.3	11	0.12356	0.851468
QCR2_MOUSE,	-1.4	-1.6	-1.2	74	-1.6	-1.8	-1.4	71	0.2	-0.1	0.4	145	0.12356	0.851468
BCS1_MOUSE,	-1.3	-1.7	-0.9	18	-1.7	-2.1	-1.3	13	0.4	-0.2	0.9	31	0.12397	0.851468
RAP1B_MOUSE,Q52L50_MOUSE,	-0.8	-1.2	-0.4	14	-0.4	-0.8	0	12	-0.4	-0.9	0.2	26	0.12518	0.851468
SYPH_MOUSE,B1AVA7_MOUSE,	0.8	0.5	1.1	28	0.5	0.2	0.8	21	0.3	-0.1	0.7	49	0.12541	0.851468
Q3UBN8_MOUSE,BPNT1_MOUSE,	0.4	-0.1	0.8	13	0.8	0.4	1.2	14	-0.4	-1	0.2	27	0.1311	0.884282
A2AFW7_MOUSE,Q3UA17_MOUSE,MTCH2_MOUSE,	-1	-1.2	-0.7	35	-1.2	-1.4	-0.9	31	0.2	-0.1	0.6	66	0.13211	0.885309
GRM2_MOUSE,	0.6	0.2	1.1	13	0.2	-0.3	0.7	11	0.5	-0.2	1.1	24	0.13362	0.889062
B1ASM1_MOUSE,LPP3_MOUSE,	-0.7	-1	-0.4	21	-1	-1.3	-0.7	20	0.3	-0.1	0.7	41	0.13695	0.889062
Q4FE56_MOUSE,A2AD18_MOUSE,	2.8	2.1	3.3	18	3.4	2.7	4.1	10	-0.7	-1.6	0.3	28	0.13762	0.889062
S2546_MOUSE,	-1.2	-1.5	-0.9	19	-1.5	-1.8	-1.2	19	0.3	-0.1	0.7	38	0.13784	0.889062
MBLC2_MOUSE,	-0.3	-0.9	0.3	6	-1	-1.6	-0.3	6	0.7	-0.3	1.5	12	0.13786	0.889062
NT5D3_MOUSE,	-4	-4.5	-3.4	9	-3.5	-4	-3	15	-0.5	-1.2	0.2	24	0.13793	0.889062
Q3UHH0_MOUSE,AT2B2_MOUSE,Q3UHJ3_MOUSE,	0.4	0.3	0.6	136	0.3	0.2	0.5	123	0.1	-0.1	0.3	259	0.13954	0.889062
Q9D6D0_MOUSE,	-1.3	-1.6	-0.9	19	-1.6	-1.9	-1.2	19	0.3	-0.2	0.8	38	0.13984	0.889062
ATPO_MOUSE,	-3.4	-3.7	-3.2	30	-3.2	-3.5	-2.9	25	-0.2	-0.6	0.1	55	0.14356	0.889062
L2HDH_MOUSE,	-2	-2.9	-1.1	3	-3.3	-4.4	-1.9	5	1.2	-0.4	2.6	8	0.14602	0.889062
Q6IFT3_MOUSE,	5.9	5.5	6.4	16	6.3	6	6.6	28	-0.4	-0.9	0.2	44	0.14606	0.889062
VA0D1_MOUSE,	0.3	0	0.5	48	0.1	-0.2	0.3	34	0.2	-0.1	0.5	82	0.14638	0.889062
Q542R8_MOUSE,GNAZ_MOUSE,	-0.4	-0.7	-0.1	27	-0.2	-0.4	0.1	42	-0.2	-0.6	0.1	69	0.14731	0.889062
DLGP1_MOUSE,	-0.2	-0.6	0.1	20	-0.5	-0.9	-0.2	22	0.3	-0.2	0.8	42	0.14783	0.889062
Q922R9_MOUSE,TRAP1_MOUSE,Q3UPJ8_MOUSE,Q3TSG8_MOUSE,Q922Z3_MOUSE,Q3TK29_MOUSE,	-1.9	-2.6	-1.1	8	-2.9	-4	-1.7	6	1	-0.4	2.4	14	0.14799	0.889062
DMXL2_MOUSE,	3.3	2.9	3.7	21	3.7	3.2	4.4	25	-0.5	-1.2	0.2	46	0.14849	0.889062
AT5F1_MOUSE,Q5I0W0_MOUSE,	-1.4	-1.6	-1.2	44	-1.6	-1.8	-1.4	45	0.2	-0.1	0.5	89	0.1486	0.889062
TCPD_MOUSE,Q3TII0_MOUSE,Q564F4_MOUSE,	2.2	1.7	2.6	13	2.7	2.1	3.1	10	-0.5	-1.1	0.2	23	0.14963	0.889062
GNAO_MOUSE,Q543S2_MOUSE,	-1.2	-1.4	-1	65	-1.1	-1.2	-0.9	73	-0.1	-0.4	0.1	138	0.14965	0.889062
NPTN_MOUSE,	0.5	0.2	0.7	39	0.3	0	0.5	34	0.2	-0.1	0.5	73	0.1499	0.889062
Q3UYF9_MOUSE,	-0.4	-0.7	-0.1	26	-0.2	-0.4	0.1	40	-0.2	-0.6	0.1	66	0.15174	0.894832
DHRS7_MOUSE,	1.1	0.5	1.7	6	0.5	-0.1	1.2	9	0.6	-0.3	1.4	15	0.15357	0.900479
A2AD89_MOUSE,ATAD3_MOUSE,Q3TA78_MOUSE,	-1.5	-1.8	-1.2	23	-1.8	-2.1	-1.5	22	0.3	-0.1	0.7	45	0.15709	0.91216
CAN5_MOUSE,Q3U2P3_MOUSE,Q3TPL4_MOUSE,	-1.5	-2.2	-0.7	6	-0.9	-1.4	-0.3	11	-0.6	-1.5	0.3	17	0.15733	0.91216
Q3URD4_MOUSE,GBRA1_MOUSE,Q544F7_MOUSE,	0.2	-0.2	0.6	14	-0.1	-0.5	0.3	14	0.4	-0.2	0.9	28	0.16017	0.916155
IQGA2_MOUSE,	1.6	1.3	1.8	55	1.4	1.1	1.6	45	0.2	-0.1	0.5	100	0.16037	0.916155
Q8BU34_MOUSE,PSMD1_MOUSE,Q05CG9_MOUSE,	3.4	2.3	4.5	5	2.3	1.4	3.4	4	1	-0.5	2.5	9	0.16119	0.916155
CKAP5_MOUSE,	1.6	1.2	2	19	2	1.6	2.4	14	-0.4	-1	0.2	33	0.16157	0.916155
D0VYV6_MOUSE,	2	1.7	2.3	35	2.3	2	2.6	30	-0.3	-0.7	0.2	65	0.16334	0.92113
Q3UIA9_MOUSE,FUMH_MOUSE,	-5.4	-5.8	-4.9	6	-4.9	-5.5	-4.4	17	-0.5	-1.2	0.3	23	0.16771	0.936666
FA49B_MOUSE,	1.9	1.6	2.2	24	2.1	1.8	2.4	25	-0.2	-0.6	0.1	49	0.16791	0.936666
UBA1_MOUSE,B9EHN0_MOUSE,	2.6	2.3	3	31	2.9	2.6	3.2	33	-0.3	-0.7	0.2	64	0.17243	0.954435
CMTD1_MOUSE,	-1.6	-2	-1.2	9	-2	-2.5	-1.5	6	0.4	-0.2	1.1	15	0.17321	0.954435
ECHA_MOUSE,	-2.8	-3.2	-2.4	21	-2.5	-2.8	-2.2	23	-0.3	-0.8	0.2	44	0.17387	0.954435
B1AQZ0_MOUSE,	-0.2	-0.6	0.2	17	0.2	-0.2	0.6	17	-0.4	-0.9	0.2	34	0.17518	0.956538
K2C1_MOUSE,	6.1	5.8	6.3	30	6.3	6	6.7	25	-0.3	-0.7	0.2	55	0.17657	0.959054
TNPO1_MOUSE,	0.7	-0.3	1.7	4	1.5	0.8	2.2	5	-0.8	-2	0.5	9	0.17989	0.971971
ATPA_MOUSE,	-2.9	-3.1	-2.7	79	-2.7	-2.9	-2.5	75	-0.1	-0.4	0.1	154	0.18178	0.977067
S38A3_MOUSE,	-0.9	-1.7	-0.2	3	-1.7	-2.7	-0.8	3	0.8	-0.4	2	6	0.18412	0.984517
CUL4A_MOUSE,	2.2	1.3	3.3	5	3.1	2.3	4.2	4	-0.9	-2.3	0.5	9	0.18654	0.992316
Q3TD08_MOUSE,Q545R3_MOUSE,Q3TSR4_MOUSE,B7ZWC0_MOUSE,NDRG1_MOUSE,	-2	-3	-1	2	-1.2	-2	-0.2	4	-0.9	-2.3	0.5	6	0.18855	0.994037
KINH_MOUSE,Q5BL10_MOUSE,	0.5	-0.1	1.3	5	1.4	0.3	2.3	4	-0.8	-2	0.5	9	0.18879	0.994037
Q7JD03_MOUSE,A3E4B0_MOUSE,A3R455_MUSMC,Q7JCZ1_MOUSE,COX2_MOUSE,Q5GA81_MUSMM,A3R481_MOUSE,	-1.2	-1.5	-1	32	-1.4	-1.7	-1.2	28	0.2	-0.1	0.5	60	0.19135	0.99859
OCAD1_MOUSE,	-1.5	-1.8	-1.3	36	-1.7	-2	-1.5	29	0.2	-0.1	0.5	65	0.19159	0.99859
A2VDF7_MOUSE,S4A4_MOUSE,A7E1Z5_MOUSE,	-1	-1.3	-0.6	32	-1.2	-1.5	-0.9	31	0.3	-0.2	0.7	63	0.193	1
AATM_MOUSE,	-4.7	-4.9	-4.4	35	-4.9	-5.2	-4.6	29	0.2	-0.2	0.6	64	0.19729	1
D1FNM8_MOUSE,	0.4	0.2	0.6	82	0.3	0.1	0.5	79	0.2	-0.1	0.4	161	0.1985	1
FHL3_MOUSE,A2A781_MOUSE,A2A782_MOUSE,	-2.2	-3	-1.4	2	-2.7	-3.3	-2.2	5	0.6	-0.4	1.5	7	0.20117	1
HIBCH_MOUSE,	-2.1	-2.8	-1.5	6	-1.5	-2.3	-0.8	7	-0.6	-1.6	0.4	13	0.20167	1
Q3V2Z8_MOUSE,	1	-0.1	2	3	0.2	-0.5	0.9	5	0.8	-0.5	2	8	0.20873	1
ITPR1_MOUSE,	1.6	1.2	2	22	1.3	0.8	1.7	13	0.3	-0.2	0.9	35	0.21155	1
KPYM_MOUSE,	-1.3	-1.7	-1	19	-1	-1.4	-0.7	18	-0.3	-0.8	0.2	37	0.2132	1
Q5DTI3_MOUSE,	0.2	-0.1	0.5	25	0	-0.4	0.3	24	0.2	-0.2	0.7	49	0.21494	1
B2RSH2_MOUSE,	-1.3	-1.6	-1.1	33	-1.1	-1.4	-0.8	24	-0.2	-0.6	0.2	57	0.21651	1
Q545P0_MOUSE,Q3TSQ1_MOUSE,AT1B1_MOUSE,	0	-0.1	0.2	97	-0.1	-0.2	0.1	105	0.1	-0.1	0.3	202	0.21827	1
Q4VA93_MOUSE,	2	1.5	2.5	20	2.6	1.4	3.1	25	-0.6	-1.3	0.6	45	0.22216	1
SCMC3_MOUSE,	-1.2	-1.5	-0.9	25	-1.4	-1.7	-1.1	32	0.2	-0.2	0.6	57	0.22244	1
NDUB9_MOUSE,	-1.4	-1.8	-1.1	19	-1.7	-2	-1.3	14	0.2	-0.2	0.7	33	0.22303	1
O55108_MOUSE,O55107_MOUSE,BASI_MOUSE,	0	-0.4	0.3	27	-0.3	-0.6	0.1	27	0.2	-0.2	0.7	54	0.22613	1
H2AY_MOUSE,	1.5	1.1	2.1	11	1.9	1.5	2.4	13	-0.4	-1	0.3	24	0.22647	1
LRP1_MOUSE,	0.5	-0.1	1	8	0	-0.6	0.6	10	0.5	-0.3	1.3	18	0.22796	1
Q6P5F1_MOUSE,A3KG02_MOUSE,A3KG00_MOUSE,EPHB2_MOUSE,A3KG01_MOUSE,	0.3	-0.4	1.1	7	-0.2	-0.9	0.4	5	0.5	-0.4	1.6	12	0.22809	1
Q6NZM3_MOUSE,DCTN1_MOUSE,	0.8	0.3	1.3	14	1.2	0.8	1.7	18	-0.4	-1	0.3	32	0.22811	1
Q91V55_MOUSE,	1.8	1.2	2.5	3	2.3	1.7	3.2	5	-0.5	-1.6	0.4	8	0.23011	1
HCN1_MOUSE,	0.4	-0.1	1	10	0	-0.6	0.6	8	0.4	-0.3	1.2	18	0.23063	1
MOBP_MOUSE,	-0.9	-1.4	-0.3	6	-0.3	-1	0.4	4	-0.5	-1.4	0.4	10	0.23119	1
GRM3_MOUSE,	-0.3	-0.7	0.1	17	-0.6	-1	-0.2	21	0.3	-0.2	0.9	38	0.23213	1
FA49A_MOUSE,	1.7	1.3	2.1	17	1.9	1.6	2.4	16	-0.3	-0.8	0.2	33	0.23243	1
Q1WIL9_MOUSE,CADM1_MOUSE,	-0.9	-1.4	-0.5	12	-1.2	-1.6	-0.9	17	0.3	-0.2	0.8	29	0.23525	1
Q69ZW4_MOUSE,Q3U7X9_MOUSE,Q8C2J5_MOUSE,	2.2	2	2.4	82	2.4	2.2	2.6	83	-0.1	-0.4	0.1	165	0.23578	1
S12A2_MOUSE,	-0.7	-1.2	-0.3	11	-0.4	-0.9	0.1	11	-0.4	-1	0.3	22	0.23584	1
PACS1_MOUSE,	2.5	2.1	3	11	2.9	2.4	3.5	12	-0.4	-1.1	0.3	23	0.23585	1
NMDE2_MOUSE,	-0.1	-0.3	0.1	87	-0.3	-0.5	-0.1	69	0.1	-0.1	0.4	156	0.23965	1
Q3TY61_MOUSE,DLGP3_MOUSE,B1AS06_MOUSE,	-0.3	-0.8	0.2	7	-0.8	-1.4	-0.1	5	0.5	-0.4	1.3	12	0.24167	1
HOME1_MOUSE,	0.1	-0.6	0.9	5	-0.5	-1.3	0.3	4	0.6	-0.5	1.7	9	0.24202	1
Q8C7Z5_MOUSE,B9EIV1_MOUSE,Q56VN0_MOUSE,Q499F6_MOUSE,IRK10_MOUSE,	-1	-1.8	-0.3	5	-1.7	-2.6	-0.8	2	0.7	-0.5	1.8	7	0.24254	1
ES1_MOUSE,	-5.6	-6.2	-4.9	3	-5	-5.7	-4.4	3	-0.5	-1.4	0.4	6	0.24405	1
CPNE6_MOUSE,	3.7	3.1	4.2	9	3.3	2.9	3.7	13	0.4	-0.3	1	22	0.2452	1
MGST3_MOUSE,	-1	-1.5	-0.5	11	-1.4	-1.9	-0.8	11	0.4	-0.3	1.1	22	0.24643	1
Q8CF96_MOUSE,	0.5	0.1	1	15	0.2	-0.2	0.7	11	0.3	-0.3	0.9	26	0.24674	1
Q9CZB4_MOUSE,B1AV13_MOUSE,APOOL_MOUSE,	-0.8	-1.2	-0.4	13	-1.1	-1.5	-0.7	14	0.3	-0.3	0.8	27	0.24729	1
SFXN1_MOUSE,	-1.4	-1.7	-1.1	25	-1.6	-1.8	-1.4	33	0.2	-0.2	0.5	58	0.24826	1
Q3UY19_MOUSE,Q2KHL7_MOUSE,	-0.8	-1.2	-0.5	21	-1.1	-1.4	-0.7	16	0.2	-0.2	0.7	37	0.24992	1
Q3TEX7_MOUSE,MFN2_MOUSE,	-1	-1.3	-0.6	24	-1.2	-1.6	-0.9	26	0.2	-0.2	0.7	50	0.25672	1
LRC4B_MOUSE,	0.1	-0.4	0.6	13	-0.3	-0.8	0.3	13	0.4	-0.3	1	26	0.25803	1
Q3USR5_MOUSE,B2KFV9_MOUSE,FBX2_MOUSE,	-1.9	-2.7	-1.1	3	-1.2	-2.2	-0.2	2	-0.7	-1.9	0.6	5	0.25855	1
Q80VM5_MOUSE,	-0.3	-0.5	0	52	-0.4	-0.6	-0.2	46	0.1	-0.2	0.4	98	0.25922	1
SYUA_MOUSE,	0.9	0.3	1.6	6	0.5	-0.1	1	7	0.5	-0.4	1.4	13	0.26229	1
ADCK1_MOUSE,	-1.4	-1.9	-0.9	10	-1.7	-2.2	-1.3	10	0.3	-0.3	1	20	0.26335	1
B5TVM2_MOUSE,B5TVM6_MOUSE,B5TVM3_MOUSE,B5TVM5_MOUSE,B5TVM4_MOUSE,B5TVM7_MOUSE,	-0.9	-1.6	-0.2	11	-1.5	-2.2	-0.7	6	0.6	-0.5	1.6	17	0.26544	1
IDHP_MOUSE,	-5.3	-5.9	-4.6	7	-4.8	-5.5	-4.1	9	-0.5	-1.4	0.6	16	0.26608	1
B2RTP7_MOUSE,K22E_MOUSE,	6	5.5	6.4	21	6.3	5.8	6.8	22	-0.3	-1	0.3	43	0.26627	1
Q99K69_MOUSE,	1.3	1	1.6	26	1.5	1.2	1.8	20	-0.2	-0.6	0.2	46	0.26646	1
IDH3A_MOUSE,	-4.6	-4.9	-4.3	25	-4.4	-4.7	-4.1	24	-0.2	-0.6	0.2	49	0.26653	1
Q3UDZ1_MOUSE,RHOG_MOUSE,	-0.8	-1.5	-0.1	5	-0.3	-1	0.3	5	-0.5	-1.4	0.4	10	0.26665	1
DBC1_MOUSE,	-0.2	-0.8	0.5	8	-0.9	-1.7	0.4	5	0.7	-0.7	1.8	13	0.26781	1
LAMC1_MOUSE,	-2.7	-3.3	-2.1	9	-2.3	-2.9	-1.7	7	-0.4	-1.2	0.4	16	0.2701	1
Q8VDX7_MOUSE,	4	3.7	4.3	33	4.2	3.9	4.5	36	-0.2	-0.6	0.2	69	0.27243	1
SAM50_MOUSE,	-1.2	-1.5	-1	27	-1.4	-1.7	-1.1	29	0.2	-0.2	0.5	56	0.27261	1
VATB2_MOUSE,	2.4	2	2.8	19	2.1	1.6	2.6	19	0.3	-0.3	0.9	38	0.27306	1
SYN2_MOUSE,	2.2	1.9	2.4	76	2	1.8	2.3	52	0.1	-0.2	0.4	128	0.27336	1
CY1_MOUSE,	-1.4	-1.6	-1.2	57	-1.6	-1.8	-1.3	41	0.1	-0.2	0.4	98	0.27533	1
AUXI_MOUSE,B1AYC5_MOUSE,	1.9	1.4	2.4	10	2.2	1.8	2.6	14	-0.3	-0.9	0.3	24	0.27652	1
CAH2_MOUSE,	-2.1	-2.8	-1.4	5	-1.4	-2.5	-0.3	2	-0.7	-2	0.6	7	0.27815	1
DNJC5_MOUSE,A2AUE2_MOUSE,	0.3	0	0.5	38	0.1	-0.2	0.4	31	0.2	-0.2	0.5	69	0.28047	1
Q3TY51_MOUSE,Q6NXI9_MOUSE,KIF5C_MOUSE,Q8CHF1_MOUSE,	0.8	0.1	1.6	6	1.4	0.5	2.3	5	-0.6	-1.8	0.6	11	0.28398	1
DJC11_MOUSE,A2A8C9_MOUSE,	-1.1	-1.4	-0.8	26	-1.3	-1.6	-1	25	0.2	-0.2	0.6	51	0.28448	1
LYRIC_MOUSE,	0.6	0	1.1	10	0.1	-0.5	0.8	8	0.4	-0.4	1.3	18	0.28466	1
LRRC7_MOUSE,	-0.4	-0.9	0	16	-0.8	-1.4	-0.2	9	0.4	-0.4	1.1	25	0.28488	1
PLLP_MOUSE,	-0.9	-1.9	0.1	2	-0.3	-1	0.4	4	-0.6	-1.8	0.6	6	0.2881	1
ACTY_MOUSE,	1.6	1.1	2.1	8	1.9	1.5	2.3	11	-0.3	-1	0.3	19	0.28985	1
Q6P9K9_MOUSE,	0.2	-0.2	0.5	24	-0.1	-0.5	0.4	15	0.3	-0.3	0.8	39	0.29252	1
SF3B1_MOUSE,	1.5	1.1	2.4	13	2.1	1.5	2.9	14	-0.5	-1.5	0.5	27	0.29306	1
A2AEG6_MOUSE,	-0.2	-0.4	0	63	-0.4	-0.6	-0.1	68	0.1	-0.1	0.4	131	0.29351	1
ODO2_MOUSE,	-3.3	-3.6	-3	16	-3.5	-3.9	-3.1	13	0.2	-0.2	0.7	29	0.29533	1
LTMD1_MOUSE,	-1.5	-1.8	-1.1	18	-1.7	-2.1	-1.3	16	0.2	-0.3	0.7	34	0.2971	1
DYHC1_MOUSE,	1.3	1	1.7	39	1.5	1.2	1.9	39	-0.2	-0.7	0.3	78	0.29926	1
AT2A2_MOUSE,Q5DTI2_MOUSE,	0.7	0.5	0.9	104	0.6	0.4	0.8	98	0.1	-0.1	0.4	202	0.3004	1
NEUM_MOUSE,	-1.7	-2	-1.4	18	-1.9	-2.2	-1.6	21	0.2	-0.2	0.6	39	0.30063	1
A8XUV6_MOUSE,TCPA2_MOUSE,	1.8	1.3	2.2	11	2.1	1.5	2.7	12	-0.4	-1.1	0.4	23	0.30139	1
B1AU25_MOUSE,B1AU24_MOUSE,AIFM1_MOUSE,	-2.5	-2.8	-2.2	25	-2.7	-3	-2.4	22	0.2	-0.2	0.5	47	0.30223	1
A2AA49_MOUSE,Q3UE40_MOUSE,GNA13_MOUSE,	-0.9	-1.2	-0.5	23	-0.7	-1	-0.3	21	-0.2	-0.7	0.2	44	0.30308	1
ATLA3_MOUSE,	-0.1	-1	0.8	4	0.5	-0.3	1.3	3	-0.6	-1.8	0.6	7	0.30703	1
Q8CHG1_MOUSE,DCLK1_MOUSE,A3KN70_MOUSE,	1.5	1.1	2	9	1.8	1.3	2.5	8	-0.3	-1.1	0.4	17	0.30752	1
SYNPR_MOUSE,	0.1	-0.5	0.9	7	-0.3	-1	0.4	5	0.5	-0.5	1.4	12	0.30866	1
IQEC1_MOUSE,	0.2	0	0.5	47	0.1	-0.1	0.3	51	0.1	-0.2	0.5	98	0.30955	1
Q2NLC5_MOUSE,Q8R3X4_MOUSE,TIM44_MOUSE,	-2.1	-2.7	-1.5	8	-1.7	-2.3	-1.2	8	-0.4	-1.2	0.4	16	0.31052	1
KALRN_MOUSE,	1.7	1.1	2.3	18	1.3	0.8	1.8	17	0.4	-0.4	1.2	35	0.31113	1
Q8JZU2_MOUSE,	-1.5	-1.8	-1.2	18	-1.7	-2	-1.3	17	0.2	-0.2	0.6	35	0.31178	1
B9EIV2_MOUSE,EPHA6_MOUSE,	1	0.1	1.8	4	0.4	-0.1	1	6	0.5	-0.5	1.5	10	0.3122	1
TNPO2_MOUSE,	1	0.3	1.9	7	1.5	1	1.9	10	-0.4	-1.3	0.5	17	0.31242	1
UBP5_MOUSE,Q3U4W8_MOUSE,	1.9	1.4	2.5	8	2.3	1.7	2.9	6	-0.4	-1.2	0.4	14	0.31329	1
Q4KMN5_MOUSE,NLGN1_MOUSE,	-0.2	-0.7	0.3	9	-0.6	-1.1	0	6	0.4	-0.4	1.1	15	0.31341	1
HSDL1_MOUSE,	-1.6	-2	-1.2	15	-1.8	-2.2	-1.5	16	0.2	-0.3	0.7	31	0.31621	1
Q5M9P5_MOUSE,Q8VC72_MOUSE,NDUS8_MOUSE,	-4.3	-4.7	-3.9	10	-4	-4.5	-3.5	12	-0.3	-0.9	0.3	22	0.31738	1
Q5F258_MOUSE,GIT1_MOUSE,	2.3	1.9	3.7	9	2	1.5	2.6	13	0.4	-0.4	1.8	22	0.31848	1
RUFY3_MOUSE,	1.2	0.7	1.7	11	1.6	0.8	2.7	9	-0.4	-1.8	0.5	20	0.31983	1
GRIN1_MOUSE,	-1.8	-2.3	-1.3	8	-1.5	-2	-1	9	-0.3	-1	0.4	17	0.32135	1
TM40L_MOUSE,	-0.9	-1.3	-0.5	12	-1.2	-1.6	-0.8	13	0.3	-0.3	0.8	25	0.32145	1
UGPA_MOUSE,	2.9	2.1	3.7	5	3.6	2.4	4.7	3	-0.7	-2.1	0.9	8	0.32158	1
OTUB1_MOUSE,	1.4	1	1.8	12	1.7	1.3	2.1	14	-0.3	-0.8	0.3	26	0.32448	1
PP1B_MOUSE,Q542E7_MOUSE,Q3TBE5_MOUSE,	1.8	1.3	2.2	15	2.1	1.6	2.5	12	-0.3	-0.9	0.3	27	0.32614	1
VIAAT_MOUSE,Q49S98_MOUSE,	0.6	0	1.1	9	0.2	-0.4	0.8	7	0.4	-0.4	1.2	16	0.32638	1
NF1_MOUSE,B1AQE8_MOUSE,B1AQE7_MOUSE,	2.3	1.6	3.1	10	1.7	1	2.8	7	0.6	-0.7	1.7	17	0.32698	1
Q3US81_MOUSE,	-0.3	-0.5	-0.1	71	-0.4	-0.6	-0.2	77	0.1	-0.2	0.4	148	0.32948	1
AP3B2_MOUSE,	2.1	1.8	2.5	29	2.3	2	2.6	31	-0.2	-0.6	0.2	60	0.33001	1
B1P942_MOUSE,A7LAI9_MOUSE,B0F2B4_MOUSE,	0.1	-0.4	0.7	9	-0.3	-0.8	0.3	7	0.4	-0.4	1.2	16	0.33061	1
Q6A0A4_MOUSE,Q8R1E1_MOUSE,LGAT1_MOUSE,Q3UZK0_MOUSE,	0.2	-0.5	1.1	4	0.8	-0.1	2.1	4	-0.6	-2.2	0.7	8	0.33227	1
NDUV1_MOUSE,	-4.9	-5.2	-4.6	21	-4.7	-5.1	-4.3	15	-0.2	-0.7	0.3	36	0.33656	1
RMD3_MOUSE,	-1.2	-1.6	-0.7	12	-1.4	-1.9	-0.9	7	0.3	-0.4	0.9	19	0.33702	1
K1C10_MOUSE,A2A513_MOUSE,	5.9	5.6	6.1	45	6	5.7	6.3	48	-0.2	-0.5	0.2	93	0.33763	1
A2AGI2_MOUSE,A2AGI1_MOUSE,B2RWZ9_MOUSE,Q69ZI4_MOUSE,	-0.2	-0.5	0.2	16	-0.4	-0.8	0	14	0.2	-0.3	0.8	30	0.33821	1
TNPO3_MOUSE,Q6DI95_MOUSE,	1.5	0.9	2.4	7	1.9	1.4	2.5	10	-0.4	-1.3	0.6	17	0.34353	1
NPTX1_MOUSE,A2ACL9_MOUSE,	0.1	-0.5	0.7	7	-0.2	-0.7	0.2	11	0.3	-0.4	1.1	18	0.34367	1
Q9DAM8_MOUSE,Q3UNQ1_MOUSE,Q9DA45_MOUSE,Q9D5I5_MOUSE,	-2.8	-3.2	-2.5	22	-3	-3.4	-2.7	16	0.2	-0.2	0.6	38	0.34404	1
SE6L2_MOUSE,	0.8	0.2	1.3	6	0.4	-0.1	0.9	8	0.3	-0.4	1.1	14	0.34413	1
B1ASZ0_MOUSE,GLPK_MOUSE,Q3TEN9_MOUSE,	-1	-1.3	-0.8	30	-1.2	-1.5	-0.9	25	0.2	-0.2	0.5	55	0.34566	1
K1045_MOUSE,	0.2	-0.4	0.7	6	0.5	0	0.9	9	-0.3	-1	0.4	15	0.34592	1
VGLU1_MOUSE,	0.9	0.7	1.1	45	0.8	0.5	1	45	0.1	-0.2	0.5	90	0.34707	1
A3KFW2_MOUSE,TINAL_MOUSE,Q4FJX7_MOUSE,	-2.3	-3.3	-1.4	2	-1.7	-2.6	-0.8	3	-0.6	-1.9	0.7	5	0.34946	1
GNAS2_MOUSE,GNAS1_MOUSE,	-0.7	-1.2	-0.3	13	-0.5	-0.9	-0.1	13	-0.2	-0.8	0.3	26	0.3502	1
Q68FL0_MOUSE,	0.2	-0.2	0.5	21	0	-0.4	0.3	23	0.2	-0.3	0.6	44	0.35116	1
PSD13_MOUSE,B2RT97_MOUSE,	2.6	1.7	3.7	2	3.1	2.5	3.9	6	-0.5	-1.7	0.7	8	0.35228	1
Q5ND42_MOUSE,Q3TGI6_MOUSE,Q3UE53_MOUSE,PIPNA_MOUSE,Q3TIQ3_MOUSE,	0.4	0	0.7	17	0.6	0.1	1.1	10	-0.3	-0.8	0.3	27	0.35254	1
A3KML3_MOUSE,1433T_MOUSE,	1.2	0.9	1.5	20	1.4	1	1.8	15	-0.2	-0.7	0.3	35	0.353	1
Q3UTP8_MOUSE,Q8BXT5_MOUSE,Q3US35_MOUSE,Q9ESU8_MOUSE,SATT_MOUSE,	-1.3	-1.7	-0.8	12	-1.6	-2.1	-1	8	0.3	-0.4	1	20	0.35371	1
Q6ZQK4_MOUSE,	2	1.5	2.6	10	2.3	1.8	2.9	10	-0.3	-1.1	0.5	20	0.3538	1
NDUBA_MOUSE,	-1.5	-1.7	-1.2	26	-1.6	-2	-1.3	17	0.2	-0.2	0.6	43	0.35425	1
Q80U36_MOUSE,	1.2	0.7	1.6	16	1.4	1	1.9	15	-0.3	-0.9	0.3	31	0.35655	1
SYUB_MOUSE,	0.5	0	1.1	8	0.2	-0.4	0.8	7	0.4	-0.4	1.1	15	0.35817	1
DCAKD_MOUSE,	-0.5	-1	0.1	10	-0.8	-1.3	-0.2	9	0.3	-0.4	1	19	0.35907	1
A2AI77_MOUSE,CNKR2_MOUSE,	0.3	-0.2	0.8	15	0	-0.5	0.5	13	0.3	-0.4	0.9	28	0.36094	1
K0090_MOUSE,A2AMV0_MOUSE,A1L2Z3_MOUSE,	0.4	-0.3	1.2	8	0.1	-0.4	0.5	13	0.4	-0.5	1.3	21	0.3614	1
DC1L2_MOUSE,Q3UGJ3_MOUSE,	0.5	-0.3	1.5	3	1	0.4	1.6	5	-0.5	-1.5	0.7	8	0.36328	1
ODO1_MOUSE,	-4.1	-4.4	-3.8	32	-4	-4.2	-3.7	31	-0.2	-0.5	0.2	63	0.3638	1
Q3UVV3_MOUSE,Q5SYH5_MOUSE,OMGP_MOUSE,	-0.3	-0.8	0.4	11	0.1	-0.5	0.6	11	-0.3	-1.1	0.5	22	0.36484	1
B2KGP3_MOUSE,PPM1E_MOUSE,	2.7	2.2	3.2	9	2.3	1.8	2.9	5	0.3	-0.4	1	14	0.36621	1
ECHB_MOUSE,	-1.8	-2.3	-1.3	8	-2.2	-2.9	-1.5	4	0.4	-0.5	1.2	12	0.3666	1
NLGN2_MOUSE,	-0.2	-0.6	0.3	10	-0.4	-0.8	0	15	0.3	-0.3	0.9	25	0.36682	1
TWF2_MOUSE,	4.8	4	5.6	6	4.3	3.6	5.1	3	0.5	-0.6	1.6	9	0.37106	1
DLG2_MOUSE,	-0.5	-0.7	-0.3	53	-0.6	-0.8	-0.4	54	0.1	-0.2	0.4	107	0.37325	1
Q6P6P5_MOUSE,	0.5	0.1	0.9	12	0.3	-0.1	0.6	13	0.2	-0.3	0.8	25	0.37469	1
Q3TXK7_MOUSE,	-1.3	-1.5	-1	33	-1.1	-1.4	-0.9	28	-0.1	-0.5	0.2	61	0.37846	1
AT8A1_MOUSE,A1L332_MOUSE,Q8BR88_MOUSE,Q5DTG0_MOUSE,	0.7	0.4	1.2	22	0.5	0.1	0.9	18	0.2	-0.3	0.8	40	0.3817	1
CPNS1_MOUSE,	0.3	-0.3	1	5	0.7	0.1	1.3	4	-0.4	-1.3	0.5	9	0.38378	1
AT1B3_MOUSE,Q544Q7_MOUSE,	-0.8	-1.3	-0.4	13	-0.6	-1	-0.3	16	-0.2	-0.7	0.3	29	0.38449	1
AOFB_MOUSE,Q14CG9_MOUSE,	-1.2	-1.5	-0.9	22	-1.4	-1.7	-1.1	22	0.2	-0.2	0.6	44	0.38456	1
FA81A_MOUSE,	-1.8	-2.2	-1.3	11	-2	-2.6	-1.5	7	0.3	-0.4	1	18	0.38463	1
1433E_MOUSE,Q5SS40_MOUSE,	1.2	0.9	1.5	24	1.3	1	1.7	16	-0.2	-0.6	0.3	40	0.38474	1
PYGM_MOUSE,	3.2	2.3	4	5	2.7	2.1	3.3	7	0.4	-0.6	1.5	12	0.38519	1
ATP4A_MOUSE,	-0.4	-0.6	-0.2	43	-0.5	-0.7	-0.3	39	0.1	-0.2	0.4	82	0.38532	1
RAP2A_MOUSE,	-1.1	-1.6	-0.7	11	-0.8	-1.4	-0.2	6	-0.3	-1	0.4	17	0.38765	1
Q3TT81_MOUSE,B2M1R7_MOUSE,PCBP2_MOUSE,	0.9	0.4	1.4	12	1.2	0.6	1.9	10	-0.3	-1.1	0.5	22	0.38974	1
SRPRB_MOUSE,	0.4	-0.3	1	6	0	-0.8	0.7	6	0.4	-0.6	1.4	12	0.39003	1
RL7_MOUSE,Q5M9N8_MOUSE,Q3UBI6_MOUSE,	0.4	0	0.8	15	0.6	0.1	1.1	11	-0.2	-0.9	0.4	26	0.39036	1
NTRK3_MOUSE,	0.1	-0.4	0.6	11	-0.2	-0.8	0.3	7	0.3	-0.4	1	18	0.39098	1
Q91YK1_MOUSE,Q8C140_MOUSE,CMC2_MOUSE,	-1.2	-1.6	-0.9	19	-1.4	-1.7	-1.1	17	0.2	-0.3	0.6	36	0.39439	1
CR019_MOUSE,	-1.1	-1.7	-0.5	6	-1.4	-2	-0.8	6	0.3	-0.5	1.1	12	0.39606	1
MTCH1_MOUSE,	-1.2	-1.5	-1	39	-1.4	-1.6	-1.1	35	0.1	-0.2	0.5	74	0.39623	1
A2A5S1_MOUSE,XPO2_MOUSE,	1.1	0.6	1.6	15	1.3	1	1.7	19	-0.2	-0.8	0.3	34	0.3973	1
SYPL1_MOUSE,Q3TVX7_MOUSE,Q3U4T9_MOUSE,	-0.7	-1.3	0	4	-0.3	-0.9	0.2	6	-0.3	-1.2	0.5	10	0.39789	1
KSR1_MOUSE,	2.8	1.7	3.9	4	2.3	1.4	3.2	4	0.6	-0.9	1.9	8	0.39946	1
VPS35_MOUSE,Q3TRJ1_MOUSE,Q3TKU6_MOUSE,	2.7	2	3.4	9	2.3	1.8	2.9	12	0.3	-0.5	1.2	21	0.39975	1
Q3UVW2_MOUSE,GBRG2_MOUSE,Q8C7N0_MOUSE,Q8C8H5_MOUSE,B1AT55_MOUSE,	0.3	-0.3	0.9	7	-0.1	-0.8	0.6	4	0.4	-0.5	1.3	11	0.40069	1
A2CG35_MOUSE,RAB12_MOUSE,	0.1	-0.6	1.1	6	0.7	-0.2	1.6	3	-0.5	-1.7	0.8	9	0.40249	1
PHB_MOUSE,	-1.4	-1.7	-1.2	37	-1.5	-1.8	-1.3	35	0.1	-0.2	0.4	72	0.40653	1
KCNA1_MOUSE,Q8CA58_MOUSE,Q3TZ64_MOUSE,	0.1	-0.3	0.6	12	0.4	0	0.8	14	-0.2	-0.8	0.3	26	0.40782	1
K1549_MOUSE,	-0.3	-1.1	0.5	5	0.1	-0.5	0.8	6	-0.4	-1.4	0.6	11	0.40835	1
CYFP2_MOUSE,	3.3	3	3.5	53	3.1	2.8	3.4	44	0.1	-0.2	0.5	97	0.40838	1
Q543X6_MOUSE,MP2K4_MOUSE,	1.2	0.7	1.6	9	1.4	0.8	2.2	7	-0.3	-1.2	0.5	16	0.40861	1
O35619_MOUSE,VAMP2_MOUSE,Q8CHR4_MOUSE,B0QZN5_MOUSE,	0.7	0.2	1.2	8	0.4	0	0.9	9	0.3	-0.4	1	17	0.41025	1
ILF2_MOUSE,Q3UXI9_MOUSE,	1.7	1.1	2.4	5	2.1	1.5	2.6	6	-0.3	-1.2	0.5	11	0.41052	1
ROGDI_MOUSE,	2.7	2.1	3.2	6	2.4	1.8	3	8	0.3	-0.5	1.1	14	0.41074	1
SNAA_MOUSE,Q9CXX1_MOUSE,	1.3	0.8	1.7	15	1.5	1.1	1.9	13	-0.2	-0.8	0.4	28	0.4133	1
Q8R1P3_MOUSE,GPM6A_MOUSE,Q542P2_MOUSE,	-0.6	-0.8	-0.5	80	-0.7	-0.9	-0.5	69	0.1	-0.2	0.3	149	0.4139	1
TBAL3_MOUSE,B9EJS3_MOUSE,	1.7	1.4	2	19	1.9	1.6	2.2	18	-0.2	-0.6	0.3	37	0.41413	1
Q8BZN0_MOUSE,TRHDE_MOUSE,	0.4	-0.5	1.6	7	-0.1	-0.9	0.9	8	0.5	-0.8	1.9	15	0.41614	1
ASPH2_MOUSE,	1.8	1.3	2.3	10	1.5	1	2.1	9	0.3	-0.4	1	19	0.41713	1
GBRB3_MOUSE,Q8C446_MOUSE,	0.6	0	1.1	9	0.3	-0.3	0.8	11	0.3	-0.5	1	20	0.41792	1
ALDOA_MOUSE,A6ZI44_MOUSE,Q5FWB7_MOUSE,	-1.2	-1.5	-0.8	18	-1	-1.4	-0.6	14	-0.2	-0.7	0.3	32	0.41947	1
CA093_MOUSE,	-0.9	-1.8	0	4	-0.4	-1.4	0.7	3	-0.5	-1.9	0.8	7	0.41973	1
MAP4_MOUSE,	2.8	2	3.6	4	2.3	1.8	3.2	4	0.4	-0.7	1.4	8	0.42117	1
Q5M8Q0_MOUSE,RL15_MOUSE,Q3U7D2_MOUSE,	0.7	-0.1	1.3	5	0.2	-0.5	1.1	4	0.4	-0.7	1.4	9	0.42121	1
Q3UL45_MOUSE,	-2.4	-2.7	-2.1	22	-2.2	-2.5	-1.9	21	-0.1	-0.5	0.2	43	0.42164	1
AAK1_MOUSE,B2RUJ0_MOUSE,	1.5	1.2	1.9	24	1.7	1.4	2	22	-0.2	-0.6	0.3	46	0.42341	1
CT103_MOUSE,A2AT94_MOUSE,	1.2	0.2	2.2	2	0.7	-0.2	1.6	3	0.5	-0.8	1.8	5	0.42345	1
GNAI3_MOUSE,	-1.2	-1.5	-0.9	19	-1.1	-1.4	-0.7	16	-0.2	-0.6	0.3	35	0.42551	1
CP46A_MOUSE,Q3US73_MOUSE,	0	-0.6	0.5	9	0.3	-0.4	1.1	7	-0.3	-1.3	0.5	16	0.42796	1
A2AQY3_MOUSE,YMEL1_MOUSE,	-1.5	-2.1	-0.8	5	-1.8	-2.3	-1.2	9	0.3	-0.5	1.1	14	0.43176	1
TPC_MOUSE,Q80XJ6_MOUSE,	-1.6	-2.4	-0.8	3	-2	-2.6	-1.3	4	0.4	-0.6	1.3	7	0.43199	1
NLRX1_MOUSE,	-1.1	-1.6	-0.5	9	-1.4	-2.1	-0.7	6	0.3	-0.5	1.2	15	0.43206	1
FBX41_MOUSE,Q3UGY7_MOUSE,	0	-0.4	0.5	17	-0.2	-0.6	0.2	16	0.2	-0.4	0.8	33	0.43282	1
DYN1_MOUSE,	1.6	1.4	1.8	93	1.7	1.5	1.8	95	-0.1	-0.3	0.2	188	0.43455	1
RL21_MOUSE,Q9CQM8_MOUSE,	0	-0.6	0.7	5	0.4	-0.5	1.3	4	-0.4	-1.5	0.7	9	0.43466	1
PDE1A_MOUSE,Q8BRR9_MOUSE,	1.4	0.7	2.5	5	1.8	1.3	2.2	13	-0.4	-1.2	0.8	18	0.43517	1
SYT5_MOUSE,	0.3	-0.1	0.7	10	0.1	-0.3	0.5	10	0.2	-0.4	0.8	20	0.43727	1
B7ZNS2_MOUSE,DLGP4_MOUSE,	-0.8	-1.4	-0.1	8	-0.4	-1.2	0.4	4	-0.4	-1.4	0.6	12	0.4388	1
RENR_MOUSE,	-0.1	-0.9	0.8	4	-0.5	-1.2	0.2	5	0.4	-0.7	1.5	9	0.4393	1
Q3UQD0_MOUSE,TOM40_MOUSE,	-1.4	-1.7	-1.2	32	-1.6	-1.9	-1.3	23	0.1	-0.2	0.5	55	0.44209	1
SPCS3_MOUSE,	0.6	-0.2	1.5	3	0.1	-1	1.2	2	0.5	-0.9	2	5	0.44253	1
KCNA2_MOUSE,B2RS05_MOUSE,	0.1	-0.3	0.6	11	0.3	-0.1	0.7	15	-0.2	-0.7	0.4	26	0.44298	1
SUCA_MOUSE,	-2.8	-3.2	-2.4	10	-2.6	-3	-2.3	17	-0.2	-0.7	0.3	27	0.44552	1
K1C17_MOUSE,	6	5.6	6.4	20	6.2	5.8	6.7	22	-0.2	-0.8	0.4	42	0.4466	1
A8Y5N3_MOUSE,DHB11_MOUSE,	0.1	-0.4	0.6	10	-0.2	-1	0.6	6	0.3	-0.6	1.2	16	0.44721	1
SHS6L_MOUSE,	1.6	1.1	2.3	6	1.1	0.3	2.3	5	0.5	-0.9	1.6	11	0.44731	1
Q544G1_MOUSE,GBRA2_MOUSE,	0.1	-0.5	0.7	5	-0.2	-0.8	0.4	5	0.3	-0.5	1.2	10	0.44743	1
Q3UH39_MOUSE,CNTN2_MOUSE,	-0.5	-1.3	0.3	5	-0.1	-0.8	0.6	7	-0.4	-1.5	0.7	12	0.4478	1
TIM22_MOUSE,	-1.2	-1.8	-0.7	5	-1.6	-2.3	-0.8	3	0.3	-0.6	1.2	8	0.44808	1
SV2B_MOUSE,	0.5	0.3	0.8	54	0.4	0.1	0.7	43	0.1	-0.2	0.5	97	0.44859	1
PRRT1_MOUSE,A2CG20_MOUSE,	1.1	0.6	1.6	8	0.9	0.4	1.3	8	0.2	-0.4	0.9	16	0.44883	1
EFTU_MOUSE,	-3	-3.4	-2.7	16	-2.9	-3.2	-2.5	20	-0.2	-0.6	0.3	36	0.45045	1
Q5PR74_MOUSE,	-0.4	-1.6	0.8	2	-0.9	-1.8	0	5	0.5	-1	2	7	0.45394	1
NOS1_MOUSE,	1.8	1	2.6	4	2.3	1.2	3.4	2	-0.5	-1.8	0.8	6	0.45577	1
IGS21_MOUSE,	-2	-2.9	-1.2	4	-1.6	-2.6	-0.6	2	-0.5	-1.8	0.8	6	0.45661	1
STX4_MOUSE,	-0.7	-1.3	-0.1	6	-0.4	-1	0.2	6	-0.3	-1.1	0.5	12	0.45686	1
ODP2_MOUSE,	-2.7	-3	-2.4	31	-2.8	-3	-2.5	35	0.1	-0.2	0.5	66	0.45692	1
Q3TGZ3_MOUSE,Q3TKM5_MOUSE,IDH3G_MOUSE,	-3.7	-4.1	-3.4	17	-3.6	-3.9	-3.2	14	-0.2	-0.6	0.3	31	0.45713	1
Q5EBG5_MOUSE,Q6P1A9_MOUSE,Q58ET1_MOUSE,Q80UT7_MOUSE,RL7A_MOUSE,	0.9	0.1	1.6	5	1.2	0.5	2	4	-0.4	-1.5	0.7	9	0.4575	1
Q3UUB3_MOUSE,Q8VI68_MOUSE,CAD10_MOUSE,	-0.2	-0.9	0.6	4	-0.5	-1.8	0.4	5	0.5	-0.8	1.9	9	0.4587	1
Q6PHZ1_MOUSE,RL17_MOUSE,Q6ZWZ7_MOUSE,Q80V08_MOUSE,Q505B1_MOUSE,	0.6	-0.2	1.4	4	0.2	-0.7	1	4	0.4	-0.8	1.6	8	0.46177	1
ABCB7_MOUSE,A2AC46_MOUSE,	-0.9	-1.4	-0.5	15	-1.1	-1.5	-0.7	17	0.2	-0.4	0.8	32	0.4688	1
B2RSY3_MOUSE,HECAM_MOUSE,	-0.8	-1.2	-0.5	16	-1	-1.4	-0.6	15	0.2	-0.3	0.7	31	0.46931	1
MRCKB_MOUSE,B2RQQ7_MOUSE,	1.7	0.7	2.8	2	1.3	0.5	2.1	3	0.5	-0.8	1.8	5	0.46942	1
ELMO2_MOUSE,A2A5A5_MOUSE,	3.9	3	5.1	6	4.5	3.7	5.3	7	-0.5	-1.7	0.8	13	0.47026	1
S6A17_MOUSE,	0.5	0.1	0.9	21	0.3	-0.1	0.7	16	0.2	-0.4	0.7	37	0.47261	1
MTP18_MOUSE,Q3TI65_MOUSE,Q5SQ26_MOUSE,	-1.9	-2.3	-1.4	7	-2.1	-2.5	-1.6	7	0.2	-0.4	0.8	14	0.47391	1
CCD51_MOUSE,	-1.3	-1.8	-0.8	8	-1.5	-2	-1	7	0.2	-0.5	0.9	15	0.47545	1
MFF_MOUSE,	-1	-1.2	-0.7	25	-1.1	-1.4	-0.8	25	0.1	-0.3	0.5	50	0.47714	1
Q3U987_MOUSE,Q3TMC5_MOUSE,Q3TF87_MOUSE,SYDC_MOUSE,	3.9	3.4	4.4	8	4.2	3.4	4.9	9	-0.3	-1.2	0.6	17	0.47807	1
MYO5A_MOUSE,	1.3	1.1	1.5	62	1.4	1.2	1.6	65	-0.1	-0.4	0.2	127	0.47867	1
G6PI_MOUSE,	-1	-1.6	-0.4	6	-0.7	-1.6	0.3	2	-0.4	-1.5	0.7	8	0.47941	1
SRGP2_MOUSE,	1.8	1.3	2.3	11	1.6	1	2.1	13	0.2	-0.5	1	24	0.48071	1
Q8BHN8_MOUSE,ELMD2_MOUSE,	-1.2	-2.1	-0.3	2	-1.6	-2.4	-0.8	2	0.4	-0.8	1.6	4	0.48168	1
EFHA2_MOUSE,	-2.4	-2.8	-2	19	-2.6	-3	-2.1	14	0.2	-0.4	0.8	33	0.48442	1
Q790I0_MOUSE,SYVC_MOUSE,Q7TPT7_MOUSE,	1.5	1	2.3	13	1.8	1.3	2.5	10	-0.3	-1.2	0.6	23	0.48551	1
Q9MD68_MOUSE,Q5GA82_MUSMM,Q70YN3_MOUSE,Q7JD04_MOUSE,A3R454_MUSMC,A3E4A9_MOUSE,	-1.1	-1.5	-0.8	19	-1.3	-1.7	-0.9	15	0.2	-0.3	0.7	34	0.48674	1
STX12_MOUSE,A2ADS0_MOUSE,	0.4	0.1	0.7	20	0.3	-0.1	0.6	18	0.1	-0.3	0.6	38	0.48722	1
Q3SYP5_MOUSE,Q3ZAW8_MOUSE,K1C16_MOUSE,Q9EQD6_MOUSE,Q9EQD7_MOUSE,	5.9	5.5	6.3	25	6.1	5.7	6.5	22	-0.2	-0.7	0.4	47	0.48861	1
MARCS_MOUSE,	-1.8	-2.6	-1.1	3	-1.5	-2.1	-0.9	4	-0.3	-1.3	0.6	7	0.48899	1
PLCX3_MOUSE,B2RPW5_MOUSE,	3.7	2.9	4.6	3	3.2	2.2	4.3	3	0.5	-1	1.8	6	0.48939	1
ARM10_MOUSE,	-0.9	-1.4	-0.4	9	-1.1	-1.6	-0.7	10	0.2	-0.4	0.9	19	0.48965	1
EXOC4_MOUSE,Q69ZD1_MOUSE,	1.8	1.3	2.2	11	2	1.5	2.4	13	-0.2	-0.8	0.4	24	0.4907	1
AMPH_MOUSE,C6EQG9_MOUSE,	0.6	0	1.2	6	0.9	0.3	1.5	7	-0.3	-1.2	0.6	13	0.49099	1
Q7TMY2_MOUSE,ACDSB_MOUSE,	-1.9	-2.6	-1.3	4	-1.7	-2.3	-1	5	-0.3	-1.2	0.6	9	0.49151	1
Q8R5C0_MOUSE,	-1.2	-1.5	-0.9	24	-1.3	-1.6	-1	21	0.1	-0.3	0.5	45	0.49261	1
CADM3_MOUSE,	-0.3	-0.5	0	36	-0.4	-0.7	-0.1	29	0.1	-0.3	0.5	65	0.49353	1
PCYOX_MOUSE,Q3TVT6_MOUSE,Q3UYP2_MOUSE,	-0.3	-0.8	0.3	10	0	-0.6	0.6	8	-0.3	-1	0.5	18	0.49384	1
ENOA_MOUSE,Q5FW97_MOUSE,	2.1	1.9	2.4	43	2.2	2	2.5	33	-0.1	-0.4	0.2	76	0.4939	1
MARE2_MOUSE,	1.1	0.5	1.7	11	1.4	0.9	1.8	10	-0.2	-1	0.5	21	0.49452	1
NDUB8_MOUSE,	-1.5	-2	-1.1	9	-1.7	-2.1	-1.3	11	0.2	-0.4	0.7	20	0.49468	1
PALM_MOUSE,Q542N8_MOUSE,Q3TRX4_MOUSE,Q6ZQE7_MOUSE,	-1.1	-1.7	-0.6	8	-0.9	-1.4	-0.4	10	-0.2	-0.9	0.5	18	0.49753	1
A2AKW0_MOUSE,MCAR1_MOUSE,	-1.2	-1.5	-0.9	29	-1.3	-1.7	-1	15	0.1	-0.3	0.6	44	0.4981	1
AP3D1_MOUSE,	1.8	1.4	2.1	19	1.9	1.6	2.3	23	-0.2	-0.7	0.3	42	0.49926	1
IP3KA_MOUSE,	3.1	2.7	3.6	13	2.9	2.4	3.4	11	0.2	-0.5	0.9	24	0.49951	1
LNP_MOUSE,	0.7	0	1.3	5	0.4	-0.4	1.1	3	0.3	-0.6	1.2	8	0.49985	1
TMEDA_MOUSE,	0.1	-0.4	0.6	10	0.4	-0.2	1	6	-0.3	-1.1	0.5	16	0.49993	1
ERLN2_MOUSE,	-0.1	-0.4	0.3	21	-0.3	-0.6	0.1	15	0.2	-0.4	0.7	36	0.5015	1
Q7TSZ6_MOUSE,Q6GTI5_MOUSE,IMB1_MOUSE,Q3TFE8_MOUSE,	1.4	1.1	1.8	21	1.6	1.3	1.9	28	-0.1	-0.6	0.3	49	0.50159	1
DYN3_MOUSE,	1.5	1.2	1.8	30	1.4	1.1	1.6	36	0.1	-0.3	0.5	66	0.50167	1
Q3TFG3_MOUSE,Q4FZL1_MOUSE,Q3TLL6_MOUSE,IF4A1_MOUSE,Q3UXC2_MOUSE,Q3TGK7_MOUSE,Q5F2A7_MOUSE,	1.9	1.2	2.7	6	2.2	1.5	3.1	8	-0.4	-1.4	0.7	14	0.50255	1
ARHG2_MOUSE,	2.2	1.8	2.7	17	2.1	1.7	2.5	23	0.2	-0.4	0.8	40	0.5041	1
B1AX52_MOUSE,AOFA_MOUSE,Q3TPD9_MOUSE,	-1.7	-2.1	-1.4	18	-1.9	-2.2	-1.6	21	0.1	-0.3	0.6	39	0.50482	1
Q3UL78_MOUSE,	-0.7	-1.1	-0.2	9	-0.5	-0.9	0	8	-0.2	-0.8	0.4	17	0.50574	1
CAP2_MOUSE,	2.5	2	3	14	2.7	2.1	3.3	9	-0.2	-0.9	0.5	23	0.50668	1
RS7_MOUSE,Q4FZE6_MOUSE,	1.5	0.9	2.1	6	1.8	1.1	2.4	6	-0.3	-1.1	0.6	12	0.50673	1
Q6GTI3_MOUSE,Q3TD17_MOUSE,GTR1_MOUSE,Q3U2J2_MOUSE,	-1.3	-1.8	-0.8	9	-1.6	-2.1	-1	7	0.2	-0.5	1	16	0.50711	1
Q8VC68_MOUSE,Q4U256_MOUSE,	1.2	0.3	2.4	5	0.8	0.1	1.8	5	0.4	-0.9	1.8	10	0.50742	1
Q570Z8_MOUSE,	2.2	1.7	2.6	19	2	1.6	2.3	17	0.2	-0.4	0.7	36	0.50836	1
CNTP2_MOUSE,	-0.4	-0.8	0	14	-0.2	-0.7	0.3	13	-0.2	-0.8	0.4	27	0.5094	1
GPC1_MOUSE,Q3U379_MOUSE,	0.6	0	1.5	11	0.4	-0.1	0.9	10	0.3	-0.5	1.3	21	0.50998	1
Q059Q1_MOUSE,	1.8	1.5	2.1	34	1.7	1.4	2	30	0.1	-0.3	0.5	64	0.51297	1
B9EIC7_MOUSE,PHYIP_MOUSE,	4.2	3.5	5.1	8	4	3.3	4.6	6	0.3	-0.7	1.3	14	0.51301	1
B2RX08_MOUSE,Q3UGX2_MOUSE,Q3UGY4_MOUSE,	2.1	1.7	2.6	21	2.3	1.9	2.6	25	-0.2	-0.7	0.4	46	0.51349	1
RDH14_MOUSE,	-0.9	-1.4	-0.4	10	-1.1	-1.6	-0.6	12	0.2	-0.4	0.8	22	0.51369	1
DRS7B_MOUSE,	-0.8	-1.5	-0.2	7	-1.1	-1.8	-0.5	7	0.3	-0.6	1.2	14	0.51551	1
BR44_MOUSE,	-1.5	-2	-1	13	-1.8	-2.5	-1.1	5	0.3	-0.5	1.1	18	0.51572	1
Q8CFX3_MOUSE,	0.3	0	0.6	30	0.2	-0.1	0.5	26	0.1	-0.3	0.5	56	0.51607	1
RAB8A_MOUSE,Q0PD50_MOUSE,	0.3	-0.3	0.8	7	0.1	-0.5	0.6	7	0.2	-0.5	1	14	0.51644	1
KAD5_MOUSE,	-0.8	-2	0.5	3	-0.4	-1.1	0.4	5	-0.4	-1.8	1	8	0.51873	1
Q3TYH2_MOUSE,RAB15_MOUSE,Q0PD40_MOUSE,	-0.3	-1.1	0.5	4	0.1	-0.9	1.1	2	-0.4	-1.7	0.9	6	0.51874	1
B2RY22_MOUSE,A5D6Q8_MOUSE,CLAP1_MOUSE,	1.5	0.7	2.5	8	1.8	1.3	2.5	9	-0.3	-1.5	0.8	17	0.51936	1
Q3TCI7_MOUSE,Q3TI99_MOUSE,Q564E2_MOUSE,LDHA_MOUSE,	-0.9	-1.4	-0.4	10	-0.7	-1.2	-0.2	8	-0.2	-0.9	0.5	18	0.51957	1
A2AEG3_MOUSE,	-0.5	-0.8	-0.2	23	-0.6	-0.9	-0.3	24	0.1	-0.3	0.5	47	0.52037	1
CSPG5_MOUSE,	-0.7	-1.6	0.3	2	-1	-1.8	-0.3	5	0.4	-0.8	1.6	7	0.52078	1
B8JK04_MOUSE,	1.3	1.1	1.5	63	1.4	1.2	1.6	65	-0.1	-0.3	0.2	128	0.52092	1
A2AS45_MOUSE,PKP4_MOUSE,A2AS47_MOUSE,	0.7	0.1	1.4	9	0.4	-0.3	1.1	5	0.3	-0.7	1.3	14	0.52099	1
ADCL1_MOUSE,	0.5	0.2	0.9	17	0.7	0.2	1.1	14	-0.2	-0.7	0.4	31	0.5211	1
RS6_MOUSE,Q5BLK1_MOUSE,	0.4	-0.2	0.9	8	0.6	0	1.2	8	-0.2	-1.1	0.5	16	0.52182	1
SYT3_MOUSE,	0.6	0.2	1	15	0.4	-0.1	0.9	11	0.2	-0.4	0.8	26	0.52259	1
RL9_MOUSE,Q5EBQ6_MOUSE,	1.3	0.8	1.8	8	1.5	1	2.1	6	-0.2	-0.9	0.5	14	0.52295	1
Q4FJL0_MOUSE,RAB10_MOUSE,	-0.2	-0.6	0.1	23	-0.4	-0.7	0	18	0.1	-0.3	0.5	41	0.52427	1
Q7TPW6_MOUSE,MCAT_MOUSE,	-1.5	-1.9	-1.1	13	-1.7	-2.1	-1.2	10	0.2	-0.4	0.8	23	0.52477	1
YKT6_MOUSE,	0.9	0.3	1.5	4	1.2	0.6	1.8	4	-0.3	-1.1	0.6	8	0.52488	1
AGK_MOUSE,	-1.5	-1.8	-1.2	26	-1.6	-1.8	-1.3	31	0.1	-0.3	0.5	57	0.52556	1
SNPH_MOUSE,	-1.1	-1.5	-0.8	19	-1.3	-1.6	-0.9	25	0.1	-0.3	0.6	44	0.52565	1
DLGP2_MOUSE,Q0VF59_MOUSE,	-0.2	-0.7	0.2	12	-0.4	-0.9	0	13	0.2	-0.4	0.8	25	0.52653	1
A3E4A7_MOUSE,Q3TNL9_MOUSE,Q5GA84_MUSMM,Q7JD06_MOUSE,B9V1J9_MOUSE,Q4JFN6_MOUSE,NU1M_MOUSE,	-1.4	-2.1	-0.7	4	-1.7	-2.8	-0.8	3	0.4	-0.8	1.6	7	0.52761	1
KAPCB_MOUSE,	3	2.4	3.5	8	2.7	2.3	3.2	10	0.2	-0.5	1	18	0.52926	1
Q542T7_MOUSE,RAB3C_MOUSE,	-0.5	-0.8	-0.1	20	-0.6	-1	-0.2	16	0.2	-0.3	0.7	36	0.52936	1
SHAN3_MOUSE,	0.2	-0.2	0.5	28	0	-0.5	0.5	13	0.2	-0.4	0.8	41	0.52978	1
A3QM89_MOUSE,Q7M6W1_MOUSE,	0.8	0.4	1.1	17	0.9	0.6	1.2	17	-0.1	-0.6	0.3	34	0.53041	1
S27A1_MOUSE,Q544D7_MOUSE,Q3TN26_MOUSE,Q3TP13_MOUSE,	-0.3	-1	0.3	5	-0.6	-1.5	0.2	2	0.3	-0.7	1.4	7	0.53135	1
CA2D3_MOUSE,	-0.4	-0.7	0	20	-0.5	-0.9	-0.1	16	0.2	-0.4	0.7	36	0.53177	1
Q9D8L3_MOUSE,SSRD_MOUSE,Q3TVJ8_MOUSE,	0.1	-1.2	1.3	2	-0.4	-1	0.3	5	0.4	-1	1.8	7	0.53281	1
A6H6R7_MOUSE,D1LYT3_MOUSE,GBRB2_MOUSE,	0.3	-0.1	0.8	11	0.1	-0.4	0.7	11	0.2	-0.5	0.9	22	0.53518	1
TMX2_MOUSE,	0.2	-0.3	0.7	7	0	-0.5	0.5	9	0.2	-0.5	0.8	16	0.5353	1
CC127_MOUSE,	-1.1	-1.5	-0.6	9	-1.3	-2	-0.6	4	0.2	-0.6	1	13	0.53731	1
KCC2B_MOUSE,	-0.1	-0.3	0	177	-0.2	-0.3	0	162	0.1	-0.2	0.2	339	0.53767	1
T126A_MOUSE,	-1.5	-2.1	-1	5	-1.8	-2.3	-1.2	4	0.2	-0.6	1	9	0.53815	1
K22O_MOUSE,	6.3	5.7	6.8	10	6.5	5.9	7	9	-0.2	-1	0.6	19	0.53876	1
Q3UJH5_MOUSE,Q3U861_MOUSE,VATD_MOUSE,	1.8	1.3	2.3	7	2	1.5	2.5	6	-0.2	-0.9	0.5	13	0.53881	1
LPPR2_MOUSE,	0.6	-0.5	1.7	2	0.2	-0.6	1.1	3	0.4	-1	1.9	5	0.53884	1
B2RRE2_MOUSE,MY18A_MOUSE,	1.8	1.3	2.3	12	1.6	0.9	2.3	4	0.3	-0.6	1.1	16	0.53935	1
ARL8B_MOUSE,Q9DAB3_MOUSE,	-0.3	-0.7	0.1	14	-0.1	-0.6	0.4	9	-0.2	-0.8	0.4	23	0.54058	1
Q8C0E9_MOUSE,	1.6	0.9	2.2	5	1.9	1.2	2.6	4	-0.3	-1.3	0.7	9	0.54221	1
NRCAM_MOUSE,	-0.3	-0.7	0	19	-0.5	-0.8	-0.2	22	0.1	-0.3	0.5	41	0.54558	1
AUHM_MOUSE,	-3.1	-3.5	-2.6	8	-2.9	-3.4	-2.4	9	-0.2	-0.9	0.5	17	0.54581	1
H2A1K_MOUSE,A3KPD0_MOUSE,H2A3_MOUSE,H2A1H_MOUSE,H2AJ_MOUSE,H2A1F_MOUSE,A0AUV1_MOUSE,B2RVF0_MOUSE,Q8CGP4_MOUSE,H2A1_MOUSE,A2AB79_MOUSE,	1.8	1.2	2.4	5	2	1.4	2.8	5	-0.3	-1.2	0.6	10	0.54619	1
CYB5B_MOUSE,Q3TH64_MOUSE,	-0.9	-1.3	-0.5	10	-1.1	-1.5	-0.7	9	0.2	-0.4	0.7	19	0.54711	1
B1ATZ4_MOUSE,DIC_MOUSE,	-1.5	-1.9	-1.1	10	-1.7	-2.2	-1.1	6	0.2	-0.5	0.9	16	0.54741	1
CKAP4_MOUSE,	-0.1	-0.5	0.3	17	-0.3	-0.7	0.1	16	0.2	-0.4	0.7	33	0.54772	1
A2ACM7_MOUSE,	0.7	0	1.4	9	0.4	-0.2	1	8	0.3	-0.7	1.2	17	0.55031	1
CAP1_MOUSE,Q3UVJ2_MOUSE,Q3U0U5_MOUSE,Q8BPT7_MOUSE,	2	1.6	2.3	15	2.1	1.7	2.6	18	-0.2	-0.8	0.4	33	0.55052	1
CADM4_MOUSE,	-0.7	-1.1	-0.4	17	-0.6	-1	-0.2	13	-0.1	-0.6	0.4	30	0.55092	1
AP2B1_MOUSE,Q5SWR1_MOUSE,	2.3	2.1	2.5	80	2.4	2.2	2.5	89	-0.1	-0.3	0.2	169	0.55154	1
MRS2_MOUSE,	-0.9	-1.4	-0.4	9	-1.2	-1.8	-0.5	4	0.2	-0.6	1.1	13	0.55194	1
HS12A_MOUSE,	2.6	2.4	2.9	34	2.7	2.5	3.1	32	-0.1	-0.5	0.3	66	0.55406	1
TMM9B_MOUSE,	0.5	-0.3	1.2	3	0.2	-0.7	1	4	0.3	-0.8	1.4	7	0.55573	1
STB5L_MOUSE,	0.5	0	1	13	0.3	-0.3	0.9	8	0.2	-0.6	1	21	0.55733	1
Q3UC49_MOUSE,HEMH_MOUSE,Q8C3V7_MOUSE,Q91W09_MOUSE,Q544X6_MOUSE,	-2.6	-3.3	-1.9	3	-2.9	-3.4	-2.3	5	0.3	-0.6	1.2	8	0.5575	1
SCMC2_MOUSE,	-1.9	-2.5	-1.4	12	-2.1	-2.6	-1.6	10	0.2	-0.5	0.9	22	0.55796	1
CYFP1_MOUSE,	3.1	2.8	3.4	35	3	2.7	3.3	31	0.1	-0.3	0.6	66	0.55973	1
Q3UQM7_MOUSE,Q8R0X8_MOUSE,	-0.5	-1	0	8	-0.7	-1.1	-0.3	11	0.2	-0.5	0.8	19	0.56199	1
CAND1_MOUSE,	1.9	1.7	2.2	59	2	1.8	2.2	61	-0.1	-0.4	0.2	120	0.56236	1
IQEC3_MOUSE,	0.2	-0.3	0.7	7	0	-0.6	0.6	6	0.2	-0.6	1	13	0.56648	1
OPA1_MOUSE,	-1.2	-1.5	-1	54	-1.3	-1.5	-1.1	69	0.1	-0.2	0.4	123	0.56745	1
Q545H3_MOUSE,Q3UBR8_MOUSE,TI17B_MOUSE,	-1.5	-2.1	-0.8	4	-1.7	-2.3	-1.1	5	0.2	-0.6	1.1	9	0.56822	1
Q3ULT2_MOUSE,ACTN4_MOUSE,	2.7	2.1	3.1	17	2.8	2.3	3.3	19	-0.2	-0.9	0.5	36	0.56945	1
Q8K074_MOUSE,	0	-0.8	0.7	9	-0.3	-1	0.4	6	0.3	-0.7	1.2	15	0.57019	1
B9V188_MOUSE,Q9MQW4_MOUSE,A3R458_MUSMC,COX3_MOUSE,Q7JCX7_MOUSE,Q5GA78_MUSMM,A3E4B3_MOUSE,Q7JCA9_MOUSE,A3R3W7_MOUSE,	-1	-1.7	-0.3	3	-1.3	-1.9	-0.6	3	0.3	-0.7	1.2	6	0.57055	1
A2AKI5_MOUSE,A2AKI6_MOUSE,ITAV_MOUSE,	-0.5	-1.1	0.1	8	-0.8	-1.5	0	6	0.3	-0.7	1.2	14	0.57132	1
MOSC2_MOUSE,	-1.6	-1.9	-1.3	19	-1.7	-2	-1.4	28	0.1	-0.3	0.5	47	0.57134	1
LONM_MOUSE,	-2.7	-3.5	-2	4	-2.5	-3	-1.9	8	-0.2	-1.2	0.6	12	0.57236	1
CH60_MOUSE,	-4	-4.2	-3.8	39	-4.1	-4.3	-3.8	36	0.1	-0.2	0.4	75	0.57245	1
ABHD6_MOUSE,Q9D375_MOUSE,	0.5	0.2	0.9	19	0.4	0	0.8	20	0.1	-0.4	0.6	39	0.57263	1
LIGO1_MOUSE,A9DA50_MOUSE,	-0.3	-0.6	0.1	14	-0.4	-0.7	0	17	0.1	-0.4	0.6	31	0.57282	1
SNP47_MOUSE,	0.4	-0.1	0.9	10	0.6	0.1	1.2	11	-0.2	-0.9	0.5	21	0.57377	1
PP1A_MOUSE,	1.7	1.2	2.2	12	1.9	1.4	2.3	9	-0.2	-0.8	0.5	21	0.57554	1
ECHM_MOUSE,	-2.1	-2.8	-1.5	3	-1.9	-2.4	-1.4	6	-0.2	-1	0.6	9	0.57625	1
MIRO2_MOUSE,	-1.2	-1.6	-0.8	12	-1.3	-1.7	-0.9	12	0.1	-0.4	0.7	24	0.57641	1
NEGR1_MOUSE,A0A4W9_MOUSE,	-1	-1.8	-0.3	4	-0.8	-1.3	-0.4	11	-0.2	-1.1	0.6	15	0.57721	1
Q3TTX0_MOUSE,MATR3_MOUSE,Q5BL18_MOUSE,Q6ZQ61_MOUSE,Q4FJT0_MOUSE,	0.8	0.3	1.3	10	0.9	0.4	1.8	10	-0.2	-1.2	0.6	20	0.57746	1
SERA_MOUSE,	1	0.5	1.5	7	1.1	0.6	1.7	8	-0.2	-0.9	0.5	15	0.57764	1
LRC4C_MOUSE,	-0.3	-1.1	0.5	3	-0.6	-1.4	0.2	3	0.3	-0.8	1.5	6	0.57798	1
Q8C8K9_MOUSE,Q6QJB7_MOUSE,Q7TS86_MOUSE,Q6QJB8_MOUSE,	-1.2	-2.4	0.1	3	-1.6	-2.2	-0.9	5	0.4	-1	1.8	8	0.57845	1
Q3UFJ3_MOUSE,ODPA_MOUSE,	-5.4	-5.8	-5	19	-5.5	-5.9	-5.1	15	0.1	-0.4	0.7	34	0.58019	1
A2AFG8_MOUSE,A2AFG7_MOUSE,Q6PGJ3_MOUSE,	-1.2	-1.5	-0.9	27	-1.1	-1.4	-0.8	27	-0.1	-0.6	0.3	54	0.58044	1
ENTP2_MOUSE,Q921R1_MOUSE,Q3T9U8_MOUSE,	-1.3	-1.8	-0.8	8	-1.4	-2	-1	9	0.2	-0.5	0.9	17	0.58181	1
Q8K1M3_MOUSE,	-0.5	-1.2	0.1	10	-0.8	-1.3	-0.2	8	0.2	-0.6	1.1	18	0.58195	1
Q3UGC5_MOUSE,B2L13_MOUSE,Q543S1_MOUSE,Q3TNR7_MOUSE,	-0.8	-1.4	-0.3	8	-1	-1.7	-0.4	4	0.2	-0.6	1	12	0.58294	1
Q8K133_MOUSE,Q0PD31_MOUSE,RAB24_MOUSE,	-0.8	-1.7	0.1	4	-1.1	-2	-0.3	4	0.3	-0.9	1.6	8	0.58304	1
Q4FZK2_MOUSE,EF1G_MOUSE,	3	2.4	3.4	7	2.7	2.2	3.3	6	0.2	-0.6	0.9	13	0.58323	1
NU4M_MOUSE,Q7JCZ9_MOUSE,Q5GA75_MUSMM,B9V1K8_MOUSE,Q7JCY6_MOUSE,A3R4A0_MUSMM,Q9ME04_MOUSE,	-1.5	-1.8	-1.2	22	-1.6	-2	-1.3	19	0.1	-0.3	0.6	41	0.58334	1
MIRO1_MOUSE,	-1.2	-1.5	-0.9	24	-1.3	-1.6	-1	28	0.1	-0.3	0.5	52	0.58336	1
RAB3B_MOUSE,Q0PD62_MOUSE,	-0.2	-0.6	0.2	14	-0.4	-0.9	0.1	10	0.2	-0.5	0.8	24	0.58494	1
A2AMR5_MOUSE,Q3UVR2_MOUSE,CNTFR_MOUSE,C9K0Z6_MOUSE,	-0.7	-1.4	-0.1	5	-0.5	-1.2	0.3	4	-0.3	-1.2	0.7	9	0.58552	1
PTPRS_MOUSE,	-0.3	-0.6	0	39	-0.4	-0.7	-0.1	36	0.1	-0.3	0.5	75	0.58652	1
Q3UC51_MOUSE,Q8C4P7_MOUSE,	-0.1	-0.5	0.4	10	0.1	-0.3	0.6	10	-0.2	-0.8	0.5	20	0.58663	1
Q3UJP3_MOUSE,EMD_MOUSE,	0.2	-0.3	0.7	8	0.4	-0.1	0.9	8	-0.2	-0.9	0.5	16	0.58664	1
CNTN1_MOUSE,	-0.4	-0.6	-0.2	89	-0.3	-0.5	-0.1	78	-0.1	-0.3	0.2	167	0.58732	1
Q3UPA1_MOUSE,GNA11_MOUSE,	-0.7	-0.9	-0.4	36	-0.6	-0.9	-0.3	29	-0.1	-0.4	0.3	65	0.58752	1
Q6PAR3_MOUSE,NRP1_MOUSE,	-0.2	-0.8	0.5	7	-0.4	-1.1	0.2	7	0.2	-0.7	1.1	14	0.58845	1
Q9DC36_MOUSE,Q8CDE0_MOUSE,FLOT2_MOUSE,	-0.1	-0.6	0.4	11	-0.2	-0.6	0.1	26	0.1	-0.4	0.7	37	0.58937	1
B1AZ39_MOUSE,CHMP6_MOUSE,	-0.4	-1.2	0.4	3	-0.7	-1.4	0	3	0.3	-0.8	1.3	6	0.59071	1
KCMA1_MOUSE,C3VLD3_MOUSE,	-0.5	-1.3	0.3	4	-0.8	-1.5	0	5	0.3	-0.8	1.4	9	0.59154	1
Q4FJP8_MOUSE,Q3TPL8_MOUSE,Q8BLF7_MOUSE,GTR3_MOUSE,	0.3	-0.3	0.8	6	0.1	-0.3	0.5	12	0.2	-0.5	0.9	18	0.59158	1
B2RY66_MOUSE,B2RXR7_MOUSE,B2RY69_MOUSE,	-0.8	-1.7	0.1	3	-0.4	-1.6	0.8	2	-0.4	-1.9	1.1	5	0.59224	1
Q0VGU0_MOUSE,SAR1B_MOUSE,Q3U281_MOUSE,	-0.3	-1.3	0.7	2	0.1	-0.9	1	2	-0.4	-1.8	1	4	0.59366	1
ETFA_MOUSE,B1B1B4_MOUSE,	-3.3	-3.8	-2.8	8	-3.1	-3.6	-2.6	10	-0.2	-0.9	0.5	18	0.59434	1
Q80XU2_MOUSE,Q2M4I4_MOUSE,	-0.2	-0.8	0.5	6	0.1	-0.5	0.7	6	-0.2	-1.1	0.6	12	0.59528	1
THEM4_MOUSE,	0	-0.7	0.8	4	-0.3	-1.1	0.5	4	0.3	-0.8	1.4	8	0.59555	1
VATC1_MOUSE,	2.9	2.6	3.2	31	3	2.7	3.3	29	-0.1	-0.5	0.3	60	0.59651	1
TOM22_MOUSE,	-1.4	-1.7	-1	14	-1.5	-1.9	-1.1	10	0.1	-0.4	0.7	24	0.59656	1
UCRI_MOUSE,	-1.6	-1.8	-1.3	38	-1.7	-1.9	-1.4	33	0.1	-0.3	0.4	71	0.59671	1
TMM11_MOUSE,	-1.4	-1.9	-1	7	-1.6	-2.2	-1.1	4	0.2	-0.5	0.9	11	0.59811	1
RRAS2_MOUSE,	-1	-1.6	-0.4	6	-0.7	-1.5	0	4	-0.2	-1.2	0.7	10	0.59983	1
Q4FJX9_MOUSE,SODM_MOUSE,	-5.1	-5.5	-4.7	9	-5	-5.4	-4.5	8	-0.1	-0.7	0.4	17	0.60191	1
HNRPK_MOUSE,Q3U9Q3_MOUSE,Q3TJ38_MOUSE,B2M1R6_MOUSE,Q3U6X2_MOUSE,Q3TL71_MOUSE,Q5FWJ5_MOUSE,Q3TUA1_MOUSE,	0.5	0	1.1	7	0.7	0.1	1.5	7	-0.2	-1.1	0.6	14	0.60282	1
ATPB_MOUSE,	-4.8	-5	-4.6	87	-4.7	-4.9	-4.5	114	-0.1	-0.3	0.2	201	0.60288	1
ODPB_MOUSE,	-4.9	-5.2	-4.6	21	-5	-5.4	-4.7	22	0.1	-0.4	0.6	43	0.6059	1
SYNJ1_MOUSE,	2.3	1.9	2.7	20	2.4	2.1	2.7	25	-0.1	-0.6	0.4	45	0.6071	1
Q9CQY3_MOUSE,Q9D037_MOUSE,ATP5L_MOUSE,	-1.3	-2.1	-0.5	2	-1.6	-2.7	-0.6	2	0.3	-1	1.7	4	0.61091	1
ACSL3_MOUSE,Q8K1J7_MOUSE,	0.8	0.2	1.4	8	0.6	-0.3	1.4	9	0.2	-0.8	1.2	17	0.61239	1
Q545F8_MOUSE,Q545X8_MOUSE,Q3UXQ6_MOUSE,RS4X_MOUSE,	0.5	0.1	0.9	16	0.7	0.2	1.2	11	-0.1	-0.7	0.4	27	0.61276	1
CDC42_MOUSE,	-0.6	-1	-0.2	9	-0.5	-0.9	0	9	-0.1	-0.7	0.4	18	0.61279	1
PRAF3_MOUSE,	0.7	0.1	1.3	7	0.4	-0.2	1.3	8	0.2	-0.9	1.1	15	0.6128	1
Q3TLP8_MOUSE,Q8BPG5_MOUSE,Q9D859_MOUSE,RAC1_MOUSE,	-0.2	-0.6	0.1	11	-0.1	-0.5	0.3	10	-0.1	-0.7	0.4	21	0.61327	1
TM111_MOUSE,	0.2	-0.5	1	4	0	-0.7	0.7	3	0.3	-0.8	1.3	7	0.61475	1
B2RU82_MOUSE,ZNT9_MOUSE,	-1.8	-2.6	-1.1	6	-1.5	-2.3	-0.8	5	-0.2	-1.3	0.8	11	0.61482	1
B2RY90_MOUSE,ISC2A_MOUSE,	0.2	-0.6	1	6	-0.1	-1	0.7	4	0.3	-0.9	1.4	10	0.6158	1
MCATL_MOUSE,	-3	-4.1	-2.2	2	-3.4	-4.5	-2.5	2	0.3	-1	1.7	4	0.61597	1
GDIA_MOUSE,	-0.6	-1.5	0.2	4	-0.3	-1.1	0.4	4	-0.3	-1.4	0.9	8	0.61697	1
RB11B_MOUSE,Q78ZJ8_MOUSE,	-0.3	-0.6	0	19	-0.4	-0.7	-0.1	19	0.1	-0.3	0.5	38	0.62178	1
LPP1_MOUSE,	0.3	-0.5	1.1	2	0	-0.9	0.9	2	0.3	-0.9	1.5	4	0.62201	1
Q3UCS6_MOUSE,CD38_MOUSE,Q4FJL8_MOUSE,	-0.4	-1.1	0.2	7	-0.7	-1.4	0.1	4	0.2	-0.7	1.2	11	0.62217	1
KAPCA_MOUSE,	3	2.6	3.5	12	3.2	2.8	3.5	13	-0.1	-0.7	0.4	25	0.6222	1
RAP2B_MOUSE,Q6ZWR0_MOUSE,	-0.9	-1.4	-0.5	12	-0.8	-1.3	-0.2	8	-0.2	-0.8	0.5	20	0.62314	1
S2536_MOUSE,	-1.6	-2.5	-0.7	3	-1.9	-2.7	-1.1	4	0.3	-0.9	1.5	7	0.6234	1
B1AS67_MOUSE,	2.3	1.2	3.4	2	2	1.1	2.8	3	0.3	-1.1	1.7	5	0.62346	1
BAI2_MOUSE,B2KFH1_MOUSE,B2KFH0_MOUSE,	0	-0.7	0.7	6	-0.3	-1.2	0.6	4	0.3	-0.8	1.4	10	0.62403	1
STX18_MOUSE,	0.5	-0.4	1.3	3	0.7	-0.1	1.6	3	-0.3	-1.5	0.9	6	0.62547	1
ABCD3_MOUSE,Q3U645_MOUSE,Q91VT3_MOUSE,Q3UNS0_MOUSE,	0.1	-0.8	0.9	4	-0.2	-0.8	0.4	7	0.2	-0.8	1.3	11	0.62596	1
NIPS1_MOUSE,Q5SVF7_MOUSE,	-4.9	-5.5	-4.4	5	-4.7	-5.5	-4	5	-0.2	-1.1	0.8	10	0.62705	1
Q3USC7_MOUSE,GD1L1_MOUSE,	1.2	0.9	1.6	21	1.1	0.7	1.5	18	0.1	-0.4	0.6	39	0.63071	1
Q6NXI4_MOUSE,	2.1	1.8	2.5	24	2	1.7	2.3	23	0.1	-0.4	0.6	47	0.63256	1
Q6PGG8_MOUSE,TDRKH_MOUSE,	-1.5	-2.2	-0.8	5	-1.7	-2.4	-1	6	0.2	-0.7	1.2	11	0.63327	1
CNRP1_MOUSE,	3.4	2.7	4	4	3.1	2.3	3.9	3	0.2	-0.8	1.2	7	0.63541	1
NDRG2_MOUSE,	3.4	2.9	3.9	10	3.6	3	4.1	9	-0.2	-0.9	0.6	19	0.63572	1
HCN2_MOUSE,C9K0Z8_MOUSE,	0.1	-0.9	1.1	4	-0.2	-1.2	0.8	4	0.3	-1.1	1.7	8	0.63621	1
RAB6A_MOUSE,Q0PD54_MOUSE,	0	-0.3	0.3	18	0.1	-0.3	0.5	18	-0.1	-0.6	0.4	36	0.6375	1
ODPX_MOUSE,A2AWH6_MOUSE,	-4	-4.4	-3.5	6	-3.8	-4.3	-3.3	7	-0.2	-0.9	0.6	13	0.63824	1
Q8C2G0_MOUSE,Q3UDE9_MOUSE,FAK2_MOUSE,	1.9	1.5	2.2	22	2	1.6	2.3	24	-0.1	-0.6	0.4	46	0.63959	1
Q3UIJ0_MOUSE,Q8C5Q5_MOUSE,Q3TIJ7_MOUSE,Q3TET0_MOUSE,TCPH_MOUSE,	2.1	1.4	2.9	7	2.3	1.7	3	6	-0.2	-1.2	0.8	13	0.64151	1
Q6GTG6_MOUSE,ACSL1_MOUSE,	-0.7	-1.1	-0.3	14	-0.8	-1.3	-0.4	13	0.1	-0.5	0.7	27	0.64205	1
A2AS98_MOUSE,A1L0U6_MOUSE,A2AS97_MOUSE,NCKP1_MOUSE,	3.4	3.1	3.7	47	3.5	3.2	3.8	50	-0.1	-0.5	0.3	97	0.64212	1
Q3UH16_MOUSE,Q6P5H4_MOUSE,Q6TA13_MOUSE,	2.8	1.9	4.2	12	2.6	1.8	3.3	10	0.3	-0.9	1.8	22	0.64274	1
A2CG14_MOUSE,RALA_MOUSE,	-0.8	-1.1	-0.4	14	-0.7	-1.1	-0.3	12	-0.1	-0.6	0.4	26	0.6442	1
DPYL1_MOUSE,Q6P1J1_MOUSE,Q3TXY0_MOUSE,	-0.5	-1.2	0.2	9	-0.7	-1.4	0	5	0.2	-0.8	1.2	14	0.64441	1
PX11B_MOUSE,	0.9	0.2	1.6	4	0.6	-0.1	1.5	3	0.2	-0.8	1.3	7	0.64466	1
Q0VAV5_MOUSE,	0	-0.8	0.8	3	0.2	-0.5	1	3	-0.2	-1.3	0.8	6	0.64468	1
SNP25_MOUSE,	-0.2	-0.4	0	40	-0.3	-0.5	0	34	0.1	-0.3	0.4	74	0.64512	1
A2APW8_MOUSE,SNAB_MOUSE,	1.1	0.7	1.4	25	1.2	0.9	1.5	27	-0.1	-0.5	0.4	52	0.64548	1
Q0PD63_MOUSE,RAB3A_MOUSE,	-0.1	-0.4	0.1	59	-0.2	-0.4	0	54	0.1	-0.2	0.4	113	0.64794	1
NDUS7_MOUSE,	-3.8	-4.1	-3.4	11	-3.7	-4.1	-3.2	7	-0.1	-0.7	0.4	18	0.64822	1
ARL8A_MOUSE,	0	-0.5	0.4	12	0.1	-0.4	0.5	11	-0.1	-0.7	0.5	23	0.65196	1
ATPG_MOUSE,Q8C2Q8_MOUSE,A2AKU9_MOUSE,Q3UD06_MOUSE,Q9D9D7_MOUSE,	-2.8	-3.2	-2.5	17	-2.8	-3.1	-2.5	20	-0.1	-0.5	0.3	37	0.65228	1
Q5J7N1_MOUSE,	-0.6	-1	-0.1	8	-0.4	-0.8	0	8	-0.1	-0.7	0.5	16	0.65283	1
H4_MOUSE,B2RTM0_MOUSE,	1.8	1.3	2.3	11	1.7	1.2	2.2	8	0.1	-0.5	0.8	19	0.65335	1
A2RRK1_MOUSE,	-0.6	-1.3	0.1	5	-0.8	-1.4	-0.1	6	0.2	-0.7	1.1	11	0.6539	1
Q8BG33_MOUSE,Q3TYC2_MOUSE,NTRI_MOUSE,	-0.7	-1.1	-0.4	22	-0.8	-1.2	-0.5	19	0.1	-0.4	0.5	41	0.65403	1
RAB6B_MOUSE,Q0PD53_MOUSE,	-0.1	-0.4	0.2	20	0	-0.4	0.3	18	-0.1	-0.5	0.4	38	0.65422	1
H2A2A_MOUSE,Q149V4_MOUSE,H2A2C_MOUSE,B2RWH3_MOUSE,Q64426_MOUSE,	1.8	1.3	2.4	7	2	1.4	2.8	5	-0.2	-1.1	0.7	12	0.6554	1
Q6PD28_MOUSE,Q3V3S8_MOUSE,	1.7	0.8	2.8	3	2	1.3	2.9	3	-0.3	-1.6	1.1	6	0.658	1
TF_MOUSE,	-0.4	-1.2	0.5	3	-0.7	-1.7	0.4	3	0.3	-1	1.6	6	0.65812	1
Q3TMZ1_MOUSE,P5CR2_MOUSE,	-1.7	-2.5	-0.9	6	-1.5	-2.2	-0.8	6	-0.2	-1.3	0.8	12	0.65838	1
B2RWT9_MOUSE,PLXB1_MOUSE,	-0.8	-1.9	0.3	3	-1.1	-1.8	-0.4	7	0.3	-1	1.5	10	0.66033	1
GSTM1_MOUSE,	0.8	0.1	1.4	6	0.6	-0.1	1.3	4	0.2	-0.7	1.1	10	0.66085	1
B2RVN8_MOUSE,F163B_MOUSE,	0.5	-0.3	1.4	3	0.3	-0.4	1	4	0.2	-0.8	1.3	7	0.66188	1
PLXA1_MOUSE,	-0.6	-1	-0.3	24	-0.7	-1.1	-0.4	23	0.1	-0.4	0.6	47	0.66203	1
Q8BUN9_MOUSE,	0.8	0.2	1.5	5	0.6	-0.1	1.3	4	0.2	-0.8	1.2	9	0.66235	1
Q9CXU4_MOUSE,TIM23_MOUSE,	-1.6	-2.4	-0.7	2	-1.8	-2.7	-1	3	0.3	-0.9	1.4	5	0.6624	1
Q3U3X8_MOUSE,OXA1L_MOUSE,Q3TC56_MOUSE,Q3UTE7_MOUSE,	-1.4	-2.2	-0.6	4	-1.6	-2.4	-0.8	2	0.2	-0.9	1.3	6	0.66667	1
EIF3A_MOUSE,	2.2	1.8	2.7	10	2.1	1.6	2.6	11	0.1	-0.6	0.8	21	0.66785	1
Q0P5W2_MOUSE,TMX4_MOUSE,	0.4	-0.2	1	7	0.2	-0.4	0.8	7	0.2	-0.7	1	14	0.66806	1
RLA0_MOUSE,Q5M8R8_MOUSE,	1.2	0.8	1.5	15	1.3	0.9	1.6	14	-0.1	-0.6	0.4	29	0.66822	1
PYRD_MOUSE,	-1.4	-1.8	-1	13	-1.5	-1.9	-1.2	14	0.1	-0.4	0.6	27	0.66837	1
B2RUR3_MOUSE,MDR1_MOUSE,MDR3_MOUSE,	-1.2	-1.9	-0.4	5	-0.9	-1.9	0.1	3	-0.3	-1.5	1	8	0.6699	1
Q564E8_MOUSE,RL4_MOUSE,	0.7	0.2	1.1	13	0.8	0.3	1.3	10	-0.1	-0.8	0.5	23	0.67109	1
CAH14_MOUSE,	-0.9	-1.9	0.1	2	-0.6	-1.8	0.6	2	-0.3	-1.8	1.2	4	0.67121	1
Q5M9M0_MOUSE,RL13A_MOUSE,	0.3	-0.6	1.2	4	0	-1.1	1.2	2	0.3	-1.1	1.7	6	0.67159	1
CS052_MOUSE,	-1.4	-1.7	-1	17	-1.5	-1.9	-1	9	0.1	-0.4	0.7	26	0.6718	1
Q5M9J8_MOUSE,Q5M9N5_MOUSE,RL28_MOUSE,	0.3	-0.7	1.2	2	0.5	-0.4	1.5	2	-0.3	-1.6	1.1	4	0.67225	1
NTRK2_MOUSE,	-0.4	-0.9	0	14	-0.6	-1	-0.1	13	0.1	-0.5	0.7	27	0.67241	1
ESYT2_MOUSE,	0.3	-0.8	1.2	3	0	-1.1	1	7	0.3	-1.2	1.7	10	0.67247	1
ARMC1_MOUSE,	0.7	0	1.5	4	0.9	0.3	1.6	4	-0.2	-1.2	0.8	8	0.67459	1
CCHL_MOUSE,Q8BP79_MOUSE,Q6P5G5_MOUSE,	-1.9	-2.6	-1.1	5	-2	-2.8	-1.4	4	0.2	-0.8	1.2	9	0.67521	1
Q91YS9_MOUSE,EPHB3_MOUSE,	0.6	-0.1	1.3	5	0.4	-0.2	0.9	6	0.2	-0.7	1.1	11	0.67706	1
SYIM_MOUSE,	-1.2	-1.6	-0.7	17	-1.3	-1.7	-0.9	18	0.1	-0.4	0.7	35	0.67794	1
MPP2_MOUSE,B1AQF9_MOUSE,	0.5	-0.4	1.5	4	0.2	-0.5	1	5	0.2	-0.9	1.5	9	0.67879	1
CC90B_MOUSE,	-1.1	-2	-0.2	3	-1.4	-2.1	-0.6	4	0.2	-0.9	1.4	7	0.67944	1
Q3U232_MOUSE,Q3U1N0_MOUSE,COR1A_MOUSE,	3	2.5	3.4	8	3.1	2.6	3.7	12	-0.1	-0.9	0.5	20	0.67983	1
VAPB_MOUSE,Q8BH80_MOUSE,	0.3	-0.2	0.7	11	0.1	-0.4	0.7	8	0.1	-0.5	0.8	19	0.68009	1
Q543Q4_MOUSE,RAB3D_MOUSE,	-0.2	-0.6	0.2	14	-0.3	-0.7	0.2	10	0.1	-0.5	0.7	24	0.68067	1
STXB5_MOUSE,	0.2	-0.3	0.8	10	0.1	-0.5	0.7	9	0.2	-0.6	0.9	19	0.68394	1
Q3TX25_MOUSE,Q3U3J9_MOUSE,AL3B1_MOUSE,	-0.8	-2.2	0.2	4	-0.6	-1.3	0.2	7	-0.3	-1.9	1	11	0.68479	1
Q3TXV4_MOUSE,RAB31_MOUSE,	-0.5	-1.1	0.1	7	-0.3	-0.9	0.3	6	-0.2	-1	0.7	13	0.68493	1
GRIK2_MOUSE,A3KMF0_MOUSE,A3KMF1_MOUSE,	-1.1	-1.9	-0.3	4	-1.3	-2	-0.6	4	0.2	-0.8	1.3	8	0.68526	1
HNRH2_MOUSE,A2BDV8_MOUSE,Q8C2Q7_MOUSE,Q811L7_MOUSE,HNRH1_MOUSE,	0.7	-0.2	1.6	2	0.5	-0.3	1.3	2	0.2	-1	1.5	4	0.68736	1
BAT3_MOUSE,Q3UF95_MOUSE,	1.4	0.8	2	6	1.6	1	2.2	7	-0.2	-1	0.6	13	0.68977	1
RL13_MOUSE,	0	-0.6	0.5	7	0.1	-0.4	0.6	11	-0.1	-0.9	0.6	18	0.69007	1
ASTN1_MOUSE,Q3UHD7_MOUSE,	-0.3	-0.7	0.2	14	-0.4	-0.9	0.1	16	0.1	-0.5	0.7	30	0.69206	1
Q3V3K6_MOUSE,PIGS_MOUSE,Q3V307_MOUSE,	0.3	-0.3	0.9	7	0.1	-0.6	0.8	5	0.2	-0.7	1.1	12	0.69277	1
EXOG_MOUSE,	-1.5	-1.8	-1.1	19	-1.5	-1.8	-1.2	19	0.1	-0.3	0.5	38	0.694	1
Q4FK22_MOUSE,ERGI1_MOUSE,Q69ZP5_MOUSE,	0.4	0	0.9	8	0.3	-0.2	0.9	9	0.1	-0.6	0.8	17	0.69669	1
Q14AY1_MOUSE,	0.8	0.3	1.3	8	0.6	0.1	1.2	6	0.1	-0.6	0.9	14	0.6973	1
Q91V35_MOUSE,	-0.6	-1	-0.2	19	-0.7	-1	-0.3	19	0.1	-0.4	0.6	38	0.69732	1
TIM50_MOUSE,	-2.3	-2.6	-1.9	18	-2.3	-2.7	-2	19	0.1	-0.3	0.5	37	0.69829	1
Q8R0Q6_MOUSE,TSN7_MOUSE,B1AUD0_MOUSE,Q6PDN6_MOUSE,	-0.3	-0.8	0.2	9	-0.4	-0.8	0	13	0.1	-0.5	0.8	22	0.6998	1
APMAP_MOUSE,	0.6	0	1.1	7	0.4	-0.2	1	8	0.2	-0.6	0.9	15	0.69995	1
B1B1C8_MOUSE,KPCE_MOUSE,	1.2	0.7	1.7	10	1.3	0.9	1.7	16	-0.1	-0.7	0.5	26	0.7025	1
Q6DIC7_MOUSE,	2	1.7	2.3	42	2	1.6	2.3	31	0.1	-0.4	0.5	73	0.70257	1
A1BN54_MOUSE,	3.1	2.8	3.5	25	3.2	2.8	3.6	35	-0.1	-0.6	0.5	60	0.70317	1
Q5SX58_MOUSE,Q4FK59_MOUSE,ENOB_MOUSE,	2.1	1.6	2.5	11	1.9	1.4	2.4	8	0.1	-0.5	0.8	19	0.70393	1
S4A8_MOUSE,	-0.7	-1.4	0.1	4	-0.5	-1.3	0.3	5	-0.2	-1.2	0.8	9	0.70462	1
Q8CBF8_MOUSE,KCNA4_MOUSE,	-0.1	-0.8	0.5	6	0	-0.6	0.7	6	-0.2	-1.1	0.7	12	0.70526	1
Q8BTN5_MOUSE,Q3U262_MOUSE,B7ZP07_MOUSE,Q7M764_MOUSE,	-1.6	-2.3	-0.8	4	-1.3	-2.3	-0.4	4	-0.2	-1.4	1	8	0.70668	1
Q5PPQ7_MOUSE,COR1C_MOUSE,Q499X7_MOUSE,	3.9	2.9	4.6	5	3.7	2.9	4.5	9	0.2	-1.1	1.2	14	0.70895	1
AGAP2_MOUSE,	0.9	0.6	1.2	36	1	0.7	1.3	32	-0.1	-0.4	0.3	68	0.71099	1
SEPT5_MOUSE,	2.8	2.4	3.3	9	2.7	2.3	3.2	13	0.1	-0.5	0.7	22	0.71101	1
S2542_MOUSE,	-1.5	-2	-1.1	11	-1.6	-2.1	-1.2	10	0.1	-0.5	0.7	21	0.71299	1
B1AWN6_MOUSE,	0.3	-0.6	1.1	5	0	-0.7	0.9	5	0.2	-1	1.3	10	0.71309	1
PLPP_MOUSE,	2.4	2	3	10	2.3	1.9	2.8	7	0.1	-0.6	0.8	17	0.71366	1
USO1_MOUSE,	1.8	1.2	2.3	9	1.9	1.4	2.4	11	-0.1	-0.9	0.6	20	0.71585	1
RAB21_MOUSE,Q6A0C7_MOUSE,Q0PD35_MOUSE,	-0.6	-1.2	0.1	9	-0.7	-1.5	0	6	0.2	-0.8	1.1	15	0.71944	1
ABCB8_MOUSE,	-1.1	-1.5	-0.7	18	-1.2	-1.5	-0.8	19	0.1	-0.4	0.5	37	0.71973	1
PURA_MOUSE,	1.2	0.7	1.7	7	1.3	0.8	1.8	10	-0.1	-0.8	0.6	17	0.722	1
ALG2_MOUSE,	0.5	0.1	0.9	13	0.4	-0.1	0.8	11	0.1	-0.5	0.7	24	0.72358	1
Q3TV94_MOUSE,Q52PE3_MOUSE,SSRA_MOUSE,	0.2	-0.6	1.1	3	0	-0.7	0.8	3	0.2	-0.9	1.3	6	0.72509	1
Q8BJL4_MOUSE,LMAN2_MOUSE,	0.4	-0.1	0.9	10	0.3	-0.3	0.9	6	0.1	-0.6	0.8	16	0.72642	1
GDIR1_MOUSE,	3.7	3.2	4.2	10	3.8	3.3	4.3	9	-0.1	-0.8	0.6	19	0.72644	1
NDUS3_MOUSE,	-5.3	-5.7	-4.9	13	-5.2	-5.7	-4.7	11	-0.1	-0.7	0.5	24	0.72807	1
C1IE02_MOUSE,REEP2_MOUSE,	0.5	-0.4	1.3	2	0.3	-0.6	1.1	3	0.2	-1	1.4	5	0.72825	1
A2AKT7_MOUSE,XPO1_MOUSE,	1.4	1	1.8	19	1.5	1.1	1.9	17	-0.1	-0.6	0.4	36	0.72837	1
RS8_MOUSE,Q497E9_MOUSE,	1.4	0.9	2	6	1.3	0.7	1.9	4	0.1	-0.6	0.9	10	0.72961	1
Q544B1_MOUSE,ALDH2_MOUSE,Q3U6I3_MOUSE,Q3UJW1_MOUSE,Q3TVM2_MOUSE,Q3U9J7_MOUSE,	-4.9	-5.4	-4.4	13	-4.8	-5.2	-4.3	10	-0.1	-0.7	0.5	23	0.72971	1
EXOC8_MOUSE,	1.6	1.1	2.1	7	1.8	1.1	2.4	12	-0.1	-1	0.7	19	0.73025	1
Q3UF82_MOUSE,MK01_MOUSE,	2.9	2.5	3.3	18	2.8	2.5	3.2	14	0.1	-0.4	0.6	32	0.73134	1
DHRS1_MOUSE,	-0.3	-0.9	0.4	12	-0.4	-1	0.1	10	0.1	-0.7	1	22	0.73318	1
Q8K596_MOUSE,Q68EG0_MOUSE,	0.8	0.6	1	68	0.7	0.5	1	59	0.1	-0.2	0.3	127	0.73362	1
Q3TMQ7_MOUSE,ZNT3_MOUSE,Q6NZC3_MOUSE,	1	0.4	1.7	6	0.9	0.5	1.4	10	0.1	-0.6	0.9	16	0.7348	1
A3R459_MUSMC,A3E4B4_MOUSE,A3R485_MOUSE,NU3M_MOUSE,Q5GA77_MUSMM,Q7GIP5_MOUSE,	-1.6	-2.5	-0.7	3	-1.8	-2.8	-0.8	2	0.2	-1.1	1.6	5	0.73481	1
RALB_MOUSE,Q8CCG5_MOUSE,	-0.7	-1.3	-0.2	7	-0.6	-1.2	0	5	-0.1	-0.9	0.7	12	0.73526	1
ABD12_MOUSE,	0.7	0.3	1.1	19	0.8	0.4	1.2	18	-0.1	-0.6	0.4	37	0.73548	1
RMND1_MOUSE,	-1.3	-1.8	-0.8	12	-1.4	-1.9	-0.9	9	0.1	-0.6	0.8	21	0.73555	1
Q14BH8_MOUSE,	-0.2	-0.4	0.1	52	-0.2	-0.4	0	49	0.1	-0.2	0.4	101	0.73617	1
Q505E1_MOUSE,Q3TRI5_MOUSE,PISD_MOUSE,	-1	-1.8	-0.2	4	-0.8	-1.7	0	2	-0.2	-1.4	1	6	0.74109	1
SAC1_MOUSE,	0.2	-0.2	0.7	11	0.3	-0.2	0.9	7	-0.1	-0.8	0.6	18	0.74214	1
PO210_MOUSE,	-0.9	-2	0.2	3	-1.1	-2.1	-0.1	2	0.2	-1.3	1.7	5	0.74262	1
TCPG_MOUSE,Q3U4U6_MOUSE,	1.3	0.8	1.9	8	1.2	0.6	2	9	0.1	-0.8	1	17	0.74318	1
EFR3B_MOUSE,	0	-0.5	0.5	11	-0.1	-0.6	0.4	13	0.1	-0.5	0.7	24	0.7434	1
Q3UZJ4_MOUSE,2A5E_MOUSE,	1.5	1	2.1	7	1.6	1.2	2.2	8	-0.1	-0.8	0.6	15	0.7436	1
MDHC_MOUSE,	-0.3	-0.7	0.1	12	-0.2	-0.7	0.2	11	-0.1	-0.7	0.5	23	0.74528	1
PRDX2_MOUSE,	-0.4	-1	0.2	6	-0.2	-1	0.5	5	-0.2	-1.1	0.8	11	0.74778	1
MYH9_MOUSE,	3.1	2.7	3.4	40	3.2	2.7	3.6	27	-0.1	-0.6	0.5	67	0.74836	1
MMSA_MOUSE,	-1.1	-1.6	-0.7	8	-1.3	-2	-0.5	6	0.1	-0.7	1	14	0.75024	1
RAB1B_MOUSE,Q0PD66_MOUSE,Q3V3C2_MOUSE,	-0.7	-1	-0.4	27	-0.8	-1.1	-0.5	22	0.1	-0.3	0.5	49	0.75353	1
Q99JZ4_MOUSE,Q3TXJ4_MOUSE,	0	-0.8	0.8	4	0.2	-0.6	1	3	-0.2	-1.3	0.9	7	0.75362	1
NRX1A_MOUSE,	-0.2	-0.5	0.2	21	-0.2	-0.6	0.1	18	0.1	-0.4	0.6	39	0.75399	1
Q6P1F7_MOUSE,Q8VI14_MOUSE,Q9D393_MOUSE,Q6P1Z8_MOUSE,	-0.6	-1.1	-0.1	9	-0.8	-1.9	0.3	2	0.2	-1	1.4	11	0.75534	1
Q3UJH8_MOUSE,AATC_MOUSE,	-1.1	-1.8	-0.5	7	-1.3	-1.9	-0.6	7	0.1	-0.7	1	14	0.7558	1
DPP10_MOUSE,	-0.7	-1.1	-0.4	23	-0.7	-1	-0.3	21	-0.1	-0.5	0.4	44	0.75599	1
Q91VA7_MOUSE,	-3.1	-3.3	-2.8	46	-3.1	-3.4	-2.9	29	0.1	-0.3	0.4	75	0.75899	1
Q8C2A3_MOUSE,SEPT7_MOUSE,	1.5	1.2	1.8	24	1.5	1.2	1.9	18	-0.1	-0.5	0.4	42	0.75908	1
Q6GQT9_MOUSE,	-0.1	-0.7	0.4	13	-0.3	-0.8	0.3	8	0.1	-0.7	0.9	21	0.76128	1
Q3UCT9_MOUSE,Q3TVJ0_MOUSE,ITM2B_MOUSE,Q9D1Q3_MOUSE,	0.3	-0.2	0.8	8	0.4	-0.2	1	7	-0.1	-0.9	0.6	15	0.76158	1
PRR7_MOUSE,B2RSG4_MOUSE,	-0.8	-1.7	0.1	2	-1	-1.6	-0.3	4	0.2	-0.9	1.2	6	0.76174	1
RAC3_MOUSE,Q14A12_MOUSE,	-0.5	-1.1	0.1	5	-0.3	-1	0.3	4	-0.1	-1	0.7	9	0.76202	1
CADM2_MOUSE,	0	-0.3	0.2	38	-0.1	-0.3	0.2	37	0.1	-0.3	0.4	75	0.76309	1
LPPR4_MOUSE,	0.4	0.1	0.7	22	0.3	0	0.7	20	0.1	-0.4	0.5	42	0.7659	1
DCE2_MOUSE,Q548L4_MOUSE,	1.2	0.3	2.3	3	1	0.3	1.8	3	0.2	-1	1.5	6	0.76604	1
RBGPR_MOUSE,	0.9	0.3	1.5	10	1.2	0.2	2.1	10	-0.2	-1.3	0.9	20	0.76638	1
Q3UCH0_MOUSE,RL6_MOUSE,	0.8	0.5	1.2	13	0.9	0.5	1.4	9	-0.1	-0.7	0.5	22	0.76886	1
MO2R2_MOUSE,	3.2	2.6	3.9	4	3	2.2	4.1	3	0.2	-1.1	1.2	7	0.7695	1
C7G3P1_MOUSE,B8QI35_MOUSE,	2.4	1.9	3.1	16	2.4	1.9	2.9	14	0.1	-0.6	0.9	30	0.7697	1
NDRG4_MOUSE,	2.6	1.7	3.2	4	2.7	1.9	3.5	2	-0.2	-1.4	0.9	6	0.76997	1
Q549X4_MOUSE,RB27B_MOUSE,	0	-1	1	3	-0.2	-1.2	0.7	4	0.2	-1.2	1.6	7	0.7723	1
Q4FJR4_MOUSE,PDK3_MOUSE,	-1.5	-2.4	-0.5	2	-1.3	-1.9	-0.7	6	-0.2	-1.3	1	8	0.77249	1
Q8BG11_MOUSE,Q8VDK4_MOUSE,CAD13_MOUSE,	-1.4	-2.3	-0.6	3	-1.6	-2.2	-1	5	0.2	-0.9	1.2	8	0.77323	1
DHB8_MOUSE,Q5M9K0_MOUSE,	0.3	-0.3	1	5	0.5	-0.4	1.7	4	-0.2	-1.5	1	9	0.77469	1
GABR2_MOUSE,	0	-0.8	0.8	5	-0.2	-1	0.6	5	0.2	-0.9	1.3	10	0.7751	1
Q3MIA8_MOUSE,CSN1_MOUSE,	1.8	0.9	3.1	4	2.1	1.4	2.8	7	-0.2	-1.3	1.2	11	0.77757	1
RAB4B_MOUSE,Q4V9W8_MOUSE,	-0.2	-0.8	0.4	6	-0.3	-1.1	0.4	5	0.1	-0.8	1.1	11	0.77786	1
B1AQE0_MOUSE,ALDOC_MOUSE,	-1.1	-1.8	-0.3	4	-0.9	-1.6	-0.3	6	-0.1	-1.1	0.8	10	0.77925	1
SE1L1_MOUSE,Q5DTL8_MOUSE,Q6GTY4_MOUSE,	0	-1	1.1	3	-0.1	-0.9	0.6	4	0.2	-1.1	1.4	7	0.77929	1
Q0VGN4_MOUSE,	0.7	-0.1	1.4	8	0.5	-0.1	1.1	7	0.1	-0.8	1.1	15	0.77991	1
CAB39_MOUSE,Q8VDZ8_MOUSE,	2.9	2.5	3.4	9	2.8	2.2	3.4	9	0.1	-0.6	0.9	18	0.77997	1
Q14AG7_MOUSE,SYT12_MOUSE,	0.6	0	1.2	9	0.5	-0.2	1.1	6	0.1	-0.7	1	15	0.77998	1
SNG3_MOUSE,	0.8	0.3	1.4	7	0.7	0.2	1.2	8	0.1	-0.6	0.8	15	0.78096	1
NBEA_MOUSE,	2	1.4	2.7	5	2.1	1.5	2.8	6	-0.1	-1	0.8	11	0.78135	1
A2AUA8_MOUSE,Q7TQG7_MOUSE,ADA11_MOUSE,Q3TZE2_MOUSE,	-0.5	-1.8	0.8	2	-0.3	-1.1	0.4	7	-0.2	-1.7	1.3	9	0.78331	1
Q3TED2_MOUSE,Q80Y09_MOUSE,B8JJL8_MOUSE,	1.7	1	2.6	5	1.8	1.3	2.3	9	-0.1	-1	0.9	14	0.78346	1
Q3TWJ4_MOUSE,Q3ULF7_MOUSE,ARP3_MOUSE,	1.5	1	2.1	8	1.6	1	2.3	6	-0.1	-0.9	0.8	14	0.7846	1
MFTC_MOUSE,Q3T9D8_MOUSE,Q8K0B7_MOUSE,Q3UM21_MOUSE,	-1	-1.8	-0.3	4	-1.2	-2.3	-0.3	5	0.2	-1	1.5	9	0.78486	1
K1688_MOUSE,	0.4	0	0.8	19	0.3	-0.1	0.7	16	0.1	-0.5	0.6	35	0.78519	1
TRIO_MOUSE,	0.6	0	1.2	13	0.7	0	1.3	10	-0.1	-1	0.8	23	0.78543	1
FAF2_MOUSE,	-0.7	-1.8	0.4	3	-0.9	-1.7	-0.1	5	0.2	-1.2	1.5	8	0.7856	1
Q3UBU0_MOUSE,	1.5	0.8	2.2	9	1.3	0.6	2.3	10	0.1	-1	1.2	19	0.78656	1
AP1G1_MOUSE,Q3UKX8_MOUSE,Q8CBB7_MOUSE,	1.6	1.1	2.2	8	1.5	1.1	2	13	0.1	-0.6	0.8	21	0.78659	1
EFR3A_MOUSE,	0	-0.7	0.7	6	-0.2	-1	0.6	4	0.2	-0.9	1.2	10	0.78665	1
A2A6U3_MOUSE,SEPT9_MOUSE,	3	2.2	4.1	3	3.3	2.2	4.4	2	-0.2	-1.6	1.4	5	0.78684	1
Q3ULL9_MOUSE,	-2.1	-2.6	-1.6	10	-2.2	-2.7	-1.7	10	0.1	-0.6	0.8	20	0.78686	1
GRM5_MOUSE,B2BH30_MOUSE,	0.5	-0.2	1.2	8	0.4	-0.3	1.1	6	0.1	-0.8	1.1	14	0.78756	1
Q3UW40_MOUSE,RL24_MOUSE,	0.2	-0.7	1.2	2	0.4	-0.5	1.3	3	-0.2	-1.5	1.1	5	0.7891	1
SRR_MOUSE,	3.2	2.7	3.9	7	3.4	2.7	4.2	6	-0.1	-1.1	0.8	13	0.7898	1
EF1A2_MOUSE,	2.8	2.4	3.2	17	2.9	2.5	3.3	19	-0.1	-0.6	0.4	36	0.79004	1
CC132_MOUSE,	1.3	0.9	2.5	9	1.6	0.9	2.3	7	-0.1	-1.1	1.6	16	0.79085	1
D2KHZ9_MOUSE,G3P_MOUSE,	0.9	0.6	1.1	57	0.8	0.6	1.1	50	0.1	-0.3	0.4	107	0.79201	1
LDHB_MOUSE,	-0.8	-1.2	-0.4	10	-0.7	-1.1	-0.3	15	-0.1	-0.6	0.5	25	0.79217	1
Q3TX70_MOUSE,Q3UA21_MOUSE,STX6_MOUSE,	0.7	0.1	1.3	7	0.6	-0.1	1.3	5	0.1	-0.8	1.1	12	0.79413	1
MAN1_MOUSE,	-0.2	-1	0.6	3	-0.3	-1	0.3	5	0.1	-0.9	1.2	8	0.79794	1
Q6P716_MOUSE,Q76LV5_MOUSE,RASH_MOUSE,	-0.7	-1.2	-0.3	9	-0.7	-1.1	-0.2	7	-0.1	-0.7	0.5	16	0.79884	1
DHX9_MOUSE,	2.4	1.7	2.9	14	2.4	1.9	2.9	14	-0.1	-0.9	0.7	28	0.79934	1
Q99L64_MOUSE,Q99PH4_MOUSE,Q99PH3_MOUSE,B1ATI0_MOUSE,Q3U7B5_MOUSE,Q8C5J1_MOUSE,AL3A2_MOUSE,Q8C3C9_MOUSE,Q8BQ93_MOUSE,B1AV77_MOUSE,	-0.5	-1.1	0.1	8	-0.6	-1.3	0.1	6	0.1	-0.8	1	14	0.80013	1
Q8VBV0_MOUSE,B9EJA3_MOUSE,Q8R169_MOUSE,	-0.4	-0.7	0	21	-0.4	-0.8	-0.1	19	0.1	-0.4	0.5	40	0.8012	1
A2AMQ4_MOUSE,CDS2_MOUSE,	0.8	0.4	1.3	14	0.7	0.3	1.2	14	0.1	-0.5	0.7	28	0.80275	1
Q8BNF8_MOUSE,TERA_MOUSE,	0.3	-0.4	1.1	6	0.4	-0.2	1.1	8	-0.1	-1	0.8	14	0.80339	1
BRI3B_MOUSE,	0.1	-0.6	0.7	4	0.2	-0.5	0.9	3	-0.1	-1.1	0.9	7	0.80378	1
LMNB1_MOUSE,	-1.4	-2	-0.7	5	-1.2	-2.1	-0.4	2	-0.1	-1.1	0.9	7	0.8092	1
A5XDA7_MOUSE,ROCK2_MOUSE,	2.7	2.1	3.4	11	2.8	1.7	4	8	-0.1	-1.4	1.2	19	0.81115	1
GDE1_MOUSE,	0.5	-0.1	1	7	0.4	-0.2	1	6	0.1	-0.7	0.8	13	0.81116	1
Q14BZ3_MOUSE,LXN_MOUSE,	1.6	0.9	2.3	4	1.7	0.8	2.6	3	-0.1	-1.3	1	7	0.81193	1
KTN1_MOUSE,	0.8	0.1	1.6	5	0.9	0.3	1.5	6	-0.1	-1	0.8	11	0.81308	1
B6ZHC9_MOUSE,A2AUK5_MOUSE,	2.4	2.1	2.9	20	2.4	2	2.8	20	0.1	-0.5	0.6	40	0.81332	1
Q3TL79_MOUSE,AHSA1_MOUSE,	1.4	0.9	1.9	11	1.3	0.8	1.8	9	0.1	-0.6	0.8	20	0.8139	1
Q52KC1_MOUSE,IF4A2_MOUSE,	2.2	1.8	2.8	11	2.3	1.8	2.9	12	-0.1	-0.8	0.6	23	0.8142	1
SC22B_MOUSE,	0.6	0.1	1	13	0.5	0	1	10	0.1	-0.6	0.7	23	0.81474	1
DAB2P_MOUSE,B7ZD30_MOUSE,A2AUX3_MOUSE,A2AUX5_MOUSE,	-0.2	-1	0.6	2	-0.1	-1	0.8	3	-0.1	-1.3	1	5	0.81594	1
NCAM2_MOUSE,	-1.4	-1.7	-1	21	-1.3	-1.7	-1	18	-0.1	-0.5	0.4	39	0.8179	1
RAB4A_MOUSE,B2RRN5_MOUSE,Q3TSQ6_MOUSE,Q3ULK1_MOUSE,	0	-0.9	1	3	-0.1	-1.3	1	2	0.2	-1.3	1.7	5	0.81801	1
A6H5Z3_MOUSE,	2	1.2	2.9	5	1.8	1.1	2.5	6	0.1	-0.9	1.3	11	0.82117	1
Q9JM86_MOUSE,	0.8	0.1	1.4	7	0.7	-0.1	1.4	5	0.1	-0.9	1.1	12	0.82158	1
FXYD6_MOUSE,	-1.1	-1.9	-0.2	4	-1	-1.5	-0.4	6	-0.1	-1.1	0.9	10	0.8228	1
RL18A_MOUSE,Q3THJ0_MOUSE,	-0.2	-0.7	0.4	6	-0.1	-0.7	0.6	4	-0.1	-0.9	0.7	10	0.8247	1
Q3U026_MOUSE,Q3UME9_MOUSE,MOGS_MOUSE,	0.1	-0.6	0.9	4	0	-0.8	0.8	3	0.1	-0.9	1.2	7	0.82729	1
RGRF1_MOUSE,B2RS27_MOUSE,	2.1	1.5	2.9	11	2	1.6	2.6	9	0.1	-0.7	1	20	0.82792	1
PRS4_MOUSE,Q542I9_MOUSE,	0.7	-0.3	1.8	2	0.9	0	1.7	3	-0.1	-1.5	1.2	5	0.82795	1
Q3T9U9_MOUSE,Q91VJ6_MOUSE,Q3UB67_MOUSE,Q3UB90_MOUSE,Q3UB15_MOUSE,	0.5	-0.1	1.1	5	0.6	0.1	1.1	8	-0.1	-0.9	0.7	13	0.82938	1
RHOB_MOUSE,Q4FJM5_MOUSE,	-0.9	-1.3	-0.5	13	-0.9	-1.3	-0.4	14	-0.1	-0.6	0.5	27	0.83031	1
DPOE4_MOUSE,	-0.3	-0.9	0.4	3	-0.1	-1.1	0.8	2	-0.1	-1.3	1	5	0.83736	1
Q0PD49_MOUSE,RAB8B_MOUSE,	0.3	-0.2	0.8	8	0.2	-0.3	0.7	9	0.1	-0.6	0.8	17	0.83891	1
B2RS41_MOUSE,SSDH_MOUSE,	-5.2	-5.7	-4.8	12	-5.2	-5.5	-4.8	17	-0.1	-0.6	0.5	29	0.8391	1
CARKD_MOUSE,	-2.7	-3.3	-2.1	5	-2.8	-3.6	-2.1	7	0.1	-0.9	1.1	12	0.83935	1
ITM2C_MOUSE,	0.2	-0.6	1	4	0.3	-0.5	1.1	3	-0.1	-1.2	1	7	0.84035	1
IGSF8_MOUSE,	0.1	-0.2	0.5	23	0.2	-0.1	0.5	31	-0.1	-0.5	0.4	54	0.84105	1
GABT_MOUSE,	-4.5	-4.8	-4.1	15	-4.4	-4.8	-4	14	-0.1	-0.6	0.5	29	0.84125	1
BAT5_MOUSE,	-0.2	-0.7	0.3	9	-0.2	-1	0.5	6	0.1	-0.8	0.9	15	0.84137	1
AQP4_MOUSE,Q50H70_MOUSE,Q8BR89_MOUSE,	-0.2	-1	0.5	4	-0.3	-1.2	0.6	3	0.1	-1.1	1.3	7	0.84174	1
TM143_MOUSE,	-1.2	-1.9	-0.6	8	-1.3	-2	-0.7	5	0.1	-0.9	1	13	0.84192	1
Q2TJI9_MOUSE,	0.1	-0.3	0.6	15	0	-0.5	0.6	11	0.1	-0.6	0.7	26	0.84267	1
SCPDH_MOUSE,	-0.9	-1.3	-0.5	14	-0.9	-1.3	-0.5	12	0.1	-0.5	0.6	26	0.84466	1
S2540_MOUSE,	-1.9	-2.5	-1.3	6	-2	-2.6	-1.3	5	0.1	-0.8	0.9	11	0.8463	1
B2RPS1_MOUSE,RAB5B_MOUSE,Q0PD56_MOUSE,	-0.3	-0.7	0.1	13	-0.2	-0.6	0.2	11	-0.1	-0.6	0.5	24	0.84697	1
GLNA_MOUSE,	-1.6	-2.1	-1.1	10	-1.5	-2	-1	10	-0.1	-0.8	0.7	20	0.84746	1
Q78NS1_MOUSE,	1.1	0.7	1.4	23	1.2	0.8	1.5	20	-0.1	-0.6	0.4	43	0.8491	1
B2KGR9_MOUSE,DGKE_MOUSE,Q8C8R9_MOUSE,	0.6	-0.2	1.3	3	0.5	-0.3	1.2	4	0.1	-1	1.1	7	0.84912	1
CO024_MOUSE,Q14C26_MOUSE,	0.2	-0.5	0.9	5	0.3	-0.8	1.5	2	-0.1	-1.5	1.2	7	0.85085	1
DIRA1_MOUSE,	1.3	0.7	2	4	1.2	0.5	2.1	5	0.1	-1	1.1	9	0.85177	1
B9EJ86_MOUSE,	0.6	0	1.4	6	0.8	0	1.6	4	-0.1	-1.2	1	10	0.85269	1
UBE2O_MOUSE,A2A7X3_MOUSE,	2.5	1.7	3.9	8	2.6	2	3.3	9	-0.1	-1.2	1.4	17	0.85491	1
RAB18_MOUSE,Q0PD38_MOUSE,	-0.5	-0.9	0	9	-0.4	-0.9	0.1	8	-0.1	-0.7	0.6	17	0.85797	1
GRM7_MOUSE,Q8BKZ1_MOUSE,	-0.4	-1.2	0.4	4	-0.5	-1.3	0.4	4	0.1	-1.1	1.3	8	0.85878	1
B7ZN22_MOUSE,B7ZN20_MOUSE,ELMD1_MOUSE,Q0P556_MOUSE,	-0.4	-1.4	0.6	4	-0.5	-1.2	0.2	7	0.1	-1.1	1.3	11	0.85887	1
GSLG1_MOUSE,Q53WR6_MOUSE,	0.6	0.2	1	14	0.7	0	1.3	9	-0.1	-0.8	0.7	23	0.86021	1
XRP2_MOUSE,B1B076_MOUSE,	-1.2	-2.1	-0.3	2	-1.1	-2	-0.2	2	-0.1	-1.4	1.2	4	0.86411	1
Q6P1Y9_MOUSE,	1.9	1.3	2.6	5	2	1.3	2.8	4	-0.1	-1.1	0.9	9	0.86888	1
Q571F3_MOUSE,Q0VB06_MOUSE,NECP1_MOUSE,	2.1	1.4	2.8	4	2.2	1.3	3	2	-0.1	-1.2	1	6	0.86949	1
MIMIT_MOUSE,	-2.8	-3.4	-2.1	4	-2.8	-3.5	-2.2	3	0.1	-0.8	0.9	7	0.87011	1
K6PP_MOUSE,Q8C605_MOUSE,	3.5	3.2	3.9	34	3.6	3.3	3.9	29	-0.1	-0.5	0.4	63	0.8769	1
LRFN6_MOUSE,	0	-0.5	0.5	10	0	-0.6	0.6	8	-0.1	-0.8	0.7	18	0.87778	1
R7BP_MOUSE,	-0.4	-1.3	0.5	3	-0.6	-1.4	0.6	5	0.1	-1.4	1.4	8	0.8815	1
B2RQY8_MOUSE,Q7TNG0_MOUSE,SPG7_MOUSE,	-1.2	-2	-0.4	7	-1.3	-1.7	-0.8	11	0.1	-0.8	1	18	0.88366	1
Q68FG2_MOUSE,	2.4	2.3	2.6	168	2.5	2.3	2.6	148	-0.1	-0.2	0.2	316	0.88494	1
Q3TWN7_MOUSE,Q3UWN7_MOUSE,Q3UCY7_MOUSE,Q571E2_MOUSE,VAS1_MOUSE,Q3THZ3_MOUSE,Q3TT23_MOUSE,	0.6	0	1.1	6	0.6	-0.2	1.5	3	-0.1	-1.1	0.9	9	0.88579	1
MK03_MOUSE,	2.7	2.3	3.2	14	2.7	2.2	3.1	12	0.1	-0.5	0.7	26	0.88607	1
K1C42_MOUSE,	6.2	5.7	6.8	11	6.2	5.6	6.8	17	0.1	-0.8	0.9	28	0.88746	1
Q8R5L1_MOUSE,	-4.9	-5.6	-4.3	7	-4.9	-5.5	-4.2	3	-0.1	-1	0.8	10	0.88748	1
GRID1_MOUSE,Q3UUL5_MOUSE,	0	-0.8	0.8	5	0.1	-0.9	1	2	-0.1	-1.4	1.2	7	0.88901	1
VATE1_MOUSE,	1.9	1.2	2.5	7	2	1.2	2.7	8	-0.1	-1	0.9	15	0.89084	1
SCAM1_MOUSE,Q3TD71_MOUSE,	0.7	0.4	1	24	0.6	0.3	1	19	0.1	-0.4	0.5	43	0.89331	1
OXR1_MOUSE,	2.2	1.4	3.2	6	2.1	1.1	3.2	4	0.1	-1.3	1.5	10	0.89409	1
HMOX2_MOUSE,Q544R7_MOUSE,Q3U6W4_MOUSE,	0.5	0.1	0.9	18	0.4	0.1	0.8	15	0.1	-0.5	0.6	33	0.89518	1
MARH5_MOUSE,A2RTC8_MOUSE,	-1.2	-1.9	-0.5	6	-1.3	-2.2	-0.3	3	0.1	-1.1	1.3	9	0.89837	1
ESYT1_MOUSE,	-0.4	-1.5	0.6	3	-0.5	-1.4	0.4	4	0.1	-1.3	1.4	7	0.89975	1
NCPR_MOUSE,	0.5	-0.2	1.2	6	0.6	0.1	1	13	-0.1	-0.9	0.8	19	0.90084	1
CPT1C_MOUSE,	0.9	0.3	1.4	7	0.8	0.3	1.4	7	0.1	-0.7	0.8	14	0.90193	1
CF174_MOUSE,	1.1	0.7	1.7	14	1.1	0.6	1.6	13	0.1	-0.6	0.8	27	0.90462	1
CAH4_MOUSE,B1ATZ9_MOUSE,	-0.9	-1.6	-0.2	5	-0.9	-1.5	-0.3	6	0.1	-0.8	1	11	0.90817	1
SCAM5_MOUSE,	0.6	-0.1	1.3	6	0.6	-0.3	1.3	5	0.1	-1	1.2	11	0.90858	1
MYO5B_MOUSE,	1.4	0.8	2.1	3	1.5	0.9	2.1	4	-0.1	-1	0.8	7	0.9137	1
Q3UAS2_MOUSE,CAZA1_MOUSE,Q5RKN9_MOUSE,	3.8	3.1	4.5	6	3.9	3.1	4.7	5	-0.1	-1.1	1	11	0.91849	1
A2RS53_MOUSE,Q8C1Z9_MOUSE,TMED2_MOUSE,Q3THL1_MOUSE,Q8BPI2_MOUSE,Q3U9H7_MOUSE,	0.3	-0.4	1	3	0.2	-0.6	1	2	0.1	-1	1.1	5	0.92075	1
Q91V89_MOUSE,Q8K5D8_MOUSE,Q99PC9_MOUSE,Q7TNL5_MOUSE,	1.8	1.3	2.3	11	1.7	1.2	2.3	11	0.1	-0.7	0.8	22	0.92837	1
Q3V3U0_MOUSE,PYGB_MOUSE,Q3UYH9_MOUSE,A2AWQ5_MOUSE,	2.8	2.5	3.2	25	2.9	2.5	3.2	25	-0.1	-0.5	0.5	50	0.92893	1
NFASC_MOUSE,	0	-0.2	0.2	61	0	-0.3	0.2	55	0.1	-0.2	0.3	116	0.92974	1
Q0PD34_MOUSE,RB22A_MOUSE,	0.1	-0.6	0.8	5	0	-0.7	0.8	3	0.1	-0.9	1.1	8	0.93284	1
MTMR5_MOUSE,B7ZWK2_MOUSE,B2RXX4_MOUSE,	1.7	1.4	2	33	1.7	1.4	2.1	31	-0.1	-0.5	0.4	64	0.93541	1
Q6DFY2_MOUSE,Q3TYL3_MOUSE,	-0.6	-1	-0.3	20	-0.7	-1.1	-0.3	16	0.1	-0.5	0.5	36	0.93622	1
Q91VJ9_MOUSE,	0.4	-0.4	1.2	3	0.4	-0.5	1.4	3	-0.1	-1.3	1.2	6	0.94484	1
TPIS_MOUSE,	-1.1	-1.6	-0.5	7	-1	-1.6	-0.4	6	-0.1	-0.9	0.7	13	0.95405	1
Q544M1_MOUSE,LY6H_MOUSE,Q8K356_MOUSE,Q9D1X6_MOUSE,	-1.1	-1.7	-0.6	7	-1.1	-2.5	0.2	2	-0.1	-1.5	1.5	9	0.95569	1
RAB5C_MOUSE,Q3TJ39_MOUSE,	-0.3	-0.7	0	15	-0.3	-0.7	0.1	13	-0.1	-0.5	0.4	28	0.96978	1
PTH2_MOUSE,Q5SXR0_MOUSE,	-1.8	-2.3	-1.2	6	-1.8	-2.4	-1.2	4	0.1	-0.7	0.9	10	0.97842	1
PGRC2_MOUSE,	0.1	-0.6	0.8	4	0	-0.9	1	3	0.1	-1.1	1.2	7	0.97917	1
CAMLG_MOUSE,	0.2	-0.4	0.9	6	0.3	-0.4	1	5	-0.1	-1	0.9	11	0.98764	1
1433F_MOUSE,	1.7	1.3	2.1	18	1.7	1.3	2.2	13	0	-0.6	0.6	31	1	1
1433Z_MOUSE,	1.2	1	1.5	38	1.2	0.9	1.5	32	0	-0.3	0.4	70	1	1
A2A4K6_MOUSE,	-0.3	-0.5	0	41	-0.3	-0.5	0	42	0	-0.3	0.4	83	1	1
A2ACG7_MOUSE,Q3U505_MOUSE,RPN2_MOUSE,Q61833_MOUSE,	0	-0.4	0.4	16	0	-0.4	0.4	15	0	-0.5	0.5	31	1	1
A2RT70_MOUSE,TENR_MOUSE,	3	2.3	3.6	19	3	2.5	3.5	26	0	-0.8	0.8	45	1	1
IVD_MOUSE,A3KGG9_MOUSE,	-5.4	-5.9	-4.8	9	-5.4	-6	-4.7	4	0	-0.8	0.8	13	1	1
A3KMM1_MOUSE,B1AXV0_MOUSE,	0.8	0.4	1.2	13	0.9	0.4	1.3	11	0	-0.6	0.6	24	1	1
1433G_MOUSE,A8IP69_MOUSE,	1	0.7	1.4	20	1	0.6	1.4	14	0	-0.5	0.5	34	1	1
ACADV_MOUSE,B1AR27_MOUSE,	-0.2	-0.8	0.4	9	-0.2	-0.9	0.6	7	0	-0.9	0.9	16	1	1
ADA22_MOUSE,A4FUT9_MOUSE,	-0.3	-0.6	0.1	20	-0.3	-0.6	0	28	0	-0.4	0.5	48	1	1
Q8K232_MOUSE,ADDA_MOUSE,	2.6	1.9	3.6	7	2.6	2.1	3.5	7	0	-1.1	1.1	14	1	1
ANK2_MOUSE,	1.9	1.5	2.3	22	1.9	1.3	2.5	18	0	-0.7	0.7	40	1	1
AP180_MOUSE,	2	1.8	2.3	43	2	1.8	2.3	39	0	-0.3	0.4	82	1	1
AP2A1_MOUSE,	2.1	1.9	2.3	81	2.1	1.9	2.3	79	0	-0.3	0.2	160	1	1
Q5SW83_MOUSE,ARP2_MOUSE,	2.4	1.8	2.8	13	2.3	1.9	2.9	11	0	-0.7	0.6	24	1	1
AT1A1_MOUSE,	-0.2	-0.3	-0.1	352	-0.2	-0.4	-0.1	339	0	-0.1	0.2	691	1	1
ATAD1_MOUSE,	-1.3	-1.6	-1	18	-1.3	-1.6	-1	23	0	-0.4	0.4	41	1	1
ATLA1_MOUSE,	1	0.7	1.3	32	1	0.7	1.3	25	0	-0.4	0.4	57	1	1
ATLA2_MOUSE,Q8BYP9_MOUSE,	1	0.4	1.7	5	1	0.3	1.7	5	0	-0.9	1	10	1	1
Q3UBA1_MOUSE,Q3TQE3_MOUSE,Q80ZW9_MOUSE,Q8C1Y9_MOUSE,Q3THR3_MOUSE,B0LAE4_MOUSE,Q3TIC7_MOUSE,AR6P1_MOUSE,	0.7	-0.1	1.5	2	0.8	0	1.5	2	0	-1.1	1	4	1	1
K1C13_MOUSE,B1AQ76_MOUSE,	6.1	5.7	6.5	20	6.1	5.6	6.6	20	0	-0.7	0.6	40	1	1
S4A10_MOUSE,B1AWV9_MOUSE,B1AWV7_MOUSE,B1AWV8_MOUSE,Q8C943_MOUSE,	-0.5	-1	-0.1	11	-0.5	-0.9	-0.1	15	0	-0.7	0.6	26	1	1
B2KGQ6_MOUSE,GDPD1_MOUSE,	-0.2	-0.6	0.2	13	-0.2	-0.7	0.3	11	0	-0.6	0.6	24	1	1
B2RXT3_MOUSE,	-4.1	-4.4	-3.8	28	-4.1	-4.4	-3.8	27	0	-0.4	0.4	55	1	1
CLMN_MOUSE,B9EJ15_MOUSE,	0.2	-0.5	0.8	5	0.2	-0.4	0.8	6	0	-0.9	0.8	11	1	1
C1TM_MOUSE,	-1.9	-2.5	-1.4	12	-1.9	-2.4	-1.5	13	0	-0.7	0.7	25	1	1
C560_MOUSE,Q5XK33_MOUSE,	-1.4	-2.3	-0.5	3	-1.4	-2.7	-0.3	2	0	-1.4	1.6	5	1	1
CA095_MOUSE,	0.2	-0.5	0.9	5	0.2	-0.6	1	4	0	-1.1	1	9	1	1
Q5SUC3_MOUSE,CALX_MOUSE,	0.2	-0.1	0.4	40	0.1	-0.1	0.4	46	0	-0.3	0.3	86	1	1
CAMKV_MOUSE,	1.9	1.6	2.1	40	1.9	1.6	2.1	34	0	-0.3	0.3	74	1	1
CAPS1_MOUSE,	2.1	1.9	2.3	75	2.1	1.9	2.3	73	0	-0.3	0.2	148	1	1
CC50A_MOUSE,	0.6	-0.1	1.3	6	0.6	-0.2	1.3	5	0	-1	1	11	1	1
CCNY_MOUSE,	-0.5	-1.1	0	8	-0.6	-1.1	-0.1	8	0	-0.7	0.7	16	1	1
CDIPT_MOUSE,	0.6	0.2	1.1	10	0.6	0.1	1.2	8	0	-0.7	0.7	18	1	1
CH055_MOUSE,	0.8	0.2	1.5	6	0.8	-0.1	1.6	4	0	-1	1.1	10	1	1
CHCH3_MOUSE,	-2.2	-2.5	-1.9	19	-2.2	-2.6	-1.9	13	0	-0.4	0.5	32	1	1
Q3UQL2_MOUSE,CSN3_MOUSE,	3	2.4	3.6	9	2.9	2.4	3.6	6	0	-0.8	0.8	15	1	1
CTNA2_MOUSE,	0.5	0	1	14	0.5	0.1	1	14	0	-0.6	0.6	28	1	1
CTNB1_MOUSE,Q3UZT7_MOUSE,	0.3	-0.2	0.7	15	0.2	-0.2	0.7	15	0	-0.5	0.6	30	1	1
D39U1_MOUSE,	-2.4	-2.9	-1.9	5	-2.4	-3	-1.7	5	0	-0.9	0.8	10	1	1
DHB12_MOUSE,Q0VGQ1_MOUSE,	-0.1	-0.5	0.2	17	-0.2	-0.6	0.2	15	0	-0.5	0.5	32	1	1
DHE3_MOUSE,	-4.9	-5.2	-4.6	26	-4.8	-5.2	-4.5	21	0	-0.5	0.4	47	1	1
DLDH_MOUSE,	-5.1	-5.4	-4.7	14	-5.1	-5.4	-4.7	16	0	-0.5	0.5	30	1	1
DLG1_MOUSE,Q3UP61_MOUSE,	-0.5	-0.8	-0.1	16	-0.5	-0.9	-0.2	17	0	-0.5	0.5	33	1	1
DNM1L_MOUSE,	1.6	1.4	1.8	50	1.6	1.4	1.8	54	0	-0.3	0.3	104	1	1
Q58E64_MOUSE,Q3UA81_MOUSE,Q3TII3_MOUSE,EF1A1_MOUSE,	2.4	2	2.7	18	2.4	2	2.7	21	0	-0.5	0.5	39	1	1
ENOG_MOUSE,Q545V3_MOUSE,Q3UJ20_MOUSE,	1.8	1.5	2.1	28	1.8	1.5	2.2	23	0	-0.4	0.4	51	1	1
ERLN1_MOUSE,	-0.3	-0.7	0.2	10	-0.3	-0.8	0.2	9	0	-0.6	0.7	19	1	1
FAHD2_MOUSE,	-4.4	-5.5	-3.3	2	-4.4	-5	-3.7	3	0	-1.3	1.2	5	1	1
FKBP8_MOUSE,	-0.8	-1.4	-0.2	5	-0.7	-1.3	-0.1	6	0	-0.9	0.8	11	1	1
FLOT1_MOUSE,Q540I4_MOUSE,	-0.6	-1	-0.3	23	-0.6	-0.9	-0.3	23	0	-0.5	0.5	46	1	1
FYN_MOUSE,	-0.6	-1.3	0.2	4	-0.6	-1.3	0.1	5	0	-1	1	9	1	1
B2RSR7_MOUSE,GPD1L_MOUSE,	0.5	-0.2	1.3	4	0.6	0	1.1	6	0	-1	0.9	10	1	1
IPO5_MOUSE,	1.4	1	1.8	18	1.4	1	1.7	23	0	-0.5	0.6	41	1	1
IPO7_MOUSE,	1.7	1.3	2.2	17	1.7	1.3	2.1	15	0	-0.5	0.6	32	1	1
K1468_MOUSE,	1.3	0.9	1.7	16	1.3	0.9	1.7	15	0	-0.6	0.6	31	1	1
K2C79_MOUSE,	6.2	5.8	6.6	20	6.1	5.8	6.4	28	0	-0.5	0.5	48	1	1
K6PF_MOUSE,	3.9	3.6	4.2	31	3.9	3.6	4.2	31	0	-0.4	0.4	62	1	1
KAP3_MOUSE,	-1.1	-1.7	-0.5	6	-1.1	-1.6	-0.5	10	0	-0.8	0.8	16	1	1
KCC2D_MOUSE,	-0.4	-0.6	-0.2	79	-0.4	-0.6	-0.2	76	0	-0.2	0.3	155	1	1
KCC2G_MOUSE,	-0.4	-0.6	-0.2	74	-0.3	-0.5	-0.1	72	0	-0.3	0.2	146	1	1
KCD12_MOUSE,	0.2	-0.7	1.1	5	0.2	-0.7	1.1	7	0	-1.3	1.3	12	1	1
LPPRC_MOUSE,	-1.1	-1.4	-0.8	29	-1.1	-1.4	-0.8	29	0	-0.4	0.4	58	1	1
LRC59_MOUSE,Q3TF84_MOUSE,	-0.3	-0.8	0.2	11	-0.3	-0.8	0.3	7	0	-0.7	0.7	18	1	1
B2KGT6_MOUSE,MAP2_MOUSE,	1	0.5	1.6	9	1	0.4	1.9	5	0	-1	0.9	14	1	1
MAST3_MOUSE,	1	0.3	2	5	1.1	0.3	1.9	6	0	-1.1	1.2	11	1	1
MLEC_MOUSE,	0	-0.4	0.5	11	0	-0.5	0.5	8	0	-0.6	0.7	19	1	1
Q3UF03_MOUSE,Q3UKQ5_MOUSE,MPRD_MOUSE,	0.3	-0.3	0.9	7	0.4	-0.1	0.8	10	0	-0.7	0.7	17	1	1
NB5R3_MOUSE,	-1	-1.3	-0.7	23	-1	-1.3	-0.7	28	0	-0.4	0.4	51	1	1
NCAM1_MOUSE,	-0.7	-0.8	-0.5	120	-0.7	-0.9	-0.5	119	0	-0.2	0.3	239	1	1
NCDN_MOUSE,	1.9	1.8	2.1	130	2	1.8	2.2	113	0	-0.3	0.2	243	1	1
NDUA8_MOUSE,	-2.9	-3.3	-2.4	7	-2.8	-3.3	-2.4	6	0	-0.7	0.6	13	1	1
A2AJX2_MOUSE,NDUF4_MOUSE,	-1.3	-2.1	-0.6	3	-1.4	-2.1	-0.6	4	0	-1	1.1	7	1	1
NSF_MOUSE,	2.6	2.4	2.8	95	2.6	2.4	2.8	99	0	-0.2	0.3	194	1	1
NSMA2_MOUSE,	0.5	0	1	9	0.5	0	0.9	10	0	-0.6	0.7	19	1	1
Q80VX2_MOUSE,OX2G_MOUSE,	-0.8	-1.2	-0.3	15	-0.8	-1.2	-0.3	10	0	-0.6	0.6	25	1	1
PCBP1_MOUSE,	0.5	-0.1	1.1	8	0.5	-0.1	1.1	6	0	-0.8	0.8	14	1	1
Q3U7Z6_MOUSE,PGAM1_MOUSE,	2.2	1.7	2.7	16	2.2	1.7	2.6	10	0	-0.6	0.6	26	1	1
PHAR1_MOUSE,	0.1	-0.6	0.8	4	0.1	-0.4	0.7	7	0	-0.9	0.9	11	1	1
Q8JZZ5_MOUSE,PIPNB_MOUSE,	0.1	-0.6	0.8	5	0.1	-0.5	0.7	7	0	-0.9	0.9	12	1	1
PLXA4_MOUSE,B9EJ29_MOUSE,	-0.5	-0.8	-0.2	30	-0.5	-0.8	-0.2	32	0	-0.4	0.4	62	1	1
PRDX3_MOUSE,	-4.9	-5.5	-4.2	3	-4.8	-5.5	-4.2	5	0	-0.9	0.8	8	1	1
Q1MXF8_MOUSE,SCN2B_MOUSE,	-0.3	-0.6	0	24	-0.3	-0.6	0	18	0	-0.4	0.4	42	1	1
Q3T9E5_MOUSE,Q3TD54_MOUSE,NICA_MOUSE,Q6ZQF2_MOUSE,	-0.1	-1.3	1	2	-0.1	-1.2	0.9	3	0	-1.5	1.5	5	1	1
COPB_MOUSE,Q3T9Y4_MOUSE,	1.4	0.8	2	13	1.4	1	1.8	14	0	-0.7	0.7	27	1	1
S2544_MOUSE,Q3TE12_MOUSE,Q3TMC4_MOUSE,	-1.6	-2.2	-0.9	6	-1.6	-2.4	-0.8	4	0	-0.9	1	10	1	1
Q3TXU8_MOUSE,Q3TH84_MOUSE,PGRC1_MOUSE,Q3TFP8_MOUSE,	-0.1	-0.6	0.4	7	-0.1	-0.6	0.4	6	0	-0.7	0.6	13	1	1
Q8C454_MOUSE,Q3TI40_MOUSE,A2AT31_MOUSE,Q3TI19_MOUSE,MTX2_MOUSE,Q2M4G1_MOUSE,	-0.9	-1.8	0.1	2	-0.9	-2	0.2	2	0	-1.4	1.5	4	1	1
Q53ZT3_MOUSE,Q6GR78_MOUSE,Q3TWF3_MOUSE,A4_MOUSE,	0.3	-0.7	1.4	3	0.3	-0.4	1.1	6	0	-1.3	1.3	9	1	1
Q3TYE5_MOUSE,LSAMP_MOUSE,	-0.7	-1	-0.5	33	-0.7	-1	-0.4	30	0	-0.4	0.4	63	1	1
Q6XMP4_MOUSE,SYAC_MOUSE,Q3TZ32_MOUSE,Q3UD67_MOUSE,	3	2.4	4	3	3.2	2.3	4	5	0	-1.1	1.3	8	1	1
Q3U125_MOUSE,CJ058_MOUSE,	-0.6	-1	-0.2	16	-0.5	-1	-0.1	13	0	-0.6	0.5	29	1	1
MP2K1_MOUSE,Q3TMJ8_MOUSE,Q3U3F4_MOUSE,Q9JJE1_MOUSE,	1.8	1.5	2.2	20	1.8	1.5	2.2	15	0	-0.5	0.5	35	1	1
CD47_MOUSE,Q3U967_MOUSE,	-0.2	-0.5	0.1	29	-0.2	-0.5	0.1	29	0	-0.4	0.4	58	1	1
Q3UB66_MOUSE,	-0.8	-1	-0.5	35	-0.7	-1	-0.5	28	0	-0.4	0.3	63	1	1
Q3U6C7_MOUSE,Q3UCC6_MOUSE,SUCB1_MOUSE,	-1.4	-1.7	-1.2	28	-1.4	-1.7	-1.1	25	0	-0.4	0.4	53	1	1
Q3UCX7_MOUSE,	-0.2	-0.6	0.1	15	-0.2	-0.6	0.2	12	0	-0.5	0.5	27	1	1
Q3UBH0_MOUSE,Q9QYT9_MOUSE,Q3TZI7_MOUSE,PRIO_MOUSE,Q3UG89_MOUSE,Q4FJQ7_MOUSE,Q3UF68_MOUSE,	-0.4	-0.7	-0.1	22	-0.3	-0.7	0	20	0	-0.4	0.4	42	1	1
Q3UGT1_MOUSE,CPT1A_MOUSE,Q7TQD5_MOUSE,A8ASF5_MOUSE,	-1.2	-1.9	-0.4	4	-1.1	-1.8	-0.5	5	0	-1	0.9	9	1	1
GNAQ_MOUSE,Q3UHH5_MOUSE,	-0.5	-0.8	-0.3	44	-0.5	-0.8	-0.3	35	0	-0.3	0.3	79	1	1
FAS_MOUSE,Q3UHT6_MOUSE,	2	1.7	2.3	28	2	1.7	2.4	25	0	-0.5	0.4	53	1	1
Q3UJS0_MOUSE,RL8_MOUSE,	0.4	-0.1	0.9	7	0.4	0	0.9	10	0	-0.7	0.6	17	1	1
Q3UN10_MOUSE,Q80UI9_MOUSE,WFS1_MOUSE,Q3TDI2_MOUSE,	2.1	1.6	2.5	18	2.1	1.6	2.6	16	0	-0.7	0.6	34	1	1
KPCG_MOUSE,Q3UN66_MOUSE,	0.7	0.5	0.9	68	0.7	0.5	0.9	77	0	-0.2	0.3	145	1	1
Q3UUF0_MOUSE,Q8C541_MOUSE,FAAH1_MOUSE,B1ASG4_MOUSE,	0.5	0.1	1	12	0.5	0	1	9	0	-0.6	0.7	21	1	1
Q3TPB6_MOUSE,Q3UYK8_MOUSE,	1.1	0.5	2	7	1.1	0.3	2.6	7	0	-1.6	1.2	14	1	1
Q4FJQ0_MOUSE,RAB7A_MOUSE,	-0.6	-0.8	-0.3	24	-0.6	-0.9	-0.3	22	0	-0.4	0.4	46	1	1
Q4VAA1_MOUSE,RAB5A_MOUSE,	-0.2	-0.6	0.1	14	-0.2	-0.6	0.1	12	0	-0.5	0.5	26	1	1
RAB14_MOUSE,Q50HX2_MOUSE,Q50HX4_MOUSE,	-0.6	-0.9	-0.3	23	-0.6	-1	-0.3	20	0	-0.4	0.4	43	1	1
TFR1_MOUSE,Q542D9_MOUSE,	-0.3	-0.7	0.1	17	-0.3	-0.7	0.1	17	0	-0.5	0.6	34	1	1
Q545N7_MOUSE,KCRU_MOUSE,	-3.6	-3.9	-3.3	17	-3.6	-3.9	-3.3	19	0	-0.4	0.4	36	1	1
CAZA2_MOUSE,Q5DQJ3_MOUSE,	3.9	3.5	4.2	14	3.9	3.5	4.3	14	0	-0.5	0.5	28	1	1
RL19_MOUSE,A2A547_MOUSE,Q5I0T8_MOUSE,	0.2	-0.7	1.1	2	0.2	-0.6	1	2	0	-1.2	1.2	4	1	1
Q5SRA3_MOUSE,Q5SRA0_MOUSE,Q5SRA4_MOUSE,Q5SVE1_MOUSE,ADA23_MOUSE,	0	-0.7	0.7	6	0	-0.5	0.6	9	0	-0.9	0.8	15	1	1
Q80U89_MOUSE,Q5SXR6_MOUSE,CLH_MOUSE,	2.6	2.5	2.8	208	2.6	2.5	2.8	200	0	-0.2	0.2	408	1	1
Q58EW0_MOUSE,RL18_MOUSE,Q642K1_MOUSE,	0.7	0.3	1.1	9	0.7	0.3	1.2	11	0	-0.6	0.6	20	1	1
Q6GTD3_MOUSE,	-2.6	-2.7	-2.4	66	-2.6	-2.8	-2.4	44	0	-0.2	0.3	110	1	1
Q6P6I8_MOUSE,	-0.5	-0.7	-0.3	41	-0.5	-0.7	-0.2	42	0	-0.3	0.3	83	1	1
Q6PAT3_MOUSE,	0.3	-0.2	0.9	10	0.3	-0.3	0.9	8	0	-0.7	0.8	18	1	1
Q6ZQ54_MOUSE,	0	-0.2	0.2	54	0	-0.3	0.2	51	0	-0.3	0.3	105	1	1
Q71LX8_MOUSE,	2.2	2	2.4	83	2.2	2	2.4	76	0	-0.3	0.2	159	1	1
Q7TQH3_MOUSE,	0.9	0.7	1.2	35	0.9	0.6	1.1	37	0	-0.3	0.4	72	1	1
Q8BK46_MOUSE,PSMD3_MOUSE,Q3TP95_MOUSE,	3	2	4.1	8	3.1	2.6	3.8	8	0	-1.2	1.1	16	1	1
Q8C4I3_MOUSE,	-0.3	-0.5	-0.1	61	-0.3	-0.6	-0.1	58	0	-0.3	0.3	119	1	1
GABR1_MOUSE,Q6PGJ2_MOUSE,Q8CAF8_MOUSE,	-0.8	-1.6	0	6	-0.8	-1.7	0.1	2	0	-1.2	1.2	8	1	1
Q8CC13_MOUSE,	2.1	1.9	2.4	51	2.2	2	2.4	53	0	-0.4	0.3	104	1	1
Q5SX22_MOUSE,Q6NZC5_MOUSE,Q3TH47_MOUSE,Q8VC46_MOUSE,Q78XY9_MOUSE,Q922B0_MOUSE,UBIQ_MOUSE,Q642L7_MOUSE,A5JUZ1_MOUSE,Q8R0Z9_MOUSE,Q8C2K3_MOUSE,Q66JP1_MOUSE,Q922Z8_MOUSE,	0.1	-0.2	0.4	33	0.1	-0.2	0.5	34	0	-0.5	0.4	67	1	1
B7U582_MOUSE,HSP72_MOUSE,Q99KD7_MOUSE,	-0.2	-0.6	0.1	22	-0.2	-0.6	0.1	24	0	-0.4	0.4	46	1	1
Q9CYT3_MOUSE,Q99N15_MOUSE,	-4.7	-5.4	-4.1	5	-4.7	-5.5	-4	3	0	-1	1	8	1	1
Q8BH40_MOUSE,STX7_MOUSE,Q9DCE1_MOUSE,	0.1	-0.3	0.6	9	0.1	-0.4	0.6	9	0	-0.6	0.7	18	1	1
Q9QX61_MOUSE,Q3UNR4_MOUSE,	-1	-1.7	-0.3	6	-1	-2.1	0	3	0	-1.2	1.3	9	1	1
RAB2A_MOUSE,Q0PD65_MOUSE,	-0.6	-0.9	-0.3	26	-0.6	-0.9	-0.3	23	0	-0.4	0.4	49	1	1
RAB35_MOUSE,Q3U0T9_MOUSE,	0	-0.5	0.4	11	-0.1	-0.6	0.5	9	0	-0.6	0.7	20	1	1
RB39B_MOUSE,Q0PD14_MOUSE,	-0.1	-0.7	0.5	7	-0.1	-0.8	0.6	6	0	-0.9	0.9	13	1	1
Q3TN61_MOUSE,Q4VAE6_MOUSE,RHOA_MOUSE,	-0.3	-0.7	0.1	14	-0.3	-0.8	0.1	12	0	-0.6	0.6	26	1	1
B7ZP22_MOUSE,ROA2_MOUSE,	0.6	-0.2	1.4	3	0.7	-0.3	1.6	2	0	-1.3	1.2	5	1	1
Q5RKP4_MOUSE,RPN1_MOUSE,	0.1	-0.2	0.3	32	0.1	-0.2	0.3	34	0	-0.3	0.3	66	1	1
RS9_MOUSE,	0.1	-0.5	0.6	6	0.1	-0.4	0.7	7	0	-0.8	0.7	13	1	1
RTN1_MOUSE,Q4FJL2_MOUSE,	1	0.8	1.3	31	1.1	0.8	1.4	28	0	-0.4	0.3	59	1	1
RTN3_MOUSE,	1.1	0.9	1.4	50	1.1	0.9	1.4	39	0	-0.3	0.4	89	1	1
RTN4_MOUSE,	0.8	0.6	1.1	54	0.9	0.6	1.1	54	0	-0.3	0.3	108	1	1
SCN1B_MOUSE,	0.2	-0.4	0.7	6	0.2	-0.4	0.7	7	0	-0.8	0.8	13	1	1
SCOT1_MOUSE,	-5.1	-5.4	-4.7	15	-5.1	-5.5	-4.7	19	0	-0.5	0.6	34	1	1
SEPT2_MOUSE,	0.5	-0.1	1.1	6	0.5	-0.1	1.1	5	0	-0.8	0.9	11	1	1
SH3G2_MOUSE,A2ALV3_MOUSE,	0.8	0.2	1.4	6	0.8	0.1	1.4	4	0	-0.8	0.9	10	1	1
Q3U6D7_MOUSE,SNG1_MOUSE,	1	0.6	1.4	11	1	0.5	1.4	11	0	-0.5	0.6	22	1	1
SYN1_MOUSE,	2.1	1.9	2.4	51	2.2	1.9	2.4	56	0	-0.3	0.3	107	1	1
Q53YX2_MOUSE,THY1_MOUSE,	-0.7	-1	-0.4	22	-0.7	-1	-0.4	22	0	-0.4	0.4	44	1	1
TIP_MOUSE,	0.2	-0.5	0.9	7	0.2	-0.7	1.1	4	0	-1.1	1.1	11	1	1
TMM33_MOUSE,	0.5	-0.3	1.2	2	0.4	-0.3	1.2	2	0	-1.1	1.1	4	1	1
TMM49_MOUSE,	0	-0.8	0.9	2	0	-0.9	0.9	2	0	-1.2	1.2	4	1	1
TMM65_MOUSE,	-1.4	-2.1	-0.7	4	-1.3	-1.9	-0.7	5	0	-0.9	0.9	9	1	1
VAPA_MOUSE,	0.3	0	0.6	26	0.3	0	0.7	15	0	-0.5	0.4	41	1	1
XPO7_MOUSE,	2	1.5	2.5	13	2	1.6	2.5	15	0	-0.7	0.7	28	1	1

## Sheet: PrL-membrane-associated fract.
Group	14N shocked/ 15N reference				14N control/15N reference				14N shock/14N control
Uniprot ID	log2ratio	lowerCI	upperCI	# of quantified peptides	log2ratio	lowerCI	upperCI	# of quantified peptides	log2ratio	lowerCI	upperCI	# of quantified peptides identified	p-value	adjusted p-value
ACON_MOUSE,	-3.9	-4.1	-3.6	39	-4.9	-5.1	-4.7	48	1	0.7	1.3	87	2.5703e-14	2.97e-11
SYN2_MOUSE,	1.6	1.4	1.8	81	2.1	1.9	2.3	104	-0.5	-0.8	-0.3	185	9.3513e-09	5.41e-06
MDHM_MOUSE,	-5.3	-5.6	-5	28	-6.3	-6.6	-6	27	1	0.6	1.4	55	1.9508e-08	7.52e-06
DHE3_MOUSE,	-3.5	-3.9	-3.1	15	-4.9	-5.4	-4.5	14	1.4	0.8	2	29	2.4554e-07	7.1e-05
DHSA_MOUSE,	-4.1	-4.6	-3.5	10	-5.5	-6	-5.1	16	1.4	0.8	2.1	26	7.92e-07	0.00018311
AATM_MOUSE,	-4.7	-5	-4.4	22	-5.8	-6.2	-5.3	25	1	0.5	1.5	47	6.1734e-06	0.00114262
ATPB_MOUSE,	-4.2	-4.4	-4	58	-4.7	-4.9	-4.5	49	0.5	0.3	0.8	107	6.919e-06	0.00114262
Q8CE19_MOUSE,	1.6	1.4	1.8	62	2.1	1.9	2.3	75	-0.5	-0.7	-0.2	137	1.0347e-05	0.00149514
ODO1_MOUSE,	-2.2	-2.6	-1.9	18	-3.1	-3.4	-2.8	16	0.8	0.4	1.3	34	1.4465e-05	0.00185795
B2RXT3_MOUSE,	-2.3	-2.7	-2	17	-3.3	-3.6	-2.9	13	1	0.5	1.4	30	2.2271e-05	0.00257453
DLDH_MOUSE,	-4	-4.4	-3.6	11	-4.9	-5.3	-4.5	7	0.9	0.4	1.5	18	0.00055088	0.0548329
SYN1_MOUSE,	1.9	1.7	2.1	64	2.3	2.1	2.5	57	-0.4	-0.7	-0.1	121	0.0005692	0.0548329
IDH3A_MOUSE,	-3.1	-3.4	-2.9	32	-3.6	-3.9	-3.4	36	0.5	0.2	0.9	68	0.00062252	0.0553564
ODPB_MOUSE,	-4.3	-4.7	-3.9	14	-5.2	-5.6	-4.8	13	0.9	0.3	1.4	27	0.0013531	0.111727
Q3TQP7_MOUSE,THIL_MOUSE,	-4.7	-5	-4.4	15	-5.5	-5.9	-5	12	0.8	0.2	1.3	27	0.0015077	0.116193
Q6IFT3_MOUSE,	4.2	3.7	4.8	14	5.8	5.1	6.6	6	-1.6	-2.6	-0.6	20	0.0024506	0.177056
Q3UFJ3_MOUSE,ODPA_MOUSE,	-4.2	-4.6	-3.7	9	-5.1	-5.6	-4.6	11	0.9	0.2	1.6	20	0.0044187	0.300472
B2RS41_MOUSE,SSDH_MOUSE,	-4.8	-5.3	-4.2	9	-5.9	-6.5	-5.3	5	1.1	0.3	1.9	14	0.0065229	0.418915
VATA_MOUSE,	2.2	2	2.4	43	1.9	1.7	2.1	55	0.3	0	0.6	98	0.015443	0.939585
ODO2_MOUSE,	-1.7	-2.1	-1.3	13	-2.3	-2.6	-1.9	15	0.5	0	1	28	0.017472	0.981024
B2RSN3_MOUSE,TBB2B_MOUSE,	0.8	0.7	0.9	250	0.9	0.8	1	260	-0.1	-0.2	0	510	0.018578	0.981024
TBB2A_MOUSE,	0.8	0.7	0.9	254	0.9	0.8	1	265	-0.1	-0.2	0	519	0.01867	0.981024
BIG3_MOUSE,	6.1	5.3	6.9	9	0.9	0.1	1.8	4	5.2	4	6.3	13	0.020019	1
TBB5_MOUSE,	0.8	0.7	0.9	254	0.9	0.8	1	268	-0.1	-0.2	0	522	0.023563	1
PRDX3_MOUSE,	-4.1	-4.6	-3.5	4	-4.9	-5.6	-4.3	4	0.9	0.1	1.7	8	0.026552	1
CPNS1_MOUSE,	-1.1	-1.8	-0.4	3	-0.1	-0.7	0.5	5	-1	-1.9	-0.1	8	0.026731	1
CISY_MOUSE,	-4.1	-4.5	-3.7	10	-4.7	-5.1	-4.2	11	0.6	0	1.2	21	0.02754	1
B2KGT6_MOUSE,MAP2_MOUSE,	1.1	0.6	1.7	11	0.5	0	1	12	0.7	0	1.4	23	0.038529	1
Q3U7Z6_MOUSE,PGAM1_MOUSE,	3	2.7	3.3	26	2.7	2.3	2.9	23	0.4	0	0.8	49	0.039394	1
EFTU_MOUSE,	-1.4	-1.8	-1.1	20	-1.9	-2.3	-1.5	11	0.5	0	1	31	0.041549	1
ODPX_MOUSE,A2AWH6_MOUSE,	-2.1	-2.7	-1.4	3	-3	-3.8	-2.3	3	0.9	0	2	6	0.04316	1
ADT1_MOUSE,Q8BVI9_MOUSE,	-1.5	-1.6	-1.4	220	-1.6	-1.7	-1.5	249	0.1	0	0.2	469	0.046011	1
A2A4H7_MOUSE,PLAK_MOUSE,	1.2	0.5	1.8	5	0	-1	1	3	1.1	-0.1	2.4	8	0.051557	1
NDUV1_MOUSE,	-2.3	-2.6	-1.9	19	-2.7	-3	-2.3	15	0.4	-0.1	0.9	34	0.058386	1
PSD3_MOUSE,	2.3	1.8	2.7	12	1.7	1.3	2.2	10	0.5	-0.1	1.1	22	0.061992	1
4F2_MOUSE,	-0.7	-0.9	-0.5	71	-0.9	-1.1	-0.7	66	0.2	-0.1	0.4	137	0.066055	1
Q91VA7_MOUSE,	-1.4	-1.7	-1.1	26	-1.8	-2.1	-1.5	23	0.3	-0.1	0.7	49	0.066391	1
Q3UQ73_MOUSE,	-3	-3.2	-2.7	28	-3.3	-3.5	-3	29	0.3	-0.1	0.6	57	0.06715	1
PP1B_MOUSE,Q3TBE5_MOUSE,Q3TL90_MOUSE,Q542E7_MOUSE,	2.2	1.8	2.5	25	1.7	1.4	2.1	19	0.4	-0.1	0.9	44	0.068784	1
ACTN1_MOUSE,	1.9	1.7	2.2	56	2.1	1.9	2.4	63	-0.2	-0.5	0.1	119	0.072527	1
B8QI35_MOUSE,C7G3P1_MOUSE,	1.4	1	1.8	20	1.9	1.4	2.5	14	-0.6	-1.3	0.1	34	0.072578	1
CH60_MOUSE,	-3	-3.3	-2.7	35	-3.3	-3.5	-3	32	0.3	-0.1	0.6	67	0.072633	1
Q80X68_MOUSE,Q9DAM4_MOUSE,	-4.1	-4.7	-3.4	3	-4.8	-5.5	-4.2	6	0.8	-0.1	1.7	9	0.072746	1
ATPO_MOUSE,	-2.3	-2.6	-2	26	-2.6	-2.9	-2.3	23	0.3	-0.1	0.7	49	0.078668	1
AIBP_MOUSE,	-3.8	-5	-3	2	-5	-5.6	-4.3	3	1.2	-0.2	2.2	5	0.083352	1
A6ZI44_MOUSE,Q5FWB7_MOUSE,ALDOA_MOUSE,	-0.9	-1.4	-0.4	10	-1.4	-1.8	-0.9	9	0.5	-0.1	1.2	19	0.083916	1
VATE1_MOUSE,	0.7	0.3	1.1	15	1.1	0.8	1.5	15	-0.4	-0.9	0.1	30	0.08795	1
PCCB_MOUSE,Q9DBG2_MOUSE,Q8CFZ3_MOUSE,Q7TMF4_MOUSE,A0PJE6_MOUSE,	-3.6	-4.7	-2.5	2	-4.7	-5.5	-3.9	3	1.1	-0.2	2.5	5	0.089541	1
Q3UY71_MOUSE,LKHA4_MOUSE,	2.8	1.7	3.9	2	1.5	0.6	2.5	2	1.2	-0.3	2.7	4	0.090414	1
ADT2_MOUSE,Q545A2_MOUSE,	-1.6	-1.7	-1.5	169	-1.7	-1.8	-1.5	180	0.1	-0.1	0.3	349	0.090979	1
CPNE6_MOUSE,	3.7	3.2	4.3	7	3	2.2	3.8	5	0.8	-0.2	1.7	12	0.09211	1
DPYL2_MOUSE,	-1.3	-1.7	-0.9	16	-1.8	-2.3	-1.3	14	0.5	-0.1	1.1	30	0.09712	1
TBB4_MOUSE,	0.7	0.6	0.8	220	0.8	0.7	0.9	227	-0.1	-0.2	0.1	447	0.098349	1
Q6PHZ1_MOUSE,RL17_MOUSE,Q6ZWZ7_MOUSE,Q80V08_MOUSE,Q505B1_MOUSE,	1	0	2	4	0.1	-0.5	0.7	6	0.9	-0.3	2	10	0.10132	1
Q80TN1_MOUSE,KCC2A_MOUSE,	-1	-1.1	-0.8	262	-0.9	-1	-0.8	292	-0.1	-0.2	0.1	554	0.10589	1
MAG_MOUSE,	-4.4	-4.9	-3.9	11	-4.9	-5.2	-4.5	14	0.4	-0.1	1	25	0.10838	1
RL18_MOUSE,Q58EW0_MOUSE,Q642K1_MOUSE,	0.5	0.2	0.9	13	0.1	-0.3	0.5	11	0.4	-0.1	0.9	24	0.11358	1
Q6S388_MOUSE,Q6S390_MOUSE,Q6S393_MOUSE,Q6S387_MOUSE,Q6S385_MOUSE,Q6S392_MOUSE,PLEC1_MOUSE,	1.4	1.1	1.7	54	1.1	0.9	1.4	75	0.2	-0.1	0.6	129	0.11615	1
Q3U7X9_MOUSE,Q8C2J5_MOUSE,Q69ZW4_MOUSE,	1.7	1.5	1.9	113	1.9	1.7	2	109	-0.1	-0.4	0.1	222	0.11653	1
K1045_MOUSE,	0.3	0	0.6	24	0.5	0.2	0.9	23	-0.3	-0.7	0.1	47	0.11678	1
Q684I8_MOUSE,Q3TGZ3_MOUSE,Q3TKM5_MOUSE,IDH3G_MOUSE,	-1.8	-2.1	-1.4	17	-2.1	-2.4	-1.7	16	0.3	-0.1	0.8	33	0.11745	1
NDRG2_MOUSE,	1.8	1.5	2.1	19	2.1	1.8	2.5	21	-0.3	-0.7	0.1	40	0.1196	1
Q3UYM8_MOUSE,MYPR_MOUSE,	-4.2	-4.4	-4	84	-4.3	-4.5	-4.1	81	0.1	-0.1	0.4	165	0.11978	1
A1BN54_MOUSE,	2	1.7	2.2	57	2.1	1.9	2.4	63	-0.2	-0.5	0.1	120	0.11989	1
EF1A2_MOUSE,	2	1.7	2.2	29	1.7	1.4	2	38	0.2	-0.1	0.6	67	0.13565	1
SCOT1_MOUSE,	-4.5	-5	-3.9	12	-5	-5.6	-4.4	4	0.6	-0.2	1.3	16	0.13666	1
Q545E6_MOUSE,TSN_MOUSE,	2	1.5	2.5	9	1.5	1	2	10	0.5	-0.2	1.1	19	0.14036	1
ODP2_MOUSE,	-1.1	-1.4	-0.8	26	-1.3	-1.6	-1	27	0.2	-0.1	0.6	53	0.1482	1
PYGB_MOUSE,A2AWQ5_MOUSE,Q3UGT5_MOUSE,Q3V3U0_MOUSE,	1.2	0.9	1.6	24	0.9	0.6	1.2	25	0.3	-0.2	0.8	49	0.14886	1
SEPT6_MOUSE,	2.9	2.6	3.3	20	3.2	2.9	3.6	27	-0.3	-0.8	0.2	47	0.15086	1
DIRA2_MOUSE,Q3UWU7_MOUSE,	0.9	0.5	1.3	15	0.5	0	0.9	13	0.4	-0.2	1	28	0.15349	1
CADM2_MOUSE,	-1.6	-1.8	-1.3	38	-1.8	-2	-1.5	40	0.2	-0.1	0.5	78	0.15462	1
A2AG27_MOUSE,	0.3	0	0.6	23	0.5	0.2	0.8	24	-0.3	-0.7	0.1	47	0.15524	1
USO1_MOUSE,	1.1	0.7	1.5	12	1.5	1	1.9	17	-0.4	-0.9	0.2	29	0.15531	1
ECHA_MOUSE,	-1	-1.5	-0.5	13	-1.4	-1.8	-1	14	0.4	-0.2	1	27	0.15895	1
Q6XMP4_MOUSE,SYAC_MOUSE,Q3TZ32_MOUSE,Q3UD67_MOUSE,	2.2	1.7	2.8	9	2.8	2.2	3.5	9	-0.6	-1.4	0.3	18	0.16394	1
ANK2_MOUSE,	1.7	1.5	2	43	2	1.7	2.3	35	-0.3	-0.7	0.2	78	0.16527	1
KC1A_MOUSE,Q3U772_MOUSE,	3	2.4	3.7	6	2.5	1.8	3.1	4	0.6	-0.3	1.5	10	0.16742	1
BRSK2_MOUSE,	0.4	-0.6	1.5	4	1.2	0.6	1.8	7	-0.8	-2	0.4	11	0.17799	1
PI42B_MOUSE,Q3UJ95_MOUSE,	1.6	0.9	2.3	4	0.8	0	1.7	2	0.7	-0.4	1.9	6	0.17866	1
AT1B2_MOUSE,Q3UR55_MOUSE,	-1.6	-1.8	-1.3	42	-1.7	-1.9	-1.5	46	0.2	-0.1	0.5	88	0.18	1
Q3UN10_MOUSE,Q80UI9_MOUSE,WFS1_MOUSE,Q3TDI2_MOUSE,	1.3	0.7	2.1	9	0.7	0.1	1.5	6	0.6	-0.3	1.5	15	0.18132	1
Q8C845_MOUSE,	0.1	-0.7	0.8	4	0.7	0	1.4	6	-0.6	-1.7	0.4	10	0.18498	1
SYNPR_MOUSE,	-0.4	-1	0.2	5	0.1	-0.5	0.7	9	-0.5	-1.3	0.3	14	0.18836	1
MK03_MOUSE,	2.6	2.2	2.9	30	2.8	2.5	3.1	28	-0.2	-0.6	0.2	58	0.1887	1
ATP5H_MOUSE,	-1.3	-1.6	-1.1	36	-1.5	-1.7	-1.3	40	0.2	-0.1	0.5	76	0.18929	1
B1AX52_MOUSE,AOFA_MOUSE,Q3TPD9_MOUSE,	-1.1	-1.4	-0.8	20	-1.3	-1.7	-1	20	0.3	-0.2	0.7	40	0.19019	1
B2RRE2_MOUSE,MY18A_MOUSE,	0.9	0.5	1.3	15	0.5	0.1	1	14	0.3	-0.2	0.9	29	0.19214	1
ABR_MOUSE,	1.6	1.1	2.1	7	1	0.2	1.8	5	0.6	-0.4	1.5	12	0.19442	1
Q8K0E2_MOUSE,EXOC3_MOUSE,	1.3	0.8	1.8	9	0.9	0.3	1.5	7	0.5	-0.3	1.2	16	0.20082	1
TPC_MOUSE,	-1.7	-2.5	-0.9	2	-2.3	-3	-1.7	4	0.6	-0.4	1.7	6	0.20098	1
Q3UIA9_MOUSE,FUMH_MOUSE,	-4.7	-5.3	-4.1	5	-5.2	-5.7	-4.6	8	0.5	-0.3	1.3	13	0.20145	1
SYT1_MOUSE,Q3TPT3_MOUSE,	-0.4	-0.6	-0.3	180	-0.5	-0.6	-0.4	175	0.1	-0.1	0.3	355	0.20186	1
Q545N7_MOUSE,KCRU_MOUSE,	-2.1	-2.4	-1.8	15	-2.4	-2.7	-2	17	0.2	-0.2	0.7	32	0.20583	1
CMC1_MOUSE,	-1.3	-1.5	-1.2	130	-1.4	-1.5	-1.2	167	0.1	-0.1	0.3	297	0.20689	1
XPO7_MOUSE,	0.9	0.5	1.3	16	1.2	0.8	1.6	20	-0.3	-0.9	0.2	36	0.21026	1
Q8BK37_MOUSE,Q5SWZ0_MOUSE,KPRB_MOUSE,	2.2	1.6	2.8	5	1.5	0.9	2.4	4	0.6	-0.4	1.5	9	0.21121	1
CBR1_MOUSE,B2RXY7_MOUSE,	2.7	2.1	3.2	9	3.2	2.5	3.8	8	-0.5	-1.4	0.3	17	0.21288	1
AUXI_MOUSE,B1AYC5_MOUSE,	1.7	1.4	2.1	16	2	1.6	2.4	19	-0.3	-0.8	0.2	35	0.21295	1
SH3G2_MOUSE,A2ALV3_MOUSE,	0.2	-0.3	0.7	9	0.5	0.1	1	13	-0.4	-1	0.3	22	0.21476	1
ETBR2_MOUSE,A1L151_MOUSE,	-1.4	-2.1	-0.7	4	-2	-2.6	-1.4	5	0.5	-0.4	1.4	9	0.21728	1
PP1A_MOUSE,	2.1	1.8	2.5	28	1.8	1.4	2.3	17	0.3	-0.2	0.8	45	0.2181	1
Q6ZQ37_MOUSE,Q3TNN9_MOUSE,Q6NVF8_MOUSE,	1.7	1	2.6	4	1.1	0.4	1.9	6	0.6	-0.4	1.8	10	0.21905	1
K2C1_MOUSE,	5.9	5.6	6.3	23	6.3	5.8	6.7	20	-0.3	-0.9	0.2	43	0.21943	1
Q3ULT2_MOUSE,ACTN4_MOUSE,	1.7	1.4	2	35	1.9	1.7	2.2	40	-0.2	-0.5	0.2	75	0.2246	1
ACADV_MOUSE,B1AR27_MOUSE,	0.6	0	1.4	8	0	-1	0.9	5	0.7	-0.5	1.9	13	0.22463	1
NMDE2_MOUSE,	-0.7	-1	-0.4	34	-0.5	-0.8	-0.3	39	-0.2	-0.5	0.2	73	0.22825	1
Q5DTG0_MOUSE,Q8BR88_MOUSE,	0.6	0.3	0.9	38	0.8	0.5	1.2	32	-0.2	-0.7	0.2	70	0.23516	1
B2RSI2_MOUSE,Q8CHA4_MOUSE,	1.3	0.3	2.2	4	0.5	-0.2	1.4	6	0.7	-0.6	1.9	10	0.2418	1
Q5DTI3_MOUSE,	-0.4	-0.7	-0.1	34	-0.6	-0.9	-0.3	31	0.2	-0.2	0.6	65	0.24224	1
TBB2C_MOUSE,	0.8	0.6	0.9	249	0.9	0.7	1	257	-0.1	-0.3	0.1	506	0.24401	1
RB11B_MOUSE,Q78ZJ8_MOUSE,	-0.5	-0.8	-0.2	23	-0.7	-1	-0.4	21	0.2	-0.2	0.6	44	0.24476	1
Q8C0E9_MOUSE,	2.3	1.9	2.6	10	1.9	1.5	2.4	8	0.3	-0.3	0.9	18	0.24553	1
Q3UW40_MOUSE,RL24_MOUSE,	-0.3	-1.2	0.6	3	0.3	-0.4	1.1	3	-0.6	-1.8	0.5	6	0.24793	1
Q059Q1_MOUSE,	1.2	0.9	1.4	47	1.3	1.1	1.6	47	-0.2	-0.5	0.2	94	0.2503	1
A3KML3_MOUSE,1433T_MOUSE,	1.9	1.6	2.3	17	1.7	1.4	2	17	0.2	-0.2	0.7	34	0.25065	1
GFAP_MOUSE,	0.3	-0.3	1.1	10	0.8	0.3	1.4	13	-0.5	-1.3	0.4	23	0.25092	1
CADM3_MOUSE,	-0.5	-0.7	-0.2	40	-0.6	-0.9	-0.4	50	0.2	-0.2	0.5	90	0.25127	1
SYUB_MOUSE,	-0.8	-1.5	0	5	-0.2	-0.9	0.6	3	-0.6	-1.7	0.5	8	0.25149	1
Q1MXF8_MOUSE,SCN2B_MOUSE,	-0.8	-1.1	-0.6	27	-1.1	-1.4	-0.7	17	0.2	-0.2	0.6	44	0.25249	1
S2542_MOUSE,	-1.2	-1.6	-0.8	14	-1.5	-2	-1.1	11	0.3	-0.3	0.9	25	0.25312	1
ERLN1_MOUSE,	0.2	-0.3	0.6	9	0.5	0	0.9	13	-0.3	-0.9	0.3	22	0.25322	1
Q545P0_MOUSE,Q3TSQ1_MOUSE,AT1B1_MOUSE,	-0.9	-1	-0.7	113	-1	-1.1	-0.8	120	0.1	-0.1	0.3	233	0.25482	1
ARRB1_MOUSE,	2.4	1.8	3	4	2.9	2.2	3.6	3	-0.5	-1.5	0.4	7	0.25647	1
VAT1L_MOUSE,	4.8	4.3	5.4	7	5.3	4.6	5.9	12	-0.5	-1.2	0.4	19	0.25775	1
ST32C_MOUSE,	1.8	1.4	2.2	12	2.1	1.6	2.6	9	-0.3	-1	0.3	21	0.2578	1
PPM1F_MOUSE,	1.4	0.6	2.3	3	0.8	0	1.6	3	0.6	-0.5	1.9	6	0.25882	1
Q3UIQ5_MOUSE,Q4FJX5_MOUSE,DHCR7_MOUSE,	-0.9	-1.9	0	2	-0.2	-1.1	0.7	3	-0.7	-2	0.6	5	0.26042	1
IGS21_MOUSE,	-0.5	-1	0.1	8	-0.1	-0.6	0.4	11	-0.4	-1.1	0.3	19	0.26081	1
Q58E64_MOUSE,EF1A1_MOUSE,Q3UA81_MOUSE,	1.7	1.4	2	26	1.5	1.3	1.8	33	0.2	-0.2	0.6	59	0.26152	1
ADT4_MOUSE,B2RTC8_MOUSE,	-1.5	-1.7	-1.3	56	-1.6	-1.8	-1.4	54	0.1	-0.1	0.4	110	0.26569	1
CAB39_MOUSE,Q8VDZ8_MOUSE,	1.6	1.1	2.1	13	1.3	0.9	1.7	12	0.3	-0.3	0.9	25	0.26693	1
2A5E_MOUSE,	1	0.7	1.4	20	1.2	0.9	1.6	17	-0.2	-0.7	0.2	37	0.27324	1
AT1B3_MOUSE,Q544Q7_MOUSE,	-1.2	-1.6	-0.9	14	-1.5	-1.9	-1.1	15	0.3	-0.2	0.8	29	0.27365	1
A2ARP8_MOUSE,MAP1A_MOUSE,	1.2	0.8	1.7	11	1	0.6	1.3	20	0.3	-0.3	0.8	31	0.27444	1
SCAI_MOUSE,	2.2	1.8	2.6	18	1.9	1.5	2.4	15	0.3	-0.3	0.8	33	0.27645	1
S39AA_MOUSE,	0.2	-0.7	1.1	2	-0.4	-1.2	0.3	3	0.6	-0.6	1.8	5	0.27785	1
C9K101_MOUSE,Q14DQ3_MOUSE,	1.1	0.6	1.7	6	0.8	0.4	1.2	12	0.3	-0.3	1	18	0.27954	1
GHC2_MOUSE,	-1.3	-1.6	-1	23	-1.5	-1.8	-1.2	24	0.2	-0.2	0.6	47	0.28114	1
A2A6U3_MOUSE,SEPT9_MOUSE,	2.1	1.1	3	4	2.6	2.1	3.2	6	-0.6	-1.6	0.5	10	0.28267	1
B6ZHC9_MOUSE,A2AUK5_MOUSE,	1.4	1.2	1.7	33	1.6	1.3	1.9	33	-0.2	-0.6	0.2	66	0.28411	1
TBA1C_MOUSE,Q52L87_MOUSE,	0.7	0.6	0.9	248	0.8	0.6	0.9	268	-0.1	-0.2	0.1	516	0.28757	1
EXOC2_MOUSE,Q5SUZ6_MOUSE,	1.2	0.5	1.8	6	0.6	-0.1	1.4	9	0.5	-0.5	1.5	15	0.29032	1
MK01_MOUSE,	2.6	2.3	2.9	42	2.7	2.5	3	38	-0.2	-0.5	0.2	80	0.29291	1
Q80VK3_MOUSE,EXOC5_MOUSE,	1	0.4	1.6	9	1.4	0.8	2.1	7	-0.4	-1.3	0.4	16	0.29333	1
B1AV07_MOUSE,GPC4_MOUSE,	-0.8	-1.8	0.3	3	-0.1	-0.9	0.6	4	-0.7	-1.9	0.6	7	0.29372	1
Q4FJQ0_MOUSE,RAB7A_MOUSE,	-0.6	-0.9	-0.3	19	-0.8	-1	-0.5	27	0.2	-0.2	0.6	46	0.29696	1
ARM10_MOUSE,	-0.7	-1.2	-0.2	11	-0.4	-0.8	0	15	-0.3	-0.9	0.3	26	0.29827	1
Q68FG2_MOUSE,	1.3	1.1	1.4	152	1.2	1.1	1.4	155	0.1	-0.1	0.2	307	0.30038	1
Q3U1V3_MOUSE,ARBK1_MOUSE,Q7TS64_MOUSE,	2.2	1.7	2.7	9	1.7	0.7	2.7	5	0.6	-0.6	1.7	14	0.30054	1
PHIPL_MOUSE,	3.9	3.1	4.7	2	3.4	2.6	4.2	3	0.6	-0.6	1.7	5	0.30195	1
A2ASW3_MOUSE,Q571A8_MOUSE,A2ASW4_MOUSE,RPGF4_MOUSE,	1.4	0.4	2.4	3	0.8	0	1.6	3	0.6	-0.6	1.9	6	0.30261	1
Q9QZ83_MOUSE,	1.7	1.5	1.8	109	1.8	1.6	1.9	127	-0.1	-0.3	0.1	236	0.30582	1
Q3UC51_MOUSE,Q8C4P7_MOUSE,	-0.3	-0.7	0.1	15	-0.5	-0.9	-0.2	17	0.2	-0.3	0.7	32	0.30789	1
PHYIP_MOUSE,B9EIC7_MOUSE,	3.4	2.5	4.7	7	2.9	2.4	3.4	10	0.5	-0.5	1.9	17	0.3096	1
CTBP1_MOUSE,	1.9	1	2.7	5	1.3	0.6	2	5	0.6	-0.6	1.7	10	0.3121	1
ACOT9_MOUSE,	-0.5	-1.3	0.4	4	-1.1	-2.1	-0.1	3	0.6	-0.7	1.9	7	0.31312	1
Q5D0A4_MOUSE,Q497P1_MOUSE,STX1A_MOUSE,	-0.8	-1	-0.6	77	-0.9	-1.1	-0.7	73	0.1	-0.1	0.3	150	0.31527	1
RS8_MOUSE,Q497E9_MOUSE,	0.5	0	0.9	11	0.9	0.1	1.6	8	-0.4	-1.2	0.4	19	0.31655	1
CNTN4_MOUSE,	-0.6	-1.6	0.5	3	0.1	-0.8	1.1	3	-0.7	-2.1	0.7	6	0.3201	1
SERA_MOUSE,	0.5	0	1.1	10	0.9	0.3	1.4	9	-0.3	-1.1	0.4	19	0.32201	1
VPS52_MOUSE,Q3V3A4_MOUSE,	1.3	0.5	2	7	0.8	0.2	1.5	8	0.5	-0.6	1.4	15	0.32264	1
Q3U026_MOUSE,Q3UME9_MOUSE,MOGS_MOUSE,	-0.1	-1.1	1	3	-0.7	-1.5	0.1	5	0.6	-0.7	1.9	8	0.32385	1
Q3ULN8_MOUSE,2A5A_MOUSE,	1	0.5	1.5	7	1.4	0.6	2.1	5	-0.4	-1.3	0.5	12	0.32388	1
RAB6A_MOUSE,Q0PD54_MOUSE,	-0.1	-0.4	0.3	16	-0.3	-0.6	0.1	17	0.2	-0.3	0.7	33	0.32774	1
KPCG_MOUSE,Q3UN66_MOUSE,	0.8	0.5	1	50	0.6	0.4	0.9	55	0.1	-0.2	0.4	105	0.32791	1
A2RT70_MOUSE,TENR_MOUSE,	1.9	1.6	2.3	33	2.1	1.8	2.5	23	-0.2	-0.6	0.3	56	0.32827	1
CLD11_MOUSE,	-3.8	-4	-3.6	42	-3.9	-4.2	-3.7	49	0.1	-0.2	0.4	91	0.32911	1
NFASC_MOUSE,	-0.6	-0.8	-0.4	78	-0.7	-0.9	-0.5	63	0.1	-0.2	0.4	141	0.33337	1
Q2UZW7_MOUSE,MARE3_MOUSE,	1.2	0.5	1.9	6	1.6	1	2.3	5	-0.4	-1.4	0.5	11	0.33462	1
SODM_MOUSE,Q4FJX9_MOUSE,	-6	-6.6	-5.3	4	-6.4	-6.9	-5.8	6	0.4	-0.5	1.2	10	0.33477	1
CC127_MOUSE,	-1.3	-1.8	-0.8	10	-2	-3	-0.6	4	0.7	-0.7	1.8	14	0.3349	1
UCRI_MOUSE,	-1.4	-1.6	-1.1	34	-1.5	-1.8	-1.3	34	0.1	-0.2	0.5	68	0.33582	1
Q3UMT5_MOUSE,	2	1.5	2.5	11	2.3	1.8	2.9	9	-0.3	-1.2	0.4	20	0.33777	1
Q5SX53_MOUSE,M2OM_MOUSE,	-1.3	-1.5	-1.1	50	-1.4	-1.6	-1.2	42	0.1	-0.2	0.4	92	0.33952	1
SCPDH_MOUSE,	-0.4	-0.7	0	15	-0.6	-0.9	-0.2	16	0.2	-0.3	0.7	31	0.33952	1
B1AQX9_MOUSE,	-0.1	-0.3	0.1	66	-0.2	-0.4	0	67	0.1	-0.2	0.4	133	0.33987	1
EXOC4_MOUSE,Q69ZD1_MOUSE,	0.8	0.3	1.4	8	1.1	0.7	1.6	11	-0.3	-1	0.4	19	0.34013	1
Q5XJF6_MOUSE,Q3U561_MOUSE,	0.8	0.1	1.6	3	0.4	-0.4	1.1	3	0.5	-0.6	1.5	6	0.34025	1
ATPA_MOUSE,	-1.6	-1.8	-1.4	69	-1.7	-1.9	-1.5	70	0.1	-0.2	0.4	139	0.34115	1
CTNA2_MOUSE,	1	0.7	1.3	34	0.8	0.5	1.1	28	0.2	-0.2	0.6	62	0.34256	1
GRM3_MOUSE,	-1	-1.3	-0.7	38	-1.2	-1.4	-0.9	43	0.2	-0.2	0.5	81	0.34348	1
B5TVM2_MOUSE,	-0.9	-1.5	-0.3	8	-0.6	-1.1	-0.1	9	-0.3	-1.1	0.4	17	0.3485	1
Q3UHH0_MOUSE,AT2B2_MOUSE,Q3UHJ3_MOUSE,	-1.1	-1.3	-1	170	-1.2	-1.3	-1	155	0.1	-0.1	0.2	325	0.34935	1
CAND1_MOUSE,	1.1	1	1.3	88	1.2	1.1	1.4	109	-0.1	-0.3	0.1	197	0.34936	1
Q6ZQ49_MOUSE,Q3UHK5_MOUSE,AT1A2_MOUSE,	-1.3	-1.4	-1.2	370	-1.4	-1.5	-1.2	394	0.1	-0.1	0.2	764	0.34951	1
D1LYT3_MOUSE,GBRB2_MOUSE,A6H6R7_MOUSE,	-0.3	-0.7	0	19	-0.5	-0.9	-0.2	24	0.2	-0.3	0.7	43	0.3497	1
NDRG4_MOUSE,	1.1	0.7	1.6	12	1.4	0.9	1.9	8	-0.3	-1	0.4	20	0.35002	1
Q3UBU0_MOUSE,	0.7	0.2	1.3	8	1.1	0.5	1.7	5	-0.4	-1.2	0.5	13	0.35022	1
RUFY3_MOUSE,	1.5	1.1	1.8	13	1.2	0.8	1.7	11	0.3	-0.3	0.8	24	0.35094	1
NIPS1_MOUSE,Q5SVF7_MOUSE,	-4	-4.8	-3.2	3	-3.5	-4.2	-2.9	3	-0.5	-1.5	0.6	6	0.35226	1
A2A7X3_MOUSE,UBE2O_MOUSE,	1.3	0.9	1.7	15	1.6	1.1	2	13	-0.3	-0.9	0.3	28	0.35309	1
Q3TED3_MOUSE,Q3V117_MOUSE,ACLY_MOUSE,A2A4H2_MOUSE,	2.3	1.9	2.6	22	2.1	1.8	2.4	27	0.2	-0.3	0.6	49	0.35391	1
RGS7_MOUSE,Q80XD3_MOUSE,	0.5	-0.3	1.3	3	0.1	-0.6	0.7	6	0.5	-0.6	1.5	9	0.3558	1
Q2M4G8_MOUSE,PTN9_MOUSE,	1.5	1.1	2.4	7	2	1.4	2.9	6	-0.4	-1.4	0.5	13	0.35815	1
TTYH1_MOUSE,	-1.6	-2	-1.3	17	-1.8	-2.2	-1.4	14	0.2	-0.3	0.7	31	0.35974	1
S12A5_MOUSE,	-0.6	-0.8	-0.4	99	-0.7	-0.9	-0.5	101	0.1	-0.1	0.3	200	0.36001	1
Q3THJ0_MOUSE,RL18A_MOUSE,	0.3	-0.2	0.8	8	0	-0.5	0.5	9	0.3	-0.4	0.9	17	0.36004	1
Q542T7_MOUSE,RAB3C_MOUSE,	0.3	0	0.5	35	0.1	-0.2	0.4	31	0.2	-0.2	0.5	66	0.36131	1
MGST3_MOUSE,	-1.4	-1.7	-1	24	-1.2	-1.5	-0.8	23	-0.2	-0.7	0.3	47	0.3622	1
B2RQQ5_MOUSE,	1.4	1	1.8	21	1.2	0.9	1.6	24	0.2	-0.3	0.7	45	0.3641	1
STXB5_MOUSE,	-0.6	-1.1	0	14	-0.9	-1.4	-0.3	10	0.3	-0.4	1.1	24	0.36532	1
RAB6B_MOUSE,Q0PD53_MOUSE,	-0.1	-0.5	0.2	19	-0.3	-0.7	0	18	0.2	-0.3	0.7	37	0.36592	1
A5XDA7_MOUSE,ROCK2_MOUSE,	1.9	1.5	2.4	16	2.2	1.7	2.8	13	-0.3	-1	0.4	29	0.37064	1
SCMC2_MOUSE,	-1.3	-1.7	-0.8	9	-1.5	-2.1	-1	11	0.3	-0.4	1	20	0.37241	1
A8XUV6_MOUSE,TCPA2_MOUSE,	1.7	1.2	2.1	18	1.4	0.8	1.9	15	0.3	-0.4	1	33	0.37267	1
KAD3_MOUSE,Q9D8W6_MOUSE,	-1	-1.8	-0.3	4	-0.5	-1.5	0.5	3	-0.6	-1.8	0.7	7	0.37405	1
Q3TEY5_MOUSE,	-1.6	-1.7	-1.4	135	-1.7	-1.8	-1.5	140	0.1	-0.1	0.3	275	0.37436	1
DPP10_MOUSE,	-0.5	-0.8	-0.2	34	-0.6	-0.9	-0.4	37	0.1	-0.2	0.5	71	0.37654	1
ACTZ_MOUSE,	1.2	0.9	1.6	15	1	0.6	1.4	14	0.2	-0.3	0.7	29	0.37702	1
GDIR1_MOUSE,	3.5	3.1	3.9	17	3.8	3.2	4.4	12	-0.3	-1	0.4	29	0.37797	1
Q542X7_MOUSE,TCPB_MOUSE,	1.8	0.4	2.9	6	1.2	0.6	1.8	6	0.6	-0.9	1.8	12	0.37955	1
DLG4_MOUSE,	-1.1	-1.2	-0.9	102	-1	-1.2	-0.8	94	-0.1	-0.3	0.1	196	0.37966	1
SRR_MOUSE,	1.5	1.2	1.9	13	1.3	0.9	1.7	9	0.2	-0.3	0.7	22	0.3852	1
VAMP2_MOUSE,Q8CHR4_MOUSE,O35619_MOUSE,B0QZN5_MOUSE,	0.4	-0.1	0.9	8	0.1	-0.4	0.6	9	0.3	-0.4	1	17	0.38609	1
Q8VI68_MOUSE,Q3UUB3_MOUSE,CAD10_MOUSE,	-0.8	-1.6	0	2	-1.3	-2.2	-0.4	4	0.5	-0.7	1.7	6	0.3864	1
PRS10_MOUSE,Q14AQ1_MOUSE,	0.1	-0.6	0.9	5	0.6	-0.4	1.7	3	-0.5	-1.8	0.8	8	0.38847	1
GLNA_MOUSE,	-3.3	-4.1	-2.8	6	-3.8	-4.6	-3	3	0.4	-0.7	1.4	9	0.39128	1
AP3B1_MOUSE,	1.4	0.8	2	4	1.7	1.2	2.4	5	-0.3	-1.2	0.5	9	0.39149	1
ADDA_MOUSE,Q8K232_MOUSE,	1.4	0.9	1.9	10	1.7	1.1	2.2	9	-0.3	-1	0.4	19	0.39238	1
Q499X4_MOUSE,Q3TXD3_MOUSE,VAT1_MOUSE,Q5RKP0_MOUSE,	2.2	1.7	2.7	12	2	1.6	2.4	10	0.2	-0.4	0.8	22	0.3933	1
LMNB1_MOUSE,	0.2	-0.5	0.8	6	-0.3	-1.4	0.7	3	0.5	-0.8	1.8	9	0.39407	1
TNPO3_MOUSE,Q6DI95_MOUSE,	1.1	0.5	1.6	7	1.4	0.9	1.8	12	-0.3	-0.9	0.4	19	0.39418	1
RB39B_MOUSE,Q0PD14_MOUSE,	-0.4	-0.9	0.2	6	-0.7	-1.2	-0.1	9	0.3	-0.4	1	15	0.39444	1
FRAP_MOUSE,Q2KHT0_MOUSE,	1.1	0.6	1.6	15	0.8	0.3	1.4	11	0.3	-0.4	1	26	0.39491	1
ACBG1_MOUSE,	1	0.5	1.5	9	0.7	0.1	1.3	8	0.3	-0.5	1.1	17	0.39493	1
NSF_MOUSE,	1.4	1.3	1.6	167	1.3	1.2	1.5	113	0.1	-0.1	0.3	280	0.39644	1
NCAM1_MOUSE,	-0.6	-0.8	-0.5	128	-0.7	-0.9	-0.6	127	0.1	-0.1	0.3	255	0.39651	1
Q14BT4_MOUSE,DDRGK_MOUSE,	0.2	-0.4	0.7	6	-0.2	-0.9	0.6	6	0.4	-0.5	1.3	12	0.39815	1
VGLU2_MOUSE,	0.4	0	0.7	23	0.1	-0.3	0.6	15	0.2	-0.3	0.8	38	0.39871	1
Q8CGP4_MOUSE,	0.3	-0.3	0.9	5	0.6	0.2	1.1	9	-0.3	-1	0.4	14	0.39993	1
PI3R4_MOUSE,B2RXR2_MOUSE,	1.4	0.8	2.1	7	1.1	0.5	1.7	5	0.4	-0.6	1.3	12	0.40034	1
H2A2A_MOUSE,B2RWH3_MOUSE,Q149V4_MOUSE,H2A2C_MOUSE,Q64426_MOUSE,	0.3	-0.3	1.1	7	0.7	0.2	1.2	11	-0.4	-1.2	0.5	18	0.40244	1
Q9D4I9_MOUSE,Q0PD32_MOUSE,RAB23_MOUSE,	0.4	-0.2	1.1	5	0	-0.8	0.8	4	0.4	-0.6	1.4	9	0.40424	1
B2M0S2_MOUSE,	0.2	-0.5	0.9	6	0.7	-0.6	1.5	5	-0.5	-1.6	1	11	0.40426	1
Q76MX9_MOUSE,Q3UPD5_MOUSE,Q3UYQ0_MOUSE,Q3TI27_MOUSE,	2.5	2	3.1	9	2.9	2.3	3.4	6	-0.3	-1.1	0.5	15	0.40615	1
Q3UJS0_MOUSE,RL8_MOUSE,	-0.1	-0.6	0.4	9	-0.4	-1	0.2	6	0.3	-0.5	1.1	15	0.40702	1
BACH_MOUSE,	0.9	0.3	1.6	5	0.5	-0.2	1.4	4	0.4	-0.6	1.4	9	0.40708	1
Q9D6D0_MOUSE,	-1.2	-1.5	-0.9	22	-1.3	-1.7	-1	16	0.2	-0.3	0.6	38	0.40819	1
A2AQ07_MOUSE,	0.8	0.4	1.1	26	0.9	0.6	1.2	28	-0.2	-0.6	0.3	54	0.40914	1
LDHB_MOUSE,	-2.1	-2.5	-1.7	10	-2.3	-2.8	-1.9	9	0.2	-0.3	0.8	19	0.40971	1
OCAD1_MOUSE,	-1.3	-1.6	-1	26	-1.4	-1.7	-1.2	32	0.1	-0.2	0.5	58	0.40988	1
HNRPC_MOUSE,Q3U6P5_MOUSE,	0.5	-0.2	1.2	4	0	-0.9	1	3	0.5	-0.7	1.6	7	0.4104	1
B1AUD0_MOUSE,Q6PDN6_MOUSE,Q8R0Q6_MOUSE,TSN7_MOUSE,	-0.9	-1.3	-0.4	13	-1.1	-1.4	-0.7	17	0.2	-0.3	0.7	30	0.41041	1
TMX3_MOUSE,	-0.2	-1.1	0.9	3	0.4	-0.6	1.4	3	-0.6	-2	0.8	6	0.41087	1
GNAI3_MOUSE,	-1.2	-1.5	-0.9	24	-1.3	-1.6	-1	25	0.2	-0.2	0.6	49	0.41106	1
Q3TYE5_MOUSE,LSAMP_MOUSE,	-0.2	-0.5	0	35	-0.4	-0.6	-0.1	34	0.1	-0.2	0.5	69	0.41301	1
CREL1_MOUSE,A8C1T7_MOUSE,	-0.2	-1	0.5	4	-0.6	-1.3	0.1	4	0.4	-0.6	1.4	8	0.41329	1
FXL16_MOUSE,B2RPY3_MOUSE,	1.8	1.2	2.3	8	1.5	1	2	7	0.3	-0.4	1	15	0.41354	1
ENOG_MOUSE,Q545V3_MOUSE,Q3UJ20_MOUSE,	1.4	1.1	1.7	26	1.2	0.9	1.6	21	0.2	-0.3	0.6	47	0.416	1
ABHD3_MOUSE,	-0.3	-1	0.4	5	-0.7	-1.7	0.1	3	0.4	-0.7	1.6	8	0.41649	1
A2ASB2_MOUSE,BIEA_MOUSE,	1.8	1.3	2.5	6	1.6	0.9	2.1	7	0.3	-0.5	1.2	13	0.41781	1
KPYM_MOUSE,	-3	-3.5	-2.5	14	-2.7	-3.4	-1.9	7	-0.3	-1.2	0.6	21	0.41796	1
C9K0Y5_MOUSE,	-1.1	-1.3	-0.8	52	-1.2	-1.4	-0.9	62	0.1	-0.2	0.4	114	0.41854	1
GDAP1_MOUSE,Q3UEX4_MOUSE,	-1.3	-1.5	-1	31	-1.4	-1.7	-1.1	26	0.1	-0.2	0.5	57	0.41926	1
Q3TYL9_MOUSE,CN37_MOUSE,Q3TYV5_MOUSE,	-4.2	-4.4	-3.9	31	-4.3	-4.5	-4	33	0.1	-0.2	0.5	64	0.42058	1
A2AI77_MOUSE,CNKR2_MOUSE,	0	-0.7	0.7	7	-0.6	-1.6	0.7	4	0.5	-0.8	1.8	11	0.42186	1
CG020_MOUSE,	0.7	0	1.5	4	1.1	0.4	2	3	-0.4	-1.6	0.7	7	0.42427	1
RS3A_MOUSE,Q564F3_MOUSE,Q3UAC2_MOUSE,Q3U5P8_MOUSE,	0.7	0.4	1.1	14	0.9	0.6	1.3	17	-0.2	-0.6	0.3	31	0.42563	1
Q5M8Q0_MOUSE,RL15_MOUSE,Q3U7D2_MOUSE,	0.7	0.1	1.3	7	0.3	-0.3	1	7	0.3	-0.5	1.2	14	0.42586	1
Q545X8_MOUSE,Q3UXQ6_MOUSE,Q545F8_MOUSE,RS4X_MOUSE,	0.2	-0.1	0.6	18	0.4	0	0.8	12	-0.2	-0.7	0.3	30	0.42848	1
MFF_MOUSE,	-1.1	-1.4	-0.8	35	-1.2	-1.5	-0.9	32	0.1	-0.2	0.5	67	0.42915	1
AVL9_MOUSE,	1.5	1	1.9	9	1.3	0.8	1.7	9	0.2	-0.4	0.8	18	0.43162	1
A4PI81_MOUSE,CAPS2_MOUSE,	1	0.5	1.4	10	1.2	0.8	1.6	13	-0.2	-0.8	0.4	23	0.43333	1
Q3TEX7_MOUSE,MFN2_MOUSE,	-1.1	-1.4	-0.8	29	-1.3	-1.5	-1	27	0.1	-0.2	0.5	56	0.43351	1
SUCA_MOUSE,	-1.3	-1.7	-0.8	9	-1.5	-1.9	-1	8	0.2	-0.4	0.8	17	0.43411	1
Q3TX70_MOUSE,STX6_MOUSE,Q3UA21_MOUSE,	0.1	-0.4	0.6	10	-0.2	-1.2	0.6	6	0.4	-0.6	1.4	16	0.43476	1
CCG2_MOUSE,Q3ZB20_MOUSE,	-1.6	-2.5	-0.7	4	-2	-2.8	-1.3	5	0.4	-0.7	1.6	9	0.43486	1
CPT1A_MOUSE,Q7TQD5_MOUSE,A8ASF5_MOUSE,Q3UGT1_MOUSE,	-1.2	-1.8	-0.6	6	-1.5	-2.3	-0.8	6	0.3	-0.6	1.3	12	0.43508	1
SMAP1_MOUSE,	2.1	1.3	3.1	2	1.7	1	2.4	5	0.4	-0.7	1.6	7	0.43536	1
RL14_MOUSE,Q9CWK0_MOUSE,	0.5	-0.1	1.1	10	0.8	0.2	1.4	9	-0.3	-1.1	0.5	19	0.43751	1
HAX1_MOUSE,B9EJR4_MOUSE,	-0.3	-1.4	0.7	2	0.2	-0.6	0.9	7	-0.5	-1.7	0.8	9	0.43943	1
T132A_MOUSE,	-0.4	-1.4	0.6	3	0.1	-0.7	0.9	5	-0.5	-1.8	0.8	8	0.44003	1
SC31A_MOUSE,	1.6	1	2.2	7	1.3	0.8	1.9	8	0.3	-0.5	1.1	15	0.44005	1
ITM2C_MOUSE,Q3U0F3_MOUSE,	0.1	-0.8	1	3	-0.3	-1.3	0.6	3	0.5	-0.8	1.8	6	0.44075	1
IP3KA_MOUSE,	1.1	0.6	1.5	12	1.3	0.9	1.7	11	-0.2	-0.8	0.4	23	0.44095	1
Q3UJZ7_MOUSE,Q3USZ5_MOUSE,NOP56_MOUSE,A2APD6_MOUSE,	1.2	0.2	2.2	2	1.7	0.8	2.5	2	-0.5	-1.8	0.9	4	0.44159	1
Q80VZ2_MOUSE,	-1	-1.3	-0.6	24	-1.1	-1.5	-0.8	24	0.2	-0.3	0.6	48	0.44357	1
NOE1_MOUSE,Q8R357_MOUSE,	-1.5	-2.2	-0.9	4	-1.9	-2.6	-1.2	4	0.4	-0.6	1.3	8	0.4438	1
Q570Z8_MOUSE,	1.5	1.1	1.8	21	1.3	1	1.6	24	0.2	-0.3	0.6	45	0.44388	1
Q80UN0_MOUSE,UBP14_MOUSE,	2.2	1.3	3.3	3	1.7	0.9	2.6	3	0.5	-0.8	1.9	6	0.44468	1
COPA_MOUSE,Q8BTF0_MOUSE,Q63ZW9_MOUSE,	1.4	0.9	1.9	14	1.2	0.7	1.7	14	0.2	-0.4	0.9	28	0.44772	1
KAP3_MOUSE,	-0.8	-1.1	-0.4	19	-0.9	-1.3	-0.6	18	0.2	-0.3	0.6	37	0.44916	1
PGRC2_MOUSE,	-0.2	-0.8	0.4	6	0.1	-0.4	0.6	9	-0.3	-1	0.5	15	0.44916	1
AGK_MOUSE,	-1.7	-2	-1.4	26	-1.8	-2.1	-1.5	27	0.1	-0.2	0.5	53	0.45001	1
RAB14_MOUSE,Q50HX2_MOUSE,Q50HX4_MOUSE,	-0.5	-0.7	-0.3	45	-0.6	-0.9	-0.4	38	0.1	-0.2	0.4	83	0.45116	1
RBGPR_MOUSE,	1.3	0.6	2.2	6	1	0.2	1.7	7	0.4	-0.7	1.5	13	0.4536	1
Q3TCI7_MOUSE,Q3UDU4_MOUSE,Q3TI99_MOUSE,Q564E2_MOUSE,LDHA_MOUSE,	-1.8	-2.3	-1.4	8	-2.1	-2.6	-1.6	5	0.3	-0.5	1	13	0.4539	1
LRRC7_MOUSE,	-0.8	-1.5	-0.2	8	-1.2	-1.7	-0.5	8	0.3	-0.6	1.2	16	0.45536	1
MADD_MOUSE,A2AGR0_MOUSE,	2	1.4	2.5	13	1.7	1.3	2.2	16	0.2	-0.5	0.9	29	0.45604	1
KCC2D_MOUSE,	-0.8	-1	-0.6	79	-0.8	-1	-0.6	90	-0.1	-0.3	0.2	169	0.45628	1
Q4V9W8_MOUSE,RAB4B_MOUSE,	-0.2	-0.7	0.4	7	0.1	-0.4	0.5	10	-0.2	-0.9	0.4	17	0.4564	1
Q80YU5_MOUSE,MOG_MOUSE,Q3UY21_MOUSE,	-4	-4.3	-3.7	17	-4.2	-4.5	-3.8	18	0.1	-0.3	0.5	35	0.45726	1
FLOT1_MOUSE,Q540I4_MOUSE,	0	-0.2	0.3	33	-0.1	-0.4	0.2	29	0.1	-0.3	0.5	62	0.4579	1
Q3TQ33_MOUSE,Q3UPG0_MOUSE,	1.4	0.7	2.1	4	1.7	1.1	2.4	4	-0.3	-1.3	0.6	8	0.45926	1
CAP1_MOUSE,Q3UVJ2_MOUSE,Q3U0U5_MOUSE,Q8BPT7_MOUSE,	1.5	1.2	1.8	30	1.3	1	1.6	23	0.1	-0.3	0.6	53	0.46039	1
SRGP2_MOUSE,	1.6	1	2.1	8	1.3	0.9	1.7	15	0.2	-0.4	0.9	23	0.46098	1
SNG3_MOUSE,	0.9	0.6	1.3	15	0.8	0.4	1.1	13	0.2	-0.3	0.7	28	0.46342	1
SF3B1_MOUSE,	1.1	0.5	1.6	11	1.3	0.8	1.8	12	-0.3	-1	0.5	23	0.4656	1
Q91V35_MOUSE,	-0.6	-1.1	-0.1	14	-0.8	-1.2	-0.3	16	0.2	-0.4	0.8	30	0.46707	1
Q09J72_MOUSE,Q542T4_MOUSE,	-4.4	-4.9	-3.9	14	-4.2	-4.6	-3.8	14	-0.2	-0.8	0.4	28	0.46714	1
Q3UVV3_MOUSE,Q5SYH5_MOUSE,OMGP_MOUSE,	-0.4	-0.8	0.1	11	-0.2	-0.6	0.2	14	-0.2	-0.8	0.4	25	0.46754	1
EMD_MOUSE,Q3UJP3_MOUSE,	0	-0.5	0.4	9	0.2	-0.3	0.6	9	-0.2	-0.8	0.4	18	0.46773	1
A2AMR5_MOUSE,CNTFR_MOUSE,C9K0Z6_MOUSE,	-0.8	-1.3	-0.2	8	-0.5	-1	0.1	9	-0.3	-1	0.5	17	0.46833	1
CUL3_MOUSE,Q6ZQ84_MOUSE,	2.1	1.7	2.6	17	1.9	1.5	2.4	16	0.2	-0.4	0.8	33	0.46837	1
CD47_MOUSE,Q3U967_MOUSE,	-0.5	-0.7	-0.2	41	-0.6	-0.9	-0.3	35	0.1	-0.2	0.4	76	0.46967	1
H4_MOUSE,B2RTM0_MOUSE,	1.3	0.9	1.7	11	1.1	0.7	1.5	14	0.2	-0.4	0.7	25	0.46969	1
IQEC1_MOUSE,	-0.5	-0.8	-0.2	35	-0.6	-0.8	-0.3	41	0.1	-0.2	0.5	76	0.47046	1
RAB35_MOUSE,Q3U0T9_MOUSE,	-0.5	-0.8	-0.2	21	-0.7	-1	-0.3	20	0.1	-0.3	0.6	41	0.4706	1
TRAP1_MOUSE,Q922Z3_MOUSE,Q3TK29_MOUSE,Q3UPJ8_MOUSE,Q3TSG8_MOUSE,	0.5	-0.1	1	9	0.1	-0.7	1	5	0.3	-0.6	1.4	14	0.47092	1
AP3B2_MOUSE,	1.5	1.2	1.7	46	1.6	1.3	1.9	40	-0.1	-0.5	0.2	86	0.47118	1
MYH9_MOUSE,	1.4	1.1	1.7	33	1.5	1.2	1.8	43	-0.1	-0.5	0.2	76	0.47457	1
B2RWI2_MOUSE,Q80UJ8_MOUSE,LACTB_MOUSE,	0.1	-1	0.8	5	-0.5	-1.4	0.4	4	0.5	-0.9	1.7	9	0.47483	1
HIBCH_MOUSE,	-0.2	-1.3	0.8	3	-0.7	-1.6	0.2	4	0.5	-0.9	1.8	7	0.4769	1
Q99K69_MOUSE,	1.4	1.1	1.7	30	1.5	1.2	1.8	29	-0.1	-0.5	0.2	59	0.47768	1
CR019_MOUSE,	-0.7	-1.4	0	5	-1.1	-1.8	-0.4	4	0.3	-0.6	1.3	9	0.47776	1
EFHA2_MOUSE,	-1.7	-2.3	-1.2	10	-2	-2.5	-1.5	9	0.2	-0.5	0.9	19	0.47818	1
CEND_MOUSE,	-1.6	-1.8	-1.3	32	-1.7	-1.9	-1.4	37	0.1	-0.2	0.4	69	0.48064	1
TIGAR_MOUSE,B2RWB7_MOUSE,	1	0.4	1.8	5	1.4	0.7	2.1	4	-0.3	-1.3	0.7	9	0.48203	1
FAK2_MOUSE,Q8C2G0_MOUSE,	1.6	1.1	2.4	13	1.9	1.3	2.8	14	-0.3	-1.3	0.7	27	0.48232	1
LANC2_MOUSE,	1.3	0.8	1.7	16	1.4	1.1	1.8	15	-0.2	-0.7	0.4	31	0.48322	1
Q5SUD5_MOUSE,SCO1_MOUSE,	-1.1	-2	-0.3	3	-1.5	-2.3	-0.7	2	0.4	-0.8	1.5	5	0.48482	1
API5_MOUSE,Q3U517_MOUSE,Q3UYQ4_MOUSE,	0.9	0.3	1.5	6	1.2	0.4	2	6	-0.3	-1.3	0.7	12	0.48551	1
SNPH_MOUSE,	-1.4	-1.7	-1.1	22	-1.5	-1.9	-1.2	22	0.1	-0.3	0.6	44	0.48575	1
BCS1_MOUSE,	-1.3	-1.6	-1	24	-1.2	-1.5	-0.8	21	-0.1	-0.6	0.3	45	0.48668	1
ARPC2_MOUSE,	3.1	2.5	3.7	8	2.7	2.2	3.6	4	0.3	-0.7	1.1	12	0.48727	1
RTN3_MOUSE,	0.3	0.1	0.5	50	0.2	0	0.5	47	0.1	-0.2	0.4	97	0.48733	1
TTYH3_MOUSE,	-0.6	-1.3	0.1	4	-0.9	-1.6	-0.2	4	0.3	-0.6	1.3	8	0.48895	1
Q8JZU2_MOUSE,	-1.5	-1.9	-1.1	12	-1.6	-2	-1.3	12	0.2	-0.3	0.7	24	0.48945	1
NPTX1_MOUSE,Q3UST4_MOUSE,A2ACL9_MOUSE,	0.3	-0.3	0.8	7	0.5	0	1	7	-0.2	-0.9	0.5	14	0.49145	1
TM40L_MOUSE,	-1.1	-1.5	-0.7	12	-1.3	-1.7	-0.9	12	0.2	-0.4	0.7	24	0.49169	1
IPO5_MOUSE,	0.9	0.6	1.2	29	0.8	0.5	1.1	34	0.1	-0.3	0.5	63	0.49179	1
UN13A_MOUSE,	1.1	0.6	1.6	17	1.3	0.8	1.9	12	-0.2	-1	0.5	29	0.495	1
B8JK04_MOUSE,	0.7	0.5	0.9	94	0.8	0.6	1	86	-0.1	-0.3	0.2	180	0.49757	1
Q7JCY9_MOUSE,Q7JD01_MOUSE,ATP6_MOUSE,B9V161_MOUSE,Q3V257_MOUSE,Q3TKD9_MOUSE,Q3V2U3_MOUSE,	-1.6	-2.8	-0.4	2	-1.2	-1.8	-0.5	3	-0.4	-1.9	0.9	5	0.49766	1
TMM11_MOUSE,	-1	-1.6	-0.3	4	-1.2	-1.8	-0.7	5	0.3	-0.6	1.1	9	0.50066	1
Q3TNN8_MOUSE,	1.2	0.4	1.9	6	1.5	0.7	2.3	5	-0.3	-1.5	1	11	0.50173	1
C2C2L_MOUSE,	0.5	0.2	0.9	21	0.7	0.3	1	20	-0.1	-0.6	0.3	41	0.50186	1
Q3TI05_MOUSE,Q52KG9_MOUSE,Q3TI62_MOUSE,TCPZ_MOUSE,Q3TIX8_MOUSE,	1.5	1.1	1.9	12	1.3	0.8	1.8	10	0.2	-0.5	0.8	22	0.50227	1
Q91ZE6_MOUSE,	1.3	0.7	1.9	4	1.6	0.9	2.3	5	-0.3	-1.2	0.6	9	0.50449	1
HOME1_MOUSE,	-0.6	-1.1	-0.1	11	-0.8	-1.3	-0.4	13	0.2	-0.5	0.9	24	0.5057	1
FBX41_MOUSE,Q3UGY7_MOUSE,	-0.5	-0.9	-0.1	17	-0.3	-0.7	0.1	19	-0.2	-0.7	0.4	36	0.50573	1
Q7TMQ1_MOUSE,CXA1_MOUSE,Q544I7_MOUSE,	-1.2	-1.5	-0.9	27	-1.3	-1.6	-1	22	0.1	-0.3	0.5	49	0.50705	1
ADA10_MOUSE,B8JJJ0_MOUSE,	-0.8	-1.7	0.1	3	-0.4	-1.4	0.7	3	-0.4	-1.8	0.9	6	0.50735	1
NRX1A_MOUSE,	-0.7	-1	-0.3	16	-0.8	-1.3	-0.4	15	0.2	-0.4	0.7	31	0.50765	1
RLA0_MOUSE,Q5M8R8_MOUSE,	0.7	0.3	1	19	0.8	0.5	1.2	14	-0.2	-0.6	0.3	33	0.50802	1
Q3US15_MOUSE,NSDHL_MOUSE,	0	-0.6	0.6	8	-0.3	-0.9	0.4	5	0.3	-0.6	1.1	13	0.50915	1
CMTD1_MOUSE,	-0.7	-1.2	-0.3	10	-0.9	-1.3	-0.6	15	0.2	-0.4	0.7	25	0.51215	1
QCR2_MOUSE,	-1.4	-1.6	-1.2	71	-1.4	-1.6	-1.2	84	0.1	-0.2	0.3	155	0.51265	1
PYC_MOUSE,Q3T9S7_MOUSE,Q3TCQ3_MOUSE,	-0.3	-0.7	0.2	18	-0.4	-0.9	0	19	0.2	-0.4	0.8	37	0.51352	1
Q5FW97_MOUSE,ENOA_MOUSE,	1.5	1.3	1.7	47	1.6	1.3	1.8	40	-0.1	-0.4	0.2	87	0.51408	1
ASTN1_MOUSE,Q3UHD7_MOUSE,	-0.8	-1.1	-0.4	20	-0.9	-1.2	-0.6	24	0.1	-0.3	0.6	44	0.51683	1
A2APW8_MOUSE,SNAB_MOUSE,	0.6	0.4	0.9	34	0.7	0.5	1	32	-0.1	-0.5	0.3	66	0.51764	1
GABR1_MOUSE,	-0.2	-0.7	0.2	18	-0.4	-0.8	0	24	0.2	-0.4	0.8	42	0.5183	1
Q78NS1_MOUSE,	0.1	-0.2	0.5	27	0.3	-0.1	0.6	23	-0.1	-0.6	0.3	50	0.51831	1
K1C10_MOUSE,A2A513_MOUSE,	6	5.6	6.4	30	5.8	5.4	6.3	37	0.2	-0.4	0.8	67	0.51915	1
Q3UIC2_MOUSE,Q8BSI9_MOUSE,Q6GU11_MOUSE,	-0.6	-0.9	-0.2	17	-0.7	-1.2	-0.3	15	0.2	-0.4	0.7	32	0.52017	1
GNAQ_MOUSE,Q3UHH5_MOUSE,	-0.6	-0.8	-0.3	42	-0.6	-0.9	-0.4	40	0.1	-0.2	0.4	82	0.52133	1
LAMC1_MOUSE,	-1.6	-2.6	-0.6	3	-1.1	-2.1	-0.2	4	-0.4	-1.9	1	7	0.52138	1
DYN1_MOUSE,	1	0.9	1.2	109	1.1	0.9	1.3	109	-0.1	-0.3	0.2	218	0.52169	1
A2AFW7_MOUSE,Q3UA17_MOUSE,MTCH2_MOUSE,	-1.5	-1.7	-1.3	39	-1.6	-1.8	-1.3	36	0.1	-0.2	0.4	75	0.52369	1
CENPV_MOUSE,	3.1	2	3.8	6	3.4	2.6	4	6	-0.3	-1.5	0.8	12	0.52542	1
NCLN_MOUSE,	-0.3	-0.8	0.2	10	-0.5	-1.2	0.1	6	0.2	-0.5	1	16	0.52604	1
A2A4K6_MOUSE,	-1.3	-1.7	-1	19	-1.5	-1.8	-1.1	20	0.1	-0.3	0.6	39	0.52617	1
Q8K3Q4_MOUSE,	2.2	1.7	2.7	10	2	1.6	2.4	11	0.2	-0.5	0.8	21	0.52644	1
NLGN2_MOUSE,	-0.4	-0.8	-0.1	22	-0.6	-0.9	-0.2	22	0.1	-0.3	0.6	44	0.52788	1
Q9CSK4_MOUSE,A2AKH7_MOUSE,Q8JZX5_MOUSE,LRC57_MOUSE,	0	-0.7	0.7	4	0.3	-0.3	0.8	6	-0.3	-1.1	0.6	10	0.52792	1
ARF3_MOUSE,ARF1_MOUSE,Q3U344_MOUSE,	0.7	0.1	1.3	5	0.9	0.3	1.5	5	-0.3	-1.1	0.6	10	0.52811	1
Q543X6_MOUSE,MP2K4_MOUSE,	0.8	0.4	1.2	13	1	0.5	1.4	11	-0.2	-0.7	0.4	24	0.52843	1
PP2BB_MOUSE,	0.2	-0.1	0.5	27	0.1	-0.2	0.4	28	0.1	-0.3	0.5	55	0.52855	1
THY1_MOUSE,Q53YX2_MOUSE,	-1.1	-1.4	-0.9	29	-1.2	-1.5	-1	34	0.1	-0.3	0.4	63	0.53025	1
Q3U995_MOUSE,	-1.3	-1.5	-1.2	130	-1.4	-1.6	-1.3	133	0.1	-0.1	0.3	263	0.53086	1
PTPA_MOUSE,Q543N6_MOUSE,	3.1	2.6	3.7	12	3.4	2.8	3.9	8	-0.2	-1	0.5	20	0.53217	1
B1ATZ9_MOUSE,CAH4_MOUSE,	-1	-1.6	-0.4	5	-0.8	-1.4	-0.1	5	-0.3	-1.1	0.6	10	0.53393	1
LTMD1_MOUSE,	-1.4	-1.8	-0.9	9	-1.5	-1.9	-1.1	12	0.2	-0.4	0.7	21	0.53637	1
B2RSH2_MOUSE,	-1.1	-1.3	-0.9	56	-1.2	-1.4	-1	47	0.1	-0.2	0.4	103	0.53833	1
Q3TXK7_MOUSE,	-1.1	-1.4	-0.9	44	-1.2	-1.5	-1	39	0.1	-0.2	0.4	83	0.53923	1
CAC1E_MOUSE,B2RWX7_MOUSE,	-0.4	-1	0.1	10	-0.2	-0.8	0.4	6	-0.2	-1.1	0.6	16	0.5395	1
DHX9_MOUSE,	1.4	1	1.8	17	1.6	1.2	2	18	-0.2	-0.7	0.4	35	0.53993	1
TMM33_MOUSE,	0.1	-0.7	0.8	4	-0.2	-0.9	0.5	4	0.3	-0.7	1.3	8	0.54129	1
SNAG_MOUSE,	-0.2	-1.1	0.7	3	0.2	-0.7	1	5	-0.4	-1.6	0.8	8	0.54226	1
BR44_MOUSE,	-1.5	-2	-1	8	-1.7	-2	-1.3	15	0.2	-0.4	0.7	23	0.54265	1
B1AQZ0_MOUSE,	-0.5	-0.8	-0.2	30	-0.6	-1	-0.3	26	0.1	-0.3	0.6	56	0.54398	1
CDS2_MOUSE,A2AMQ4_MOUSE,	0.2	-0.2	0.6	15	0.3	-0.1	0.7	14	-0.2	-0.7	0.4	29	0.54514	1
ERGI1_MOUSE,Q69ZP5_MOUSE,Q4FK22_MOUSE,	0.1	-0.3	0.5	11	-0.1	-0.5	0.4	10	0.2	-0.4	0.7	21	0.54637	1
PPME1_MOUSE,	1.7	1.2	2.1	9	1.8	1.4	2.3	9	-0.2	-0.8	0.4	18	0.5464	1
A3KMM1_MOUSE,B1AXV0_MOUSE,	-0.1	-0.6	0.4	9	-0.3	-0.7	0.2	9	0.2	-0.5	0.8	18	0.54654	1
Q6GQT9_MOUSE,	-0.4	-0.8	0.1	18	-0.6	-1.1	-0.1	12	0.2	-0.5	0.8	30	0.54677	1
Q3UCX7_MOUSE,	-0.3	-0.6	0	19	-0.4	-0.7	-0.1	17	0.1	-0.3	0.5	36	0.54699	1
ROGDI_MOUSE,	1.3	0.7	1.9	6	1	0.4	1.8	6	0.3	-0.7	1.2	12	0.54744	1
CY1_MOUSE,	-1.4	-1.6	-1.2	50	-1.4	-1.7	-1.2	51	0.1	-0.2	0.4	101	0.54773	1
Q8R5L1_MOUSE,	-4.5	-5.3	-3.7	2	-4.8	-5.6	-4	2	0.3	-0.8	1.5	4	0.54939	1
K1967_MOUSE,	1.9	1.3	2.8	5	1.7	1	2.3	6	0.3	-0.7	1.4	11	0.54946	1
HD_MOUSE,	0.9	0.6	1.3	28	1.1	0.8	1.4	28	-0.1	-0.6	0.4	56	0.54995	1
ECHB_MOUSE,	0	-1	1	3	-0.3	-1.1	0.4	4	0.4	-0.9	1.6	7	0.55089	1
B1AU25_MOUSE,B1AU24_MOUSE,AIFM1_MOUSE,	-1.7	-2	-1.4	27	-1.8	-2.1	-1.6	27	0.1	-0.3	0.5	54	0.55093	1
Q6DIC7_MOUSE,	1.3	1	1.5	52	1.2	0.9	1.4	47	0.1	-0.2	0.4	99	0.55166	1
ADA22_MOUSE,A4FUT9_MOUSE,	-1	-1.3	-0.8	32	-1.1	-1.4	-0.9	27	0.1	-0.3	0.5	59	0.55257	1
Q3UPA1_MOUSE,GNA11_MOUSE,	-0.4	-0.7	-0.2	31	-0.5	-0.8	-0.3	32	0.1	-0.3	0.4	63	0.55417	1
NPTN_MOUSE,	-0.8	-1.1	-0.6	37	-0.9	-1.1	-0.7	41	0.1	-0.2	0.4	78	0.55468	1
TFR1_MOUSE,Q542D9_MOUSE,	-0.5	-1	-0.1	14	-0.3	-0.8	0.1	15	-0.2	-0.8	0.5	29	0.55697	1
TM111_MOUSE,	-0.4	-1.4	0.6	2	0	-1.1	1	3	-0.4	-1.8	1	5	0.5593	1
PACS1_MOUSE,	1.9	1.6	2.2	19	1.8	1.4	2.1	22	0.1	-0.3	0.6	41	0.55988	1
Q3UVW2_MOUSE,GBRG2_MOUSE,Q8C7N0_MOUSE,Q8C8H5_MOUSE,B1AT55_MOUSE,	-0.4	-1	0.2	8	-0.6	-1.2	-0.1	9	0.2	-0.6	1	17	0.56051	1
THEM4_MOUSE,	0.7	0.2	1.2	7	0.5	-0.1	1.1	5	0.2	-0.5	1	12	0.56054	1
PURB_MOUSE,	0.6	0.2	1.1	8	0.8	0.2	1.4	6	-0.2	-0.9	0.5	14	0.56084	1
PLCL2_MOUSE,	0.8	0.1	1.7	7	1.1	0.4	1.9	8	-0.3	-1.4	0.8	15	0.56201	1
RL6_MOUSE,Q3UCH0_MOUSE,	0.8	0.3	1.2	11	0.6	0.2	1	15	0.2	-0.4	0.7	26	0.56209	1
EAA1_MOUSE,Q8C7W8_MOUSE,Q543U3_MOUSE,Q8C3T7_MOUSE,	-1.1	-1.3	-0.9	101	-1.2	-1.3	-1	115	0.1	-0.2	0.3	216	0.56337	1
CC50A_MOUSE,	0.6	0.1	1	9	0.4	-0.1	0.9	11	0.2	-0.5	0.9	20	0.56413	1
FA73B_MOUSE,	-1.3	-2	-0.7	7	-1.6	-2.5	-0.7	5	0.3	-0.8	1.3	12	0.56536	1
Q3UGE3_MOUSE,Q66JR7_MOUSE,Q7TNU0_MOUSE,Q5RJV4_MOUSE,	3.1	2.6	3.5	19	2.9	2.4	3.4	13	0.2	-0.5	0.8	32	0.5661	1
BASI_MOUSE,O55108_MOUSE,O55107_MOUSE,	-1.1	-1.5	-0.7	18	-1.2	-1.5	-0.9	29	0.1	-0.3	0.6	47	0.5664	1
COPB_MOUSE,Q3T9Y4_MOUSE,	0.8	0.3	1.3	11	1	0.6	1.4	16	-0.2	-0.8	0.5	27	0.56701	1
NRCAM_MOUSE,	-1	-1.3	-0.7	23	-1.1	-1.4	-0.8	20	0.1	-0.3	0.5	43	0.56705	1
ISC2A_MOUSE,	0.7	0	1.4	6	0.5	0	1	9	0.2	-0.6	1.1	15	0.56798	1
Q14A12_MOUSE,RAC3_MOUSE,	-0.2	-0.8	0.4	6	-0.4	-0.9	0.1	6	0.2	-0.6	1	12	0.56972	1
PLXA4_MOUSE,B9EJ29_MOUSE,	-0.5	-0.9	-0.1	21	-0.7	-1.1	-0.3	18	0.2	-0.4	0.7	39	0.56974	1
ERLN2_MOUSE,	0.2	-0.1	0.5	21	0.3	-0.1	0.6	21	-0.1	-0.5	0.3	42	0.57083	1
Q8K1J7_MOUSE,ACSL3_MOUSE,	-0.3	-0.9	0.3	9	-0.6	-1.2	0.1	7	0.2	-0.7	1.1	16	0.57163	1
Q5DQJ3_MOUSE,Q3UBZ3_MOUSE,CAZA2_MOUSE,	2	1.6	2.5	12	2.2	1.8	2.6	15	-0.1	-0.7	0.4	27	0.57423	1
Q9D689_MOUSE,HIP1R_MOUSE,Q6ZQ77_MOUSE,Q3UJ14_MOUSE,Q6P1F5_MOUSE,	0.7	0.2	1.1	12	0.4	-0.1	1	11	0.2	-0.5	0.9	23	0.57551	1
TCPD_MOUSE,Q3TII0_MOUSE,Q564F4_MOUSE,	1.4	1.1	1.7	21	1.5	1.1	1.8	18	-0.1	-0.6	0.3	39	0.57747	1
ATLA1_MOUSE,	0.5	0.3	0.8	64	0.5	0.3	0.7	56	0.1	-0.2	0.3	120	0.57787	1
Q3UCC6_MOUSE,Q3U6C7_MOUSE,SUCB1_MOUSE,	-0.3	-0.6	0.1	28	-0.3	-0.6	-0.1	32	0.1	-0.3	0.5	60	0.57809	1
Q91XW9_MOUSE,	-0.8	-2.1	0.4	2	-0.4	-1.3	0.4	4	-0.4	-1.9	1.1	6	0.57891	1
SURF4_MOUSE,Q545Q2_MOUSE,	0.6	-0.3	1.5	2	0.2	-0.9	1.4	2	0.4	-1.1	1.8	4	0.57958	1
Q6DFY2_MOUSE,Q3TYL3_MOUSE,	-1.3	-1.6	-1	22	-1.4	-1.7	-1.1	19	0.1	-0.3	0.5	41	0.5802	1
Q6NXI4_MOUSE,	1.3	0.9	1.7	16	1.5	1	1.9	12	-0.2	-0.8	0.4	28	0.58122	1
B7ZMV2_MOUSE,B2RPZ8_MOUSE,	-1.8	-2.7	-0.8	3	-1.4	-2.4	-0.5	2	-0.4	-1.7	1	5	0.58181	1
UBXN6_MOUSE,	1.2	0.6	1.8	6	1.4	0.9	1.9	7	-0.2	-0.9	0.6	13	0.58225	1
Q8K1M3_MOUSE,	-0.6	-1	-0.2	17	-0.7	-1.1	-0.3	18	0.1	-0.4	0.6	35	0.58433	1
DJB14_MOUSE,	-0.2	-0.8	0.5	4	0.1	-0.7	0.8	3	-0.3	-1.2	0.7	7	0.58475	1
GNAS2_MOUSE,GNAS1_MOUSE,	-0.6	-1	-0.2	13	-0.7	-1.1	-0.3	14	0.1	-0.4	0.6	27	0.58484	1
Q5PPQ7_MOUSE,Q499X7_MOUSE,Q3TEU8_MOUSE,COR1C_MOUSE,	2.3	1.6	2.9	6	2.5	2	3	8	-0.2	-1	0.6	14	0.58693	1
Q8K314_MOUSE,	-0.8	-0.9	-0.6	125	-0.8	-1	-0.7	111	0.1	-0.1	0.3	236	0.58746	1
Q3TJT1_MOUSE,Q3TLZ3_MOUSE,Q3UDN2_MOUSE,Q3TX19_MOUSE,VPS53_MOUSE,	1	0.4	1.7	7	1.3	0.6	2	6	-0.2	-1.2	0.7	13	0.5881	1
R7BP_MOUSE,	-0.6	-1.1	-0.1	11	-0.8	-1.3	-0.2	8	0.2	-0.5	0.9	19	0.58928	1
RIMS1_MOUSE,	0.2	-1	1.3	2	0.6	-0.4	1.4	2	-0.4	-1.8	1.1	4	0.59082	1
AGAP2_MOUSE,	0.2	-0.1	0.5	28	0.1	-0.2	0.4	31	0.1	-0.3	0.5	59	0.5911	1
PIPNB_MOUSE,Q8JZZ5_MOUSE,	0.7	0	1.4	3	0.5	0	0.9	8	0.2	-0.6	1.1	11	0.59252	1
SCN1B_MOUSE,	-1.1	-1.6	-0.6	7	-1.4	-2.1	-0.6	4	0.2	-0.6	1.1	11	0.59288	1
DMXL2_MOUSE,	2	1.7	2.2	59	1.9	1.7	2.1	51	0.1	-0.2	0.4	110	0.59493	1
Q2M4I4_MOUSE,Q80XU2_MOUSE,	0.8	0.3	1.4	9	0.6	-0.3	1.4	7	0.3	-0.7	1.3	16	0.59521	1
F1712_MOUSE,	-0.4	-1.3	0.6	6	-0.1	-0.9	0.7	4	-0.3	-1.5	1	10	0.59583	1
Q14AG7_MOUSE,SYT12_MOUSE,	-0.6	-1.2	0.1	6	-0.8	-1.5	-0.1	6	0.2	-0.7	1.2	12	0.59625	1
GSLG1_MOUSE,Q53WR6_MOUSE,	0	-0.5	0.5	11	-0.2	-0.8	0.4	5	0.2	-0.6	1	16	0.59676	1
LETM1_MOUSE,	-1.3	-1.5	-1.1	70	-1.3	-1.5	-1.1	60	0.1	-0.2	0.3	130	0.59685	1
NDUAA_MOUSE,	-2.5	-2.8	-2.2	16	-2.6	-3	-2.3	15	0.1	-0.3	0.5	31	0.59899	1
FXYD7_MOUSE,	-0.8	-1.5	-0.1	3	-1.1	-2	-0.2	2	0.3	-0.9	1.5	5	0.59932	1
GBRA1_MOUSE,Q3URD4_MOUSE,Q544F7_MOUSE,	-0.7	-1.1	-0.3	19	-0.5	-0.9	-0.2	18	-0.1	-0.6	0.4	37	0.59949	1
Q68FL0_MOUSE,	-0.5	-1	-0.1	16	-0.4	-0.8	0	15	-0.2	-0.7	0.4	31	0.59959	1
Q3TGX0_MOUSE,SCAM4_MOUSE,Q3U4R0_MOUSE,	0.3	-0.7	1.3	2	0	-0.9	0.9	3	0.3	-1	1.7	5	0.59992	1
B9EJ96_MOUSE,RHG26_MOUSE,	1.3	0.6	2	6	1	0.4	1.8	9	0.2	-0.7	1.2	15	0.60014	1
ADCY9_MOUSE,	-1.2	-2	-0.5	5	-1.5	-2.3	-0.7	7	0.3	-0.8	1.3	12	0.60019	1
PX11B_MOUSE,	0.3	-0.2	0.9	8	0.1	-0.4	0.7	6	0.2	-0.6	1	14	0.60058	1
WAHS7_MOUSE,	0.8	0.1	1.6	5	1.2	0.2	2.1	5	-0.3	-1.5	0.9	10	0.6013	1
MRS2_MOUSE,	-0.8	-1.3	-0.3	10	-1	-1.4	-0.5	11	0.2	-0.5	0.8	21	0.60197	1
Q3T9D8_MOUSE,Q3UM21_MOUSE,MFTC_MOUSE,Q8K0B7_MOUSE,	-1.2	-1.8	-0.6	6	-1	-1.8	-0.1	5	-0.3	-1.3	0.8	11	0.60343	1
A2A846_MOUSE,MECR_MOUSE,	0.1	-0.8	0.9	4	-0.3	-1.6	1	2	0.4	-1.1	1.9	6	0.60383	1
A2AA49_MOUSE,GNA13_MOUSE,Q3UE40_MOUSE,	-0.4	-0.7	-0.1	23	-0.3	-0.7	0	19	-0.1	-0.5	0.3	42	0.60548	1
A8IP69_MOUSE,1433G_MOUSE,	1.4	1	1.8	14	1.3	0.9	1.7	13	0.1	-0.4	0.6	27	0.60654	1
VDAC2_MOUSE,	-1.3	-1.5	-1.1	76	-1.4	-1.6	-1.2	76	0.1	-0.2	0.3	152	0.60789	1
Q8VBV0_MOUSE,B9EJA3_MOUSE,Q8R169_MOUSE,	-0.8	-1.2	-0.5	20	-0.9	-1.3	-0.6	15	0.1	-0.4	0.6	35	0.60811	1
Q5FWJ7_MOUSE,	0.2	-0.5	1	5	-0.1	-1.2	1	2	0.3	-1	1.7	7	0.60835	1
EXOC8_MOUSE,	1.2	0.7	1.6	9	1	0.5	1.5	11	0.2	-0.5	0.8	20	0.60842	1
S39A6_MOUSE,	0.4	-0.2	1	4	0.2	-0.4	0.8	4	0.2	-0.6	1	8	0.60863	1
GBRB3_MOUSE,Q8C446_MOUSE,	-0.3	-0.7	0	16	-0.5	-0.9	-0.1	18	0.1	-0.4	0.7	34	0.6101	1
KCMA1_MOUSE,C3VLD3_MOUSE,	-1	-1.5	-0.4	6	-1.2	-1.7	-0.6	7	0.2	-0.6	0.9	13	0.61166	1
H2AY_MOUSE,	1	0.7	1.4	18	0.9	0.5	1.3	14	0.1	-0.4	0.6	32	0.61204	1
UBA1_MOUSE,B9EHN0_MOUSE,	2	1.7	2.3	33	2.1	1.9	2.4	35	-0.1	-0.4	0.3	68	0.61357	1
DC1L1_MOUSE,Q3TWG5_MOUSE,	1	0.4	1.6	8	1.2	0.6	1.8	7	-0.2	-1	0.6	15	0.61426	1
Q3V1E0_MOUSE,Q4FJM3_MOUSE,EFNB2_MOUSE,	-0.2	-0.7	0.3	9	-0.4	-1	0.2	7	0.2	-0.6	1	16	0.61495	1
LRC4B_MOUSE,	-0.3	-0.8	0.3	9	-0.4	-0.9	0	11	0.2	-0.5	0.8	20	0.61588	1
MCAR1_MOUSE,A2AKW0_MOUSE,	-0.9	-1.3	-0.6	19	-1	-1.4	-0.7	18	0.1	-0.3	0.6	37	0.61644	1
BAP29_MOUSE,Q542A1_MOUSE,	0.4	-0.3	1	5	0.6	-0.2	1.4	3	-0.2	-1.2	0.8	8	0.61815	1
VA0D1_MOUSE,	-0.2	-0.4	0.1	35	-0.2	-0.5	0	35	0.1	-0.2	0.4	70	0.61859	1
AP180_MOUSE,	1.4	1.2	1.6	53	1.5	1.3	1.7	54	-0.1	-0.4	0.2	107	0.62033	1
AP3D1_MOUSE,	1.2	0.9	1.6	27	1.3	1	1.7	24	-0.1	-0.6	0.4	51	0.62117	1
RBGP1_MOUSE,B2RRC5_MOUSE,	0.9	0.3	1.7	7	0.7	0	1.4	6	0.2	-0.7	1.3	13	0.62214	1
CALX_MOUSE,Q5SUC3_MOUSE,	-0.2	-0.4	0.1	36	-0.1	-0.4	0.2	32	-0.1	-0.4	0.3	68	0.62229	1
MPP2_MOUSE,B1AQF9_MOUSE,	0.3	-0.2	0.9	10	0.1	-0.6	0.8	7	0.2	-0.7	1.1	17	0.62258	1
HS12A_MOUSE,	0.8	0.6	1	58	0.9	0.6	1.1	51	-0.1	-0.4	0.2	109	0.62339	1
CCG8_MOUSE,	-0.3	-0.7	0.1	16	-0.4	-0.9	0	11	0.1	-0.4	0.7	27	0.62385	1
Q0VGQ1_MOUSE,DHB12_MOUSE,	-0.6	-1.1	-0.2	18	-0.5	-0.9	0	12	-0.1	-0.7	0.5	30	0.62404	1
OTUB1_MOUSE,	1	0.7	1.4	20	0.9	0.6	1.3	19	0.1	-0.3	0.5	39	0.62522	1
Q53ZT3_MOUSE,Q3TWF3_MOUSE,A4_MOUSE,Q6GR78_MOUSE,Q3TVS1_MOUSE,	-0.4	-1.3	0.6	3	-0.1	-1	0.8	3	-0.3	-1.6	1	6	0.62563	1
Q2NLC5_MOUSE,TIM44_MOUSE,Q8R3X4_MOUSE,	-0.9	-1.4	-0.3	10	-1.1	-1.7	-0.4	6	0.2	-0.6	1	16	0.62634	1
Q3UGJ3_MOUSE,DC1L2_MOUSE,	0.9	0.3	1.5	5	0.7	0.1	1.4	6	0.2	-0.6	1	11	0.62675	1
TB10B_MOUSE,	1.5	0.8	2.3	3	1.7	1.1	2.4	5	-0.2	-1.2	0.8	8	0.62676	1
TM163_MOUSE,	0.1	-0.7	0.8	4	-0.2	-0.8	0.5	5	0.2	-0.8	1.2	9	0.62776	1
Q4VA93_MOUSE,	0.8	0.5	1.2	17	0.7	0.3	1.2	14	0.1	-0.4	0.6	31	0.62989	1
FA49B_MOUSE,	1	0.8	1.3	43	1	0.7	1.2	40	0.1	-0.2	0.4	83	0.63051	1
OPA1_MOUSE,	-0.6	-0.8	-0.3	60	-0.6	-0.8	-0.4	61	0.1	-0.2	0.4	121	0.63061	1
Q8R3X6_MOUSE,GPC6_MOUSE,Q3TP69_MOUSE,Q3V1C9_MOUSE,	-0.8	-1.9	0.3	3	-0.5	-1.2	0.1	5	-0.3	-1.5	1	8	0.63188	1
PCBP3_MOUSE,	1	0.4	1.5	5	0.8	0.3	1.3	7	0.2	-0.6	0.9	12	0.63317	1
Q8BVQ9_MOUSE,PRS7_MOUSE,Q3U5V3_MOUSE,	0.9	0.4	1.5	7	1.1	0.5	1.8	5	-0.2	-1	0.6	12	0.63347	1
Q99PH4_MOUSE,	-0.3	-1	0.3	7	-0.5	-1.2	0.1	10	0.2	-0.7	1.1	17	0.63467	1
Q8K133_MOUSE,Q0PD31_MOUSE,RAB24_MOUSE,	-0.6	-1.2	-0.1	7	-0.8	-1.5	-0.1	5	0.2	-0.7	1.1	12	0.6353	1
B1AV13_MOUSE,APOOL_MOUSE,	-1	-1.4	-0.6	13	-1.2	-1.6	-0.7	11	0.1	-0.5	0.7	24	0.63617	1
Q3US73_MOUSE,CP46A_MOUSE,	0.1	-0.3	0.4	21	0	-0.4	0.3	20	0.1	-0.4	0.6	41	0.63655	1
Q790I0_MOUSE,SYVC_MOUSE,Q7TPT7_MOUSE,	0.9	0.5	1.4	17	1	0.6	1.5	16	-0.1	-0.7	0.5	33	0.63984	1
Q8C1D0_MOUSE,Q6ZWQ7_MOUSE,	0.2	-0.7	1.1	2	-0.1	-1	0.8	2	0.3	-1	1.6	4	0.6406	1
SPCS2_MOUSE,	0.2	-0.5	0.9	5	0	-0.6	0.6	4	0.2	-0.7	1.2	9	0.64248	1
PSMD1_MOUSE,	1.9	1.2	2.5	8	2.1	1.5	2.6	9	-0.2	-1	0.7	17	0.64268	1
IPO7_MOUSE,	1.2	0.9	1.7	21	1.1	0.8	1.5	24	0.1	-0.4	0.7	45	0.64422	1
Q8BPG5_MOUSE,Q9D859_MOUSE,RAC1_MOUSE,Q3TLP8_MOUSE,	-0.3	-0.6	0.1	13	-0.4	-0.8	0	12	0.1	-0.4	0.6	25	0.64618	1
EFNB1_MOUSE,Q544L9_MOUSE,	0.2	-0.4	0.8	5	0.4	-0.2	1	5	-0.2	-1	0.6	10	0.6463	1
Q8BTV1_MOUSE,Q8BMU5_MOUSE,	-0.1	-0.8	0.5	4	-0.4	-1.1	0.4	3	0.2	-0.8	1.2	7	0.648	1
GRIA3_MOUSE,A2VDF5_MOUSE,	-1	-1.2	-0.7	55	-1	-1.3	-0.8	64	0.1	-0.2	0.4	119	0.64921	1
PI51C_MOUSE,	2	1.5	2.5	9	1.9	1.4	2.3	11	0.1	-0.5	0.8	20	0.65037	1
S38A3_MOUSE,	-1.4	-2	-0.7	6	-1.5	-2.1	-1	7	0.2	-0.6	1	13	0.65074	1
C4IXU2_MOUSE,	1.1	0.5	1.9	9	0.9	0.4	1.5	9	0.2	-0.7	1.2	18	0.65135	1
SAC1_MOUSE,	0.1	-0.3	0.5	17	-0.1	-0.6	0.4	13	0.1	-0.5	0.7	30	0.65135	1
MTCH1_MOUSE,	-1	-1.3	-0.8	48	-1.1	-1.4	-0.9	45	0.1	-0.3	0.4	93	0.65268	1
ETFD_MOUSE,Q6PF96_MOUSE,	-1.1	-1.6	-0.7	14	-1.3	-1.6	-0.9	13	0.1	-0.4	0.7	27	0.65269	1
NDUB9_MOUSE,	-1.4	-1.8	-1.1	17	-1.5	-1.9	-1.2	17	0.1	-0.3	0.5	34	0.65291	1
ASPH2_MOUSE,	0.3	-0.3	0.8	9	0.4	-0.2	1.2	12	-0.2	-1.1	0.6	21	0.65293	1
KALRN_MOUSE,	0.6	0	1.2	8	0.4	-0.4	1.2	4	0.2	-0.7	1.2	12	0.65371	1
LYRIC_MOUSE,	-0.3	-0.7	0.1	16	-0.4	-1	0.1	9	0.2	-0.5	0.8	25	0.65398	1
Q9CRY0_MOUSE,Q05DA2_MOUSE,SEC62_MOUSE,	0	-0.7	0.7	3	-0.3	-1.3	0.7	2	0.3	-0.9	1.5	5	0.65585	1
C5H0E9_MOUSE,	-0.4	-0.8	0.1	10	-0.5	-0.9	-0.1	10	0.1	-0.4	0.7	20	0.65821	1
LRRT4_MOUSE,	-1	-1.7	-0.3	6	-0.8	-1.6	0.1	3	-0.2	-1.3	0.8	9	0.6588	1
RAB2A_MOUSE,Q0PD65_MOUSE,	-0.4	-0.7	-0.1	26	-0.5	-0.8	-0.2	28	0.1	-0.3	0.5	54	0.65884	1
RAN_MOUSE,Q3ULW0_MOUSE,	2	1.6	2.4	9	1.8	1.3	2.4	7	0.1	-0.5	0.8	16	0.66131	1
Q811L7_MOUSE,Q8C2Q7_MOUSE,HNRH1_MOUSE,	0.5	-0.1	1.1	6	0.3	-0.5	1.1	3	0.2	-0.8	1.2	9	0.66412	1
MTMR5_MOUSE,B2RXX4_MOUSE,B7ZWK2_MOUSE,	1.2	0.9	1.6	28	1.1	0.8	1.5	26	0.1	-0.4	0.5	54	0.66437	1
Q8CE18_MOUSE,Q8BG11_MOUSE,Q8VDK4_MOUSE,	0.3	-0.2	0.9	6	0.2	-0.4	0.7	9	0.2	-0.6	0.9	15	0.66727	1
Q4FJP3_MOUSE,Q3UCX0_MOUSE,Q3TMF4_MOUSE,Q9D091_MOUSE,RASN_MOUSE,	-0.3	-0.8	0.2	8	-0.4	-0.8	0	10	0.1	-0.5	0.8	18	0.66835	1
Q3U2F9_MOUSE,GBB4_MOUSE,Q3THF3_MOUSE,	-0.6	-1	-0.3	17	-0.7	-1.1	-0.4	15	0.1	-0.4	0.6	32	0.6701	1
Q3UUL5_MOUSE,GRID1_MOUSE,	-0.3	-1.1	0.6	3	-0.5	-1.3	0.3	5	0.2	-0.9	1.3	8	0.67191	1
Q3V307_MOUSE,Q3V3K6_MOUSE,PIGS_MOUSE,	-0.3	-1.1	0.5	6	-0.1	-0.7	0.5	6	-0.2	-1.2	0.8	12	0.67196	1
LNP_MOUSE,	0.3	-0.2	0.8	11	0.2	-0.3	0.6	11	0.1	-0.5	0.8	22	0.672	1
S27A1_MOUSE,Q544D7_MOUSE,Q3TN26_MOUSE,Q3TP13_MOUSE,	-0.4	-1.5	0.6	3	-0.2	-0.9	0.5	5	-0.3	-1.5	1	8	0.67329	1
DNM1L_MOUSE,	1	0.8	1.2	74	1.1	0.9	1.3	67	-0.1	-0.3	0.2	141	0.67381	1
Q5SW83_MOUSE,ARP2_MOUSE,	2.1	1.6	2.6	9	1.9	1.5	2.4	10	0.1	-0.5	0.8	19	0.67465	1
Q91VJ9_MOUSE,	0	-0.6	0.7	5	-0.1	-0.7	0.5	6	0.2	-0.7	1	11	0.67661	1
LRFN6_MOUSE,	-0.5	-1.4	0.4	3	-0.8	-1.9	0.3	3	0.3	-1.1	1.7	6	0.67817	1
KBP_MOUSE,	1.2	0.3	2	2	1.4	0.5	2.5	3	-0.3	-1.7	1	5	0.67854	1
CNTP2_MOUSE,	-0.5	-1	0	9	-0.7	-1.2	-0.1	10	0.2	-0.6	0.9	19	0.67949	1
FA81A_MOUSE,	-0.3	-0.7	0	21	-0.2	-0.6	0.1	24	-0.1	-0.6	0.4	45	0.68041	1
B1B1C8_MOUSE,KPCE_MOUSE,	0.8	0.4	1.2	14	0.7	0.3	1.1	13	0.1	-0.5	0.7	27	0.68086	1
Q4FE56_MOUSE,A2AD18_MOUSE,	1.5	1.2	1.8	43	1.5	1.2	1.7	39	0.1	-0.3	0.4	82	0.6817	1
MBOA7_MOUSE,	0.4	-0.5	1.2	3	0.6	-0.1	1.3	4	-0.2	-1.3	0.9	7	0.68236	1
B2KGP3_MOUSE,PPM1E_MOUSE,	1.1	0.5	1.7	6	1.3	0.6	2.1	5	-0.2	-1.2	0.7	11	0.68405	1
SFXN1_MOUSE,	-1.1	-1.4	-0.8	28	-1.2	-1.4	-0.9	36	0.1	-0.3	0.4	64	0.68433	1
GCYB1_MOUSE,	1	0.7	1.4	18	1.1	0.7	1.5	18	-0.1	-0.6	0.4	36	0.68465	1
TMED4_MOUSE,	0.1	-0.7	0.9	3	-0.1	-0.9	0.7	4	0.2	-0.9	1.4	7	0.68553	1
Q1HL33_MOUSE,ADA2A_MOUSE,Q3URE6_MOUSE,	-0.9	-1.5	-0.3	5	-0.7	-1.6	0.3	2	-0.2	-1.3	0.9	7	0.68624	1
Q8K2R0_MOUSE,	1	0.4	1.9	7	0.9	0.3	1.5	8	0.2	-0.7	1.2	15	0.688	1
GABT_MOUSE,	-3	-3.4	-2.7	11	-3.2	-3.6	-2.7	8	0.1	-0.4	0.6	19	0.68804	1
SNP47_MOUSE,	0.5	0.2	0.9	19	0.5	0.1	0.8	14	0.1	-0.4	0.6	33	0.68893	1
SFXN5_MOUSE,Q8BRQ9_MOUSE,	-1.6	-1.9	-1.4	37	-1.7	-1.9	-1.5	40	0.1	-0.3	0.4	77	0.68895	1
SNP25_MOUSE,	-1.2	-1.5	-1	55	-1.3	-1.5	-1.1	59	0.1	-0.2	0.3	114	0.69035	1
Q91XH6_MOUSE,VTI1B_MOUSE,Q9Z2P7_MOUSE,	0	-0.4	0.5	9	0.2	-0.4	0.7	7	-0.1	-0.8	0.6	16	0.69229	1
Q8BGR3_MOUSE,KCC4_MOUSE,	0.3	-0.5	1.1	3	0.6	-0.5	1.6	2	-0.3	-1.6	1.1	5	0.69248	1
S61A2_MOUSE,A2ATT8_MOUSE,	-0.1	-0.8	0.7	6	-0.3	-1.2	0.6	2	0.2	-0.9	1.4	8	0.69597	1
TRIO_MOUSE,	0.6	0.1	1	13	0.7	0.2	1.2	13	-0.1	-0.8	0.5	26	0.69624	1
RAB18_MOUSE,Q0PD38_MOUSE,	0	-0.5	0.4	10	-0.1	-0.5	0.2	14	0.1	-0.5	0.7	24	0.69754	1
CF174_MOUSE,	0.5	0.1	0.9	13	0.4	0	0.8	18	0.1	-0.5	0.6	31	0.69755	1
MARH5_MOUSE,A2RTC8_MOUSE,	-1.1	-1.6	-0.7	10	-1.3	-1.6	-0.9	13	0.1	-0.5	0.7	23	0.69832	1
NU4M_MOUSE,Q7JCY6_MOUSE,Q7JCZ9_MOUSE,Q5GA75_MUSMM,B9V1K8_MOUSE,A3R4A0_MUSMM,Q9ME04_MOUSE,	-1.5	-1.7	-1.3	53	-1.6	-1.8	-1.4	65	0.1	-0.2	0.3	118	0.69864	1
VAPB_MOUSE,Q8BH80_MOUSE,	0	-0.4	0.4	12	-0.1	-0.5	0.3	13	0.1	-0.4	0.6	25	0.6987	1
ITPR1_MOUSE,	0.3	0	0.6	44	0.3	0	0.5	41	0.1	-0.3	0.4	85	0.6988	1
A2AS90_MOUSE,DJC16_MOUSE,	-0.5	-1.4	0.3	5	-0.3	-1.3	0.8	3	-0.3	-1.6	1.1	8	0.69935	1
Q6A0C7_MOUSE,RAB21_MOUSE,Q0PD35_MOUSE,	-0.5	-0.9	0	9	-0.6	-1	-0.2	13	0.1	-0.5	0.7	22	0.69959	1
A2A547_MOUSE,Q5I0T8_MOUSE,RL19_MOUSE,	0.3	-0.3	0.8	6	0.1	-0.5	0.7	5	0.2	-0.6	1	11	0.69968	1
Q4FJL0_MOUSE,RAB10_MOUSE,	-0.4	-0.7	-0.1	23	-0.5	-0.9	-0.2	18	0.1	-0.4	0.5	41	0.70009	1
B2RQY8_MOUSE,Q7TNG0_MOUSE,SPG7_MOUSE,	-1.2	-1.5	-0.8	19	-1.3	-1.8	-0.7	12	0.1	-0.5	0.7	31	0.70079	1
A2AKT7_MOUSE,XPO1_MOUSE,	1	0.6	1.3	22	1	0.7	1.3	27	-0.1	-0.5	0.3	49	0.70126	1
Q3U2P3_MOUSE,CAN5_MOUSE,Q3TPL4_MOUSE,	-0.8	-1.3	-0.3	11	-0.9	-1.5	-0.3	11	0.1	-0.6	0.9	22	0.70127	1
TWF2_MOUSE,	2	1.4	2.5	9	1.8	1.2	2.4	6	0.1	-0.7	0.9	15	0.70188	1
KPCB_MOUSE,	0.9	0.6	1.2	29	0.8	0.5	1.1	21	0.1	-0.3	0.5	50	0.70327	1
Q91YS9_MOUSE,EPHB3_MOUSE,	-1.1	-1.9	-0.3	5	-1.3	-2.1	-0.5	7	0.2	-0.9	1.3	12	0.70419	1
Q0PD66_MOUSE,RAB1B_MOUSE,Q3V3C2_MOUSE,	-0.6	-0.9	-0.3	30	-0.7	-0.9	-0.4	33	0.1	-0.3	0.4	63	0.70443	1
ZNT3_MOUSE,Q6NZC3_MOUSE,Q3TMQ7_MOUSE,	0.4	0.1	0.8	15	0.3	-0.1	0.7	12	0.1	-0.4	0.6	27	0.70562	1
Q8C1E4_MOUSE,SC23A_MOUSE,	2	1.5	2.5	6	2.2	1.6	2.8	6	-0.1	-0.9	0.6	12	0.70568	1
Q3TMC5_MOUSE,SYDC_MOUSE,Q3U987_MOUSE,Q3TF87_MOUSE,	2.2	1.8	2.7	16	2.3	1.8	2.8	8	-0.1	-0.7	0.5	24	0.7063	1
Q3TKR5_MOUSE,Q58EU6_MOUSE,Q3U850_MOUSE,RL5_MOUSE,	1.4	0.8	2	6	1.2	0.3	2.1	3	0.2	-0.9	1.2	9	0.70723	1
Q54AJ5_MOUSE,CD166_MOUSE,	-0.8	-1	-0.5	35	-0.8	-1.1	-0.6	34	0.1	-0.3	0.4	69	0.70754	1
Q3UKS0_MOUSE,Q3UC67_MOUSE,ACSL5_MOUSE,	-0.4	-1.2	0.3	4	-0.6	-1.4	0.1	5	0.2	-0.9	1.3	9	0.708	1
Q5EBQ6_MOUSE,RL9_MOUSE,	0.9	0.4	1.4	7	0.8	0.3	1.2	10	0.1	-0.6	0.8	17	0.71063	1
PRDX2_MOUSE,	0.2	-0.7	1	4	-0.1	-0.9	0.7	4	0.2	-0.9	1.4	8	0.71091	1
D2KHZ9_MOUSE,G3P_MOUSE,	-0.4	-0.8	-0.1	22	-0.4	-0.7	0	17	-0.1	-0.6	0.4	39	0.7111	1
Q9CQY3_MOUSE,Q9D037_MOUSE,ATP5L_MOUSE,	-1.2	-2.3	0	2	-1.4	-2.3	-0.6	2	0.3	-1.1	1.6	4	0.7112	1
Q8K596_MOUSE,Q68EG0_MOUSE,	-0.6	-0.8	-0.3	78	-0.6	-0.8	-0.4	73	0.1	-0.2	0.3	151	0.71123	1
TCPG_MOUSE,Q3U4U6_MOUSE,	1.5	0.9	2.2	9	1.4	0.7	2	6	0.2	-0.8	1.1	15	0.71258	1
Q2KHP0_MOUSE,Q3TZ64_MOUSE,KCNA1_MOUSE,Q8CA58_MOUSE,	-1.2	-1.6	-0.8	14	-1.3	-1.8	-0.8	8	0.1	-0.5	0.7	22	0.71279	1
Q3UJH5_MOUSE,Q3U861_MOUSE,VATD_MOUSE,	1.5	1.2	1.8	21	1.4	1.1	1.8	16	0.1	-0.3	0.5	37	0.71362	1
ATPK_MOUSE,	-1.2	-2.4	-0.1	2	-1.5	-2.4	-0.6	3	0.3	-1.2	1.7	5	0.71492	1
ZNT9_MOUSE,	-1.1	-1.8	-0.4	3	-0.9	-1.5	-0.4	6	-0.2	-1	0.7	9	0.71515	1
FA73A_MOUSE,B2RRB9_MOUSE,	-0.9	-1.6	-0.2	4	-1.1	-2	-0.2	4	0.2	-0.9	1.3	8	0.71531	1
TBC24_MOUSE,	0.9	0.6	1.3	14	0.9	0.4	1.3	9	0.1	-0.5	0.7	23	0.71573	1
RAB8A_MOUSE,Q3UHW5_MOUSE,Q0PD50_MOUSE,	0.1	-0.4	0.7	6	0	-0.4	0.5	10	0.1	-0.5	0.8	16	0.7163	1
Q8BXT5_MOUSE,Q3US35_MOUSE,Q3UTP8_MOUSE,SATT_MOUSE,	-0.6	-1	-0.2	15	-0.7	-1.1	-0.3	14	0.1	-0.5	0.7	29	0.71631	1
Q543Y7_MOUSE,PACN1_MOUSE,	0.6	-0.1	1.3	4	0.4	-0.1	1	8	0.2	-0.7	1.1	12	0.71662	1
B1ASZ0_MOUSE,GLPK_MOUSE,Q3TEN9_MOUSE,	-1.4	-1.7	-1.1	32	-1.5	-1.7	-1.2	33	0.1	-0.3	0.4	65	0.71679	1
Q3UEQ1_MOUSE,	1.3	0.8	1.8	14	1.2	0.7	1.6	11	0.1	-0.5	0.7	25	0.7168	1
MDHC_MOUSE,	-0.2	-0.6	0.2	16	-0.1	-0.6	0.3	12	-0.1	-0.7	0.5	28	0.71743	1
B9EJ86_MOUSE,	0.1	-0.6	0.7	6	-0.1	-0.8	0.6	8	0.2	-0.8	1.1	14	0.71933	1
Q3UBR8_MOUSE,Q545H3_MOUSE,TI17B_MOUSE,	-1.5	-2.3	-0.7	4	-1.4	-2.1	-0.7	3	-0.2	-1.2	0.9	7	0.7194	1
RL7_MOUSE,Q5M9N8_MOUSE,Q3UBI6_MOUSE,	0.7	0.4	1.1	17	0.7	0.3	1	21	0.1	-0.4	0.5	38	0.72095	1
Q6ZQK4_MOUSE,	1.1	0.7	1.5	16	1.2	0.9	1.6	16	-0.1	-0.6	0.4	32	0.72109	1
CBAA1_MOUSE,	-0.9	-2.1	0.2	2	-1.2	-1.8	-0.5	4	0.2	-1.1	1.6	6	0.72156	1
CC132_MOUSE,	1.1	0.6	1.6	7	1	0.6	1.4	16	0.1	-0.6	0.8	23	0.72159	1
SHSA4_MOUSE,	-0.4	-1.2	0.4	2	-0.6	-1.4	0.2	2	0.2	-0.9	1.3	4	0.72286	1
LRC59_MOUSE,Q3TF84_MOUSE,	-0.6	-0.9	-0.2	15	-0.7	-1.1	-0.2	13	0.1	-0.4	0.6	28	0.72307	1
PITM2_MOUSE,	0.7	0.1	1.4	12	0.5	-0.3	1.4	6	0.2	-0.9	1.2	18	0.72325	1
COPG_MOUSE,Q8BP96_MOUSE,	0.4	-0.1	1	8	0.6	0	1.2	6	-0.2	-1	0.7	14	0.72353	1
CCG3_MOUSE,A6H6R5_MOUSE,	-1.2	-1.6	-0.7	9	-1.1	-1.6	-0.5	6	-0.1	-0.8	0.6	15	0.72492	1
Q5F258_MOUSE,GIT1_MOUSE,	1	0.6	1.4	19	1.1	0.7	1.5	16	-0.1	-0.6	0.4	35	0.72554	1
B2RSR7_MOUSE,GPD1L_MOUSE,	0.8	0.4	1.3	16	0.8	0.3	1.2	10	0.1	-0.5	0.7	26	0.72554	1
SYIM_MOUSE,	0.2	-0.4	0.8	9	0.1	-0.3	0.5	15	0.1	-0.6	0.8	24	0.72651	1
KAPCA_MOUSE,	1.6	1.3	1.8	30	1.5	1.2	1.8	28	0.1	-0.3	0.4	58	0.72705	1
SUGT1_MOUSE,	0.9	0.1	1.6	3	0.7	0	1.4	5	0.2	-0.8	1.2	8	0.72771	1
TMX2_MOUSE,	-0.1	-0.6	0.3	9	-0.2	-0.6	0.2	8	0.1	-0.5	0.7	17	0.72843	1
ASNA_MOUSE,	1.1	0.5	1.7	5	1	0.3	1.6	7	0.1	-0.7	1	12	0.72906	1
CAD11_MOUSE,Q8C7Q6_MOUSE,	-1	-2	0.1	3	-0.8	-1.6	0.1	4	-0.2	-1.6	1.1	7	0.73029	1
ACTY_MOUSE,	1.1	0.8	1.5	14	1	0.7	1.4	19	0.1	-0.4	0.5	33	0.73116	1
PLXA2_MOUSE,	-0.6	-1.2	-0.1	10	-0.5	-1	0.1	7	-0.1	-0.9	0.6	17	0.73149	1
B9EJS3_MOUSE,TBAL3_MOUSE,	0.9	0.6	1.2	27	0.9	0.7	1.2	32	-0.1	-0.5	0.3	59	0.73448	1
Q3UKQ5_MOUSE,MPRD_MOUSE,Q3UF03_MOUSE,	0.4	0	0.8	13	0.5	0.1	0.8	14	-0.1	-0.6	0.4	27	0.73483	1
APMAP_MOUSE,	-0.2	-0.6	0.3	11	-0.1	-0.5	0.3	13	-0.1	-0.7	0.5	24	0.73668	1
CDC42_MOUSE,	-0.5	-0.9	-0.1	9	-0.6	-1	-0.2	10	0.1	-0.5	0.6	19	0.73685	1
Q5SRA3_MOUSE,Q5SRA4_MOUSE,ADA23_MOUSE,Q5SRA0_MOUSE,Q5SVE1_MOUSE,	-1.1	-1.5	-0.7	15	-1.2	-1.7	-0.6	8	0.1	-0.5	0.7	23	0.73718	1
RAB8B_MOUSE,Q0PD49_MOUSE,	0.2	-0.3	0.7	7	0.1	-0.3	0.6	10	0.1	-0.5	0.7	17	0.73792	1
B1AQE7_MOUSE,NF1_MOUSE,B1AQE8_MOUSE,	0.9	0.6	1.3	19	1	0.6	1.4	21	-0.1	-0.6	0.4	40	0.73876	1
SAHH2_MOUSE,	1.2	0.7	1.7	12	1.4	0.6	2.2	10	-0.1	-1.1	0.7	22	0.73876	1
EI2BB_MOUSE,Q8BK57_MOUSE,	1.5	0.6	2.4	2	1.3	0.5	2.1	3	0.2	-1	1.4	5	0.73878	1
SE6L2_MOUSE,	0.3	-0.3	0.8	7	0.2	-0.4	0.7	8	0.1	-0.6	0.8	15	0.73884	1
B2RRX2_MOUSE,PP2BA_MOUSE,	0.1	-0.2	0.3	35	0	-0.3	0.3	36	0.1	-0.3	0.5	71	0.74	1
Q0VGU0_MOUSE,SAR1B_MOUSE,	0.1	-0.5	0.7	4	0.2	-0.3	0.8	5	-0.1	-1	0.7	9	0.74012	1
Q5EBQ0_MOUSE,	-1.2	-1.5	-1	59	-1.3	-1.5	-1.1	59	0.1	-0.2	0.3	118	0.74039	1
B7ZN20_MOUSE,ELMD1_MOUSE,B7ZN22_MOUSE,Q0P556_MOUSE,	-0.9	-1.7	-0.2	5	-0.8	-1.4	-0.1	8	-0.2	-1.1	0.8	13	0.74074	1
B1ASM1_MOUSE,LPP3_MOUSE,	-1	-1.4	-0.7	19	-1.1	-1.4	-0.8	24	0.1	-0.4	0.5	43	0.74101	1
DYN3_MOUSE,	1.2	1	1.4	48	1.2	1	1.5	49	-0.1	-0.4	0.3	97	0.74157	1
COX15_MOUSE,	-1.1	-2.4	0	3	-1.4	-2	-0.7	5	0.2	-1.3	1.5	8	0.74159	1
A3QM89_MOUSE,Q7M6W1_MOUSE,	0.5	0.2	0.8	27	0.4	0.1	0.7	26	0.1	-0.3	0.4	53	0.74172	1
STX1B_MOUSE,	-0.8	-1	-0.6	64	-0.9	-1.1	-0.7	64	0.1	-0.2	0.3	128	0.7429	1
RS7_MOUSE,Q4FZE6_MOUSE,	0.5	0	1.1	7	0.4	0	0.9	11	0.1	-0.6	0.8	18	0.74406	1
Q9CQM8_MOUSE,RL21_MOUSE,Q4VA28_MOUSE,	0.1	-0.4	0.8	6	0.3	-0.3	0.9	6	-0.1	-0.9	0.7	12	0.74542	1
GRIK2_MOUSE,A3KMF0_MOUSE,A3KMF1_MOUSE,	-0.8	-1.5	-0.1	6	-0.7	-1.4	0.1	6	-0.2	-1.2	0.8	12	0.7456	1
DHRS7_MOUSE,	-0.2	-1	0.8	5	0	-0.8	0.8	5	-0.2	-1.3	1.1	10	0.74576	1
A2ALM8_MOUSE,BAP31_MOUSE,Q3U9U5_MOUSE,	-0.2	-0.7	0.4	5	-0.1	-0.7	0.6	4	-0.1	-0.9	0.7	9	0.74578	1
PITM1_MOUSE,	1.5	0.9	2	11	1.3	0.8	1.8	10	0.1	-0.6	0.9	21	0.7462	1
K1688_MOUSE,	-0.5	-1.3	0.2	4	-0.4	-1.1	0.3	4	-0.2	-1.1	0.8	8	0.74704	1
A2AEG3_MOUSE,	-1.2	-1.5	-0.9	22	-1.3	-1.6	-1	32	0.1	-0.3	0.4	54	0.74752	1
ATCAY_MOUSE,	0.9	0.5	1.3	15	1	0.5	1.5	11	-0.1	-0.7	0.5	26	0.74805	1
A2AMV7_MOUSE,Q923G3_MOUSE,Q3TRH8_MOUSE,A2AMW0_MOUSE,	2.3	1.8	2.7	13	2.2	1.7	2.7	10	0.1	-0.6	0.7	23	0.74888	1
A2CG35_MOUSE,RAB12_MOUSE,	-0.2	-0.8	0.4	4	-0.3	-1	0.3	4	0.1	-0.8	1.1	8	0.74893	1
RGRF1_MOUSE,B2RS27_MOUSE,	1.2	0.5	2	6	1	0.4	1.7	8	0.2	-0.8	1.1	14	0.74997	1
Q5SVP3_MOUSE,PSME2_MOUSE,	1.8	1.2	2.3	8	1.9	1.2	2.6	6	-0.1	-1	0.7	14	0.75033	1
A2BI30_MOUSE,	-0.5	-1	0.1	11	-0.6	-1.1	0	11	0.1	-0.6	0.9	22	0.75052	1
Q05CJ5_MOUSE,Q3TC38_MOUSE,Q3TDJ2_MOUSE,	-0.6	-0.8	-0.3	66	-0.6	-0.8	-0.4	62	0.1	-0.2	0.4	128	0.75083	1
GSK3A_MOUSE,	0.9	0.2	1.6	4	0.7	0	1.4	5	0.2	-0.8	1.1	9	0.75191	1
DLGP3_MOUSE,Q3TY61_MOUSE,B1AS06_MOUSE,	-0.9	-1.5	-0.4	7	-1	-1.5	-0.5	7	0.1	-0.6	0.8	14	0.75466	1
2AAA_MOUSE,	1.4	1.2	1.6	58	1.3	1.1	1.5	59	0.1	-0.2	0.3	117	0.75532	1
Q9MQW4_MOUSE,A3R458_MUSMC,Q7JCX7_MOUSE,A3R3W7_MOUSE,B9V188_MOUSE,COX3_MOUSE,Q5GA78_MUSMM,A3E4B3_MOUSE,Q7JCA9_MOUSE,	-1	-1.7	-0.4	4	-0.9	-1.6	-0.3	3	-0.1	-1	0.7	7	0.75595	1
Q9DC13_MOUSE,Q8VH34_MOUSE,Q922T9_MOUSE,LAMP1_MOUSE,Q3TX84_MOUSE,Q3TA96_MOUSE,	-0.1	-1	0.8	3	-0.2	-1.5	0.7	4	0.2	-1.1	1.7	7	0.75691	1
TOM22_MOUSE,	-1.4	-1.8	-1.1	11	-1.4	-1.7	-1	13	-0.1	-0.6	0.4	24	0.75733	1
Q3TED2_MOUSE,Q80Y09_MOUSE,PDC6I_MOUSE,B8JJL8_MOUSE,	1.3	0.8	1.8	12	1.4	0.9	1.8	10	-0.1	-0.7	0.5	22	0.75737	1
IPO9_MOUSE,	0.4	-0.2	1.1	7	0.6	0	1.1	9	-0.1	-1	0.7	16	0.7587	1
Q3UY19_MOUSE,Q2KHL7_MOUSE,	-0.8	-1.2	-0.4	19	-0.9	-1.3	-0.5	18	0.1	-0.4	0.6	37	0.76224	1
KTN1_MOUSE,	-0.1	-0.6	0.3	10	-0.3	-0.9	0.4	7	0.1	-0.7	0.9	17	0.76266	1
Q3UCT9_MOUSE,Q9D1Q3_MOUSE,Q3TVJ0_MOUSE,ITM2B_MOUSE,	-0.2	-0.7	0.3	7	-0.1	-0.6	0.4	9	-0.1	-0.8	0.6	16	0.76378	1
BAT5_MOUSE,	-0.4	-0.9	0.1	12	-0.3	-0.8	0.2	14	-0.1	-0.8	0.6	26	0.76405	1
TNPO2_MOUSE,	1.1	0.7	1.5	15	1	0.6	1.4	14	0.1	-0.5	0.6	29	0.7648	1
GRM2_MOUSE,	-0.4	-0.8	0	17	-0.5	-0.9	0	14	0.1	-0.5	0.7	31	0.76486	1
KIFA3_MOUSE,	1.7	0.6	2.4	3	1.4	0.5	2.2	4	0.2	-1.2	1.5	7	0.76524	1
ADCY2_MOUSE,Q3V1Q3_MOUSE,	-0.5	-1.4	0.3	5	-0.7	-1.5	0.1	5	0.2	-1	1.4	10	0.76559	1
Q4FJR4_MOUSE,PDK3_MOUSE,	0	-1.2	1.2	2	-0.2	-0.8	0.5	5	0.2	-1.2	1.6	7	0.76768	1
Q6PD28_MOUSE,Q3V3S8_MOUSE,	1	0.5	1.5	8	1.1	0.4	2.1	6	-0.1	-1.2	0.7	14	0.7679	1
TMX1_MOUSE,	0.1	-0.7	1	3	0	-0.8	0.7	4	0.2	-1	1.3	7	0.76866	1
CDIPT_MOUSE,	0.1	-0.3	0.5	11	0	-0.5	0.5	8	0.1	-0.5	0.7	19	0.76906	1
MMSA_MOUSE,	0.4	-0.1	0.9	10	0.5	-0.1	1.1	7	-0.1	-0.9	0.7	17	0.76981	1
P5CR2_MOUSE,Q3TMZ1_MOUSE,	-0.2	-1.6	1.1	2	-0.4	-1.1	0.2	5	0.2	-1.2	1.7	7	0.76993	1
NLGN1_MOUSE,	-0.7	-1.1	-0.3	13	-0.8	-1.2	-0.3	13	0.1	-0.5	0.7	26	0.77081	1
PHAR1_MOUSE,	0	-0.5	0.5	7	-0.1	-0.9	0.6	4	0.1	-0.8	1	11	0.77097	1
T126A_MOUSE,	-1.4	-2.1	-0.8	4	-1.5	-2.1	-1	5	0.1	-0.7	0.9	9	0.7715	1
STML2_MOUSE,A2AG40_MOUSE,	-1.6	-2.1	-1.1	7	-1.7	-2.1	-1.2	9	0.1	-0.6	0.7	16	0.77278	1
Q7JCZ1_MOUSE,COX2_MOUSE,Q5GA81_MUSMM,A3R481_MOUSE,Q7JD03_MOUSE,A3R455_MUSMC,	-1.1	-1.4	-0.9	38	-1.2	-1.4	-1	39	0.1	-0.2	0.4	77	0.77311	1
TIM22_MOUSE,	-1.3	-2	-0.5	3	-1.4	-2	-0.8	4	0.1	-0.8	1	7	0.77362	1
OSCP1_MOUSE,A0ZV96_MOUSE,A2A8Y5_MOUSE,	1.6	0.4	2.7	2	1.3	0.5	2.2	3	0.2	-1.2	1.6	5	0.77387	1
LHPL4_MOUSE,	-0.3	-1.4	0.7	2	-0.5	-1.2	0.2	4	0.2	-1.1	1.4	6	0.77398	1
Q6NZC5_MOUSE,Q8VC46_MOUSE,Q78XY9_MOUSE,Q922B0_MOUSE,UBIQ_MOUSE,Q8R0Z9_MOUSE,Q8C2K3_MOUSE,Q66JP1_MOUSE,Q922Z8_MOUSE,Q5SX22_MOUSE,Q3TH47_MOUSE,Q642L7_MOUSE,A5JUZ1_MOUSE,	-0.2	-0.5	0.1	29	-0.1	-0.4	0.1	37	-0.1	-0.5	0.3	66	0.77424	1
RMD3_MOUSE,	-0.9	-1.3	-0.6	16	-1	-1.4	-0.6	13	0.1	-0.4	0.6	29	0.77437	1
DRS7B_MOUSE,	-1.2	-1.7	-0.6	9	-1.3	-1.8	-0.7	9	0.1	-0.6	0.8	18	0.77484	1
Q8R5C0_MOUSE,	-1.3	-1.6	-1	15	-1.4	-1.7	-1.1	20	0.1	-0.4	0.5	35	0.77489	1
Q3UNQ1_MOUSE,	-1.3	-1.6	-1	22	-1.4	-1.6	-1.1	25	0.1	-0.3	0.5	47	0.77504	1
Q9Z1R9_MOUSE,	6	5.1	6.8	6	6.1	5.7	6.6	13	-0.1	-1.1	0.7	19	0.77541	1
Q3UY05_MOUSE,Q8VC72_MOUSE,Q5M9P5_MOUSE,NDUS8_MOUSE,	-1.7	-2.1	-1.3	10	-1.6	-2	-1.2	10	-0.1	-0.6	0.5	20	0.77547	1
Q6P6I8_MOUSE,	-0.8	-1	-0.5	47	-0.8	-1.1	-0.6	49	0.1	-0.3	0.4	96	0.77606	1
Q69ZY2_MOUSE,ENDD1_MOUSE,	0.1	-1.2	1.2	4	-0.1	-0.9	0.7	4	0.2	-1.4	1.5	8	0.77647	1
EFR3A_MOUSE,	-0.6	-1.1	0	6	-0.5	-1	0.1	7	-0.1	-0.9	0.7	13	0.77681	1
RGRF2_MOUSE,	0.9	0.4	1.4	13	1	0.5	1.5	13	-0.1	-0.7	0.6	26	0.77684	1
Q3UL78_MOUSE,	-0.6	-1	-0.2	8	-0.7	-1.1	-0.3	8	0.1	-0.5	0.7	16	0.77711	1
Q3TY78_MOUSE,GNAL_MOUSE,	-0.2	-1.1	0.6	4	-0.1	-0.8	0.6	4	-0.2	-1.2	0.9	8	0.77742	1
STX4_MOUSE,	-1.9	-2.9	-0.9	2	-1.8	-2.4	-1.1	4	-0.2	-1.3	1	6	0.77796	1
ATLA3_MOUSE,	0.1	-0.5	0.7	7	0.2	-0.6	1	3	-0.1	-1.1	0.9	10	0.77801	1
EIF3L_MOUSE,	1.4	1	1.8	13	1.5	0.9	2.8	8	-0.1	-1.6	0.7	21	0.77829	1
SEPT7_MOUSE,Q8C2A3_MOUSE,	1.9	1.7	2.1	42	1.8	1.6	2.1	43	0.1	-0.3	0.4	85	0.77907	1
Q91V78_MOUSE,Q3UWG5_MOUSE,	-1	-1.4	-0.7	26	-1.1	-1.4	-0.8	28	0.1	-0.3	0.5	54	0.7791	1
KCC2B_MOUSE,	-1	-1.2	-0.9	149	-1	-1.1	-0.8	162	-0.1	-0.3	0.1	311	0.77989	1
Q8BL63_MOUSE,GPI8_MOUSE,	0.2	-0.7	1	4	0	-0.6	0.7	8	0.1	-0.9	1.2	12	0.78191	1
NSMA2_MOUSE,	-0.6	-1.4	0.1	3	-0.8	-1.3	-0.2	7	0.1	-0.8	1	10	0.78235	1
Q6A0A4_MOUSE,Q3UZK0_MOUSE,Q8R1E1_MOUSE,LGAT1_MOUSE,	-0.1	-0.7	0.5	6	-0.2	-0.7	0.4	9	0.1	-0.7	0.9	15	0.78242	1
PTH2_MOUSE,Q5SXR0_MOUSE,	-1.3	-2.1	-0.6	5	-1.2	-1.8	-0.6	6	-0.1	-1	0.8	11	0.78435	1
Q5EBG5_MOUSE,Q6P1A9_MOUSE,Q80UT7_MOUSE,RL7A_MOUSE,Q58ET1_MOUSE,	0.5	0	1.1	9	0.4	-0.4	1.2	3	0.1	-0.8	1.1	12	0.78459	1
Q3UQL2_MOUSE,CSN3_MOUSE,	1.5	1.1	1.9	14	1.5	1	1.9	14	0.1	-0.5	0.7	28	0.7846	1
TERA_MOUSE,	1	0.4	1.6	9	0.9	0.3	1.5	8	0.1	-0.7	0.9	17	0.78499	1
Q3UH83_MOUSE,	1.2	0.6	1.8	8	1.1	0.4	1.8	4	0.1	-0.8	1	12	0.78766	1
Q3TDT0_MOUSE,TRIM3_MOUSE,	1.6	1.1	2.3	8	1.5	0.8	2.6	5	0.1	-1.1	1.1	13	0.7886	1
Q5F234_MOUSE,STX8_MOUSE,	-0.1	-1	0.8	3	-0.3	-1.3	0.8	2	0.2	-1.2	1.6	5	0.78874	1
Q3UYF3_MOUSE,SPN90_MOUSE,	1.6	0.7	2.3	3	1.7	1	2.5	7	-0.1	-1.3	0.9	10	0.78889	1
A8Y5N3_MOUSE,DHB11_MOUSE,	-0.2	-0.6	0.2	12	-0.1	-0.6	0.4	9	-0.1	-0.7	0.5	21	0.78904	1
NBEA_MOUSE,	1.5	1.2	1.9	22	1.5	1.1	1.9	22	0.1	-0.5	0.6	44	0.79023	1
TMED2_MOUSE,A2RS53_MOUSE,Q8C1Z9_MOUSE,	0	-0.6	0.6	6	0.1	-0.5	0.7	5	-0.1	-0.9	0.7	11	0.79054	1
CAMLG_MOUSE,	0.4	-0.3	1	5	0.2	-0.8	1.2	3	0.2	-1	1.3	8	0.79365	1
EI2BA_MOUSE,Q3UZR8_MOUSE,	1.1	0.2	2	2	1.3	0.1	2.5	2	-0.2	-1.7	1.3	4	0.79581	1
NDUS7_MOUSE,	-1.4	-1.8	-1.1	13	-1.5	-1.9	-1.1	10	0.1	-0.5	0.6	23	0.79632	1
LRRT1_MOUSE,	0	-1.3	0.7	4	-0.3	-1.2	0.6	4	0.2	-1.3	1.4	8	0.79719	1
Q3U505_MOUSE,Q61833_MOUSE,RPN2_MOUSE,	-0.4	-0.7	0	22	-0.4	-0.8	0	19	0.1	-0.5	0.6	41	0.79758	1
TMX4_MOUSE,Q0P5W2_MOUSE,	-0.1	-0.6	0.5	9	0	-0.4	0.4	9	-0.1	-0.8	0.6	18	0.79928	1
CKAP5_MOUSE,	0.9	0.4	1.3	14	0.8	0.3	1.2	18	0.1	-0.6	0.7	32	0.79939	1
NB5R1_MOUSE,	-0.5	-0.9	-0.2	17	-0.6	-0.9	-0.3	21	0.1	-0.4	0.5	38	0.80043	1
NEUM_MOUSE,	-0.6	-1	-0.3	16	-0.6	-0.9	-0.3	22	-0.1	-0.5	0.3	38	0.80047	1
SORT_MOUSE,	-0.1	-1.1	1	2	-0.2	-0.9	0.5	8	0.2	-1.1	1.4	10	0.80105	1
Q6P716_MOUSE,Q76LV5_MOUSE,RASH_MOUSE,	-0.4	-0.9	0	8	-0.5	-0.9	-0.1	10	0.1	-0.5	0.7	18	0.80146	1
FAIM2_MOUSE,	-0.2	-1.4	1	2	0	-0.7	0.7	3	-0.2	-1.5	1.2	5	0.80315	1
Q8BMR3_MOUSE,Q5RKP4_MOUSE,RPN1_MOUSE,	-0.4	-0.7	-0.1	32	-0.4	-0.6	-0.1	37	-0.1	-0.4	0.3	69	0.80315	1
1433E_MOUSE,Q5SS40_MOUSE,	1.5	1.2	1.8	18	1.6	1.3	1.8	20	-0.1	-0.5	0.4	38	0.80421	1
UBP5_MOUSE,Q3U4W8_MOUSE,	1.7	1.3	2.2	11	1.7	1.2	2.1	12	0.1	-0.5	0.7	23	0.80629	1
NDUS3_MOUSE,	-2.7	-3.1	-2.3	10	-2.8	-3.2	-2.4	9	0.1	-0.5	0.6	19	0.807	1
Q8CJ24_MOUSE,UCP5_MOUSE,A2AF76_MOUSE,Q8CJ23_MOUSE,A2AF75_MOUSE,	-0.4	-1.1	0.2	5	-0.6	-1.3	0.2	4	0.1	-0.9	1.1	9	0.80947	1
CYB5B_MOUSE,Q3TH64_MOUSE,	-0.7	-1.1	-0.3	10	-0.8	-1.2	-0.4	10	0.1	-0.5	0.6	20	0.80959	1
CUL2_MOUSE,Q571A2_MOUSE,	1.7	1.2	2.2	11	1.6	1.2	2.1	10	0.1	-0.6	0.7	21	0.81042	1
PLD3_MOUSE,	0	-1.1	1.1	2	-0.2	-1	0.7	4	0.2	-1.2	1.5	6	0.81251	1
UBP30_MOUSE,	-1.3	-2.2	-0.4	2	-1.2	-2.3	0	2	-0.2	-1.6	1.3	4	0.81302	1
Q3TPX5_MOUSE,RASM_MOUSE,	-0.3	-1	0.4	4	-0.4	-1	0.2	5	0.1	-0.8	1	9	0.81368	1
GP158_MOUSE,B1AWY4_MOUSE,	-1	-1.5	-0.4	10	-1.1	-1.6	-0.5	12	0.1	-0.6	0.8	22	0.8155	1
Q3U548_MOUSE,Q8R0M2_MOUSE,UGPA_MOUSE,	1.9	1	3.2	2	1.8	1.1	2.6	4	0.2	-1.1	1.6	6	0.81581	1
E41L3_MOUSE,	1	0.8	1.3	38	1.1	0.8	1.4	34	-0.1	-0.4	0.3	72	0.81587	1
MYH14_MOUSE,B3F3T1_MOUSE,	1	0.4	1.6	6	1.1	0.3	1.8	7	-0.1	-1.1	0.9	13	0.81589	1
MLEC_MOUSE,	-0.2	-0.6	0.2	12	-0.3	-0.7	0.1	14	0.1	-0.5	0.6	26	0.81648	1
SEPT3_MOUSE,	1.8	1.5	2.1	18	1.9	1.5	2.2	14	-0.1	-0.5	0.4	32	0.81768	1
CH055_MOUSE,	-0.6	-1.6	0.5	2	-0.7	-1.4	-0.1	5	0.1	-1.1	1.4	7	0.81871	1
PDE1A_MOUSE,Q8BRR9_MOUSE,	1.2	0.9	1.6	16	1.3	0.9	1.7	13	-0.1	-0.6	0.5	29	0.81882	1
A2AAN2_MOUSE,A2AAN1_MOUSE,SRP68_MOUSE,	0.7	0	1.3	4	0.8	0.2	1.3	7	-0.1	-0.9	0.7	11	0.81918	1
LPPR4_MOUSE,	0	-0.6	0.5	11	0.1	-0.7	0.7	8	-0.1	-0.9	0.8	19	0.8206	1
CLVS1_MOUSE,	1.1	0.4	2	3	1.3	0.3	2.3	2	-0.1	-1.4	1.2	5	0.82181	1
CCD51_MOUSE,	-1.4	-1.9	-0.9	7	-1.3	-1.9	-0.8	5	-0.1	-0.8	0.6	12	0.82211	1
LPPR2_MOUSE,	-0.5	-1.4	0.4	4	-0.4	-1.3	0.5	4	-0.1	-1.4	1.1	8	0.82331	1
PRS8_MOUSE,B1ARK2_MOUSE,	0.8	0.3	1.4	8	0.8	0.3	1.3	12	0.1	-0.7	0.8	20	0.82415	1
TDRKH_MOUSE,Q6PGG8_MOUSE,	-1.6	-2.1	-1	7	-1.5	-2.2	-0.8	5	-0.1	-0.9	0.8	12	0.82438	1
NGEF_MOUSE,	0.6	0.1	1.2	10	0.6	0	1.1	11	0.1	-0.7	0.9	21	0.82482	1
S39A7_MOUSE,Q14C53_MOUSE,	0	-0.7	0.8	3	0.2	-0.6	0.9	3	-0.1	-1.2	1	6	0.82622	1
FAF2_MOUSE,	-0.5	-1.1	0	8	-0.6	-1.1	-0.1	10	0.1	-0.6	0.8	18	0.82699	1
DBC1_MOUSE,	-1.2	-2.1	-0.4	3	-1.1	-2	-0.3	6	-0.1	-1.3	1.1	9	0.82789	1
MCAT_MOUSE,Q7TPW6_MOUSE,	-1.2	-1.8	-0.7	10	-1.3	-1.8	-0.9	11	0.1	-0.6	0.7	21	0.82792	1
Q80YP7_MOUSE,A3KML5_MOUSE,Q3UK60_MOUSE,Q8C1D9_MOUSE,VATL_MOUSE,	-0.1	-0.9	0.7	5	0.1	-0.9	1	3	-0.1	-1.3	1.1	8	0.82886	1
FXYD6_MOUSE,	0.3	-0.3	1	5	0.3	-0.3	0.8	8	0.1	-0.8	0.9	13	0.82927	1
Q6GTI3_MOUSE,Q3TD17_MOUSE,Q3U2J2_MOUSE,GTR1_MOUSE,	-1.2	-1.7	-0.7	7	-1.3	-1.8	-0.7	6	0.1	-0.7	0.8	13	0.82946	1
Q3USC7_MOUSE,GD1L1_MOUSE,	0.6	0.3	0.9	27	0.7	0.3	1	20	-0.1	-0.5	0.4	47	0.8316	1
LRRT3_MOUSE,Q4VBX1_MOUSE,	-0.7	-1.5	0.2	4	-0.5	-1.6	0.6	2	-0.2	-1.5	1.2	6	0.83176	1
Q3MIA8_MOUSE,CSN1_MOUSE,	1.6	0.9	2.5	7	1.8	1	2.5	5	-0.1	-1.2	1.1	12	0.8325	1
Q6A0D1_MOUSE,TTC35_MOUSE,	-0.1	-0.9	0.6	4	-0.2	-1.1	0.6	4	0.1	-1	1.2	8	0.83287	1
Q9QYT9_MOUSE,Q3TZI7_MOUSE,PRIO_MOUSE,Q3UG89_MOUSE,Q4FJQ7_MOUSE,Q3UF68_MOUSE,	-0.3	-0.6	0	22	-0.2	-0.6	0.1	22	-0.1	-0.5	0.4	44	0.8355	1
A2CG20_MOUSE,PRRT1_MOUSE,	-0.1	-0.7	0.5	6	-0.2	-0.7	0.4	6	0.1	-0.7	0.9	12	0.83555	1
Q3TJD0_MOUSE,S61A1_MOUSE,	-0.6	-1.6	0.3	4	-0.5	-1.3	0.2	4	-0.1	-1.4	1.1	8	0.83666	1
SYT5_MOUSE,	-0.4	-0.7	-0.1	24	-0.5	-0.8	-0.1	20	0.1	-0.4	0.5	44	0.83692	1
Q6ZQ25_MOUSE,B2RX09_MOUSE,	-0.8	-1.8	0.3	3	-0.6	-1.6	0.4	3	-0.2	-1.6	1.3	6	0.83808	1
AFAD_MOUSE,	1.8	0.8	2.7	4	1.7	0.7	2.5	4	0.1	-1.2	1.5	8	0.83883	1
Q3U232_MOUSE,Q3U1N0_MOUSE,COR1A_MOUSE,	1.6	1.2	1.9	15	1.5	1.2	1.8	17	0.1	-0.4	0.5	32	0.83927	1
OSBL1_MOUSE,Q3V156_MOUSE,	1.9	1.1	2.6	6	1.6	0.8	2.8	4	0.1	-1.3	1.3	10	0.84038	1
Q3TNH0_MOUSE,	-0.5	-1	-0.1	10	-0.6	-1	-0.2	10	0.1	-0.5	0.7	20	0.84123	1
Q3UQM7_MOUSE,Q8R0X8_MOUSE,	-0.7	-1.2	-0.3	9	-0.8	-1.3	-0.3	8	0.1	-0.6	0.7	17	0.8429	1
ABCB7_MOUSE,A2AC46_MOUSE,	-1	-1.6	-0.5	12	-1.1	-1.6	-0.6	13	0.1	-0.7	0.8	25	0.84306	1
MOSC2_MOUSE,	-1.4	-1.7	-1.1	21	-1.5	-1.8	-1.2	20	0.1	-0.3	0.4	41	0.84374	1
PDE1B_MOUSE,	1.7	1.2	2.4	10	1.7	1.1	2.3	9	0.1	-0.7	0.9	19	0.8446	1
CSN6_MOUSE,Q3UIT2_MOUSE,	0.5	-0.3	1.4	5	0.7	-0.3	1.6	2	-0.1	-1.3	1.2	7	0.84503	1
SAM50_MOUSE,	-1.2	-1.5	-0.9	32	-1.3	-1.5	-1	41	0.1	-0.3	0.4	73	0.84576	1
ILF2_MOUSE,Q3UXI9_MOUSE,	1.1	0.4	1.8	6	1	0.4	1.6	7	0.1	-0.8	1	13	0.84622	1
PSMD6_MOUSE,	2.1	1.3	3.3	9	2	1.4	2.6	8	0.1	-0.9	1.4	17	0.84689	1
Q5F283_MOUSE,PLS3_MOUSE,	-0.4	-1.2	0.5	4	-0.5	-1.7	0.7	2	0.1	-1.3	1.6	6	0.84817	1
Q3UFK0_MOUSE,EMB_MOUSE,Q3TSZ8_MOUSE,Q3TI59_MOUSE,	-0.7	-1.9	0.5	2	-0.9	-1.8	0	3	0.1	-1.3	1.6	5	0.84817	1
Q8BP79_MOUSE,CCHL_MOUSE,Q6P5G5_MOUSE,	-1.4	-2.2	-0.6	4	-1.3	-2	-0.6	7	-0.1	-1.1	1	11	0.84987	1
SE1L1_MOUSE,Q5DTL8_MOUSE,Q6GTY4_MOUSE,	-0.1	-0.7	0.6	6	0	-0.7	0.9	6	-0.1	-1.2	0.9	12	0.85098	1
TECR_MOUSE,	-0.1	-0.9	0.7	4	0	-0.7	0.6	7	-0.1	-1.1	0.9	11	0.85121	1
CAP2_MOUSE,	1.6	1.2	1.9	18	1.5	1	2	9	0.1	-0.5	0.7	27	0.85323	1
B7ZNF6_MOUSE,CTND2_MOUSE,	0.9	0.4	1.3	11	0.8	0.2	1.5	6	0.1	-0.7	0.9	17	0.85329	1
ARMC1_MOUSE,	0.2	-0.3	0.7	8	0.3	-0.4	0.9	5	-0.1	-0.9	0.7	13	0.85454	1
Q80VX2_MOUSE,OX2G_MOUSE,	-0.2	-0.6	0.1	19	-0.3	-0.6	0	17	0.1	-0.4	0.5	36	0.85534	1
SFXN4_MOUSE,	-1.6	-2.5	-0.6	3	-1.4	-2.5	-0.4	2	-0.1	-1.5	1.2	5	0.85535	1
Q6P5H4_MOUSE,Q6TA13_MOUSE,KIF1A_MOUSE,Q3UH16_MOUSE,	1.4	0.9	2	13	1.4	0.8	1.9	11	0.1	-0.7	0.9	24	0.85575	1
Q3UUF0_MOUSE,Q8C541_MOUSE,FAAH1_MOUSE,B1ASG4_MOUSE,	-0.3	-0.8	0.2	12	-0.2	-0.7	0.2	10	-0.1	-0.7	0.5	22	0.85615	1
AP1M1_MOUSE,Q3UG16_MOUSE,	1	0.5	1.4	8	1	0.5	1.5	8	-0.1	-0.7	0.6	16	0.85831	1
DLGP1_MOUSE,Q3UHD8_MOUSE,	-0.6	-1.1	-0.1	12	-0.7	-1.2	-0.1	10	0.1	-0.6	0.8	22	0.8596	1
Q9D375_MOUSE,ABHD6_MOUSE,	-0.1	-0.6	0.3	12	0	-0.6	0.5	10	-0.1	-0.7	0.6	22	0.85993	1
1433Z_MOUSE,	1.8	1.5	2	31	1.7	1.4	2	22	0.1	-0.3	0.4	53	0.86052	1
CX4NB_MOUSE,Q3TPU5_MOUSE,	-0.3	-1	0.3	5	-0.3	-0.9	0.3	5	-0.1	-0.9	0.8	10	0.86069	1
Q3UHS6_MOUSE,Q80TM2_MOUSE,TLN1_MOUSE,A2AIM8_MOUSE,	1.1	0.4	1.8	3	0.9	0	2	3	0.1	-1.2	1.2	6	0.86207	1
TIP_MOUSE,	0.3	-0.2	0.9	8	0.2	-0.6	1.1	4	0.1	-0.9	1.1	12	0.86298	1
ARL8A_MOUSE,	0.2	-0.2	0.7	9	0.3	-0.1	0.7	14	-0.1	-0.6	0.5	23	0.8637	1
Q5M9K0_MOUSE,DHB8_MOUSE,	0.9	0.1	1.7	3	0.8	-0.1	1.7	3	0.1	-1.2	1.3	6	0.86508	1
COMT_MOUSE,Q91XH4_MOUSE,	0.1	-0.6	0.9	3	0	-0.6	0.7	4	0.1	-0.9	1.1	7	0.86517	1
EFR3B_MOUSE,	-0.1	-0.5	0.2	21	-0.2	-0.5	0.2	20	0.1	-0.4	0.5	41	0.86685	1
Q3TD71_MOUSE,SCAM1_MOUSE,	0.4	0.1	0.7	29	0.3	0	0.6	28	0.1	-0.4	0.5	57	0.8672	1
Q0PD34_MOUSE,RB22A_MOUSE,	-0.3	-0.9	0.3	5	-0.4	-0.9	0.2	6	0.1	-0.7	0.9	11	0.86779	1
Q8BH40_MOUSE,STX7_MOUSE,Q9DCE1_MOUSE,	0	-0.4	0.3	13	-0.1	-0.5	0.3	12	0.1	-0.5	0.6	25	0.86807	1
SC22B_MOUSE,	0	-0.4	0.3	20	-0.1	-0.5	0.3	15	0.1	-0.4	0.5	35	0.86846	1
GPDA_MOUSE,	0.3	-0.3	0.9	9	0.4	-0.5	1.3	3	-0.1	-1.2	1	12	0.86915	1
NEGR1_MOUSE,A0A4W9_MOUSE,	-0.2	-0.6	0.1	25	-0.3	-0.6	0	27	0.1	-0.4	0.5	52	0.87042	1
RS9_MOUSE,	0.3	-0.1	0.7	10	0.2	-0.2	0.7	8	0.1	-0.5	0.6	18	0.87156	1
LYPA1_MOUSE,	0	-1	1.1	2	-0.1	-0.9	0.7	3	0.1	-1.2	1.4	5	0.87345	1
UCHL1_MOUSE,Q3TCH2_MOUSE,	0.9	0.2	1.6	4	0.8	-0.1	1.7	3	0.1	-1.1	1.3	7	0.87358	1
RENR_MOUSE,	-0.2	-0.9	0.4	7	-0.2	-0.7	0.4	5	-0.1	-0.9	0.8	12	0.8769	1
B2L13_MOUSE,Q3UGC5_MOUSE,Q543S1_MOUSE,Q3TNR7_MOUSE,	-1.4	-1.9	-0.8	9	-1.3	-1.9	-0.8	8	-0.1	-0.8	0.7	17	0.87699	1
A2AKI6_MOUSE,ITAV_MOUSE,	-0.7	-1.6	0.1	5	-0.7	-1.3	-0.1	7	-0.1	-1.1	0.9	12	0.87713	1
DIRA1_MOUSE,	1	0.4	1.6	7	0.9	0.4	1.4	7	0.1	-0.7	0.8	14	0.87732	1
ALG2_MOUSE,	0.2	-0.2	0.5	15	0.2	-0.1	0.6	16	-0.1	-0.5	0.4	31	0.87863	1
RAB15_MOUSE,Q0PD40_MOUSE,Q3TYH2_MOUSE,	-0.1	-0.6	0.3	9	-0.2	-0.7	0.3	9	0.1	-0.6	0.7	18	0.87889	1
CSN2_MOUSE,A2AQE3_MOUSE,	1.1	0.3	1.9	3	1.1	0.6	1.7	7	-0.1	-1	0.9	10	0.87907	1
A2AQY3_MOUSE,YMEL1_MOUSE,	-1.1	-1.7	-0.5	7	-1.1	-2.3	-0.2	4	0.1	-1.1	1.4	11	0.8794	1
SNP23_MOUSE,A2AKH4_MOUSE,B0R030_MOUSE,B0R029_MOUSE,Q9D3L3_MOUSE,	-1.5	-2.3	-0.7	2	-1.4	-2.1	-0.7	4	-0.1	-1.2	1	6	0.8796	1
Q3THX4_MOUSE,VPS45_MOUSE,	1.2	0.8	1.7	9	1.3	0.6	2.3	6	-0.1	-1.2	0.8	15	0.87976	1
TM143_MOUSE,	-1.3	-1.9	-0.6	5	-1.3	-2	-0.6	4	0.1	-0.9	1	9	0.87994	1
ARF5_MOUSE,	0.6	0.2	1	13	0.7	0.2	1.1	9	-0.1	-0.6	0.5	22	0.88035	1
RAB5A_MOUSE,Q4VAA1_MOUSE,	-0.3	-0.6	0	20	-0.4	-0.7	0	16	0.1	-0.4	0.5	36	0.88112	1
Q05B38_MOUSE,Q3UV11_MOUSE,K2C6B_MOUSE,Q0VDR7_MOUSE,	6.1	5.6	6.6	16	6	5.6	6.5	16	0.1	-0.6	0.7	32	0.88392	1
COPG2_MOUSE,	0.9	0.3	1.4	8	0.9	0.3	1.6	6	-0.1	-0.9	0.8	14	0.88396	1
MPCP_MOUSE,Q3THU8_MOUSE,	-1.4	-1.5	-1.2	137	-1.4	-1.6	-1.3	145	0.1	-0.1	0.3	282	0.88432	1
MIRO1_MOUSE,	-1.3	-1.6	-1	22	-1.3	-1.6	-1	23	0.1	-0.4	0.5	45	0.88451	1
CYFP1_MOUSE,	1.5	1.2	1.8	28	1.5	1.3	1.8	34	-0.1	-0.4	0.3	62	0.88544	1
KCRB_MOUSE,	-2.8	-3.3	-2.4	9	-2.8	-3.3	-2.3	8	-0.1	-0.7	0.6	17	0.88635	1
Q5M9M0_MOUSE,RL13A_MOUSE,	0.3	-0.3	0.9	4	0.3	-0.3	1	5	-0.1	-0.9	0.8	9	0.88741	1
Q52KC1_MOUSE,IF4A2_MOUSE,	1.1	0.8	1.5	21	1.2	0.9	1.5	23	-0.1	-0.5	0.4	44	0.88834	1
FFR_MOUSE,	0.9	0.5	1.3	11	0.8	0.4	1.3	13	0.1	-0.6	0.7	24	0.89148	1
HIP1_MOUSE,	0.6	-0.1	1.3	6	0.7	-0.4	1.6	5	-0.1	-1.2	1.3	11	0.89243	1
UAP56_MOUSE,	1.2	0.8	1.6	14	1.1	0.8	1.5	14	0.1	-0.4	0.6	28	0.89277	1
Q8BUM1_MOUSE,Q544R5_MOUSE,Q3V0E7_MOUSE,TADBP_MOUSE,	0.2	-0.3	0.7	7	0.3	-0.4	1	4	-0.1	-0.9	0.8	11	0.89291	1
B2RY22_MOUSE,A5D6Q8_MOUSE,	0.8	0.3	1.4	12	0.9	0.3	1.5	13	-0.1	-0.8	0.7	25	0.89326	1
B2RT97_MOUSE,PSD13_MOUSE,	1.6	1	2.2	4	1.5	1.1	2	10	0.1	-0.7	0.8	14	0.8933	1
B2RQD1_MOUSE,CECR6_MOUSE,	-0.6	-1.7	0.4	3	-0.7	-1.6	0.1	4	0.1	-1.3	1.4	7	0.89392	1
DOCK3_MOUSE,	1	0.3	1.9	4	0.9	-0.1	2.1	2	0.1	-1.3	1.5	6	0.89468	1
A2AS98_MOUSE,A1L0U6_MOUSE,NCKP1_MOUSE,A2AS97_MOUSE,	1.6	1.3	1.8	63	1.6	1.4	1.8	57	-0.1	-0.3	0.2	120	0.89613	1
CA093_MOUSE,	0.4	-0.6	1.4	2	0.5	-0.4	1.4	2	-0.1	-1.4	1.3	4	0.89721	1
S2540_MOUSE,	-1.2	-1.7	-0.6	6	-1.2	-1.8	-0.7	7	0.1	-0.7	0.8	13	0.89822	1
ARHG2_MOUSE,	0.4	-0.1	1	12	0.5	0.1	0.9	15	-0.1	-0.7	0.6	27	0.89913	1
SRPRB_MOUSE,	-0.1	-0.7	0.6	6	0	-0.8	0.8	4	-0.1	-1.1	1	10	0.89923	1
RRAS2_MOUSE,	-1.2	-2	-0.3	3	-1.2	-1.7	-0.6	7	-0.1	-1	1	10	0.8993	1
Q6NXI9_MOUSE,KIF5C_MOUSE,Q8CHF1_MOUSE,KIF5A_MOUSE,Q3TY51_MOUSE,	0.9	0.3	1.5	5	0.8	0.2	1.5	4	0.1	-0.8	0.9	9	0.90033	1
Q3THJ6_MOUSE,RL10_MOUSE,	0.3	-0.3	0.9	8	0.3	-0.2	0.7	10	0.1	-0.7	0.8	18	0.90445	1
SYT17_MOUSE,	1.4	0.5	2.3	2	1.3	0.7	2.7	7	-0.1	-1.6	1.2	9	0.9079	1
Q5KU03_MOUSE,GSK3B_MOUSE,	1	0.5	1.4	11	1	0.5	1.6	9	-0.1	-0.8	0.7	20	0.90816	1
A6H5Z3_MOUSE,	1	0.5	1.6	8	1.1	0.3	1.8	7	-0.1	-1	0.9	15	0.91185	1
B7ZN48_MOUSE,B7ZN50_MOUSE,	-0.9	-1.7	0	4	-0.9	-1.7	-0.2	5	0.1	-1.1	1.2	9	0.91434	1
B0LXL6_MOUSE,C1QL3_MOUSE,	0.3	-0.8	1.4	2	0.4	-0.6	1.3	2	-0.1	-1.5	1.4	4	0.91635	1
RDH14_MOUSE,	-1.3	-1.8	-0.9	10	-1.4	-1.8	-1	10	0.1	-0.6	0.7	20	0.91644	1
GNL1_MOUSE,	1.1	0.3	1.8	8	1	0.3	1.8	6	0.1	-1.1	1.1	14	0.91817	1
S27A4_MOUSE,Q3TD48_MOUSE,A2ARC5_MOUSE,	-0.6	-1.3	0.1	5	-0.5	-1.1	0	11	-0.1	-0.9	0.8	16	0.91887	1
LPPRC_MOUSE,	0	-0.3	0.3	34	0	-0.3	0.3	30	0.1	-0.4	0.5	64	0.92015	1
EIF3A_MOUSE,	1.4	0.8	1.9	9	1.4	0.7	2.1	7	-0.1	-1	0.8	16	0.92249	1
BRSK1_MOUSE,	0.7	0	1.6	5	0.8	0.2	1.4	6	-0.1	-1	0.9	11	0.92303	1
RS6_MOUSE,Q5BLK1_MOUSE,	0.3	-0.2	0.8	12	0.3	-0.2	0.7	13	0.1	-0.6	0.7	25	0.92418	1
MARK2_MOUSE,Q3T9A3_MOUSE,Q571J8_MOUSE,	0.8	0.3	1.3	9	0.8	0.3	1.3	8	0.1	-0.6	0.7	17	0.92506	1
TOM40_MOUSE,	-1.5	-1.8	-1.2	24	-1.6	-1.9	-1.3	20	0.1	-0.3	0.4	44	0.92671	1
TM201_MOUSE,B2KFP3_MOUSE,	-0.3	-1.1	0.5	3	-0.4	-1.2	0.4	4	0.1	-1.1	1.2	7	0.92742	1
Q6GTD3_MOUSE,	-1.1	-1.3	-0.9	72	-1.2	-1.4	-1	72	0.1	-0.2	0.3	144	0.93137	1
B2RY15_MOUSE,	2	1.4	2.6	12	2.1	1.4	2.7	11	-0.1	-1	0.8	23	0.93388	1
Q2TJI9_MOUSE,	-0.3	-0.8	0.2	9	-0.3	-0.9	0.3	6	0.1	-0.7	0.8	15	0.9341	1
K0090_MOUSE,A1L2Z3_MOUSE,A2AMV0_MOUSE,	-0.3	-0.9	0.3	10	-0.2	-0.8	0.3	9	-0.1	-0.8	0.7	19	0.93482	1
A2A838_MOUSE,A2AD32_MOUSE,A2A839_MOUSE,A2A840_MOUSE,A2A841_MOUSE,Q3UH12_MOUSE,B6ZHC8_MOUSE,41_MOUSE,A2A842_MOUSE,	1.2	0.6	1.9	4	1.3	0.6	2	4	-0.1	-1	0.9	8	0.93672	1
ATLA2_MOUSE,	0.4	-0.1	0.9	12	0.4	-0.1	1	13	-0.1	-0.7	0.6	25	0.93875	1
CSPG5_MOUSE,	-0.5	-1	-0.1	12	-0.6	-1.1	-0.1	10	0.1	-0.6	0.7	22	0.93891	1
A2AUA8_MOUSE,Q7TQG7_MOUSE,Q3TZE2_MOUSE,ADA11_MOUSE,	-0.6	-1.6	0.4	2	-0.6	-1.1	0	6	-0.1	-1.2	1.1	8	0.94175	1
B1B1B4_MOUSE,ETFA_MOUSE,	6	5.5	6.6	15	6	5.5	6.5	11	0.1	-0.7	0.8	26	0.94344	1
Q3TXV4_MOUSE,	-1	-1.6	-0.4	6	-1.1	-1.6	-0.5	6	0.1	-0.7	0.8	12	0.94672	1
C1TM_MOUSE,	-0.6	-1.3	0	7	-0.7	-1.5	0.1	7	0.1	-0.9	1	14	0.94675	1
ELMD2_MOUSE,	-1.2	-1.9	-0.2	3	-1.1	-2	-0.1	2	-0.1	-1.3	1.3	5	0.94814	1
Q91VJ6_MOUSE,Q3T9U9_MOUSE,Q3UB67_MOUSE,Q3UB90_MOUSE,Q3UB15_MOUSE,	0.5	0.1	1	8	0.5	0	1	8	0.1	-0.6	0.8	16	0.94891	1
Q8R3Q1_MOUSE,	-1.8	-2.7	-0.9	2	-1.7	-2.5	-0.9	3	-0.1	-1.3	1.2	5	0.95035	1
A3R459_MUSMC,A3E4B4_MOUSE,A3R485_MOUSE,NU3M_MOUSE,Q5GA77_MUSMM,Q7GIP5_MOUSE,	-1.6	-2.5	-0.8	3	-1.6	-2.4	-0.8	3	-0.1	-1.2	1.1	6	0.95325	1
Q3TRI5_MOUSE,PISD_MOUSE,Q505E1_MOUSE,	-1.1	-2	-0.2	3	-1	-1.8	-0.3	4	-0.1	-1.2	1.1	7	0.95664	1
Q0VBU4_MOUSE,CC47_MOUSE,	-0.4	-1.3	0.5	3	-0.3	-1.3	0.7	2	-0.1	-1.4	1.3	5	0.95778	1
GRIN1_MOUSE,	-1.3	-1.8	-0.7	6	-1.2	-1.7	-0.7	8	-0.1	-0.8	0.7	14	0.95796	1
Q3TL79_MOUSE,AHSA1_MOUSE,	1	0.5	1.4	9	1	0.6	1.5	8	-0.1	-0.7	0.6	17	0.95813	1
Q544G1_MOUSE,GBRA2_MOUSE,	-0.3	-0.9	0.3	8	-0.2	-0.7	0.2	10	-0.1	-0.8	0.7	18	0.95875	1
CPT1C_MOUSE,	0.5	0	0.9	13	0.5	0	1.1	10	-0.1	-0.7	0.6	23	0.96366	1
A3KFW2_MOUSE,TINAL_MOUSE,Q4FJX7_MOUSE,	-1.1	-1.8	-0.3	4	-1.1	-1.9	-0.3	4	0.1	-1	1.2	8	0.96619	1
LRC4C_MOUSE,	-0.7	-1.3	0	8	-0.7	-1.4	-0.1	6	0.1	-0.8	0.9	14	0.97977	1
1433F_MOUSE,	1.5	1.2	1.9	16	1.6	1.2	1.9	12	0	-0.5	0.5	28	1	1
PSD7_MOUSE,A1L3B8_MOUSE,	1.5	1	2.1	8	1.5	0.7	2.3	8	0	-1	1	16	1	1
DJC11_MOUSE,A2A8C9_MOUSE,	-1.4	-1.7	-1.1	24	-1.4	-1.7	-1.1	24	0	-0.4	0.4	48	1	1
A2ACM7_MOUSE,	0.1	-0.4	0.5	12	0.1	-0.4	0.6	11	0	-0.7	0.7	23	1	1
Q3TA78_MOUSE,A2AD89_MOUSE,ATAD3_MOUSE,	-1.4	-1.7	-1.1	26	-1.4	-1.7	-1.1	21	0	-0.4	0.4	47	1	1
STX12_MOUSE,A2ADS0_MOUSE,	0.1	-0.3	0.4	16	0	-0.3	0.4	15	0	-0.4	0.5	31	1	1
GSTM1_MOUSE,A2AE89_MOUSE,	1.1	0.2	2	2	1.2	0.3	2	2	0	-1.2	1.2	4	1	1
Q8BQW4_MOUSE,RHG01_MOUSE,A2AGT9_MOUSE,	1.8	1.4	2.1	21	1.7	1.4	2.1	25	0	-0.4	0.5	46	1	1
A2AI21_MOUSE,NMDZ1_MOUSE,	-0.6	-0.9	-0.3	37	-0.6	-0.9	-0.4	42	0	-0.4	0.4	79	1	1
A2ALL9_MOUSE,	-0.7	-0.9	-0.6	114	-0.8	-0.9	-0.6	110	0	-0.2	0.2	224	1	1
A2AQN1_MOUSE,GGT7_MOUSE,	-0.1	-0.7	0.4	10	-0.1	-0.7	0.4	8	0	-0.7	0.8	18	1	1
DPM1_MOUSE,A2BDX1_MOUSE,	0.2	-0.6	1.1	3	0.2	-0.5	1	4	0	-1.1	1.1	7	1	1
A2CG14_MOUSE,RALA_MOUSE,	-0.4	-0.7	0	12	-0.4	-0.8	0	14	0	-0.5	0.6	26	1	1
A2RRK1_MOUSE,	0.1	-0.9	1.2	3	0.1	-0.9	1.2	3	0	-1.5	1.5	6	1	1
A2VDF7_MOUSE,S4A4_MOUSE,A7E1Z5_MOUSE,	-1.6	-1.9	-1.3	33	-1.6	-1.8	-1.3	36	0	-0.4	0.4	69	1	1
B0F2B4_MOUSE,B1P942_MOUSE,A7LAI9_MOUSE,	-0.8	-1.3	-0.2	9	-0.8	-1.3	-0.3	10	0	-0.7	0.7	19	1	1
LIGO1_MOUSE,A9DA50_MOUSE,	-0.8	-1.2	-0.4	12	-0.8	-1.2	-0.4	13	0	-0.6	0.6	25	1	1
ABCB8_MOUSE,	-0.9	-1.4	-0.5	15	-1	-1.4	-0.5	13	0	-0.6	0.6	28	1	1
ABD12_MOUSE,	-0.4	-0.7	-0.1	19	-0.4	-0.7	-0.1	24	0	-0.4	0.4	43	1	1
Q6GTG6_MOUSE,ACSL1_MOUSE,	-0.9	-1.2	-0.5	20	-0.9	-1.2	-0.5	21	0	-0.5	0.5	41	1	1
ADCK1_MOUSE,	-1.5	-2	-1	9	-1.5	-2	-1	10	0	-0.7	0.7	19	1	1
ADCL1_MOUSE,	-0.2	-0.6	0.1	19	-0.3	-0.6	0.1	23	0	-0.4	0.5	42	1	1
AOFB_MOUSE,Q14CG9_MOUSE,	0	-0.3	0.2	37	0	-0.3	0.2	45	0	-0.4	0.3	82	1	1
AP2A1_MOUSE,	1.2	1.1	1.4	103	1.3	1.1	1.4	95	0	-0.2	0.2	198	1	1
AP3M2_MOUSE,	1.3	0.9	1.7	13	1.3	0.9	1.8	12	0	-0.6	0.6	25	1	1
AT1A1_MOUSE,	-1.1	-1.2	-0.9	397	-1.1	-1.2	-1	394	0	-0.1	0.2	791	1	1
AT1A3_MOUSE,	-0.8	-0.9	-0.7	568	-0.8	-1	-0.7	572	0	-0.1	0.2	1140	1	1
ATAD1_MOUSE,	-1.4	-1.7	-1.1	19	-1.4	-1.7	-1.1	17	0	-0.5	0.4	36	1	1
SYPH_MOUSE,B1AVA7_MOUSE,	0.4	0.2	0.7	43	0.5	0.2	0.7	44	0	-0.3	0.3	87	1	1
Q8CAB3_MOUSE,B1AVY2_MOUSE,GBRA3_MOUSE,B1B015_MOUSE,	-0.3	-0.9	0.3	9	-0.3	-0.7	0.2	10	0	-0.7	0.7	19	1	1
B1AW58_MOUSE,KCC1D_MOUSE,	1.1	0.5	1.8	3	1.1	0.4	1.7	3	0	-0.9	0.9	6	1	1
B1AWN6_MOUSE,	-0.5	-0.9	-0.1	18	-0.5	-0.9	-0.1	22	0	-0.5	0.5	40	1	1
S4A10_MOUSE,B1AWV8_MOUSE,	-0.8	-1.1	-0.5	36	-0.8	-1.1	-0.6	38	0	-0.4	0.4	74	1	1
B2KFH2_MOUSE,B1ASC0_MOUSE,B2KFH1_MOUSE,B2KFH0_MOUSE,BAI2_MOUSE,	-0.3	-1.2	0.6	3	-0.3	-1.3	0.8	2	0	-1.4	1.3	5	1	1
B2KGQ6_MOUSE,GDPD1_MOUSE,	-0.2	-0.7	0.2	13	-0.2	-0.6	0.2	14	0	-0.6	0.5	27	1	1
Q0PD56_MOUSE,B2RPS1_MOUSE,RAB5B_MOUSE,	-0.1	-0.5	0.2	14	-0.2	-0.5	0.2	16	0	-0.4	0.5	30	1	1
B2RRN5_MOUSE,Q3TSQ6_MOUSE,Q3ULK1_MOUSE,	0.1	-0.4	0.6	7	0.1	-0.4	0.6	8	0	-0.7	0.6	15	1	1
PRR7_MOUSE,B2RSG4_MOUSE,	-0.7	-1.4	0.1	3	-0.7	-1.4	0	3	0	-1	1	6	1	1
HECAM_MOUSE,B2RSY3_MOUSE,	-1.5	-1.9	-1.1	13	-1.5	-1.8	-1.1	12	0	-0.6	0.5	25	1	1
AAK1_MOUSE,B2RUJ0_MOUSE,	1.2	0.9	1.5	34	1.2	0.9	1.6	30	0	-0.4	0.4	64	1	1
B2RXS4_MOUSE,	-1.1	-1.8	-0.5	5	-1.2	-2.1	-0.3	3	0	-1.1	1.1	8	1	1
BASP1_MOUSE,	-2.7	-3	-2.5	31	-2.7	-3	-2.5	28	0	-0.3	0.3	59	1	1
Q3UF95_MOUSE,BAT3_MOUSE,	0.9	0.3	1.4	8	0.9	0.3	1.4	9	0	-0.8	0.8	17	1	1
BPNT1_MOUSE,	0.2	-0.3	0.7	12	0.2	-0.4	0.7	13	0	-0.7	0.8	25	1	1
BRI3B_MOUSE,	-0.1	-0.8	0.7	4	0	-1.2	1.1	2	0	-1.4	1.3	6	1	1
C109A_MOUSE,	-1.3	-1.7	-1	14	-1.4	-1.8	-1	16	0	-0.5	0.6	30	1	1
CA2D3_MOUSE,	-1.3	-1.9	-0.7	6	-1.3	-1.8	-0.8	10	0	-0.8	0.7	16	1	1
CADM4_MOUSE,	-1.5	-1.8	-1.3	28	-1.6	-1.9	-1.3	24	0	-0.4	0.4	52	1	1
CAMKV_MOUSE,	1.5	1.2	1.7	31	1.5	1.3	1.7	43	0	-0.4	0.3	74	1	1
CAPS1_MOUSE,	1	0.8	1.2	83	1	0.8	1.2	91	0	-0.2	0.2	174	1	1
CC90B_MOUSE,	-1.2	-2.2	-0.2	2	-1.2	-2.1	-0.3	3	0	-1.4	1.4	5	1	1
CCNY_MOUSE,	-0.4	-0.9	0.1	10	-0.4	-1	0.2	8	0	-0.7	0.7	18	1	1
CHCH3_MOUSE,	-1.7	-2	-1.4	17	-1.7	-2	-1.3	12	0	-0.5	0.5	29	1	1
B1AZ39_MOUSE,CHMP6_MOUSE,	-1	-1.8	-0.3	4	-1	-1.7	-0.3	5	0	-1	1	9	1	1
CKAP4_MOUSE,	-0.6	-0.9	-0.3	22	-0.6	-1	-0.3	16	0	-0.4	0.5	38	1	1
CNTN1_MOUSE,	-0.7	-0.9	-0.5	91	-0.8	-0.9	-0.6	80	0	-0.2	0.3	171	1	1
CS052_MOUSE,	-1.3	-1.6	-1	21	-1.3	-1.6	-0.9	14	0	-0.5	0.4	35	1	1
A2AT94_MOUSE,CT103_MOUSE,	-0.8	-1.8	0.2	2	-0.8	-1.6	-0.1	3	0	-1.2	1.3	5	1	1
CTNB1_MOUSE,Q3UZT7_MOUSE,	0.9	0.5	1.2	21	0.8	0.5	1.2	26	0	-0.4	0.5	47	1	1
CYFP2_MOUSE,	1.6	1.4	1.8	62	1.5	1.3	1.8	66	0	-0.3	0.3	128	1	1
D1FNM8_MOUSE,	0	-0.2	0.1	160	0	-0.2	0.2	160	0	-0.2	0.2	320	1	1
DCAKD_MOUSE,	-0.6	-1.3	0	5	-0.6	-1.3	0	6	0	-0.9	0.9	11	1	1
Q8CHG1_MOUSE,A3KN70_MOUSE,DCLK1_MOUSE,	1.2	0.8	1.5	16	1.1	0.7	1.5	14	0	-0.5	0.6	30	1	1
Q6NZM3_MOUSE,DCTN1_MOUSE,	1.1	0.7	1.5	22	1.1	0.8	1.6	23	0	-0.6	0.5	45	1	1
DGKB_MOUSE,	0.3	-0.8	1.4	2	0.3	-0.6	1.2	3	0	-1.4	1.4	5	1	1
DGKE_MOUSE,B2KGR9_MOUSE,	0.2	-0.5	0.9	4	0.2	-0.6	0.9	4	0	-1	1	8	1	1
DHRS1_MOUSE,	-0.1	-0.5	0.4	12	-0.1	-0.6	0.4	11	0	-0.6	0.6	23	1	1
DIC_MOUSE,B1ATZ4_MOUSE,	-1.4	-2	-0.9	6	-1.5	-2	-1	10	0	-0.7	0.8	16	1	1
DLG1_MOUSE,Q3UP61_MOUSE,	-0.9	-1.2	-0.6	24	-0.8	-1.2	-0.5	23	0	-0.5	0.4	47	1	1
DLG2_MOUSE,	-0.8	-1	-0.6	57	-0.8	-1	-0.5	48	0	-0.3	0.2	105	1	1
A2AUE2_MOUSE,DNJC5_MOUSE,	-0.1	-0.4	0.1	51	-0.2	-0.4	0.1	47	0	-0.3	0.4	98	1	1
DYHC1_MOUSE,	0.9	0.7	1	307	0.8	0.7	1	340	0	-0.2	0.2	647	1	1
Q3UYK6_MOUSE,EAA2_MOUSE,A2APL8_MOUSE,	-1.5	-1.6	-1.4	375	-1.5	-1.7	-1.4	354	0	-0.1	0.2	729	1	1
ECHM_MOUSE,	-1.1	-1.8	-0.4	4	-1.1	-1.8	-0.3	4	0	-1	1	8	1	1
EHD3_MOUSE,	1.4	1.1	1.7	38	1.4	1.1	1.7	31	0	-0.4	0.3	69	1	1
Q921R1_MOUSE,ENTP2_MOUSE,Q3T9U8_MOUSE,	-1	-1.4	-0.6	14	-1	-1.5	-0.5	12	0	-0.6	0.6	26	1	1
EPMIP_MOUSE,	1.6	1.2	2	13	1.6	1	2.2	12	0	-0.7	0.7	25	1	1
EXOG_MOUSE,	-1.1	-1.5	-0.8	16	-1.1	-1.4	-0.8	17	0	-0.5	0.4	33	1	1
FA49A_MOUSE,	0.8	0.5	1.1	22	0.8	0.5	1.1	21	0	-0.4	0.4	43	1	1
FAS_MOUSE,	1.4	1.1	1.6	53	1.3	1.1	1.6	41	0	-0.3	0.4	94	1	1
FKBP8_MOUSE,	-0.5	-1	0	10	-0.5	-1	-0.1	12	0	-0.6	0.7	22	1	1
GABR2_MOUSE,	-0.3	-0.7	0.1	14	-0.3	-0.8	0.3	9	0	-0.7	0.6	23	1	1
GDE1_MOUSE,	-0.1	-0.5	0.3	11	-0.1	-0.6	0.3	13	0	-0.6	0.6	24	1	1
GHC1_MOUSE,	-1.2	-1.4	-1	46	-1.2	-1.5	-1	52	0	-0.3	0.3	98	1	1
Q542R8_MOUSE,GNAZ_MOUSE,	-0.5	-0.7	-0.2	30	-0.5	-0.8	-0.3	30	0	-0.3	0.4	60	1	1
GPDM_MOUSE,	-1.3	-1.5	-1.1	88	-1.3	-1.4	-1.1	109	0	-0.2	0.2	197	1	1
GPM6A_MOUSE,Q542P2_MOUSE,	-0.9	-1	-0.7	99	-0.9	-1.1	-0.8	108	0	-0.2	0.3	207	1	1
C9K0Y3_MOUSE,GRIA1_MOUSE,	-0.3	-0.6	0	42	-0.3	-0.6	-0.1	40	0	-0.3	0.4	82	1	1
GRM5_MOUSE,B2BH30_MOUSE,	0.3	-0.2	0.7	10	0.3	-0.1	0.7	11	0	-0.6	0.6	21	1	1
HNRPK_MOUSE,Q3U9Q3_MOUSE,Q3TJ38_MOUSE,B2M1R6_MOUSE,Q3TL71_MOUSE,Q5FWJ5_MOUSE,Q3U6X2_MOUSE,Q3TUA1_MOUSE,	0.4	-0.1	1	7	0.4	-0.2	1	7	0	-0.8	0.8	14	1	1
HPCL4_MOUSE,B2RRY8_MOUSE,	0.4	-0.5	1.3	3	0.4	-0.4	1.3	4	0	-1.2	1.2	7	1	1
HSDL1_MOUSE,	-0.9	-1.2	-0.5	24	-0.9	-1.2	-0.6	23	0	-0.4	0.4	47	1	1
IGSF8_MOUSE,	0	-0.2	0.3	42	0	-0.2	0.3	46	0	-0.3	0.3	88	1	1
Q6GTI5_MOUSE,IMB1_MOUSE,Q3TFE8_MOUSE,	1.1	0.9	1.4	34	1.1	0.9	1.4	36	0	-0.4	0.3	70	1	1
IQEC2_MOUSE,	-0.7	-1	-0.4	37	-0.6	-0.9	-0.4	50	0	-0.4	0.3	87	1	1
JAM3_MOUSE,	-2.7	-3.2	-2.1	5	-2.6	-3.1	-2.1	5	0	-0.8	0.7	10	1	1
K1468_MOUSE,	1	0.6	1.3	20	1	0.6	1.4	20	0	-0.5	0.5	40	1	1
K1549_MOUSE,	-0.2	-0.8	0.6	10	-0.1	-0.8	0.5	8	0	-0.9	0.9	18	1	1
K1C17_MOUSE,	5.5	4.8	6.5	14	5.5	4.8	6.2	12	0	-1	1.2	26	1	1
K6PF_MOUSE,	1.3	1.1	1.5	64	1.2	1	1.4	54	0	-0.2	0.3	118	1	1
KAPCB_MOUSE,	1.4	1.1	1.7	27	1.4	1.1	1.7	29	0	-0.4	0.3	56	1	1
KCC2G_MOUSE,	-1.2	-1.4	-1.1	79	-1.2	-1.4	-1	81	0	-0.3	0.2	160	1	1
KCNA2_MOUSE,B2RS05_MOUSE,	-1.3	-1.7	-0.9	16	-1.4	-1.8	-0.9	10	0	-0.5	0.6	26	1	1
LPCT4_MOUSE,	-0.2	-0.8	0.4	7	-0.2	-0.7	0.4	8	0	-0.8	0.8	15	1	1
LRC8A_MOUSE,	-1.6	-2.6	-0.6	3	-1.6	-2.4	-0.7	4	0	-1.4	1.4	7	1	1
MARE2_MOUSE,	1	0.7	1.4	18	1.1	0.7	1.4	17	0	-0.5	0.4	35	1	1
MARK4_MOUSE,	0.9	0	1.8	2	0.9	0.3	1.5	4	0	-1.1	1.1	6	1	1
Q3TTX0_MOUSE,MATR3_MOUSE,Q5BL18_MOUSE,Q6ZQ61_MOUSE,Q4FJT0_MOUSE,	1	0.6	1.4	18	1	0.5	1.4	12	0	-0.6	0.7	30	1	1
MGLL_MOUSE,Q3UFX6_MOUSE,	0.9	0.4	1.4	10	0.9	0.4	1.5	11	0	-0.7	0.7	21	1	1
MIRO2_MOUSE,	-1.2	-1.6	-0.8	16	-1.2	-1.7	-0.8	10	0	-0.6	0.6	26	1	1
NB5R3_MOUSE,	-0.4	-0.7	-0.1	28	-0.4	-0.7	-0.1	26	0	-0.4	0.4	54	1	1
NCAM2_MOUSE,	0.2	0	0.4	52	0.3	0	0.5	57	0	-0.3	0.3	109	1	1
NCDN_MOUSE,	1.1	0.9	1.3	78	1.1	0.9	1.3	71	0	-0.2	0.3	149	1	1
NCPR_MOUSE,	-0.2	-0.5	0.1	24	-0.2	-0.5	0.1	22	0	-0.4	0.4	46	1	1
Q544I1_MOUSE,Q8VCV2_MOUSE,NDRG3_MOUSE,	1.3	0.7	2	5	1.4	0.6	2.2	3	0	-1.1	0.9	8	1	1
NDUBA_MOUSE,	-1.5	-1.8	-1.2	20	-1.6	-1.9	-1.3	21	0	-0.4	0.5	41	1	1
NDUS2_MOUSE,	-1.8	-2	-1.5	37	-1.7	-2	-1.5	32	0	-0.4	0.3	69	1	1
NEUA_MOUSE,	2	1.3	2.9	5	2.1	1.4	2.7	6	0	-1	1	11	1	1
NLF3_MOUSE,	1.7	1.1	2.4	5	1.7	1.1	2.3	6	0	-0.8	0.9	11	1	1
NMDE1_MOUSE,	-1.2	-1.7	-0.8	14	-1.3	-1.8	-0.8	11	0	-0.6	0.7	25	1	1
NTRK2_MOUSE,	-0.8	-1.1	-0.4	22	-0.8	-1.1	-0.5	26	0	-0.4	0.5	48	1	1
NTRK3_MOUSE,	-0.8	-1.3	-0.2	7	-0.7	-1.4	-0.1	9	0	-0.9	0.8	16	1	1
Q3TNL9_MOUSE,Q7JD06_MOUSE,A3E4A7_MOUSE,Q5GA84_MUSMM,B9V1J9_MOUSE,Q4JFN6_MOUSE,NU1M_MOUSE,	-1.5	-2	-1	9	-1.4	-1.9	-1	9	0	-0.7	0.6	18	1	1
OXR1_MOUSE,	1.6	0.9	2.1	10	1.6	1.1	2.1	7	0	-0.8	0.7	17	1	1
PCBP1_MOUSE,	0.5	0	1.1	6	0.5	0	1.1	9	0	-0.8	0.8	15	1	1
B2M1R7_MOUSE,PCBP2_MOUSE,	0.8	0.3	1.2	9	0.8	0.4	1.2	15	0	-0.6	0.6	24	1	1
PGAP1_MOUSE,	0.5	0	1.1	6	0.6	-0.1	1.2	5	0	-0.9	0.8	11	1	1
PGM2L_MOUSE,	1.3	1.1	1.6	35	1.4	1.2	1.6	41	0	-0.4	0.3	76	1	1
PHB2_MOUSE,Q3V235_MOUSE,	-1.3	-1.6	-1.1	34	-1.3	-1.5	-1	32	0	-0.4	0.3	66	1	1
PHB_MOUSE,	-0.9	-1.2	-0.6	27	-0.9	-1.2	-0.6	23	0	-0.4	0.4	50	1	1
PLPP_MOUSE,	1.9	1.6	2.3	19	2	1.5	2.5	16	0	-0.6	0.5	35	1	1
PLXA1_MOUSE,	-0.7	-1.2	-0.3	19	-0.8	-1.3	-0.3	16	0	-0.6	0.7	35	1	1
PRAF3_MOUSE,	0.2	-0.5	0.9	4	0.2	-0.6	0.9	5	0	-0.9	1	9	1	1
PTAD1_MOUSE,	0	-0.7	0.6	6	0	-0.6	0.6	6	0	-0.9	0.9	12	1	1
PTPRS_MOUSE,	-0.6	-0.9	-0.3	37	-0.6	-0.9	-0.4	36	0	-0.4	0.4	73	1	1
PURA_MOUSE,	0.9	0.5	1.3	8	0.9	0.5	1.3	9	0	-0.6	0.6	17	1	1
PYRD_MOUSE,	-1.2	-1.6	-0.9	14	-1.3	-1.6	-0.9	17	0	-0.5	0.5	31	1	1
RAB3B_MOUSE,Q0PD62_MOUSE,	-0.1	-0.5	0.2	18	-0.1	-0.5	0.2	18	0	-0.5	0.5	36	1	1
Q0PD63_MOUSE,RAB3A_MOUSE,	-0.2	-0.4	0	69	-0.2	-0.4	0	69	0	-0.3	0.3	138	1	1
Q571F3_MOUSE,Q0VB06_MOUSE,NECP1_MOUSE,	1.2	0.5	1.9	3	1.2	0.6	1.8	4	0	-0.9	0.9	7	1	1
B1AXF3_MOUSE,Q14AY1_MOUSE,	-1.8	-2.6	-1.1	4	-1.9	-2.6	-1.1	4	0	-1	1.1	8	1	1
Q14BH8_MOUSE,	-0.8	-1	-0.6	47	-0.8	-1.1	-0.6	49	0	-0.3	0.4	96	1	1
Q1WIL9_MOUSE,CADM1_MOUSE,	-0.5	-0.8	-0.1	32	-0.5	-0.8	-0.1	32	0	-0.4	0.4	64	1	1
K2C5_MOUSE,Q32P04_MOUSE,	6.1	5.7	6.5	29	6.1	5.7	6.5	33	0	-0.5	0.5	62	1	1
Q3TXU8_MOUSE,PGRC1_MOUSE,Q3TFP8_MOUSE,Q3TH84_MOUSE,	0.5	0.1	1	9	0.5	0.1	0.9	11	0	-0.6	0.6	20	1	1
Q8C454_MOUSE,A2AT31_MOUSE,MTX2_MOUSE,Q2M4G1_MOUSE,Q3TI40_MOUSE,Q3TI19_MOUSE,	-0.7	-1.7	0.3	2	-0.7	-1.7	0.3	2	0	-1.4	1.5	4	1	1
RAB5C_MOUSE,Q3TJ39_MOUSE,	-0.4	-0.7	0	17	-0.4	-0.7	-0.1	20	0	-0.5	0.5	37	1	1
Q3TKP3_MOUSE,ATX10_MOUSE,	1.4	0.9	1.8	11	1.4	1	1.8	12	0	-0.6	0.6	23	1	1
Q4FJP8_MOUSE,Q3TPL8_MOUSE,Q8BLF7_MOUSE,GTR3_MOUSE,	-0.3	-0.7	0	20	-0.3	-0.6	0.1	19	0	-0.5	0.4	39	1	1
Q3TQ70_MOUSE,GBB1_MOUSE,	-0.6	-0.8	-0.4	57	-0.6	-0.8	-0.4	51	0	-0.2	0.3	108	1	1
VPS35_MOUSE,Q3TRJ1_MOUSE,	3	2.7	3.3	20	3	2.5	3.4	20	0	-0.5	0.6	40	1	1
Q3TRX4_MOUSE,Q6ZQE7_MOUSE,PALM_MOUSE,Q542N8_MOUSE,	-1.3	-1.7	-0.9	15	-1.3	-1.7	-0.9	16	0	-0.5	0.6	31	1	1
Q3TS84_MOUSE,Q3UIJ1_MOUSE,Q3TPJ5_MOUSE,EXD2_MOUSE,	-1	-1.9	0	3	-1	-1.9	0	3	0	-1.4	1.3	6	1	1
Q3TV75_MOUSE,Q3TIC8_MOUSE,QCR1_MOUSE,	-1.4	-1.6	-1.2	83	-1.4	-1.6	-1.3	100	0	-0.2	0.3	183	1	1
Q99JZ4_MOUSE,Q3TXJ4_MOUSE,	0.3	-0.4	0.9	5	0.3	-0.2	0.8	8	0	-0.8	0.7	13	1	1
NTRI_MOUSE,Q8BG33_MOUSE,Q3TYC2_MOUSE,	-1.7	-1.9	-1.4	35	-1.7	-2	-1.5	30	0	-0.3	0.4	65	1	1
Q3U125_MOUSE,CJ058_MOUSE,	-0.4	-0.8	0	15	-0.4	-0.7	0	16	0	-0.5	0.5	31	1	1
KAD4_MOUSE,Q3U489_MOUSE,	-0.3	-0.8	0.1	11	-0.4	-0.9	0.2	9	0	-0.6	0.7	20	1	1
GBB2_MOUSE,Q3U9V4_MOUSE,	-0.6	-0.8	-0.3	45	-0.6	-0.8	-0.4	39	0	-0.3	0.3	84	1	1
Q3UAP1_MOUSE,PREB_MOUSE,	0	-0.8	0.8	4	0	-0.7	0.7	4	0	-1.1	1.1	8	1	1
Q3UB66_MOUSE,	-0.7	-0.9	-0.5	40	-0.8	-1	-0.5	39	0	-0.3	0.4	79	1	1
Q3UDQ7_MOUSE,AFG32_MOUSE,	-1.3	-1.5	-1	41	-1.3	-1.5	-1	33	0	-0.3	0.3	74	1	1
Q3UGY4_MOUSE,B2RX08_MOUSE,Q3UGX2_MOUSE,	1.4	1	1.8	14	1.4	1.1	1.8	14	0	-0.6	0.5	28	1	1
Q3UH69_MOUSE,Q3UH37_MOUSE,B9EIV5_MOUSE,	0.9	0.5	1.4	15	1	0.5	1.4	18	0	-0.6	0.6	33	1	1
AP1G1_MOUSE,Q3UKX8_MOUSE,Q8CBB7_MOUSE,	0.9	0.5	1.2	21	0.9	0.6	1.2	21	0	-0.5	0.4	42	1	1
Q3UL45_MOUSE,	-1.4	-1.8	-1.1	19	-1.4	-1.7	-1.1	19	0	-0.5	0.4	38	1	1
Q3TGW0_MOUSE,Q3TWJ4_MOUSE,Q3ULF7_MOUSE,ARP3_MOUSE,	1.5	0.9	2	8	1.5	0.9	2	6	0	-0.8	0.7	14	1	1
Q3ULL9_MOUSE,	-1.2	-1.7	-0.8	12	-1.2	-1.7	-0.7	8	0	-0.7	0.7	20	1	1
Q3US81_MOUSE,	-1	-1.3	-0.8	63	-1.1	-1.3	-0.9	73	0	-0.2	0.3	136	1	1
Q3UYF9_MOUSE,	-0.5	-0.7	-0.2	29	-0.5	-0.8	-0.3	28	0	-0.3	0.4	57	1	1
Q3UYK8_MOUSE,Q3TPB6_MOUSE,	1.1	0.7	1.4	21	1	0.6	1.4	13	0	-0.5	0.6	34	1	1
Q3TVT6_MOUSE,Q3UYP2_MOUSE,PCYOX_MOUSE,	0.1	-0.3	0.5	14	0.1	-0.3	0.5	16	0	-0.6	0.6	30	1	1
VIAAT_MOUSE,Q49S98_MOUSE,	-0.4	-0.8	0	20	-0.4	-0.8	0	23	0	-0.5	0.5	43	1	1
Q4FJN9_MOUSE,Q5M8R9_MOUSE,FPPS_MOUSE,	1.4	0.9	1.9	9	1.4	0.8	1.9	7	0	-0.7	0.7	16	1	1
Q4FK59_MOUSE,Q5SX58_MOUSE,ENOB_MOUSE,	1.4	1.1	1.8	13	1.4	1	1.8	12	0	-0.5	0.6	25	1	1
Q4FZK2_MOUSE,EF1G_MOUSE,	1.6	1.2	2	12	1.6	1.3	1.9	19	0	-0.5	0.5	31	1	1
RAP1B_MOUSE,Q52L50_MOUSE,	-0.3	-0.7	0.1	13	-0.3	-0.7	0.1	13	0	-0.5	0.5	26	1	1
Q3TV94_MOUSE,Q52PE3_MOUSE,SSRA_MOUSE,	-0.3	-0.9	0.3	5	-0.3	-0.9	0.4	4	0	-0.9	0.9	9	1	1
GNAO_MOUSE,Q543S2_MOUSE,	-1.1	-1.3	-0.9	79	-1.1	-1.3	-1	81	0	-0.2	0.3	160	1	1
HMOX2_MOUSE,Q544R7_MOUSE,Q3U6W4_MOUSE,	0	-0.3	0.4	20	0.1	-0.3	0.4	16	0	-0.5	0.4	36	1	1
RB27B_MOUSE,Q549X4_MOUSE,	0.4	-0.2	1.1	5	0.5	-0.4	1.4	2	0	-1.1	1.1	7	1	1
AT2A2_MOUSE,Q5DTI2_MOUSE,	-0.2	-0.3	0	147	-0.2	-0.3	0	145	0	-0.2	0.2	292	1	1
AT5F1_MOUSE,Q5I0W0_MOUSE,	-1.4	-1.6	-1.2	51	-1.4	-1.6	-1.2	57	0	-0.3	0.3	108	1	1
Q5J7N1_MOUSE,	-0.3	-0.7	0.2	10	-0.2	-0.7	0.2	11	0	-0.6	0.6	21	1	1
Q3TGI6_MOUSE,PIPNA_MOUSE,Q5ND42_MOUSE,Q3UE53_MOUSE,	0.7	0.4	1	21	0.7	0.4	1	21	0	-0.4	0.4	42	1	1
Q5SS83_MOUSE,	-0.2	-0.4	0.1	30	-0.1	-0.4	0.2	29	0	-0.4	0.4	59	1	1
AP2B1_MOUSE,Q5SWR1_MOUSE,	1.6	1.4	1.7	111	1.6	1.4	1.8	119	0	-0.2	0.2	230	1	1
Q80U89_MOUSE,Q5SXR6_MOUSE,CLH_MOUSE,	1.8	1.7	1.9	363	1.8	1.7	2	340	0	-0.2	0.1	703	1	1
Q69ZX9_MOUSE,	-1.2	-1.5	-0.9	20	-1.2	-1.5	-0.9	29	0	-0.4	0.5	49	1	1
Q6P9K9_MOUSE,	-0.7	-1.2	-0.2	12	-0.7	-1.2	-0.2	12	0	-0.6	0.6	24	1	1
A2AFG8_MOUSE,A2AFG7_MOUSE,Q6PGJ3_MOUSE,	-0.8	-1.1	-0.5	39	-0.8	-1.1	-0.5	39	0	-0.4	0.4	78	1	1
Q3UH93_MOUSE,Q6ZQ83_MOUSE,Q68HV1_MOUSE,	-1.1	-2.1	-0.2	4	-1.2	-2.4	-0.1	3	0	-1.4	1.6	7	1	1
Q6ZWR0_MOUSE,RAP2B_MOUSE,	-0.9	-1.5	-0.4	9	-0.9	-1.2	-0.5	14	0	-0.7	0.6	23	1	1
Q70YN3_MOUSE,Q7JD04_MOUSE,A3R454_MUSMC,Q9MD68_MOUSE,Q5GA82_MUSMM,A3E4A9_MOUSE,	-1	-1.4	-0.7	19	-1.1	-1.4	-0.7	24	0	-0.4	0.5	43	1	1
Q71LX8_MOUSE,	1.2	1	1.4	70	1.2	1	1.4	69	0	-0.2	0.2	139	1	1
Q6QN84_MOUSE,Q7JD05_MOUSE,NU2M_MOUSE,Q9MD59_MOUSE,	-1.5	-2	-1	7	-1.5	-2.1	-0.9	6	0	-0.8	0.8	13	1	1
Q7TQH3_MOUSE,	0.2	0	0.4	52	0.2	-0.1	0.4	52	0	-0.3	0.3	104	1	1
Q80TT4_MOUSE,Q8BNI6_MOUSE,Q3TSX8_MOUSE,	-1.3	-1.5	-1.1	64	-1.3	-1.5	-1.2	76	0	-0.2	0.3	140	1	1
Q80U36_MOUSE,	0.9	0.7	1.1	114	0.9	0.7	1	140	0	-0.2	0.2	254	1	1
Q80VM5_MOUSE,	-0.8	-1.1	-0.6	45	-0.9	-1.1	-0.6	38	0	-0.3	0.3	83	1	1
Q8BJL4_MOUSE,LMAN2_MOUSE,	0.1	-0.4	0.6	7	0.1	-0.4	0.6	8	0	-0.7	0.7	15	1	1
Q8BK46_MOUSE,PSMD3_MOUSE,Q3TP95_MOUSE,	1.4	1.1	1.8	15	1.4	1	1.8	15	0	-0.5	0.5	30	1	1
Q8C1W8_MOUSE,NNTM_MOUSE,Q922E1_MOUSE,	-1	-1.3	-0.7	32	-1	-1.3	-0.7	29	0	-0.4	0.4	61	1	1
Q8C4I3_MOUSE,	-1	-1.2	-0.8	51	-1	-1.2	-0.7	58	0	-0.3	0.3	109	1	1
K6PP_MOUSE,Q8C605_MOUSE,	1.4	1.2	1.6	60	1.4	1.2	1.6	61	0	-0.3	0.2	121	1	1
Q8CC13_MOUSE,	1.5	1.3	1.7	75	1.5	1.3	1.7	70	0	-0.3	0.3	145	1	1
Q8CF96_MOUSE,	-0.2	-0.6	0.2	17	-0.2	-0.6	0.2	18	0	-0.5	0.6	35	1	1
Q8CFX3_MOUSE,	-0.3	-0.7	0	18	-0.4	-0.8	0.1	13	0	-0.5	0.6	31	1	1
Q544M1_MOUSE,LY6H_MOUSE,Q8K356_MOUSE,	-0.1	-0.5	0.2	17	-0.1	-0.5	0.3	15	0	-0.5	0.4	32	1	1
Q91V89_MOUSE,Q8K5D8_MOUSE,Q7TNL5_MOUSE,	1.1	0.8	1.4	20	1.1	0.7	1.5	18	0	-0.5	0.5	38	1	1
Q8VDX7_MOUSE,	1.5	1.3	1.7	47	1.5	1.3	1.8	33	0	-0.3	0.3	80	1	1
Q91V55_MOUSE,	1.2	0.6	1.7	6	1.2	0.7	1.7	6	0	-0.7	0.7	12	1	1
Q3U645_MOUSE,Q3UNS0_MOUSE,Q91VT3_MOUSE,	0	-0.6	0.6	7	0	-0.6	0.5	8	0	-0.8	0.8	15	1	1
B7U582_MOUSE,Q99KD7_MOUSE,HSP72_MOUSE,	0	-0.3	0.4	19	0	-0.3	0.3	24	0	-0.4	0.5	43	1	1
Q9DAB3_MOUSE,ARL8B_MOUSE,	0.1	-0.4	0.5	8	0	-0.4	0.4	13	0	-0.6	0.6	21	1	1
Q543Q4_MOUSE,RAB3D_MOUSE,	-0.2	-0.5	0.2	17	-0.2	-0.5	0.2	18	0	-0.5	0.5	35	1	1
RAB9B_MOUSE,Q3KNA5_MOUSE,	0.1	-0.9	1.1	2	0.2	-0.8	1.2	2	0	-1.5	1.4	4	1	1
Q8CCG5_MOUSE,RALB_MOUSE,	-0.3	-0.8	0.2	10	-0.2	-0.8	0.3	9	0	-0.7	0.7	19	1	1
RAP2A_MOUSE,	-0.8	-1.4	-0.2	6	-0.8	-1.2	-0.4	12	0	-0.7	0.7	18	1	1
REEP2_MOUSE,C1IE02_MOUSE,	0.4	-0.1	0.9	5	0.5	-0.1	1	6	0	-0.8	0.7	11	1	1
RHOA_MOUSE,Q4VAE6_MOUSE,	-0.1	-0.5	0.2	17	-0.1	-0.4	0.2	21	0	-0.5	0.4	38	1	1
Q4FJM5_MOUSE,RHOB_MOUSE,	-1.1	-1.5	-0.6	13	-1.1	-1.5	-0.8	14	0	-0.5	0.6	27	1	1
RL13_MOUSE,	0.1	-0.3	0.5	10	0.1	-0.4	0.5	10	0	-0.6	0.6	20	1	1
Q564E8_MOUSE,RL4_MOUSE,	0.5	0.2	0.9	19	0.5	0.2	0.8	22	0	-0.5	0.5	41	1	1
RMND1_MOUSE,	-1.3	-1.7	-0.8	10	-1.3	-1.7	-0.9	10	0	-0.6	0.6	20	1	1
RTN1_MOUSE,Q4FJL2_MOUSE,	0.5	0.2	0.7	40	0.5	0.2	0.7	38	0	-0.4	0.3	78	1	1
RTN4_MOUSE,	0.2	0	0.4	64	0.2	0	0.5	51	0	-0.3	0.3	115	1	1
S2546_MOUSE,	-1.3	-1.6	-1	23	-1.3	-1.5	-1	26	0	-0.4	0.4	49	1	1
S6A11_MOUSE,Q8BWA7_MOUSE,	-1	-1.3	-0.7	21	-1	-1.4	-0.7	18	0	-0.4	0.5	39	1	1
S6A17_MOUSE,	0.2	-0.1	0.5	33	0.2	-0.1	0.5	29	0	-0.4	0.4	62	1	1
Q6PCX2_MOUSE,SC6A1_MOUSE,	-0.7	-1	-0.4	36	-0.7	-1	-0.5	38	0	-0.3	0.4	74	1	1
SCAM5_MOUSE,	0.4	0	0.9	12	0.4	0	0.8	11	0	-0.6	0.6	23	1	1
SCMC1_MOUSE,	-1.1	-2.2	0	3	-1.1	-2	-0.1	3	0	-1.5	1.4	6	1	1
SCMC3_MOUSE,	-1.4	-1.7	-1.1	29	-1.4	-1.7	-1.2	29	0	-0.4	0.4	58	1	1
SEP11_MOUSE,	2.9	2.5	3.3	17	2.9	2.6	3.3	20	0	-0.5	0.5	37	1	1
SEPT2_MOUSE,	1.5	1	2	6	1.4	0.9	1.9	6	0	-0.7	0.7	12	1	1
SEPT5_MOUSE,	1.5	1.2	1.8	21	1.5	1.2	1.8	23	0	-0.4	0.4	44	1	1
SFXN3_MOUSE,	-1.4	-1.6	-1.2	53	-1.4	-1.6	-1.2	57	0	-0.2	0.3	110	1	1
SHAN3_MOUSE,	-0.8	-1.1	-0.4	21	-0.8	-1.1	-0.4	20	0	-0.5	0.5	41	1	1
SHS6L_MOUSE,	0.3	-0.3	0.8	7	0.3	-0.4	1	4	0	-0.9	0.8	11	1	1
SIRT2_MOUSE,	-4.5	-4.8	-4.2	25	-4.5	-4.8	-4.2	24	0	-0.4	0.4	49	1	1
SNAA_MOUSE,	0.6	0.3	1	15	0.6	0.2	1	11	0	-0.5	0.6	26	1	1
SNG1_MOUSE,Q3U6D7_MOUSE,	0.8	0.5	1.2	15	0.8	0.5	1.2	17	0	-0.5	0.5	32	1	1
SPTB2_MOUSE,	1.2	1.1	1.3	185	1.2	1.1	1.4	196	0	-0.2	0.1	381	1	1
STXB1_MOUSE,	1.3	1.1	1.4	193	1.3	1.1	1.4	196	0	-0.2	0.2	389	1	1
SV2A_MOUSE,	0.1	-0.1	0.2	104	0.1	-0.1	0.2	109	0	-0.2	0.2	213	1	1
SV2B_MOUSE,	0.3	0.1	0.5	99	0.2	0.1	0.4	110	0	-0.2	0.3	209	1	1
SYNJ1_MOUSE,	1.8	1.5	2.2	35	1.8	1.5	2.1	31	0	-0.4	0.4	66	1	1
SYT3_MOUSE,	-0.7	-1.6	0.3	2	-0.6	-1.6	0.3	2	0	-1.3	1.3	4	1	1
TBA4A_MOUSE,	0.7	0.6	0.9	211	0.7	0.6	0.9	219	0	-0.2	0.2	430	1	1
TBB3_MOUSE,	0.8	0.7	0.9	187	0.8	0.7	1	184	0	-0.2	0.1	371	1	1
TIM50_MOUSE,	-1.7	-2	-1.4	19	-1.7	-2	-1.4	20	0	-0.4	0.4	39	1	1
TIPRL_MOUSE,	1.9	1.4	2.5	6	2	1.4	2.5	7	0	-0.8	0.8	13	1	1
TM1L2_MOUSE,	0.3	-0.6	1.2	2	0.4	-0.8	1.5	2	0	-1.5	1.4	4	1	1
Q3TFU8_MOUSE,TMED9_MOUSE,Q6PDC2_MOUSE,	0.1	-0.5	0.7	6	0.1	-0.6	0.7	6	0	-0.8	0.9	12	1	1
TMEDA_MOUSE,	0.1	-0.5	0.6	6	0	-0.7	0.7	4	0	-0.8	0.9	10	1	1
Q3UI08_MOUSE,TMM9B_MOUSE,	-0.1	-0.8	0.6	4	-0.1	-0.7	0.5	5	0	-0.9	0.9	9	1	1
VAPA_MOUSE,	0	-0.2	0.3	35	0.1	-0.2	0.3	28	0	-0.3	0.3	63	1	1
VATB2_MOUSE,	0.9	0.6	1.2	25	0.9	0.7	1.2	25	0	-0.4	0.4	50	1	1
VATC1_MOUSE,	1.4	1.2	1.6	38	1.4	1.2	1.7	38	0	-0.3	0.3	76	1	1
VATH_MOUSE,	1	0.8	1.2	54	1	0.8	1.2	56	0	-0.3	0.3	110	1	1
VDAC1_MOUSE,	-1.3	-1.4	-1.1	137	-1.3	-1.5	-1.2	141	0	-0.1	0.2	278	1	1
VGLU1_MOUSE,	0.2	0	0.4	63	0.2	0	0.4	58	0	-0.3	0.3	121	1	1
A2A5S1_MOUSE,XPO2_MOUSE,	0.9	0.6	1.2	28	0.8	0.6	1.1	40	0	-0.3	0.4	68	1	1
XRP2_MOUSE,B1B076_MOUSE,	-1.4	-2.2	-0.6	5	-1.4	-2	-0.8	4	0	-1	1	9	1	1
YKT6_MOUSE,	0.6	0.2	0.9	16	0.6	0.2	1	15	0	-0.5	0.5	31	1	1

## Sheet: BLA-cytosolic fract.
Group	14N shocked/15N reference				14N control/15N reference				14N shocked/14N control
Uniprot ID	log2ratio	lowerCI	upperCI	# of quantified peptides	log2ratio	lowerCI	upperCI	# of quantified peptides	log2ratio	lowerCI	upperCI	# of quantified peptides identified	p-value	adjusted p-value
SPTB2_MOUSE,	-1.4	-1.6	-1.1	61	-0.4	-0.6	-0.1	56	-1	-1.3	-0.7	117	9.6849e-15	8.92e-12
A3KGU5_MOUSE,	-1	-1.1	-0.9	212	-0.6	-0.7	-0.4	231	-0.4	-0.6	-0.3	443	1.4275e-13	6.57e-11
Q80U89_MOUSE,Q5SXR6_MOUSE,CLH_MOUSE,	-1.5	-1.7	-1.2	35	-0.7	-0.9	-0.5	90	-0.7	-1	-0.4	125	4.0064e-08	1.11e-05
Q71LX8_MOUSE,	-1.7	-2	-1.5	33	-0.9	-1.2	-0.7	32	-0.8	-1.2	-0.5	65	4.8045e-08	1.11e-05
Q3UGZ4_MOUSE,Q68FG2_MOUSE,	-1.7	-2	-1.4	31	-0.7	-1.1	-0.4	25	-1	-1.4	-0.6	56	3.3356e-07	6.14e-05
DHX9_MOUSE,	-2.4	-3	-1.9	7	-0.6	-1.1	0	10	-1.8	-2.6	-1.1	17	4.2694e-07	6.55e-05
NSF_MOUSE,	-1.9	-2.1	-1.7	68	-1.4	-1.6	-1.2	73	-0.5	-0.7	-0.2	141	4.0393e-06	0.000503039
DYN1_MOUSE,	-1.9	-2.2	-1.5	26	-1	-1.3	-0.8	39	-0.8	-1.2	-0.4	65	4.3695e-06	0.000503039
A2A9X6_MOUSE,NT5C_MOUSE,	-1.7	-2.5	-0.9	3	0.8	0.2	1.3	6	-2.5	-3.5	-1.5	9	5.4186e-06	0.000554503
TBB2A_MOUSE,	-2.9	-3.1	-2.8	141	-2.6	-2.8	-2.4	121	-0.3	-0.5	-0.1	262	7.09e-06	0.000652989
TBB5_MOUSE,	-3	-3.1	-2.8	135	-2.6	-2.8	-2.5	117	-0.3	-0.5	-0.1	252	1.3451e-05	0.00112622
B2RSN3_MOUSE,TBB2B_MOUSE,	-2.9	-3.1	-2.8	136	-2.6	-2.8	-2.5	117	-0.3	-0.5	-0.1	253	1.6054e-05	0.00123215
VATA_MOUSE,	-0.8	-0.9	-0.6	116	-0.4	-0.6	-0.3	116	-0.4	-0.6	-0.1	232	2.3945e-05	0.00169641
TBB2C_MOUSE,	-3	-3.2	-2.8	134	-2.7	-2.9	-2.5	118	-0.3	-0.5	-0.1	252	7.7016e-05	0.00489383
D2KHZ9_MOUSE,G3P_MOUSE,	0.8	0.7	0.9	267	0.6	0.4	0.7	192	0.2	0.1	0.4	459	7.9704e-05	0.00489383
B2KGT6_MOUSE,	-0.8	-1	-0.6	101	-0.5	-0.6	-0.3	113	-0.3	-0.6	-0.1	214	9.2925e-05	0.00534899
AT1A3_MOUSE,	-1.4	-1.6	-1.2	77	-1.1	-1.3	-0.9	132	-0.3	-0.6	-0.1	209	0.00015132	0.00819798
K6PP_MOUSE,Q8C605_MOUSE,	-3.4	-3.9	-3	23	-2.6	-2.9	-2.3	28	-0.8	-1.3	-0.3	51	0.00018447	0.00943872
TBA4A_MOUSE,	-3.1	-3.3	-3	127	-2.9	-3	-2.7	117	-0.3	-0.5	-0.1	244	0.00028195	0.0136672
K6PF_MOUSE,	-3.5	-3.8	-3.1	22	-2.9	-3.1	-2.6	32	-0.6	-1	-0.2	54	0.00040824	0.0180363
TBB4_MOUSE,	-3.1	-3.3	-2.9	123	-2.8	-3	-2.6	102	-0.3	-0.5	-0.1	225	0.00041125	0.0180363
TBA1C_MOUSE,Q52L87_MOUSE,	-3	-3.1	-2.8	155	-2.7	-2.9	-2.6	146	-0.3	-0.4	-0.1	301	0.00046196	0.0193393
AT1A1_MOUSE,	-1.8	-2	-1.6	58	-1.4	-1.6	-1.3	100	-0.3	-0.6	-0.1	158	0.00091402	0.0366005
TBB3_MOUSE,	-3.1	-3.3	-2.9	101	-2.8	-3	-2.6	82	-0.3	-0.5	-0.1	183	0.0010238	0.0379558
GRAP1_MOUSE,A2AEW9_MOUSE,A2AEW8_MOUSE,	-2.2	-3.3	-1.2	2	0.5	-0.4	1.4	5	-2.8	-4.2	-1.4	7	0.0010519	0.0379558
Q3URJ7_MOUSE,	-0.8	-1	-0.6	70	-0.5	-0.7	-0.3	81	-0.3	-0.6	-0.1	151	0.0010715	0.0379558
KPYM_MOUSE,	1.2	1.1	1.3	330	1.1	0.9	1.2	275	0.1	0	0.3	605	0.0021438	0.0731274
Q91ZE6_MOUSE,Q8VIE5_MOUSE,	-1.4	-2.3	-0.4	3	2.8	2	3.5	2	-4.1	-5.4	-2.9	5	0.0050715	0.166816
RAB14_MOUSE,Q50HX2_MOUSE,Q50HX4_MOUSE,	-0.2	-0.6	0.1	23	0.3	0	0.7	26	-0.6	-1	-0.1	49	0.0053575	0.170147
FSCN1_MOUSE,	1	0.8	1.2	83	0.7	0.5	0.9	86	0.3	0	0.5	169	0.0058718	0.170926
Q546G4_MOUSE,ALBU_MOUSE,	2.3	2.1	2.5	71	2	1.8	2.2	60	0.3	0	0.6	131	0.0058831	0.170926
Q6ZQ49_MOUSE,Q3UHK5_MOUSE,AT1A2_MOUSE,	-1.5	-1.7	-1.3	47	-1.2	-1.4	-1	72	-0.3	-0.6	0	119	0.0059388	0.170926
TENR_MOUSE,A2RT70_MOUSE,	-1.4	-1.6	-1.1	58	-1	-1.3	-0.8	56	-0.3	-0.6	0	114	0.006436	0.178804
SYAC_MOUSE,Q3UD67_MOUSE,	-1.9	-2.2	-1.6	20	-2.6	-2.9	-2.1	17	0.7	0.1	1.2	37	0.0066008	0.178804
CAND1_MOUSE,	-2	-2.4	-1.5	10	-1.2	-1.6	-0.8	14	-0.8	-1.4	-0.2	24	0.0077006	0.202636
Q5SVG4_MOUSE,Q3TXG4_MOUSE,Q3TVN4_MOUSE,Q8CC13_MOUSE,AP1B1_MOUSE,Q5SVG5_MOUSE,	-1.5	-2	-1	13	-0.7	-1.1	-0.3	18	-0.8	-1.4	-0.1	31	0.0093864	0.240135
AP2A1_MOUSE,	-1.5	-1.9	-1.2	23	-1.1	-1.4	-0.8	26	-0.5	-0.9	-0.1	49	0.010112	0.251707
Q3UJH8_MOUSE,	1.1	0.9	1.2	90	0.8	0.6	1	87	0.2	0	0.5	177	0.015183	0.367988
DLDH_MOUSE,	1	0.8	1.2	73	0.8	0.6	1	64	0.3	0	0.5	137	0.019938	0.46872
ALDOA_MOUSE,A6ZI44_MOUSE,Q5FWB7_MOUSE,	0.3	0.2	0.5	130	0.2	0	0.3	124	0.2	0	0.4	254	0.020357	0.46872
AP2B1_MOUSE,Q5SWR1_MOUSE,	-1.3	-1.7	-0.9	20	-0.8	-1.1	-0.5	34	-0.5	-0.9	0	54	0.022334	0.501698
ALDOC_MOUSE,B1AQE0_MOUSE,	0.5	0.3	0.7	104	0.3	0.1	0.5	90	0.2	0	0.4	194	0.025404	0.542587
A2A5A0_MOUSE,A2A5A2_MOUSE,Q6NXX6_MOUSE,A2A5A1_MOUSE,VPP1_MOUSE,	-1.4	-1.9	-1	16	-0.8	-1.3	-0.3	11	-0.6	-1.2	0	27	0.025903	0.542587
NCDN_MOUSE,	-0.6	-1.2	-0.1	8	0.1	-0.4	0.6	12	-0.7	-1.4	0	20	0.026523	0.542587
G6PI_MOUSE,	1.3	1.2	1.5	130	1.1	1	1.3	117	0.2	0	0.4	247	0.026855	0.542587
STXB1_MOUSE,	-1.2	-1.4	-1	79	-1	-1.2	-0.8	100	-0.2	-0.4	0	179	0.027587	0.542587
Q9Z1R9_MOUSE,	6.4	6	6.8	14	6.9	6.6	7	20	-0.5	-0.9	0	34	0.027689	0.542587
MDHM_MOUSE,	0.9	0.8	1.1	150	0.7	0.6	0.9	148	0.2	0	0.4	298	0.028401	0.544944
GLNA_MOUSE,	0.5	0.3	0.7	102	0.3	0.1	0.5	98	0.2	0	0.4	200	0.029826	0.56009
VA0D1_MOUSE,	-1.5	-1.9	-1.1	10	-0.9	-1.4	-0.3	8	-0.7	-1.3	0	18	0.031012	0.56009
KCRB_MOUSE,	0.2	0.1	0.4	243	0.1	0	0.2	243	0.1	0	0.3	486	0.031392	0.56009
VATB2_MOUSE,	-0.8	-1	-0.6	71	-0.5	-0.7	-0.3	65	-0.2	-0.5	0	136	0.031753	0.56009
K2C79_MOUSE,	6.4	6.1	6.8	29	6.8	6.5	7	23	-0.4	-0.8	0	52	0.032231	0.56009
A2ARP8_MOUSE,MAP1A_MOUSE,	-1.2	-1.5	-0.9	42	-0.8	-1.1	-0.6	40	-0.3	-0.7	0	82	0.032878	0.560753
DHE3_MOUSE,	0.7	0.5	0.9	101	0.5	0.3	0.7	105	0.2	0	0.4	206	0.034993	0.584621
SYPH_MOUSE,B1AVA7_MOUSE,	-1.4	-1.9	-1	8	-0.9	-1.3	-0.4	8	-0.6	-1.2	0	16	0.035547	0.584621
GPM6A_MOUSE,Q542P2_MOUSE,Q8R1P3_MOUSE,	-1.2	-1.5	-0.9	16	-0.8	-1.1	-0.5	19	-0.4	-0.8	0	35	0.037548	0.603033
Q8VDX7_MOUSE,K6PL_MOUSE,	-3.2	-3.9	-2.7	7	-2.5	-3	-2.1	13	-0.7	-1.4	0	20	0.037976	0.603033
ENOA_MOUSE,Q5FW97_MOUSE,	-1.2	-1.4	-1.1	144	-1.1	-1.2	-0.9	132	-0.1	-0.3	0	276	0.040166	0.617331
NFL_MOUSE,Q05DD2_MOUSE,	-2.5	-3.2	-1.9	4	-1.8	-2.2	-1.3	8	-0.7	-1.5	0	12	0.040217	0.617331
MMSA_MOUSE,	-1.7	-2.2	-1.3	9	-2.3	-2.7	-1.9	8	0.6	0	1.2	17	0.04559	0.688334
Q3USU5_MOUSE,Q3UYK6_MOUSE,EAA2_MOUSE,A2APL8_MOUSE,	-1.3	-1.6	-1	31	-1	-1.2	-0.7	32	-0.3	-0.7	0	63	0.04692	0.696989
ATPA_MOUSE,	-0.1	-0.2	0.1	95	0.1	-0.1	0.3	98	-0.2	-0.4	0	193	0.049734	0.727064
SCOT1_MOUSE,	0.5	0.2	0.7	51	0.2	0	0.4	50	0.2	-0.1	0.5	101	0.050589	0.728007
Q7M6W1_MOUSE,A3QM89_MOUSE,	-1.3	-2.1	-0.6	3	-0.5	-1	0.1	5	-0.8	-1.7	0.1	8	0.052487	0.739214
Q8C2A3_MOUSE,SEPT7_MOUSE,	-2.3	-2.6	-1.9	23	-1.9	-2.2	-1.6	26	-0.3	-0.7	0.1	49	0.052973	0.739214
BASP1_MOUSE,	1.3	1.1	1.5	123	1.1	1	1.3	123	0.2	-0.1	0.4	246	0.053905	0.740993
AMPH_MOUSE,	-0.6	-0.9	-0.3	25	-0.3	-0.6	0	30	-0.3	-0.7	0.1	55	0.055229	0.748028
C1TC_MOUSE,Q3TW74_MOUSE,Q8R013_MOUSE,	0.3	-0.1	0.6	23	0.7	0.4	1	32	-0.4	-0.9	0.1	55	0.057916	0.768985
TCPG_MOUSE,Q3UJP4_MOUSE,Q3U4U6_MOUSE,	-1.4	-2	-0.9	7	-0.8	-1.3	-0.3	9	-0.7	-1.4	0.1	16	0.059798	0.768985
OXR1_MOUSE,	-1.3	-1.7	-0.9	12	-0.7	-1.2	-0.3	9	-0.5	-1.2	0.1	21	0.060282	0.768985
B2RS41_MOUSE,SSDH_MOUSE,	1.2	0.9	1.4	49	0.9	0.7	1.2	48	0.3	-0.1	0.6	97	0.0606	0.768985
AINX_MOUSE,	-2.3	-3.3	-1.5	4	-1.5	-2	-1.1	10	-0.8	-1.9	0.1	14	0.060951	0.768985
UBP24_MOUSE,	2.1	1.3	3.3	3	3.6	2.8	4.4	2	-1.4	-2.6	0.4	5	0.066437	0.826871
Q6PEM5_MOUSE,AMRP_MOUSE,Q8K295_MOUSE,Q5D0B0_MOUSE,Q3TL96_MOUSE,Q8C252_MOUSE,Q6ZY49_MOUSE,Q52KI7_MOUSE,Q6PB52_MOUSE,	1.4	0.9	2	8	2.1	1.6	2.6	9	-0.7	-1.4	0.1	17	0.068804	0.83422
ACTN1_MOUSE,	-1.3	-1.6	-1.1	51	-1.1	-1.3	-0.9	63	-0.2	-0.5	0.1	114	0.068839	0.83422
PSA1_MOUSE,Q3TS44_MOUSE,	1.4	1.1	1.6	36	1.1	0.9	1.4	38	0.3	-0.1	0.6	74	0.072326	0.865094
Q5PR74_MOUSE,	1.4	1.2	1.6	97	1.2	1	1.4	88	0.2	-0.1	0.4	185	0.075151	0.88736
Q32P04_MOUSE,K2C5_MOUSE,	6.5	6.2	6.8	35	6.9	6.5	7	48	-0.3	-0.7	0.1	83	0.078709	0.91331
TPIS_MOUSE,	1.2	1.1	1.4	152	1.1	0.9	1.3	91	0.1	-0.1	0.3	243	0.079332	0.91331
AMPB_MOUSE,Q3TX27_MOUSE,Q8BMH2_MOUSE,	-2	-3.1	-1.2	4	-1.2	-1.8	-0.7	7	-0.8	-2.1	0.2	11	0.082367	0.934253
CAMKV_MOUSE,	-1.3	-1.8	-0.8	11	-0.9	-1.2	-0.5	14	-0.5	-1	0.1	25	0.08318	0.934253
A2AQ07_MOUSE,	-3	-3.4	-2.7	20	-2.7	-3	-2.3	13	-0.4	-0.9	0.1	33	0.084821	0.941207
B2RTP7_MOUSE,K22E_MOUSE,	5.5	4.7	6.1	22	6.1	5.5	6.7	17	-0.7	-1.6	0.2	39	0.085862	0.941415
CAPS1_MOUSE,	-1.7	-2.6	-1	4	-1	-1.5	-0.4	6	-0.8	-1.9	0.2	10	0.088989	0.950165
Q3U861_MOUSE,Q3UJH5_MOUSE,VATD_MOUSE,	-1.5	-1.9	-1.2	12	-1.2	-1.5	-0.8	13	-0.4	-0.9	0.1	25	0.092903	0.950165
Q3UCU3_MOUSE,Q3U733_MOUSE,LMNA_MOUSE,B3RH24_MOUSE,B3RH23_MOUSE,	-0.7	-1.3	0	9	0	-0.5	0.5	9	-0.7	-1.5	0.2	18	0.093502	0.950165
Q545P0_MOUSE,Q3TV47_MOUSE,Q3TSQ1_MOUSE,AT1B1_MOUSE,	-1.7	-2.1	-1.4	17	-1.4	-1.7	-1	13	-0.4	-0.8	0.1	30	0.093608	0.950165
ERC2_MOUSE,Q5J8K6_MOUSE,Q3UHT7_MOUSE,Q5J8K8_MOUSE,	-0.1	-0.4	0.3	20	0.4	-0.1	0.8	15	-0.4	-1	0.1	35	0.094443	0.950165
Q3V0T8_MOUSE,GGPPS_MOUSE,	1.5	0.7	2.5	5	0.6	-0.1	1.4	7	0.9	-0.2	2.1	12	0.094746	0.950165
LANC2_MOUSE,	-2.1	-2.7	-1.5	9	-1.5	-2	-1.1	13	-0.5	-1.2	0.1	22	0.094983	0.950165
Q5SX53_MOUSE,M2OM_MOUSE,	-0.3	-0.9	0.3	9	0.3	-0.2	0.7	12	-0.6	-1.3	0.2	21	0.095606	0.950165
VAT1L_MOUSE,	0.3	-0.3	0.9	6	0.9	0.5	1.3	11	-0.6	-1.3	0.2	17	0.095945	0.950165
Q8CBB6_MOUSE,A0JLV3_MOUSE,B2RTK3_MOUSE,H2B1P_MOUSE,H2B1M_MOUSE,H2B1F_MOUSE,Q8VEE3_MOUSE,H2B1B_MOUSE,B2RVD5_MOUSE,H2B1H_MOUSE,Q921L4_MOUSE,H2B1C_MOUSE,H2B1K_MOUSE,H2B2B_MOUSE,	-1	-1.7	-0.2	5	-0.3	-0.8	0.3	6	-0.7	-1.7	0.2	11	0.10022	0.965841
Q497P1_MOUSE,STX1A_MOUSE,Q5D0A4_MOUSE,	-1.9	-2.6	-1.2	6	-1.2	-1.8	-0.7	12	-0.7	-1.5	0.2	18	0.10104	0.965841
Q5SVI2_MOUSE,Q5SVI9_MOUSE,Q5SVI3_MOUSE,Q8BL41_MOUSE,Q5SVI0_MOUSE,KCC2B_MOUSE,	-1.2	-2	-0.4	4	-0.4	-1	0.3	6	-0.8	-1.8	0.2	10	0.10177	0.965841
HS12A_MOUSE,	-2.5	-2.9	-2.2	18	-2.2	-2.5	-1.8	19	-0.4	-0.8	0.1	37	0.10316	0.965841
Q3UJW1_MOUSE,Q544B1_MOUSE,ALDH2_MOUSE,Q3TVM2_MOUSE,Q3U9J7_MOUSE,	0	-0.3	0.4	27	0.3	0	0.7	26	-0.3	-0.8	0.1	53	0.10355	0.965841
VDAC1_MOUSE,	0.2	-0.2	0.6	13	0.6	0.2	1	13	-0.4	-1	0.1	26	0.10382	0.965841
GDIA_MOUSE,	1.4	1.2	1.5	184	1.2	1.1	1.4	170	0.1	-0.1	0.3	354	0.10516	0.968524
Q3SYP5_MOUSE,Q3ZAW8_MOUSE,K1C16_MOUSE,Q9EQD6_MOUSE,Q9EQD7_MOUSE,	6.6	6.2	7	34	7	6.7	7	28	-0.3	-0.8	0.1	62	0.10921	0.973979
Q5EBQ2_MOUSE,PEBP1_MOUSE,	1.3	1	1.6	26	1	0.7	1.3	25	0.3	-0.1	0.6	51	0.10965	0.973979
Q91V55_MOUSE,	-1.6	-2.1	-1.1	6	-1.1	-1.5	-0.7	11	-0.5	-1.1	0.2	17	0.11119	0.973979
ECHM_MOUSE,	-4.3	-4.8	-3.7	6	-3.7	-4.2	-3.3	8	-0.5	-1.3	0.2	14	0.11209	0.973979
MARE2_MOUSE,	0.5	-0.1	1.3	8	-0.1	-0.6	0.4	10	0.6	-0.2	1.6	18	0.11312	0.973979
NEB2_MOUSE,	-1.2	-2.1	-0.4	5	-0.4	-1	0.1	9	-0.8	-1.8	0.2	14	0.11351	0.973979
K22O_MOUSE,	6.3	5.8	7	14	7	6.5	7	17	-0.6	-1.1	0.2	31	0.11458	0.973979
CISY_MOUSE,	1	0.8	1.3	66	0.9	0.6	1.1	61	0.2	-0.1	0.5	127	0.11473	0.973979
LA_MOUSE,Q564E6_MOUSE,Q8BTU4_MOUSE,Q3TG93_MOUSE,	-0.9	-1.8	0	5	-0.1	-0.7	0.6	6	-0.9	-2	0.3	11	0.11527	0.973979
OGT1_MOUSE,	-1.1	-2	-0.2	3	0	-1.1	1.1	2	-1.1	-2.5	0.3	5	0.11966	1
KCC2A_MOUSE,Q80TN1_MOUSE,	-1	-1.4	-0.6	12	-0.6	-1	-0.2	14	-0.4	-0.9	0.1	26	0.12474	1
Q91XH5_MOUSE,	0.3	0	0.6	26	0	-0.4	0.4	20	0.3	-0.1	0.8	46	0.12575	1
SNG1_MOUSE,Q3U6D7_MOUSE,	-1.5	-2	-0.9	5	-0.9	-1.5	-0.3	5	-0.6	-1.4	0.2	10	0.12692	1
RAB3C_MOUSE,Q542T7_MOUSE,	0.7	0.1	1.7	13	2	0.7	2.7	13	-1.2	-2.3	0.4	26	0.127	1
TERA_MOUSE,	-1.6	-1.9	-1.4	50	-1.5	-1.7	-1.2	53	-0.2	-0.5	0.1	103	0.12739	1
ENOG_MOUSE,Q545V3_MOUSE,	-1	-1.2	-0.9	104	-0.9	-1.1	-0.7	102	-0.1	-0.4	0.1	206	0.12802	1
Q3UUU4_MOUSE,SEPT6_MOUSE,	-2.5	-2.9	-2.1	11	-2.2	-2.5	-1.8	16	-0.3	-0.8	0.2	27	0.13422	1
SCRN3_MOUSE,	1.5	0.9	2	9	1	0.5	1.5	10	0.5	-0.2	1.2	19	0.13454	1
SNG3_MOUSE,	-0.9	-1.5	-0.3	5	-0.3	-0.9	0.3	4	-0.6	-1.4	0.2	9	0.13708	1
Q3UDJ7_MOUSE,ACTN4_MOUSE,Q3ULT2_MOUSE,	-1.3	-1.6	-1.1	32	-1.1	-1.4	-0.9	39	-0.2	-0.6	0.1	71	0.13713	1
Q545N7_MOUSE,KCRU_MOUSE,	0.9	0.7	1.1	73	0.7	0.5	0.9	68	0.2	-0.1	0.4	141	0.13766	1
CA128_MOUSE,	1.8	1.4	2.3	11	1.2	0.6	1.9	5	0.6	-0.2	1.4	16	0.13799	1
O35619_MOUSE,VAMP2_MOUSE,Q8CHR4_MOUSE,B0QZN5_MOUSE,	-1.4	-2.5	-0.5	2	-0.6	-1.3	0.2	4	-0.9	-2.1	0.3	6	0.13887	1
CH60_MOUSE,	-1.1	-1.3	-0.9	68	-0.9	-1.1	-0.7	66	-0.2	-0.4	0.1	134	0.13984	1
Q3U561_MOUSE,Q5XJF6_MOUSE,	-0.9	-1.5	-0.3	7	-0.4	-0.8	0	11	-0.5	-1.2	0.2	18	0.14012	1
Q8K314_MOUSE,	-2.4	-2.9	-1.9	5	-2	-2.4	-1.5	12	-0.5	-1.1	0.2	17	0.14042	1
A2AFG8_MOUSE,A2AFG7_MOUSE,Q6PGJ3_MOUSE,L1CAM_MOUSE,	0.2	-0.5	1	5	1	0.2	1.9	4	-0.8	-2	0.3	9	0.14109	1
DHPR_MOUSE,	1.2	0.9	1.5	26	1	0.7	1.3	26	0.3	-0.1	0.6	52	0.1416	1
SEP11_MOUSE,	-2	-2.4	-1.7	19	-1.8	-2.1	-1.5	24	-0.3	-0.7	0.1	43	0.14313	1
Q7TSZ6_MOUSE,Q6GTI5_MOUSE,IMB1_MOUSE,Q3TFE8_MOUSE,	-1.8	-2.3	-1.2	6	-1.2	-1.8	-0.7	7	-0.5	-1.3	0.2	13	0.14442	1
PP2BA_MOUSE,B2RRX2_MOUSE,	-0.9	-1.2	-0.7	42	-0.7	-0.9	-0.5	51	-0.2	-0.5	0.1	93	0.14566	1
Q3TII3_MOUSE,Q58E64_MOUSE,EF1A1_MOUSE,Q3UA81_MOUSE,	-2	-2.3	-1.7	32	-1.8	-2	-1.5	38	-0.2	-0.5	0.1	70	0.14656	1
AT5F1_MOUSE,Q5I0W0_MOUSE,	-0.5	-0.9	-0.2	17	-0.2	-0.6	0.2	16	-0.3	-0.8	0.2	33	0.14881	1
A8XUV6_MOUSE,A8XUV0_MOUSE,TCPA1_MOUSE,TCPA2_MOUSE,	-2	-2.8	-1.3	5	-1.3	-2	-0.6	5	-0.7	-1.8	0.3	10	0.14891	1
RTN1_MOUSE,Q4FJL2_MOUSE,	-0.9	-1.7	-0.1	4	-0.3	-0.8	0.2	6	-0.6	-1.6	0.3	10	0.15218	1
Q6DI63_MOUSE,	1.6	1.2	2.1	8	1.1	0.4	1.8	6	0.6	-0.3	1.4	14	0.15399	1
Q3UNQ0_MOUSE,Q3U0U5_MOUSE,CAP1_MOUSE,Q3UVJ2_MOUSE,Q3TC53_MOUSE,Q8BPT7_MOUSE,	-1.6	-2.5	-0.7	5	-0.9	-1.4	-0.5	11	-0.7	-1.7	0.3	16	0.1543	1
B2RUJ0_MOUSE,AAK1_MOUSE,	-1.5	-2.3	-0.8	5	-0.6	-1.8	0.7	2	-1	-2.5	0.5	7	0.15585	1
SEPT5_MOUSE,	-2.2	-2.5	-1.8	14	-1.9	-2.2	-1.6	16	-0.3	-0.7	0.2	30	0.15769	1
Q3UE92_MOUSE,	1	0.6	1.4	16	0.6	0.2	1.1	14	0.4	-0.2	1	30	0.15799	1
NFM_MOUSE,	-1.4	-1.8	-1	10	-1	-1.4	-0.6	12	-0.4	-0.9	0.2	22	0.15869	1
Q8BG33_MOUSE,Q3TYC2_MOUSE,NTRI_MOUSE,	-0.5	-1	0	9	-0.9	-1.3	-0.5	14	0.4	-0.2	1	23	0.16311	1
NFASC_MOUSE,	-1	-1.3	-0.6	20	-0.7	-1	-0.3	18	-0.3	-0.8	0.2	38	0.16658	1
B9EKR1_MOUSE,Q9WUT8_MOUSE,	1	0.7	1.4	24	1.3	1	1.7	27	-0.3	-0.8	0.2	51	0.16722	1
SCRN1_MOUSE,	1.2	0.9	1.5	33	1	0.7	1.2	36	0.2	-0.1	0.6	69	0.16808	1
WDR48_MOUSE,	0.5	-0.2	1.1	7	0	-0.5	0.4	12	0.5	-0.3	1.3	19	0.17491	1
VATH_MOUSE,	-1.8	-2.4	-1.1	4	-1.2	-1.8	-0.6	6	-0.6	-1.4	0.3	10	0.17508	1
Q4FJK0_MOUSE,DECR_MOUSE,	-1.4	-1.9	-0.8	7	-0.9	-1.4	-0.4	7	-0.5	-1.2	0.3	14	0.17549	1
Q8C153_MOUSE,	0.9	0.7	1	98	0.7	0.5	0.9	90	0.1	-0.1	0.4	188	0.17613	1
LYPD5_MOUSE,	3.9	3.4	4.4	6	4.3	3.8	4.9	4	-0.5	-1.2	0.3	10	0.17699	1
Q543B9_MOUSE,Q3TCS0_MOUSE,PPCE_MOUSE,	1.2	0.7	1.6	15	0.9	0.6	1.1	35	0.3	-0.2	0.8	50	0.17901	1
H15_MOUSE,Q1WWK3_MOUSE,Q5T003_MOUSE,	-0.4	-1.3	0.6	4	0.5	-0.5	1.7	4	-0.9	-2.5	0.5	8	0.18237	1
GPDA_MOUSE,	-0.8	-1.1	-0.6	30	-0.6	-0.9	-0.4	33	-0.2	-0.6	0.2	63	0.18355	1
GMPPB_MOUSE,	0.9	0.3	1.4	8	0.4	-0.3	1	8	0.5	-0.3	1.4	16	0.1837	1
EF1A2_MOUSE,	-2.2	-2.4	-1.9	33	-2	-2.2	-1.7	39	-0.2	-0.5	0.1	72	0.18453	1
SAE1_MOUSE,	0.4	-0.2	1.1	8	-0.1	-0.7	0.5	7	0.5	-0.3	1.4	15	0.19023	1
Q8C2Q7_MOUSE,Q811L7_MOUSE,HNRH1_MOUSE,	-0.9	-1.4	-0.4	10	-0.5	-1	0	10	-0.4	-1.1	0.3	20	0.19064	1
Q3TI62_MOUSE,TCPZ_MOUSE,Q52KG9_MOUSE,Q3TI05_MOUSE,Q3TIX8_MOUSE,	-1.1	-1.7	-0.5	7	-0.6	-1.1	-0.1	8	-0.5	-1.3	0.3	15	0.19115	1
RPAP1_MOUSE,	3.7	2.9	4.5	3	4.4	3.7	5	5	-0.7	-1.7	0.4	8	0.19318	1
B2RQQ5_MOUSE,	-0.5	-0.9	-0.1	24	-0.2	-0.5	0.2	23	-0.3	-0.9	0.2	47	0.1936	1
Q9QZ83_MOUSE,	-1.5	-1.7	-1.4	118	-1.4	-1.6	-1.3	129	-0.1	-0.3	0.1	247	0.19497	1
2AAA_MOUSE,	-0.7	-1	-0.4	26	-0.5	-0.8	-0.2	33	-0.2	-0.6	0.2	59	0.19539	1
QOR_MOUSE,	2.5	2.1	2.8	15	2.2	1.8	2.6	15	0.3	-0.2	0.8	30	0.1964	1
PTPA_MOUSE,Q543N6_MOUSE,	-1.7	-2.1	-1.3	10	-1.4	-1.8	-0.9	13	-0.3	-0.9	0.2	23	0.19671	1
Q3V2G5_MOUSE,PTGDS_MOUSE,	1.2	0.7	1.7	8	0.7	0.2	1.3	5	0.4	-0.3	1.2	13	0.19686	1
Q3TY32_MOUSE,Q3TA13_MOUSE,SYNPO_MOUSE,Q3URF1_MOUSE,Q3U336_MOUSE,	-1.7	-2.8	-0.7	2	-0.9	-1.7	-0.1	4	-0.8	-2.3	0.5	6	0.19714	1
PLPP_MOUSE,	-2.6	-3	-2.2	13	-2.3	-2.6	-2	17	-0.3	-0.7	0.2	30	0.20134	1
Q9DBF9_MOUSE,	1.7	1.4	2	26	1.5	1.2	1.7	30	0.2	-0.2	0.6	56	0.20259	1
STX1B_MOUSE,	-1.2	-1.7	-0.7	15	-0.8	-1.3	-0.3	16	-0.4	-1	0.3	31	0.2035	1
K2C6A_MOUSE,	6.7	6.3	7	27	7	6.7	7	21	-0.3	-0.7	0.2	48	0.20413	1
CMC1_MOUSE,	-0.6	-1.1	-0.2	15	-0.3	-0.7	0.1	20	-0.3	-0.9	0.2	35	0.2047	1
RAN_MOUSE,Q3ULW0_MOUSE,	-1.7	-2.1	-1.4	16	-1.5	-1.8	-1.2	18	-0.3	-0.7	0.2	34	0.21304	1
PARK7_MOUSE,A2A813_MOUSE,	1.3	1	1.6	25	1.1	0.7	1.4	18	0.2	-0.2	0.7	43	0.21339	1
SEPT3_MOUSE,	-2	-2.4	-1.6	10	-1.6	-2.1	-1.2	10	-0.4	-1	0.3	20	0.2139	1
WASF1_MOUSE,	-1.5	-2.2	-0.9	4	-1	-1.6	-0.5	5	-0.5	-1.3	0.3	9	0.21565	1
VP26B_MOUSE,	0.3	0	0.7	14	0.1	-0.3	0.4	16	0.3	-0.2	0.8	30	0.21681	1
MYH9_MOUSE,	-2	-2.5	-1.6	11	-1.5	-2.3	-0.8	5	-0.5	-1.4	0.4	16	0.21779	1
PGK1_MOUSE,	1	0.8	1.1	120	0.8	0.7	1	128	0.1	-0.1	0.3	248	0.21963	1
Q571M2_MOUSE,Q3U2G2_MOUSE,	0.6	0.4	0.7	116	0.4	0.3	0.6	97	0.1	-0.1	0.3	213	0.21979	1
Q3UFJ3_MOUSE,ODPA_MOUSE,	1	0.8	1.2	75	0.9	0.7	1.1	74	0.1	-0.1	0.4	149	0.22061	1
NIT2_MOUSE,	1.5	1.1	1.9	13	1.2	0.8	1.6	13	0.3	-0.2	0.8	26	0.22387	1
Q3UAV7_MOUSE,Q8C338_MOUSE,Q5HZJ8_MOUSE,	1.9	1.6	2.2	24	1.7	1.4	1.9	31	0.2	-0.2	0.6	55	0.22518	1
Q3UIJ0_MOUSE,Q3THH8_MOUSE,Q3TET0_MOUSE,Q8C5Q5_MOUSE,TCPH_MOUSE,Q3TIJ7_MOUSE,	-1	-1.8	-0.4	6	-0.6	-1.1	-0.1	10	-0.5	-1.3	0.3	16	0.22995	1
VATE1_MOUSE,	-0.3	-0.6	0	29	-0.1	-0.4	0.2	28	-0.2	-0.6	0.2	57	0.23016	1
B7ZNJ3_MOUSE,CSKI1_MOUSE,	-1	-1.4	-0.6	14	-0.7	-1.1	-0.4	16	-0.3	-0.8	0.2	30	0.23229	1
Q3U3M9_MOUSE,Q3V2N1_MOUSE,CLC6A_MOUSE,	6.3	5.7	7	4	6.9	6.3	7	4	-0.4	-1.1	0.3	8	0.23294	1
Q9DBG2_MOUSE,Q7TMF4_MOUSE,PCCB_MOUSE,A0PJE6_MOUSE,	1.2	0.7	1.6	15	0.8	0.4	1.3	13	0.3	-0.3	0.9	28	0.23338	1
Q543F6_MOUSE,CDK5_MOUSE,	-2.6	-3.2	-2	7	-2.2	-2.7	-1.7	6	-0.4	-1.2	0.3	13	0.23402	1
A2AS97_MOUSE,A2AS98_MOUSE,NCKP1_MOUSE,A1L0U6_MOUSE,	-1.5	-1.9	-1.1	14	-1.3	-1.6	-0.9	19	-0.3	-0.8	0.2	33	0.23486	1
AKCL2_MOUSE,	1.7	1.2	2.2	8	1.3	0.7	1.8	6	0.4	-0.3	1.1	14	0.2385	1
RL18_MOUSE,Q642K1_MOUSE,Q58EW0_MOUSE,	-1.5	-1.9	-1.1	13	-1.2	-1.6	-0.7	8	-0.3	-0.9	0.3	21	0.23851	1
DLG1_MOUSE,Q3UP61_MOUSE,	-1.1	-2.1	-0.1	2	-0.4	-1.1	0.3	4	-0.7	-1.9	0.5	6	0.23939	1
Q71RH5_MUSMC,Q71RH6_MUSMM,GUAD_MOUSE,Q69ZN0_MOUSE,Q548F2_MOUSE,	1.8	1.6	2	84	1.7	1.5	1.8	79	0.1	-0.1	0.4	163	0.23966	1
GDIR1_MOUSE,	-1.8	-2.1	-1.5	21	-1.6	-1.9	-1.3	19	-0.2	-0.6	0.2	40	0.2406	1
ARC1A_MOUSE,	0.3	-0.1	0.7	16	0	-0.3	0.4	19	0.3	-0.2	0.7	35	0.24338	1
K2C73_MOUSE,	6.7	6.3	7	28	7	6.6	7	25	-0.2	-0.6	0.2	53	0.24455	1
A2AEX8_MOUSE,FHL1_MOUSE,A2AEX6_MOUSE,A2AEY3_MOUSE,	2.1	1.5	2.8	7	1.7	1.3	2.2	15	0.4	-0.3	1.2	22	0.24484	1
A2RS22_MOUSE,COR1B_MOUSE,	-3.1	-3.9	-2.3	3	-2.6	-3.1	-2	5	-0.5	-1.5	0.4	8	0.24656	1
Q58EV4_MOUSE,Q9DCD8_MOUSE,PSA3_MOUSE,	1.3	0.9	1.6	20	1	0.6	1.4	15	0.3	-0.2	0.7	35	0.24666	1
Q3TTX0_MOUSE,Q6ZQ61_MOUSE,MATR3_MOUSE,Q5BL18_MOUSE,Q4FJT0_MOUSE,	-1.8	-2.3	-1.3	12	-1.5	-1.9	-1	10	-0.3	-1	0.3	22	0.24689	1
Q3U7Z6_MOUSE,PGAM1_MOUSE,	-1.8	-2	-1.6	65	-1.6	-1.8	-1.4	58	-0.1	-0.4	0.1	123	0.24709	1
BLVRB_MOUSE,Q3U6G1_MOUSE,	1.3	0.8	1.8	10	0.9	0.3	1.5	6	0.4	-0.3	1.1	16	0.24803	1
Q3UBU0_MOUSE,	-1.5	-2	-1	10	-1.1	-1.5	-0.8	18	-0.3	-0.9	0.3	28	0.24985	1
MAAI_MOUSE,	0	-0.5	0.6	7	-0.4	-1.1	0.3	4	0.5	-0.4	1.3	11	0.25001	1
CYFP2_MOUSE,	-1.4	-1.7	-1.1	28	-1.2	-1.5	-0.9	27	-0.2	-0.6	0.2	55	0.25006	1
PGM2L_MOUSE,	-1.5	-2.4	-0.8	5	-1.1	-1.6	-0.5	11	-0.5	-1.5	0.4	16	0.25111	1
A5XDA7_MOUSE,ROCK2_MOUSE,	-1.3	-1.9	-0.7	7	-0.8	-1.4	-0.2	8	-0.5	-1.3	0.4	15	0.25317	1
BACH_MOUSE,	1	0.7	1.2	43	0.8	0.5	1.1	40	0.2	-0.2	0.6	83	0.25858	1
1433F_MOUSE,	-0.2	-0.4	0	60	-0.3	-0.5	-0.1	62	0.1	-0.1	0.4	122	0.25952	1
Q5EBG5_MOUSE,Q6P1A9_MOUSE,Q58ET1_MOUSE,Q80UT7_MOUSE,RL7A_MOUSE,	-1.5	-1.9	-1.1	13	-1.2	-1.5	-0.9	21	-0.3	-0.8	0.2	34	0.25975	1
ODO2_MOUSE,	-0.1	-0.4	0.3	22	-0.3	-0.6	0	23	0.2	-0.2	0.7	45	0.26224	1
Q99KD7_MOUSE,	0.2	-0.1	0.4	52	0.3	0.1	0.5	64	-0.1	-0.4	0.2	116	0.26506	1
PRDX3_MOUSE,	0.5	0.2	0.8	28	0.3	0	0.6	23	0.2	-0.2	0.6	51	0.26621	1
HS74L_MOUSE,	-1.7	-2	-1.4	50	-1.9	-2.1	-1.7	55	0.2	-0.2	0.5	105	0.26896	1
ODPB_MOUSE,	1	0.8	1.2	67	0.9	0.7	1.1	53	0.1	-0.1	0.4	120	0.2696	1
Q3TWS4_MOUSE,AP180_MOUSE,Q3UI39_MOUSE,	-0.8	-1.2	-0.5	20	-0.6	-0.9	-0.3	22	-0.2	-0.7	0.2	42	0.26991	1
CYFP1_MOUSE,	-1.4	-1.8	-1	16	-1.2	-1.5	-0.8	17	-0.3	-0.8	0.2	33	0.27031	1
GSTM5_MOUSE,	0.9	0.6	1.1	38	0.7	0.5	1	31	0.2	-0.2	0.5	69	0.27467	1
TBAL3_MOUSE,B9EJS3_MOUSE,	-3.2	-3.6	-2.7	9	-2.9	-3.3	-2.5	13	-0.3	-0.8	0.3	22	0.27782	1
SAE2_MOUSE,A2BH28_MOUSE,	0.5	-0.1	1.1	9	0.1	-0.5	0.6	7	0.4	-0.4	1.3	16	0.27806	1
BIN1_MOUSE,	-0.7	-1	-0.3	20	-0.4	-0.8	-0.1	22	-0.2	-0.7	0.2	42	0.27858	1
ARPC3_MOUSE,	-0.5	-1.4	0.6	3	0.1	-0.4	0.6	8	-0.6	-1.6	0.6	11	0.27922	1
A2A9F5_MOUSE,NUDC_MOUSE,	-1.3	-2.1	-0.5	3	-0.7	-1.4	0	3	-0.6	-1.6	0.5	6	0.27965	1
GPDM_MOUSE,	-0.5	-1.4	0.5	4	0.3	-0.7	1.1	4	-0.7	-1.9	0.7	8	0.28087	1
HYOU1_MOUSE,	-2.1	-2.9	-1.3	5	-1.5	-2.4	-0.7	6	-0.6	-1.8	0.6	11	0.28209	1
BLMH_MOUSE,	1.2	0.8	1.7	14	0.9	0.5	1.4	16	0.3	-0.3	0.9	30	0.28372	1
CAH2_MOUSE,	1.4	1.2	1.6	64	1.3	1.1	1.5	57	0.1	-0.1	0.4	121	0.28382	1
CF211_MOUSE,	1.3	0.5	2.1	4	0.7	-0.1	1.5	3	0.6	-0.5	1.7	7	0.28409	1
GSTM1_MOUSE,	1.3	1.1	1.4	86	1.2	1	1.4	61	0.1	-0.1	0.3	147	0.28431	1
NT5D3_MOUSE,	1.4	0.8	1.9	11	1	0.6	1.5	18	0.3	-0.3	1	29	0.28745	1
Q3TXK9_MOUSE,Q3UB84_MOUSE,Q3U9R7_MOUSE,GSHR_MOUSE,	1.5	1	2	9	1.1	0.7	1.6	9	0.3	-0.3	1	18	0.28859	1
Q543N3_MOUSE,LASP1_MOUSE,	-0.1	-0.4	0.2	26	0.1	-0.2	0.4	24	-0.2	-0.6	0.2	50	0.29395	1
SRR_MOUSE,	-1.7	-2.2	-1.1	6	-1.4	-1.8	-0.9	10	-0.3	-1	0.3	16	0.29577	1
WDR82_MOUSE,B2RXQ8_MOUSE,	1.2	0.4	2	4	0.6	-0.2	1.5	4	0.6	-0.6	1.7	8	0.29964	1
Q3UGM5_MOUSE,MOBL3_MOUSE,	0.1	-0.6	0.9	5	-0.5	-1.5	0.5	3	0.6	-0.6	1.9	8	0.30007	1
Q3TEG0_MOUSE,	-0.8	-1.2	-0.4	12	-1.4	-2.6	-0.3	5	0.6	-0.5	1.9	17	0.30078	1
ACON_MOUSE,	0.7	0.6	0.8	252	0.6	0.5	0.8	213	0.1	-0.1	0.2	465	0.30171	1
Q0PD63_MOUSE,RAB3A_MOUSE,	-0.2	-0.5	0.1	30	0	-0.3	0.3	27	-0.2	-0.6	0.2	57	0.30206	1
VPS35_MOUSE,Q3TRJ1_MOUSE,	0	-0.2	0.3	51	-0.1	-0.3	0.1	51	0.2	-0.2	0.5	102	0.30369	1
CTBP1_MOUSE,	-0.2	-0.8	0.4	13	0.1	-0.3	0.6	15	-0.4	-1.1	0.4	28	0.304	1
Q53YX2_MOUSE,THY1_MOUSE,	1.3	1.1	1.5	44	1.1	0.9	1.4	38	0.1	-0.2	0.5	82	0.30456	1
Q3UYM8_MOUSE,MYPR_MOUSE,	0.4	0.1	0.7	25	0.3	0	0.5	32	0.2	-0.2	0.6	57	0.3064	1
DDAH2_MOUSE,	-0.2	-1.1	0.6	4	-0.7	-1.3	-0.1	6	0.5	-0.6	1.5	10	0.30741	1
SYWC_MOUSE,Q4FJZ4_MOUSE,Q3UDG2_MOUSE,Q3U6U7_MOUSE,	-1.2	-1.9	-0.5	5	-1.7	-2.2	-1.1	6	0.4	-0.5	1.3	11	0.30791	1
Q3TWG2_MOUSE,Q3U518_MOUSE,GLU2B_MOUSE,	-0.5	-1.3	0.3	5	0	-0.7	0.6	5	-0.5	-1.5	0.5	10	0.30851	1
Q80X68_MOUSE,Q9DAM4_MOUSE,	1.2	0.8	1.5	26	1	0.6	1.3	23	0.2	-0.2	0.7	49	0.31212	1
GRIN1_MOUSE,	0.3	-0.2	0.9	10	-0.2	-1.1	0.7	6	0.5	-0.6	1.5	16	0.31301	1
ACY2_MOUSE,B2KFD4_MOUSE,	0.7	0.2	1.2	7	0.4	-0.1	0.9	9	0.3	-0.4	1	16	0.31354	1
HS105_MOUSE,	0.5	0.3	0.7	90	0.4	0.2	0.6	73	0.1	-0.1	0.3	163	0.31615	1
Q542V3_MOUSE,A2A837_MOUSE,	0.9	0.5	1.4	8	0.6	0.2	1.1	7	0.3	-0.4	1	15	0.31792	1
VDAC2_MOUSE,	0.1	-0.7	0.9	4	0.5	0	1	8	-0.4	-1.4	0.5	12	0.32052	1
SAHH2_MOUSE,	-1.1	-1.5	-0.7	15	-0.9	-1.2	-0.6	26	-0.2	-0.7	0.3	41	0.32112	1
MYPT1_MOUSE,	-0.1	-0.6	0.4	9	0.2	-0.3	0.6	13	-0.3	-0.9	0.3	22	0.32182	1
3HIDH_MOUSE,	1.4	1	1.8	21	1.2	0.9	1.5	22	0.2	-0.3	0.7	43	0.32198	1
Q5SX58_MOUSE,Q4FK59_MOUSE,ENOB_MOUSE,	-1.1	-1.3	-0.9	45	-1	-1.2	-0.7	39	-0.1	-0.5	0.2	84	0.32339	1
ATPB_MOUSE,	0.3	0.1	0.4	118	0.4	0.2	0.5	123	-0.1	-0.3	0.1	241	0.3245	1
SAHH3_MOUSE,	-0.8	-1.2	-0.4	16	-0.6	-0.9	-0.2	24	-0.2	-0.8	0.3	40	0.32462	1
PSA6_MOUSE,	1.3	1	1.6	29	1.2	0.9	1.4	28	0.2	-0.2	0.5	57	0.32499	1
ACTBL_MOUSE,	-1.6	-1.8	-1.4	55	-1.5	-1.7	-1.3	63	-0.1	-0.4	0.2	118	0.32682	1
Q6ZQ54_MOUSE,	-0.7	-1.1	-0.4	20	-0.5	-0.9	-0.2	18	-0.2	-0.7	0.3	38	0.32686	1
Q3TYL3_MOUSE,Q6DFY2_MOUSE,	-0.9	-1.6	0	4	-0.4	-1	0.2	8	-0.4	-1.4	0.6	12	0.32913	1
RAB10_MOUSE,Q4FJL0_MOUSE,	-0.3	-0.9	0.3	5	0	-0.5	0.6	7	-0.4	-1.1	0.4	12	0.32985	1
B1AT92_MOUSE,GRB2_MOUSE,Q3U5I5_MOUSE,Q3U1Q4_MOUSE,	0.9	0.4	1.4	8	1.2	0.7	1.6	10	-0.3	-1	0.4	18	0.33017	1
SCAM1_MOUSE,Q3TD71_MOUSE,	-0.8	-1.8	0.1	2	-0.3	-1.1	0.5	3	-0.6	-1.8	0.6	5	0.33169	1
Q542X7_MOUSE,TCPB_MOUSE,	-1.7	-2.3	-1.2	6	-1.4	-1.9	-0.9	11	-0.3	-1.1	0.4	17	0.33557	1
VATC1_MOUSE,	-1.3	-1.7	-0.9	11	-1	-1.5	-0.6	11	-0.3	-0.9	0.3	22	0.33633	1
TM1L2_MOUSE,	-1.2	-2.3	-0.1	2	-0.5	-1.5	0.5	3	-0.7	-2.2	0.8	5	0.33705	1
Q9CZI7_MOUSE,ANXA2_MOUSE,Q542G9_MOUSE,Q3UCD3_MOUSE,	-0.8	-1.9	0.2	2	-0.2	-1.1	0.7	2	-0.6	-2	0.7	4	0.3377	1
Q540D7_MOUSE,AK1A1_MOUSE,	1.5	1.2	1.7	30	1.3	1	1.6	25	0.2	-0.2	0.5	55	0.33845	1
THIL_MOUSE,	0.5	0.3	0.8	53	0.4	0.2	0.6	51	0.1	-0.2	0.4	104	0.33995	1
Q8VC68_MOUSE,Q4U256_MOUSE,	-1.2	-1.7	-0.7	11	-0.9	-1.3	-0.6	21	-0.3	-0.9	0.3	32	0.34414	1
SYIM_MOUSE,	-2.4	-2.9	-1.9	11	-2.1	-2.5	-1.7	19	-0.3	-0.9	0.4	30	0.34425	1
SH3G2_MOUSE,A2ALV3_MOUSE,	-0.3	-0.6	0	26	-0.1	-0.4	0.1	39	-0.2	-0.5	0.2	65	0.3483	1
Q3TYD5_MOUSE,SPRL1_MOUSE,	-0.3	-0.8	0.2	10	0	-0.6	0.6	5	-0.3	-1.1	0.4	15	0.34896	1
RAB5B_MOUSE,Q0PD56_MOUSE,B2RPS1_MOUSE,	-0.8	-1.2	-0.3	11	-0.5	-1	0.1	8	-0.3	-1	0.4	19	0.34963	1
B2RRE2_MOUSE,MY18A_MOUSE,	-2	-2.8	-1.3	7	-1.5	-2.4	-0.8	5	-0.5	-1.7	0.8	12	0.34965	1
STUB1_MOUSE,Q3TYJ0_MOUSE,	0.2	-0.6	1	3	0.7	-0.2	1.6	4	-0.5	-1.7	0.6	7	0.35049	1
RAB5C_MOUSE,Q3TJ39_MOUSE,	-0.7	-1.1	-0.3	13	-0.4	-0.9	0.1	10	-0.3	-0.8	0.3	23	0.35395	1
KAP3_MOUSE,	-1.5	-2.5	-0.3	3	-0.9	-1.6	-0.1	5	-0.6	-1.9	0.8	8	0.35436	1
MGLL_MOUSE,Q3UFX6_MOUSE,	-2	-2.8	-1.3	3	-1.6	-2.3	-0.8	3	-0.5	-1.5	0.6	6	0.35497	1
A2AQL6_MOUSE,PSB7_MOUSE,Q5D098_MOUSE,	1	0.6	1.5	10	1.3	0.9	1.7	14	-0.2	-0.8	0.3	24	0.35551	1
Q5SVF7_MOUSE,NIPS1_MOUSE,	0.9	0.6	1.2	27	0.7	0.4	1.1	21	0.2	-0.2	0.6	48	0.3557	1
Q5DTJ4_MOUSE,BAT2_MOUSE,	0.2	-0.4	0.8	9	-0.4	-1.3	0.8	3	0.6	-0.7	1.6	12	0.35707	1
SBP1_MOUSE,	1.3	0.6	2	7	1.7	1	2.2	10	-0.4	-1.3	0.5	17	0.35974	1
Q3TPT3_MOUSE,SYT1_MOUSE,	-1.5	-2.2	-1	15	-1.3	-1.6	-0.9	24	-0.3	-1	0.4	39	0.36422	1
CRYM_MOUSE,Q3UPX0_MOUSE,	2.6	2.3	2.9	36	2.5	2.2	2.7	39	0.1	-0.2	0.5	75	0.36537	1
CEND_MOUSE,	-0.9	-1.4	-0.3	5	-0.6	-1.1	0	5	-0.3	-1.1	0.4	10	0.36875	1
NALP3_MOUSE,	1.7	0.7	2.6	2	2.2	1.5	2.9	3	-0.5	-1.7	0.7	5	0.37009	1
Q3TCA7_MOUSE,Q3U311_MOUSE,	0.7	-0.1	1.4	4	1.1	0.4	1.9	7	-0.5	-1.6	0.6	11	0.37033	1
LHPP_MOUSE,	1.1	0.4	1.8	3	1.6	0.7	2.4	3	-0.5	-1.5	0.6	6	0.37036	1
Q3U3C4_MOUSE,Q3TJB4_MOUSE,SH3G1_MOUSE,Q3TRJ7_MOUSE,	-0.5	-1.1	0	6	-0.2	-0.7	0.3	9	-0.3	-1	0.4	15	0.37098	1
BCAT1_MOUSE,Q9CXX6_MOUSE,B2KFA1_MOUSE,Q3TKJ1_MOUSE,B2KFA0_MOUSE,Q3TJN1_MOUSE,Q8CBC8_MOUSE,	1.4	0.9	1.8	9	1.1	0.6	1.6	9	0.3	-0.4	0.9	18	0.373	1
Q6GTD3_MOUSE,NDUA9_MOUSE,	-0.5	-1.2	0.3	5	0	-0.7	0.7	7	-0.5	-1.5	0.6	12	0.37422	1
HEXB_MOUSE,Q3TXR9_MOUSE,	0.5	-0.1	1.2	8	0.8	0.4	1.3	15	-0.3	-1.1	0.5	23	0.37625	1
LIN7C_MOUSE,Q3UX93_MOUSE,Q3TTY6_MOUSE,A2ARI2_MOUSE,	0.5	-0.1	1	7	0.2	-0.4	0.7	8	0.3	-0.4	1.1	15	0.3795	1
Q544M1_MOUSE,LY6H_MOUSE,Q8K356_MOUSE,	1.9	1.1	2.8	3	1.4	0.6	2.2	2	0.5	-0.7	1.8	5	0.38291	1
Q8CHG1_MOUSE,DCLK1_MOUSE,A3KN70_MOUSE,	-1.5	-2.1	-1	7	-1.3	-1.8	-0.8	8	-0.3	-1	0.4	15	0.38478	1
Q3U041_MOUSE,Q3UQN3_MOUSE,Q3TUA4_MOUSE,RD23B_MOUSE,	0.1	-0.8	1	5	0.5	0	0.9	13	-0.4	-1.4	0.6	18	0.38526	1
GMPR1_MOUSE,	1.8	1.4	2.3	12	1.6	1.1	2	11	0.2	-0.4	0.8	23	0.38582	1
ES1_MOUSE,	1.1	0.8	1.3	31	0.9	0.7	1.2	26	0.1	-0.2	0.5	57	0.38783	1
Q9DC07_MOUSE,	0	-0.4	0.4	14	0.2	-0.2	0.6	11	-0.2	-0.8	0.3	25	0.38809	1
ECHA_MOUSE,	-2.5	-3	-2.1	13	-2.2	-2.9	-1.6	8	-0.4	-1.1	0.6	21	0.3887	1
HAP28_MOUSE,B2RTB0_MOUSE,	0.9	0.3	1.5	6	0.5	-0.2	1.3	4	0.4	-0.5	1.3	10	0.38888	1
Q3TF40_MOUSE,Q4FK11_MOUSE,Q3TTV7_MOUSE,Q3TMM5_MOUSE,NONO_MOUSE,Q3UM20_MOUSE,Q3TFC2_MOUSE,	0.2	-0.7	1.2	3	-0.2	-0.7	0.3	7	0.4	-0.6	1.5	10	0.3914	1
LONM_MOUSE,	-2	-2.9	-1.1	6	-1.6	-2.2	-1	7	-0.4	-1.5	0.6	13	0.39219	1
MDHC_MOUSE,	0.7	0.5	0.9	72	0.6	0.4	0.9	64	0.1	-0.2	0.4	136	0.39232	1
NCAM1_MOUSE,	-0.5	-0.8	-0.3	47	-0.4	-0.7	-0.2	40	-0.1	-0.5	0.2	87	0.39553	1
Q3UN66_MOUSE,KPCG_MOUSE,	-0.6	-1.2	0	7	-0.3	-0.7	0.1	15	-0.3	-1	0.4	22	0.4003	1
PA1B2_MOUSE,	0.2	-0.2	0.7	11	0	-0.5	0.4	10	0.3	-0.4	0.9	21	0.40171	1
Q542X2_MOUSE,GMPR2_MOUSE,	1.8	1.2	2.5	6	1.5	0.9	2.1	6	0.3	-0.5	1.2	12	0.4058	1
Q3TT94_MOUSE,Q571J7_MOUSE,2ABA_MOUSE,Q3TPC5_MOUSE,Q9CWU3_MOUSE,	-0.8	-1.2	-0.4	11	-0.6	-0.9	-0.2	14	-0.2	-0.8	0.3	25	0.4073	1
B1AWX7_MOUSE,AL1B1_MOUSE,	0.7	0.1	1.3	6	1	0.4	1.5	7	-0.3	-1.1	0.5	13	0.4087	1
PACS2_MOUSE,	2.2	1.7	2.7	7	2.5	1.9	3.2	3	-0.3	-1.1	0.5	10	0.41083	1
CRIP2_MOUSE,Q4FJU3_MOUSE,	-0.4	-0.8	0.1	9	-0.2	-0.6	0.3	9	-0.2	-0.9	0.4	18	0.41228	1
CENPV_MOUSE,	-1.7	-2.2	-1.3	8	-1.5	-1.9	-1.1	10	-0.2	-0.8	0.4	18	0.41243	1
Q3UL78_MOUSE,	-1.2	-1.8	-0.6	5	-0.9	-1.5	-0.3	5	-0.3	-1.1	0.5	10	0.4127	1
GABT_MOUSE,	1.1	0.9	1.3	66	1	0.8	1.2	62	0.1	-0.2	0.3	128	0.41408	1
Q3ULL9_MOUSE,	-0.5	-1.7	0.7	2	-1.1	-1.8	-0.3	4	0.6	-0.9	2	6	0.41416	1
PSB3_MOUSE,Q545G0_MOUSE,	1.2	0.9	1.6	21	1.1	0.7	1.4	18	0.2	-0.3	0.6	39	0.41428	1
Q3UGE3_MOUSE,Q66JR7_MOUSE,Q7TNU0_MOUSE,Q5RJV4_MOUSE,	0.2	-0.1	0.5	31	0.1	-0.2	0.4	31	0.1	-0.2	0.5	62	0.41481	1
PSB1_MOUSE,Q6RI64_MOUSE,	1.3	1	1.6	24	1.1	0.8	1.4	31	0.2	-0.2	0.5	55	0.41647	1
GSTM7_MOUSE,	1.3	1	1.6	22	1.1	0.8	1.5	16	0.2	-0.3	0.6	38	0.41782	1
HDHD2_MOUSE,	1.1	0.8	1.4	21	0.9	0.6	1.3	17	0.2	-0.3	0.6	38	0.41947	1
OTUB1_MOUSE,	-1.2	-1.8	-0.5	5	-0.9	-1.4	-0.4	7	-0.3	-1.1	0.5	12	0.4245	1
MTAP_MOUSE,A2ANM4_MOUSE,	1.1	0.5	1.6	8	0.8	0.3	1.3	10	0.3	-0.4	1	18	0.42645	1
SERA_MOUSE,	-0.6	-1.3	0.1	6	-0.2	-0.8	0.4	7	-0.4	-1.3	0.6	13	0.42774	1
KAPCA_MOUSE,	-2.4	-3	-1.9	5	-2.2	-2.6	-1.8	9	-0.3	-0.9	0.4	14	0.42816	1
AATM_MOUSE,	0.8	0.7	1	118	0.8	0.6	0.9	110	0.1	-0.1	0.3	228	0.42938	1
Q6XBG2_MOUSE,	-3.5	-4.3	-2.8	3	-3.2	-3.8	-2.5	3	-0.4	-1.4	0.6	6	0.43216	1
Q497E9_MOUSE,RS8_MOUSE,	-2.1	-2.8	-1.5	5	-1.8	-2.3	-1.4	9	-0.3	-1.1	0.5	14	0.43382	1
A0JNY3_MOUSE,	-1.7	-2.4	-1	3	-1.4	-2	-0.7	5	-0.4	-1.3	0.6	8	0.4339	1
PDXK_MOUSE,	1.5	1.3	1.7	41	1.4	1.2	1.6	47	0.1	-0.2	0.4	88	0.43455	1
Q8CE68_MOUSE,	1.4	0.5	2.3	3	1	0.3	1.6	4	0.4	-0.7	1.6	7	0.43458	1
1433G_MOUSE,A8IP69_MOUSE,	0.1	-0.1	0.2	107	0	-0.2	0.2	88	0.1	-0.2	0.3	195	0.43565	1
RB11A_MOUSE,Q0PD45_MOUSE,RB11B_MOUSE,Q78ZJ8_MOUSE,	-0.8	-1.3	-0.2	6	-0.5	-1	0.1	5	-0.3	-1.1	0.5	11	0.43591	1
ADPRH_MOUSE,Q3U5N4_MOUSE,	-2.7	-3.5	-1.9	3	-2.3	-3	-1.6	3	-0.4	-1.4	0.7	6	0.43619	1
PURA_MOUSE,Q8C6E9_MOUSE,	-1	-1.5	-0.4	7	-0.7	-1.2	-0.2	9	-0.3	-0.9	0.4	16	0.43645	1
Q3V1Y3_MOUSE,CACP_MOUSE,	1.6	1	2.1	9	1.3	0.9	1.8	10	0.2	-0.4	0.9	19	0.43788	1
LSAMP_MOUSE,Q3TYE5_MOUSE,	1.4	1.1	1.8	15	1.2	0.8	1.7	12	0.2	-0.3	0.7	27	0.4384	1
PPIB_MOUSE,Q9DCY1_MOUSE,	1.7	0.8	2.5	4	1.3	0.9	1.8	9	0.4	-0.6	1.3	13	0.44154	1
A2RS23_MOUSE,PEPD_MOUSE,	0.6	-0.1	1.4	5	1	0.4	1.5	6	-0.3	-1.2	0.6	11	0.44216	1
CALB1_MOUSE,A2AS59_MOUSE,	1.9	1.5	2.2	29	1.7	1.4	2	27	0.2	-0.3	0.6	56	0.4425	1
NFH_MOUSE,Q80TQ3_MOUSE,	-2.6	-3.4	-1.9	7	-2.1	-3.2	-1.1	3	-0.5	-1.8	0.8	10	0.44287	1
Q6A0D0_MOUSE,Q6GT24_MOUSE,	0.8	0.5	1	50	0.7	0.4	0.9	41	0.1	-0.2	0.4	91	0.44319	1
SETD7_MOUSE,	-0.8	-1.8	0.3	2	-1.2	-1.9	-0.6	5	0.5	-0.8	1.7	7	0.44342	1
Q3TLX1_MOUSE,NAMPT_MOUSE,	0.6	-0.2	1.4	4	1	0.4	1.5	8	-0.4	-1.3	0.6	12	0.44564	1
Q14C38_MOUSE,TCAL5_MOUSE,	1.3	0.8	1.7	10	1	0.5	1.5	8	0.3	-0.4	0.9	18	0.44592	1
Q4VAA1_MOUSE,Q3UCX7_MOUSE,RAB5A_MOUSE,	-0.9	-1.3	-0.5	13	-0.7	-1.2	-0.2	8	-0.2	-0.8	0.4	21	0.44694	1
Q3U232_MOUSE,Q3U1N0_MOUSE,COR1A_MOUSE,	-2.2	-2.5	-1.9	17	-2	-2.3	-1.8	24	-0.2	-0.6	0.3	41	0.4474	1
FAHD2_MOUSE,	0.5	0	1	10	0.8	0.3	1.3	9	-0.3	-1	0.5	19	0.44807	1
TALDO_MOUSE,	1.1	0.8	1.4	20	1	0.7	1.3	26	0.1	-0.3	0.6	46	0.4493	1
EPDR1_MOUSE,	0.3	-0.1	0.8	11	0.1	-0.2	0.5	14	0.2	-0.4	0.8	25	0.45023	1
Q499F4_MOUSE,	1.1	0.8	1.4	21	1	0.7	1.3	30	0.1	-0.3	0.6	51	0.45291	1
Q9CX86_MOUSE,	-0.8	-1.3	-0.3	8	-0.6	-1.1	0	8	-0.3	-1	0.5	16	0.45335	1
CALB2_MOUSE,	3.6	3.2	4	21	3.8	3.4	4.2	27	-0.2	-0.7	0.3	48	0.45362	1
Q8K232_MOUSE,ADDA_MOUSE,	-0.5	-0.8	-0.3	38	-0.4	-0.7	-0.2	36	-0.1	-0.5	0.2	74	0.45367	1
SGTA_MOUSE,Q3TN35_MOUSE,	0.2	-0.4	0.8	8	0.5	0	0.9	9	-0.3	-1	0.5	17	0.45418	1
Q545Q8_MOUSE,PMM1_MOUSE,	1.1	0.3	1.9	4	0.6	-0.2	1.5	3	0.4	-0.7	1.6	7	0.45497	1
GNPI1_MOUSE,Q91WJ4_MOUSE,	0.9	0	1.9	3	0.4	-0.2	1.2	6	0.4	-0.7	1.7	9	0.45503	1
FTHFD_MOUSE,	-0.1	-0.4	0.2	38	-0.2	-0.4	0.1	46	0.1	-0.2	0.5	84	0.45725	1
Q4FJX9_MOUSE,SODM_MOUSE,	1	0.7	1.2	37	0.8	0.5	1.1	21	0.1	-0.2	0.5	58	0.45747	1
ADT1_MOUSE,Q8BVI9_MOUSE,	-0.5	-0.9	-0.2	22	-0.4	-0.6	-0.1	37	-0.1	-0.6	0.3	59	0.45992	1
HNRL2_MOUSE,	-1.4	-1.8	-0.9	10	-1.1	-1.6	-0.7	11	-0.2	-0.9	0.4	21	0.46034	1
UCRI_MOUSE,	-0.5	-1.1	0.1	6	-0.2	-0.8	0.4	6	-0.3	-1.1	0.5	12	0.46216	1
Q80YU5_MOUSE,MOG_MOUSE,Q66JM2_MOUSE,Q29ZQ5_MOUSE,Q3UY21_MOUSE,	0.1	-0.5	0.7	7	-0.2	-0.9	0.4	6	0.3	-0.6	1.2	13	0.46619	1
DPYL5_MOUSE,	0.4	0.2	0.7	29	0.6	0.3	0.8	40	-0.1	-0.5	0.2	69	0.46663	1
Q3UK27_MOUSE,ULA1_MOUSE,	0.4	-0.2	0.9	7	0.1	-0.2	0.6	17	0.2	-0.4	0.9	24	0.4674	1
ASGL1_MOUSE,	0.2	-0.4	0.8	14	-0.1	-0.5	0.4	16	0.2	-0.4	1	30	0.46779	1
Q53ZT3_MOUSE,Q3TWF3_MOUSE,A4_MOUSE,Q6GR78_MOUSE,	0.3	-0.2	0.8	11	0.5	0	1	10	-0.2	-0.9	0.4	21	0.46864	1
Q8R5L1_MOUSE,	1.1	0.7	1.5	12	0.9	0.5	1.3	12	0.2	-0.4	0.7	24	0.47012	1
RL7_MOUSE,Q5M9N8_MOUSE,Q3UBI6_MOUSE,	-3	-3.6	-2.4	6	-2.7	-3.2	-2.3	8	-0.3	-1	0.5	14	0.47119	1
TRFE_MOUSE,	0.9	0.6	1.3	24	0.8	0.5	1.1	26	0.1	-0.3	0.6	50	0.47136	1
Q3TEL0_MOUSE,	0.9	0.3	1.6	7	0.7	0	1.3	8	0.3	-0.6	1.2	15	0.47159	1
Q3THU8_MOUSE,MPCP_MOUSE,	-0.4	-1.1	0.1	7	-0.2	-0.6	0.2	16	-0.2	-1	0.4	23	0.47363	1
AIBP_MOUSE,	1.3	1	1.7	17	1.2	0.8	1.5	15	0.2	-0.3	0.6	32	0.47401	1
Q9CXY0_MOUSE,A2CG14_MOUSE,RALA_MOUSE,	-0.3	-1	0.5	9	0.1	-0.6	0.8	6	-0.3	-1.3	0.7	15	0.47415	1
Q8BPG5_MOUSE,Q3TLP8_MOUSE,Q9D859_MOUSE,RAC1_MOUSE,	-1.8	-2.3	-1.3	6	-1.6	-1.9	-1.2	11	-0.2	-0.8	0.4	17	0.47438	1
Q3UJS0_MOUSE,RL8_MOUSE,	-1.1	-1.6	-0.6	8	-0.9	-1.3	-0.5	10	-0.2	-0.8	0.4	18	0.47463	1
Q543U3_MOUSE,Q8C7W8_MOUSE,Q8C3T7_MOUSE,EAA1_MOUSE,	0	-0.8	0.7	5	0.3	-0.3	0.9	7	-0.3	-1.3	0.6	12	0.47521	1
Q3TMU8_MOUSE,DPYL4_MOUSE,	0.5	0.3	0.8	39	0.4	0.2	0.7	42	0.1	-0.2	0.5	81	0.47634	1
ESTD_MOUSE,	1.1	0.8	1.4	27	1	0.7	1.3	26	0.1	-0.3	0.5	53	0.47641	1
A7VMV2_MOUSE,CRYL1_MOUSE,	1.4	0.9	2	7	1.2	0.8	1.7	12	0.2	-0.4	0.9	19	0.47759	1
Q3TN61_MOUSE,Q4VAE6_MOUSE,RHOA_MOUSE,	-1	-1.5	-0.5	9	-0.8	-1.2	-0.4	12	-0.2	-0.8	0.4	21	0.47921	1
B2RSR7_MOUSE,GPD1L_MOUSE,	-0.2	-0.5	0.1	28	0	-0.4	0.3	21	-0.1	-0.6	0.3	49	0.47929	1
Q3USR5_MOUSE,FBX2_MOUSE,B2KFV9_MOUSE,	1.2	0.5	1.8	4	0.9	0.4	1.4	8	0.3	-0.5	1.1	12	0.48039	1
SNP25_MOUSE,	-1.5	-1.9	-1.2	13	-1.4	-1.8	-0.9	10	-0.2	-0.7	0.4	23	0.4821	1
Q3UQ73_MOUSE,	-0.3	-0.7	0.2	15	-0.1	-0.5	0.3	19	-0.2	-0.7	0.4	34	0.48213	1
Q5BKR9_MOUSE,	0	-0.6	0.5	12	0.2	-0.3	0.8	14	-0.3	-1	0.5	26	0.48228	1
A5GZX3_MOUSE,LGUL_MOUSE,	1.5	1	1.9	11	1.3	0.8	1.7	9	0.2	-0.4	0.8	20	0.48249	1
GSH1_MOUSE,Q3TEF1_MOUSE,	-0.3	-1.2	0.7	3	0.1	-0.5	0.8	8	-0.4	-1.6	0.7	11	0.48313	1
A2CFA7_MOUSE,PSB6_MOUSE,	1.3	0.8	1.7	12	1	0.5	1.6	6	0.2	-0.4	0.8	18	0.48533	1
GCSP_MOUSE,	0.7	0.1	1.3	8	0.4	-0.2	1.1	6	0.3	-0.6	1.1	14	0.48541	1
A2A7S7_MOUSE,SYYC_MOUSE,	0.9	0.4	1.4	14	0.7	0.2	1.1	26	0.2	-0.4	0.9	40	0.48545	1
Q4KML7_MOUSE,EZRI_MOUSE,Q3UL48_MOUSE,	-0.4	-0.7	-0.1	23	-0.3	-0.6	0	24	-0.1	-0.6	0.3	47	0.48972	1
Q5FB19_MOUSE,ROA3_MOUSE,A2AL12_MOUSE,Q6P6I7_MOUSE,Q3UZG3_MOUSE,	0	-0.2	0.3	39	0.1	-0.1	0.4	50	-0.1	-0.4	0.2	89	0.49082	1
NDUV1_MOUSE,	0.9	-0.1	1.9	2	0.5	-0.2	1.2	4	0.4	-0.8	1.7	6	0.49252	1
Q3TGU7_MOUSE,PA2G4_MOUSE,	1.3	0.9	1.7	16	1.1	0.7	1.5	17	0.2	-0.4	0.7	33	0.49308	1
Q3UW66_MOUSE,THTM_MOUSE,Q505N7_MOUSE,	0.5	0.1	0.8	15	0.3	-0.1	0.7	14	0.2	-0.3	0.6	29	0.49312	1
PP2BB_MOUSE,	-0.6	-0.9	-0.3	29	-0.5	-0.8	-0.3	32	-0.1	-0.5	0.3	61	0.49461	1
EFTU_MOUSE,	-2.9	-3.3	-2.6	17	-2.8	-3.1	-2.5	19	-0.1	-0.6	0.3	36	0.49549	1
Q544Z7_MOUSE,APEX1_MOUSE,	1.2	0.8	1.6	11	1	0.6	1.5	8	0.2	-0.4	0.8	19	0.5021	1
Q80W09_MOUSE,DC1I1_MOUSE,	-0.7	-1.4	-0.2	7	-1.1	-1.7	-0.4	4	0.3	-0.6	1.2	11	0.50324	1
CLYBL_MOUSE,	-0.7	-1.2	-0.2	8	-0.5	-1	0.1	6	-0.2	-1	0.5	14	0.50447	1
THIC_MOUSE,	1	0.7	1.3	21	0.9	0.5	1.2	24	0.1	-0.3	0.6	45	0.50507	1
Q3T1F6_MOUSE,Q3ZB61_MOUSE,MAG_MOUSE,Q3ZB60_MOUSE,Q3ZB62_MOUSE,	0.7	-0.1	1.6	4	0.4	-0.6	1.3	5	0.4	-0.8	1.7	9	0.50782	1
AL7A1_MOUSE,Q3UKT6_MOUSE,Q3TFC7_MOUSE,	1.3	1	1.7	25	1.2	0.9	1.5	24	0.1	-0.3	0.6	49	0.50909	1
Q3U2F9_MOUSE,Q3THF3_MOUSE,GBB4_MOUSE,	-0.2	-0.6	0.2	9	-0.4	-0.8	0.1	10	0.2	-0.4	0.8	19	0.5091	1
HNRPQ_MOUSE,	-0.6	-1.1	-0.2	10	-0.4	-0.8	-0.1	15	-0.2	-0.8	0.4	25	0.51236	1
CALR_MOUSE,Q3UWP8_MOUSE,B2MWM9_MOUSE,	1	0.8	1.3	34	0.9	0.7	1.2	34	0.1	-0.2	0.4	68	0.51271	1
Q5BL10_MOUSE,	-1.4	-1.7	-1	17	-1.2	-1.6	-0.8	12	-0.2	-0.7	0.4	29	0.51312	1
Q3U4W8_MOUSE,UBP5_MOUSE,	-2	-2.4	-1.5	10	-1.8	-2.2	-1.3	12	-0.2	-0.8	0.4	22	0.51486	1
HPCL1_MOUSE,	0.9	0.2	1.7	5	1.2	0.6	1.9	8	-0.3	-1.3	0.7	13	0.51553	1
Q99N15_MOUSE,	1.4	1.2	1.7	57	1.4	1.1	1.6	39	0.1	-0.2	0.4	96	0.51705	1
PURB_MOUSE,	-1.3	-1.9	-0.7	5	-1.1	-1.7	-0.5	5	-0.3	-1.1	0.6	10	0.5174	1
Q3UGC2_MOUSE,	0.5	0.2	0.8	31	0.6	0.3	0.9	38	-0.1	-0.5	0.3	69	0.51744	1
TRXR2_MOUSE,	1.5	0.6	2.6	2	1.2	0.4	1.9	5	0.4	-0.8	1.7	7	0.51896	1
Q3TUE1_MOUSE,Q0P6B2_MOUSE,Q3UUU2_MOUSE,FUBP1_MOUSE,	-0.6	-1.4	0.3	3	-0.1	-1.2	0.9	2	-0.4	-1.8	0.9	5	0.51899	1
Q543Q4_MOUSE,RAB3D_MOUSE,	0	-0.5	0.5	8	0.3	-0.4	0.8	6	-0.2	-1	0.6	14	0.52219	1
CATB_MOUSE,Q3TVS6_MOUSE,	1	0.6	1.3	23	0.8	0.5	1.1	27	0.1	-0.3	0.5	50	0.52253	1
Q5EBQ0_MOUSE,VDAC3_MOUSE,Q3TTN3_MOUSE,Q3TX38_MOUSE,	0.5	-0.4	1.4	4	0.9	0.1	1.6	4	-0.3	-1.5	0.8	8	0.52361	1
Q8C2D7_MOUSE,Q80WV6_MOUSE,ANM1_MOUSE,Q3UIG8_MOUSE,Q80WB1_MOUSE,Q3TPF5_MOUSE,	1.1	0.6	1.6	11	0.9	0.1	1.5	7	0.3	-0.6	1.1	18	0.52371	1
ODP2_MOUSE,	-0.9	-1.4	-0.4	10	-0.7	-1.1	-0.2	10	-0.2	-0.8	0.5	20	0.52397	1
PSA5_MOUSE,Q3TUX3_MOUSE,Q3TUI9_MOUSE,Q3UPK6_MOUSE,	1.2	0.8	1.6	11	1	0.7	1.4	17	0.2	-0.4	0.7	28	0.52496	1
PTPRJ_MOUSE,	1.4	0.6	2.7	4	1.2	0.4	1.9	6	0.4	-0.8	2	10	0.52567	1
Q4FJM5_MOUSE,RHOB_MOUSE,	-0.5	-1.2	0.2	5	-0.3	-0.8	0.3	7	-0.3	-1.1	0.6	12	0.52707	1
Q7JD03_MOUSE,A3E4B0_MOUSE,Q5GA81_MUSMM,A3R481_MOUSE,A3R455_MUSMC,Q7JCZ1_MOUSE,COX2_MOUSE,	0.1	-0.3	0.6	9	0.3	-0.2	0.8	8	-0.2	-0.8	0.4	17	0.52766	1
B1AT82_MOUSE,KPRA_MOUSE,	-3.4	-4.5	-2.5	2	-3	-3.7	-2.4	6	-0.4	-1.6	0.8	8	0.52783	1
KAPCB_MOUSE,	-2.2	-2.7	-1.7	5	-2	-2.5	-1.5	7	-0.2	-0.9	0.5	12	0.52785	1
Q3UUK5_MOUSE,Q7TN74_MOUSE,Q7TSA7_MOUSE,	-1.2	-1.9	-0.5	6	-1	-1.6	-0.3	7	-0.3	-1.2	0.7	13	0.52875	1
SRA1_MOUSE,	0.9	-0.1	1.9	2	1.4	0.4	2.3	2	-0.4	-1.8	1	4	0.52899	1
ATP5H_MOUSE,B1ASE2_MOUSE,	-0.2	-1	0.5	4	0.1	-0.6	0.7	5	-0.3	-1.3	0.7	9	0.5292	1
Q6NXI9_MOUSE,KIF5C_MOUSE,Q8CHF1_MOUSE,	-1.4	-1.7	-1	29	-1.2	-1.6	-0.9	21	-0.1	-0.5	0.3	50	0.53166	1
K2C1_MOUSE,	6.7	6.3	7	32	6.8	6.4	7	21	-0.1	-0.5	0.3	53	0.53229	1
Q3U0T9_MOUSE,RAB35_MOUSE,	0.5	0.1	0.9	16	0.4	0	0.7	13	0.2	-0.4	0.7	29	0.53275	1
PCCA_MOUSE,Q3UGC8_MOUSE,	0.6	0.1	1	15	0.7	0.4	1	27	-0.2	-0.7	0.4	42	0.53866	1
MECP2_MOUSE,	0.4	0	0.9	15	0.6	0.2	1	19	-0.2	-0.7	0.4	34	0.54014	1
Q3TIC8_MOUSE,Q3TV75_MOUSE,QCR1_MOUSE,	-0.4	-0.9	0.1	9	-0.2	-0.7	0.3	9	-0.2	-0.9	0.5	18	0.54108	1
SFRS7_MOUSE,Q3THA6_MOUSE,	0.4	0	0.9	12	0.3	-0.2	0.7	12	0.2	-0.4	0.7	24	0.54116	1
RL9_MOUSE,Q5EBQ6_MOUSE,	-2	-3	-1.1	3	-1.6	-2.4	-0.9	3	-0.3	-1.7	0.8	6	0.54304	1
DPP6_MOUSE,Q5U4C2_MOUSE,Q80VM5_MOUSE,	-0.4	-1.3	0.4	4	-0.1	-0.8	0.7	4	-0.3	-1.4	0.8	8	0.5432	1
LPPRC_MOUSE,	-1.9	-2.5	-1.2	7	-1.6	-2.2	-1.2	11	-0.2	-1	0.6	18	0.54404	1
Q3US29_MOUSE,Q4FJN9_MOUSE,Q5M8R9_MOUSE,Q3TMB3_MOUSE,FPPS_MOUSE,	-2.1	-3.2	-1.2	2	-1.8	-2.6	-1	2	-0.4	-1.7	0.9	4	0.54475	1
ACTY_MOUSE,	-0.3	-0.9	0.2	8	-0.1	-0.6	0.3	10	-0.2	-0.9	0.5	18	0.54506	1
RANG_MOUSE,	0.7	0.2	1.2	6	0.9	0.4	1.4	9	-0.2	-0.9	0.5	15	0.54565	1
Q3UL45_MOUSE,	-1.2	-1.9	-0.6	5	-1	-1.4	-0.6	11	-0.2	-1	0.5	16	0.54675	1
GLO2_MOUSE,	0.9	0.6	1.2	24	0.8	0.5	1.1	20	0.1	-0.3	0.5	44	0.5474	1
Q6ZWM5_MOUSE,	1.3	0.7	1.9	6	1	0.4	1.7	8	0.3	-0.6	1.1	14	0.54762	1
Q5SUR3_MOUSE,SKP1_MOUSE,	0.4	-0.5	1.3	3	0.7	0.2	1.2	8	-0.3	-1.3	0.7	11	0.54936	1
STRN3_MOUSE,	-0.5	-1.2	0.3	7	-0.1	-1.1	0.9	3	-0.4	-1.6	0.9	10	0.55047	1
Q3UEW2_MOUSE,	0.3	-0.7	1.2	3	-0.2	-1.3	1	2	0.4	-1	1.9	5	0.5507	1
NPS3A_MOUSE,B1AWZ4_MOUSE,	2	1.5	2.4	12	1.8	1.3	2.3	7	0.2	-0.5	0.8	19	0.55376	1
Q80Y72_MOUSE,Q3V2I7_MOUSE,Q64FK4_MOUSE,Q64FK5_MOUSE,	-1.3	-1.9	-0.6	4	-1	-1.7	-0.3	5	-0.3	-1.2	0.7	9	0.55627	1
DDAH1_MOUSE,	1.4	1.2	1.7	40	1.4	1.1	1.6	39	0.1	-0.2	0.4	79	0.55862	1
PSD3_MOUSE,	-1.7	-2.1	-1.4	15	-1.6	-2	-1.2	17	-0.1	-0.6	0.3	32	0.55868	1
Q3UGW4_MOUSE,CLPP_MOUSE,	0.7	0	1.4	5	1	0.2	1.9	2	-0.3	-1.4	0.8	7	0.55911	1
GLOD4_MOUSE,	-0.6	-1	-0.2	18	-0.7	-1.1	-0.4	25	0.1	-0.3	0.6	43	0.55968	1
AIMP1_MOUSE,Q3UZG4_MOUSE,	-0.2	-1.4	1	3	-0.6	-1.4	0.2	3	0.4	-1	1.8	6	0.56147	1
Q80TH1_MOUSE,	-0.4	-0.9	0	12	-0.3	-0.7	0.2	13	-0.2	-0.8	0.5	25	0.56208	1
ROGDI_MOUSE,	-1.1	-2.1	-0.1	2	-0.6	-1.7	0.3	4	-0.4	-1.9	1	6	0.56208	1
Q14BL1_MOUSE,CE033_MOUSE,	0.5	-0.6	1.6	3	0.1	-0.8	1	3	0.4	-1	1.9	6	0.56325	1
4F2_MOUSE,Q3TN39_MOUSE,	-1.3	-2.2	-0.4	4	-1	-1.7	-0.1	4	-0.3	-1.6	0.9	8	0.56394	1
CLCB_MOUSE,	1.1	0.5	1.6	7	1.2	0.8	1.7	10	-0.2	-0.9	0.5	17	0.56412	1
Q543K5_MOUSE,SERC_MOUSE,Q3ULZ3_MOUSE,	0.6	0.3	0.9	25	0.7	0.4	1	29	-0.1	-0.5	0.3	54	0.5646	1
B1AWD9_MOUSE,B1AWD8_MOUSE,	0.7	0.3	1.1	8	0.9	0.5	1.3	12	-0.2	-0.7	0.4	20	0.56726	1
D0VYV6_MOUSE,	-2	-2.3	-1.6	14	-1.8	-2.1	-1.5	19	-0.1	-0.6	0.4	33	0.56731	1
Q3UF58_MOUSE,Q542K4_MOUSE,Q3TVZ1_MOUSE,CATA_MOUSE,Q3TXQ6_MOUSE,Q3UZE7_MOUSE,Q8C6E3_MOUSE,	1	0.1	2	3	1.3	0.7	1.9	8	-0.3	-1.4	0.9	11	0.56937	1
GNAS1_MOUSE,GNAS2_MOUSE,	-0.3	-1.5	0.8	2	0.1	-0.8	0.9	3	-0.4	-1.9	1	5	0.56943	1
Q3UDK4_MOUSE,	-0.3	-0.6	0	27	-0.4	-0.7	-0.1	37	0.1	-0.3	0.5	64	0.57181	1
F164A_MOUSE,	-0.6	-1.3	0.1	4	-0.3	-1.1	0.5	4	-0.3	-1.4	0.8	8	0.57434	1
Q3TG68_MOUSE,Q3TL72_MOUSE,	0.5	-0.1	1.2	7	0.3	-0.2	0.8	9	0.2	-0.6	1.1	16	0.57475	1
B1AQY8_MOUSE,B1AQY9_MOUSE,B7ZC46_MOUSE,SEPT8_MOUSE,B1AQZ0_MOUSE,	-2.1	-2.7	-1.5	4	-1.9	-2.4	-1.4	7	-0.2	-1	0.6	11	0.57614	1
KAD1_MOUSE,	-0.4	-0.7	-0.1	26	-0.5	-0.8	-0.1	14	0.1	-0.3	0.6	40	0.5779	1
Q3TY87_MOUSE,	1.4	0.9	2	11	1.2	0.7	1.7	8	0.2	-0.5	0.9	19	0.57857	1
Q3TL20_MOUSE,	-1.6	-2.2	-1	5	-1.4	-1.8	-0.9	8	-0.2	-0.9	0.5	13	0.57928	1
ACADL_MOUSE,	1	0.7	1.4	20	0.9	0.6	1.2	29	0.1	-0.3	0.6	49	0.5802	1
Q99KF5_MOUSE,B1B0W8_MOUSE,HPRT_MOUSE,	0.3	0	0.7	16	0.5	0.1	0.8	19	-0.1	-0.6	0.4	35	0.58097	1
FA49A_MOUSE,	-1.5	-2.3	-0.7	3	-1.3	-1.9	-0.6	4	-0.3	-1.3	0.7	7	0.58146	1
Q5HZI6_MOUSE,FCL_MOUSE,	1.3	0.6	2.1	4	1.1	0.3	1.8	4	0.3	-0.8	1.3	8	0.58153	1
SYFA_MOUSE,	-1.2	-2	-0.4	4	-0.9	-1.5	-0.3	6	-0.3	-1.2	0.7	10	0.58521	1
Q9D927_MOUSE,	0.8	-0.1	1.6	2	1.1	0.2	1.9	3	-0.3	-1.5	0.8	5	0.58705	1
K1107_MOUSE,	-0.8	-1.3	-0.3	9	-1.1	-2	-0.1	3	0.3	-0.8	1.3	12	0.58959	1
PPR1B_MOUSE,	0.9	0.4	1.5	5	1.1	0.6	1.6	6	-0.2	-0.9	0.6	11	0.59296	1
HCDH_MOUSE,	0.6	0.2	1	17	0.5	0.1	0.9	13	0.1	-0.4	0.6	30	0.59434	1
Q3TZQ2_MOUSE,MOES_MOUSE,	0.1	-0.4	0.5	14	0.2	-0.2	0.6	21	-0.1	-0.7	0.4	35	0.59526	1
P5CR3_MOUSE,	1	0.4	1.5	8	0.8	0.2	1.3	8	0.2	-0.5	0.9	16	0.59595	1
A1A4T2_MOUSE,GANAB_MOUSE,	0.1	-0.3	0.5	14	0.2	-0.2	0.6	21	-0.1	-0.7	0.4	35	0.59649	1
Q60I30_MOUSE,ITPA_MOUSE,	-1.2	-2	-0.4	3	-0.9	-1.7	-0.2	3	-0.3	-1.3	0.8	6	0.59685	1
NEUL_MOUSE,	0.6	-0.1	1.3	8	0.3	-0.3	1	6	0.2	-0.7	1.2	14	0.59733	1
AN32B_MOUSE,Q3UW32_MOUSE,	1.5	0.8	2.1	4	1.2	0.5	1.9	3	0.2	-0.7	1.2	7	0.60076	1
CDC42_MOUSE,	-1.1	-1.6	-0.5	5	-0.9	-1.5	-0.2	4	-0.2	-1	0.6	9	0.60121	1
HDGR2_MOUSE,	0.6	-0.1	1.3	5	0.9	-0.2	2	2	-0.3	-1.6	0.9	7	0.6016	1
GSTO1_MOUSE,	1.5	0.9	2.1	5	1.3	0.9	1.8	9	0.2	-0.6	0.9	14	0.60339	1
DCE1_MOUSE,Q548L6_MOUSE,	0.4	-0.3	1.1	7	0.6	-0.1	1.3	5	-0.3	-1.2	0.7	12	0.60429	1
HPCA_MOUSE,	0.8	0.1	1.6	3	1.1	0.5	1.7	6	-0.2	-1.2	0.7	9	0.60686	1
Q3TPJ8_MOUSE,A2BFF9_MOUSE,A2BFF7_MOUSE,DC1I2_MOUSE,A2BFF8_MOUSE,A2BFF5_MOUSE,	-0.4	-1.1	0.3	4	-0.7	-1.3	0	5	0.2	-0.7	1.2	9	0.60701	1
Q3TKZ9_MOUSE,Q3UBB6_MOUSE,Q8CE21_MOUSE,Q6ZQK6_MOUSE,Q3UI16_MOUSE,Q3U6W2_MOUSE,	0.5	-0.1	1	7	0.7	0	1.3	5	-0.2	-1	0.6	12	0.60867	1
Q7TMG8_MOUSE,NIPS2_MOUSE,Q3TD78_MOUSE,	0.7	0.4	1	17	0.6	0.2	0.9	15	0.1	-0.4	0.6	32	0.61008	1
NEGR1_MOUSE,A0A4W9_MOUSE,	0.7	-0.2	1.6	3	0.4	-0.3	1.1	6	0.3	-0.8	1.4	9	0.6103	1
HDGF_MOUSE,	0.6	0.1	1.1	9	0.4	-0.2	1.1	5	0.2	-0.6	1	14	0.61081	1
AIDA_MOUSE,	1.2	0.4	2	2	0.9	-0.1	1.8	3	0.3	-0.9	1.5	5	0.61696	1
NCALD_MOUSE,	1.1	0.4	1.9	3	1.4	0.8	1.9	7	-0.2	-1.2	0.7	10	0.61728	1
NCS1_MOUSE,	0.7	-0.3	1.8	2	1.1	0.1	2	2	-0.3	-1.8	1	4	0.61746	1
Q6ZWR0_MOUSE,RAP2B_MOUSE,	1.2	0.4	1.9	5	0.9	0.3	1.6	6	0.2	-0.7	1.3	11	0.61989	1
METK2_MOUSE,Q99J57_MOUSE,	0.9	0.2	1.5	6	0.7	0.2	1.1	10	0.2	-0.6	0.9	16	0.62037	1
Q3UB67_MOUSE,Q3T9U9_MOUSE,Q3UB90_MOUSE,Q3UB15_MOUSE,Q91VJ6_MOUSE,RL3_MOUSE,	-1	-1.8	-0.2	4	-1.2	-1.7	-0.7	6	0.2	-0.7	1.1	10	0.62052	1
Q3U5V2_MOUSE,CNBP_MOUSE,Q3ULK8_MOUSE,Q3U935_MOUSE,Q5QJQ9_MOUSE,	1	0.1	2	3	0.7	0	1.5	3	0.3	-0.9	1.6	6	0.62199	1
HOME1_MOUSE,	-0.6	-1.4	0.2	4	-0.4	-0.9	0.2	10	-0.2	-1.2	0.7	14	0.62273	1
Q6PAC1_MOUSE,GELS_MOUSE,A2AL35_MOUSE,	-1.1	-1.8	-0.4	7	-1.3	-1.8	-0.8	7	0.2	-0.6	1	14	0.62368	1
Q3TA80_MOUSE,CNDP2_MOUSE,	1.1	0.7	1.5	19	1	0.6	1.3	24	0.1	-0.4	0.6	43	0.62754	1
PPP5_MOUSE,	0.9	0.5	1.2	20	0.7	0.4	1.1	21	0.1	-0.4	0.6	41	0.62777	1
FGF12_MOUSE,	1.5	0.9	2.1	4	1.3	0.8	1.9	6	0.2	-0.6	1	10	0.63058	1
CRYAB_MOUSE,Q52L78_MOUSE,	1.7	0.8	2.6	2	1.4	0.6	2.2	3	0.3	-0.9	1.5	5	0.63108	1
SFPQ_MOUSE,	-0.3	-0.6	0	27	-0.2	-0.5	0.1	32	-0.1	-0.5	0.3	59	0.6324	1
FA49B_MOUSE,	-1.3	-1.7	-0.8	8	-1.2	-1.5	-0.8	15	-0.1	-0.7	0.4	23	0.63248	1
Q76LV5_MOUSE,Q6P716_MOUSE,RASH_MOUSE,	-0.1	-0.9	0.7	3	0.1	-0.5	0.8	5	-0.2	-1.2	0.8	8	0.63317	1
B1AQF4_MOUSE,DUS3_MOUSE,B1AQF3_MOUSE,	-2	-2.5	-1.5	8	-1.8	-2.4	-1.3	8	-0.2	-0.9	0.6	16	0.63504	1
ADT2_MOUSE,Q545A2_MOUSE,	-0.6	-0.9	-0.2	22	-0.5	-0.8	-0.2	30	-0.1	-0.5	0.3	52	0.6367	1
PHIPL_MOUSE,	-2.2	-2.9	-1.7	6	-2.1	-2.5	-1.6	9	-0.2	-1	0.6	15	0.63794	1
Q6PDH1_MOUSE,	-1.3	-1.5	-1.1	63	-1.3	-1.6	-1.1	52	0.1	-0.2	0.3	115	0.63895	1
CAPR1_MOUSE,	0.2	-0.5	0.9	6	0.4	-0.2	1	7	-0.2	-1.1	0.7	13	0.63925	1
DREB_MOUSE,	-0.1	-0.5	0.2	26	-0.1	-0.3	0.2	32	-0.1	-0.5	0.3	58	0.64006	1
Q69ZX9_MOUSE,	-1.1	-1.4	-0.8	19	-1.2	-1.5	-0.9	25	0.1	-0.3	0.5	44	0.64065	1
A2AH73_MOUSE,Q91V28_MOUSE,Q3UAG2_MOUSE,6PGD_MOUSE,	1.5	1.2	1.8	27	1.4	1.1	1.7	20	0.1	-0.4	0.5	47	0.64079	1
Q6NXW4_MOUSE,Q3TT79_MOUSE,PDIA4_MOUSE,Q3UJW0_MOUSE,	0.2	-0.5	0.9	5	0.4	0	0.8	14	-0.2	-1	0.6	19	0.64157	1
PP2AB_MOUSE,	1.2	0.9	1.4	45	1.1	0.9	1.3	48	0.1	-0.2	0.4	93	0.64243	1
Q3UNH3_MOUSE,TXNL1_MOUSE,Q3U8R9_MOUSE,	-0.2	-1	0.5	5	0	-0.5	0.5	10	-0.2	-1.1	0.7	15	0.64356	1
NEUM_MOUSE,	2.2	2	2.4	45	2.1	1.9	2.4	36	0.1	-0.2	0.4	81	0.64582	1
TCPD_MOUSE,Q3TII0_MOUSE,Q564F4_MOUSE,Q3UJZ8_MOUSE,	-0.9	-1.6	-0.2	6	-1.1	-1.7	-0.5	5	0.2	-0.7	1.1	11	0.64659	1
PP2AA_MOUSE,	1.2	0.9	1.4	46	1.1	0.9	1.3	48	0.1	-0.2	0.4	94	0.64802	1
ETFA_MOUSE,B1B1B4_MOUSE,	-1.3	-1.6	-1	18	-1.4	-1.8	-1.1	15	0.1	-0.4	0.5	33	0.6483	1
Q8R0X4_MOUSE,Q61177_MOUSE,	-0.1	-0.5	0.3	14	0	-0.4	0.4	13	-0.1	-0.6	0.4	27	0.64968	1
TWF2_MOUSE,	-2	-2.5	-1.5	8	-2.2	-2.6	-1.7	13	0.2	-0.5	0.8	21	0.65071	1
Q3TXB1_MOUSE,Q9DCM6_MOUSE,Q3UBX7_MOUSE,C1QA_MOUSE,	1.4	0.7	2.1	6	1.2	0.6	1.9	7	0.2	-0.7	1.2	13	0.65154	1
Q3UKH3_MOUSE,THIM_MOUSE,Q3TIT9_MOUSE,	0.9	0.4	1.3	9	0.7	0.4	1.1	21	0.1	-0.5	0.7	30	0.65158	1
PRDX2_MOUSE,	0.1	-0.2	0.4	30	0	-0.2	0.3	29	0.1	-0.3	0.4	59	0.65328	1
ATPO_MOUSE,	0	-0.3	0.3	24	0.1	-0.3	0.5	15	-0.1	-0.6	0.4	39	0.65548	1
Q91X95_MOUSE,GNA11_MOUSE,Q3UPA1_MOUSE,	-0.6	-1.6	0.5	3	-0.3	-1.2	0.7	3	-0.3	-1.7	1.1	6	0.65552	1
MAP4_MOUSE,	0.2	-0.1	0.5	39	0.1	-0.2	0.5	22	0.1	-0.3	0.5	61	0.65836	1
F10A1_MOUSE,Q3U8D2_MOUSE,Q3U9V1_MOUSE,	0.3	-0.3	0.8	6	0.5	-0.1	1.1	6	-0.2	-1	0.6	12	0.65857	1
RL35_MOUSE,	0	-1	1.1	2	0.3	-0.6	1.3	3	-0.3	-1.7	1.1	5	0.65865	1
ARF5_MOUSE,	-1.8	-2.9	-0.9	2	-1.6	-2.5	-0.7	2	-0.3	-1.7	1	4	0.66122	1
HNRPK_MOUSE,Q3TL71_MOUSE,Q5FWJ5_MOUSE,Q3TUA1_MOUSE,Q3TJ38_MOUSE,B2M1R6_MOUSE,	-1	-1.6	-0.5	8	-0.9	-1.3	-0.4	11	-0.1	-0.8	0.5	19	0.66287	1
A2AA77_MOUSE,DHSB_MOUSE,Q0QEZ4_MOUSE,	1.1	0.6	1.6	8	1.3	0.8	1.7	9	-0.1	-0.8	0.5	17	0.66311	1
Q3V3U0_MOUSE,PYGB_MOUSE,Q3UYH9_MOUSE,A2AWQ5_MOUSE,	0.2	0	0.4	97	0.1	-0.1	0.3	101	0.1	-0.2	0.3	198	0.66365	1
Q3TMZ8_MOUSE,ROAA_MOUSE,Q544Z3_MOUSE,Q80XR6_MOUSE,Q20BD0_MOUSE,Q9D6G1_MOUSE,	0.6	0.1	1.1	10	0.5	0.1	0.9	10	0.1	-0.5	0.8	20	0.66375	1
ROA2_MOUSE,	0.2	0	0.4	63	0.3	0	0.5	56	-0.1	-0.3	0.2	119	0.66397	1
AN32E_MOUSE,Q3TX26_MOUSE,	-0.1	-1.4	1.1	2	0.2	-0.6	0.9	4	-0.3	-1.7	1.1	6	0.66525	1
Q3TDJ2_MOUSE,Q05CJ5_MOUSE,Q3TC38_MOUSE,	-2.3	-3.5	-1.5	3	-2.1	-2.8	-1.4	5	-0.2	-1.7	0.9	8	0.66538	1
Q3UMP2_MOUSE,Q8QZS6_MOUSE,	-1.7	-2.6	-1	5	-1.5	-2.4	-0.7	3	-0.2	-1.4	0.9	8	0.66643	1
NDRG2_MOUSE,	-1.6	-2	-1.1	8	-1.4	-1.9	-1	10	-0.1	-0.7	0.5	18	0.66674	1
Q3UYN1_MOUSE,Q544R1_MOUSE,PROSC_MOUSE,	-1	-1.7	-0.4	6	-0.9	-1.6	0	5	-0.2	-1.3	0.8	11	0.66677	1
VP26A_MOUSE,	1	0.6	1.5	13	0.9	0.5	1.3	14	0.1	-0.4	0.7	27	0.66725	1
TPM4_MOUSE,	1	0.4	1.6	6	1.2	0.2	2.2	3	-0.2	-1.4	0.9	9	0.66873	1
Q3TXK7_MOUSE,	0.1	-0.2	0.5	17	0.2	-0.1	0.6	21	-0.1	-0.6	0.4	38	0.66882	1
OLA1_MOUSE,Q3TJF2_MOUSE,	-2.1	-2.6	-1.6	8	-2.2	-2.7	-1.8	10	0.1	-0.5	0.8	18	0.6711	1
HNRPC_MOUSE,Q3U6P5_MOUSE,	-0.3	-0.9	0.2	7	-0.2	-0.6	0.2	14	-0.1	-0.8	0.5	21	0.67225	1
GBLP_MOUSE,	1	0.7	1.3	27	0.9	0.6	1.2	26	0.1	-0.3	0.4	53	0.67449	1
Q545B6_MOUSE,Q9DCP3_MOUSE,Q9CXQ8_MOUSE,STMN1_MOUSE,Q91XT3_MOUSE,Q8C2H3_MOUSE,Q9CYU5_MOUSE,	0.7	-0.2	1.7	2	1	0.4	1.6	4	-0.2	-1.4	0.9	6	0.67472	1
PACS1_MOUSE,	-1.5	-2.2	-0.9	6	-1.8	-3.1	-0.7	4	0.3	-1	1.7	10	0.67591	1
TSR2_MOUSE,	0.8	-0.2	1.8	2	1.1	0.2	2	2	-0.3	-1.6	1.1	4	0.67608	1
CD47_MOUSE,Q3U967_MOUSE,	-1.3	-2.3	-0.2	2	-1	-1.8	-0.3	3	-0.3	-1.5	1	5	0.67643	1
B1AXW8_MOUSE,	0.7	0	1.3	7	0.5	0	1	10	0.2	-0.6	1	17	0.67653	1
ACBG1_MOUSE,	-1.2	-2.1	-0.2	3	-0.9	-1.5	-0.3	9	-0.2	-1.3	0.9	12	0.67691	1
CSK2B_MOUSE,	0.1	-0.5	0.8	5	0.3	-0.4	1	4	-0.2	-1.1	0.8	9	0.67773	1
Q3UJU1_MOUSE,	0.1	-0.7	0.8	8	-0.1	-1.1	0.8	4	0.2	-1	1.4	12	0.67898	1
PHB2_MOUSE,Q3V235_MOUSE,	0.3	-0.3	1	6	0.5	-0.1	1.1	8	-0.2	-1	0.7	14	0.6818	1
NHRF1_MOUSE,Q3TG37_MOUSE,	0	-0.5	0.5	8	-0.1	-0.6	0.4	9	0.1	-0.6	0.8	17	0.6818	1
PCKGM_MOUSE,	0	-0.8	0.8	6	0.2	-0.4	0.7	7	-0.2	-1.1	0.8	13	0.68196	1
GGCT_MOUSE,	0.9	0.1	1.7	4	0.7	0.2	1.3	8	0.2	-0.7	1.1	12	0.68264	1
Q3USC7_MOUSE,GD1L1_MOUSE,	-0.8	-1.8	0.1	3	-0.6	-1.4	0.2	4	-0.2	-1.4	0.9	7	0.68528	1
LYPA1_MOUSE,	-2.2	-3.5	-1.3	3	-2.4	-3.4	-1.8	4	0.2	-1.2	1.7	7	0.68827	1
RP3A_MOUSE,Q768S5_MOUSE,	-1	-1.3	-0.6	18	-0.9	-1.2	-0.6	19	-0.1	-0.5	0.4	37	0.689	1
Q3TA69_MOUSE,	-1	-1.3	-0.6	19	-1.1	-1.4	-0.7	24	0.1	-0.4	0.6	43	0.6893	1
EEA1_MOUSE,	0	-0.3	0.3	33	0.1	-0.2	0.4	34	-0.1	-0.5	0.3	67	0.69033	1
DNJC5_MOUSE,A2AUE2_MOUSE,	-0.9	-1.8	-0.1	2	-0.7	-1.5	0	3	-0.2	-1.3	0.9	5	0.69165	1
Q921K3_MOUSE,Q9DBP1_MOUSE,Q3UJV5_MOUSE,Q3TWW8_MOUSE,	0.9	0.2	1.6	5	0.7	0.2	1.3	6	0.2	-0.7	1.1	11	0.69191	1
Q3U3S0_MOUSE,STRN4_MOUSE,	-0.2	-1	0.6	3	-0.4	-1	0.3	5	0.2	-0.8	1.2	8	0.69232	1
Q3UCC6_MOUSE,SUCB1_MOUSE,Q3U6C7_MOUSE,	-2.7	-3.1	-2.3	9	-2.6	-3	-2.2	10	-0.1	-0.7	0.5	19	0.69242	1
Q8VDX8_MOUSE,SYHC_MOUSE,Q3UDH1_MOUSE,Q3TKU3_MOUSE,Q3U890_MOUSE,	1.1	0.6	1.6	11	1.3	0.8	1.7	12	-0.1	-0.8	0.5	23	0.69313	1
RAB8A_MOUSE,Q3UHW5_MOUSE,Q0PD50_MOUSE,	0	-0.6	0.7	4	0.2	-0.5	0.9	4	-0.2	-1.1	0.7	8	0.69524	1
RL12_MOUSE,Q3TIQ2_MOUSE,Q5BLK0_MOUSE,Q8C2K0_MOUSE,	0	-0.8	0.8	4	-0.2	-0.7	0.4	6	0.2	-0.8	1.1	10	0.69551	1
TIF1B_MOUSE,Q3UDN8_MOUSE,Q5EBP9_MOUSE,	-0.9	-1.6	-0.2	5	-0.7	-1.3	-0.1	5	-0.2	-1.1	0.7	10	0.69589	1
Q3ULF7_MOUSE,ARP3_MOUSE,Q3TWJ4_MOUSE,	0.3	0.1	0.6	36	0.3	0	0.5	34	0.1	-0.3	0.4	70	0.69597	1
APEH_MOUSE,	1.4	0.7	2	5	1.2	0.8	1.7	9	0.2	-0.7	0.9	14	0.69612	1
LEGLA_MOUSE,	-0.4	-1.3	0.5	2	-0.6	-1.3	0	4	0.2	-0.9	1.3	6	0.69713	1
B1AY07_MOUSE,CHMP5_MOUSE,	0.2	-0.6	1	3	0.4	-0.4	1.2	3	-0.2	-1.4	0.9	6	0.69771	1
1433S_MOUSE,Q3TEZ1_MOUSE,Q9JJ20_MOUSE,	0.3	0	0.6	14	0.2	-0.2	0.6	11	0.1	-0.4	0.6	25	0.69978	1
Q5RJH8_MOUSE,GPX1_MOUSE,	0.5	0	1	9	0.3	-0.6	1.2	3	0.2	-0.8	1.2	12	0.70026	1
SFXN3_MOUSE,	-0.4	-1	0.2	6	-0.3	-0.8	0.2	9	-0.1	-0.9	0.6	15	0.70045	1
OPLA_MOUSE,	0.1	-0.5	0.6	10	-0.1	-0.8	0.6	6	0.2	-0.7	1.1	16	0.70186	1
RTN4_MOUSE,	-0.6	-1.6	0.4	2	-0.5	-1.2	0.7	6	-0.2	-1.7	1	8	0.70483	1
TCEA1_MOUSE,Q3UWX7_MOUSE,	0.9	0.3	1.5	10	1	0.5	1.5	9	-0.1	-0.9	0.7	19	0.70746	1
RAP1B_MOUSE,Q52L50_MOUSE,	0.4	-0.2	1	5	0.5	0	1	8	-0.1	-0.9	0.6	13	0.70989	1
Q3V331_MOUSE,Q3UG14_MOUSE,GBB5_MOUSE,	-1.8	-2.8	-0.7	4	-1.6	-2	-1.1	8	-0.2	-1.3	0.9	12	0.71203	1
SRPK2_MOUSE,	-1.7	-2.5	-1	4	-1.9	-2.5	-1.3	5	0.2	-0.8	1.1	9	0.71279	1
BPHL_MOUSE,Q3TDN8_MOUSE,	1.1	0.8	1.5	21	1.1	0.7	1.4	21	0.1	-0.4	0.5	42	0.71326	1
DTD1_MOUSE,	0.9	0.4	1.4	8	0.8	0.3	1.2	7	0.1	-0.6	0.8	15	0.71383	1
A2BI12_MOUSE,PSIP1_MOUSE,Q05CD2_MOUSE,	0.9	-0.1	1.9	4	1	0.4	1.8	5	-0.2	-1.3	1.1	9	0.71678	1
Q8BU34_MOUSE,PSMD1_MOUSE,Q05CG9_MOUSE,	-0.9	-1.8	-0.1	3	-0.7	-1.7	0.3	3	-0.2	-1.5	1.1	6	0.71764	1
PIMT_MOUSE,Q545L9_MOUSE,	-1.5	-2	-1	9	-1.4	-1.9	-0.8	7	-0.1	-0.8	0.6	16	0.7177	1
TRXR1_MOUSE,	0.6	0	1.1	8	0.7	0.2	1.2	11	-0.1	-0.8	0.6	19	0.71773	1
PLD3_MOUSE,	0.9	0.4	1.5	7	0.8	0.3	1.3	10	0.1	-0.6	0.9	17	0.71857	1
QCR2_MOUSE,	-0.1	-0.6	0.3	14	0	-0.4	0.4	16	-0.1	-0.7	0.5	30	0.72111	1
IF1AX_MOUSE,B1AXP1_MOUSE,Q4FJR7_MOUSE,IF1A_MOUSE,Q3UC76_MOUSE,	1.1	0.3	1.9	2	0.9	0	1.7	3	0.2	-1	1.3	5	0.72174	1
CLIP1_MOUSE,	-0.1	-0.4	0.2	24	0	-0.3	0.3	26	-0.1	-0.5	0.4	50	0.72333	1
Q3TYL9_MOUSE,CN37_MOUSE,Q3TYV5_MOUSE,	-0.6	-0.8	-0.4	47	-0.7	-0.9	-0.4	48	0.1	-0.3	0.4	95	0.72348	1
B7ZC71_MOUSE,B7ZC72_MOUSE,CA123_MOUSE,A2A8E2_MOUSE,A2A8E1_MOUSE,	1.1	0.3	1.9	3	1.2	0.6	1.9	4	-0.2	-1.2	0.9	7	0.7239	1
PPIA_MOUSE,Q3TE63_MOUSE,Q5SVY2_MOUSE,Q3UAJ1_MOUSE,	1.1	0.5	1.8	7	1.3	0.8	1.8	10	-0.1	-0.9	0.7	17	0.72438	1
GNAQ_MOUSE,Q3UHH5_MOUSE,	-0.6	-1.5	0.4	3	-0.4	-1.2	0.4	4	-0.2	-1.4	1	7	0.72479	1
STRAP_MOUSE,B2RUC7_MOUSE,	0.9	0.5	1.2	15	0.8	0.4	1.1	16	0.1	-0.4	0.6	31	0.72585	1
AMPL_MOUSE,	1.2	0.8	1.6	20	1.3	0.9	1.6	23	-0.1	-0.6	0.4	43	0.72709	1
RL15_MOUSE,Q3U7D2_MOUSE,Q5M8Q0_MOUSE,	-1.6	-2.1	-1.1	7	-1.5	-2	-0.9	5	-0.1	-0.9	0.6	12	0.72813	1
Q3TFE5_MOUSE,Q3UDX4_MOUSE,DHX15_MOUSE,Q497W9_MOUSE,Q3UKJ6_MOUSE,	-1.7	-2.8	-0.7	4	-1.5	-2.1	-0.9	5	-0.2	-1.7	0.9	9	0.72833	1
Q3U6F6_MOUSE,Q8C483_MOUSE,SYSC_MOUSE,	0.3	-0.1	0.7	14	0.2	-0.2	0.6	16	0.1	-0.5	0.6	30	0.72997	1
BTBDH_MOUSE,	-0.5	-1.3	0.4	3	-0.7	-1.7	0.4	2	0.2	-1.1	1.6	5	0.73163	1
SNAA_MOUSE,	-0.3	-0.6	-0.1	35	-0.3	-0.5	0	36	-0.1	-0.4	0.3	71	0.73189	1
Q3UQY4_MOUSE,	0.8	0.2	1.3	8	0.9	0.4	1.4	9	-0.1	-0.8	0.6	17	0.73323	1
EPN1_MOUSE,	-0.1	-1.2	0.9	3	0	-0.5	0.6	9	-0.2	-1.4	1	12	0.73641	1
SUCA_MOUSE,	-1.7	-2	-1.3	15	-1.7	-2.1	-1.4	15	0.1	-0.4	0.5	30	0.73701	1
A2RRK1_MOUSE,	0.2	-0.4	0.8	7	0.3	-0.2	0.8	13	-0.1	-0.8	0.6	20	0.73774	1
Q3UXQ6_MOUSE,Q545F8_MOUSE,RS4X_MOUSE,Q545X8_MOUSE,	-1	-1.7	-0.3	4	-1.1	-1.6	-0.6	8	0.1	-0.7	1	12	0.73797	1
HPCL4_MOUSE,B2RRY8_MOUSE,	0.7	0.2	1.1	11	0.8	0.3	1.2	10	-0.1	-0.7	0.5	21	0.73831	1
K1C42_MOUSE,	6.7	6.1	7	13	6.8	6.3	7	17	-0.1	-0.8	0.5	30	0.73923	1
RAB1B_MOUSE,Q0PD66_MOUSE,	0.2	-0.2	0.5	17	0.1	-0.3	0.5	11	0.1	-0.5	0.6	28	0.74062	1
Q3UWT6_MOUSE,PSA2_MOUSE,Q6ZWV8_MOUSE,	1.1	0.8	1.3	34	1	0.7	1.3	25	0.1	-0.3	0.4	59	0.74303	1
ETFB_MOUSE,	-1.1	-1.4	-0.7	14	-1	-1.3	-0.7	17	-0.1	-0.6	0.4	31	0.74345	1
ECH1_MOUSE,	1.3	0.7	2	5	1.2	0.7	1.7	6	0.1	-0.7	0.9	11	0.7452	1
Q3UK24_MOUSE,WDR37_MOUSE,	0.1	-0.6	0.8	7	0	-0.4	0.4	17	0.1	-0.7	0.9	24	0.74526	1
Q3UBN8_MOUSE,BPNT1_MOUSE,	-0.7	-1.2	-0.2	9	-0.8	-1.3	-0.3	7	0.1	-0.6	0.8	16	0.74546	1
LGI1_MOUSE,	0.4	-0.2	1.1	8	0.6	0	1.1	7	-0.1	-0.9	0.7	15	0.74737	1
SYCC_MOUSE,	-0.2	-0.9	0.5	5	-0.3	-0.9	0.3	6	0.2	-0.8	1.1	11	0.74751	1
A5A4Z2_MOUSE,A5A4Y9_MOUSE,	1.3	0.6	2.1	3	1.1	0.1	2.2	2	0.2	-1.1	1.5	5	0.74951	1
PI42B_MOUSE,Q3UJ95_MOUSE,	-1.1	-2	-0.3	3	-1.2	-2.4	-0.3	3	0.2	-1.1	1.6	6	0.74999	1
CDV3_MOUSE,	0.7	0.1	1.4	4	0.9	0.1	1.7	2	-0.2	-1.2	0.9	6	0.75204	1
VPS29_MOUSE,	0.8	0.4	1.2	10	0.7	0.3	1.1	12	0.1	-0.5	0.6	22	0.75613	1
SYG_MOUSE,	0.3	-0.1	0.7	16	0.4	0	0.7	18	-0.1	-0.6	0.4	34	0.75626	1
CRKL_MOUSE,A2RS58_MOUSE,	0.5	-0.2	1.2	7	0.3	-0.3	1	5	0.1	-0.8	1.1	12	0.75749	1
A2AFL4_MOUSE,LYAG_MOUSE,	2.2	1.4	2.8	8	2	1.6	2.4	16	0.1	-0.7	0.9	24	0.75831	1
H2A2A_MOUSE,Q149V4_MOUSE,H2A2C_MOUSE,B2RWH3_MOUSE,Q64426_MOUSE,	-0.9	-1.5	-0.3	7	-0.7	-1.3	-0.2	10	-0.1	-0.9	0.7	17	0.7601	1
Q3TKM5_MOUSE,IDH3G_MOUSE,Q3TGZ3_MOUSE,	0.3	0	0.6	25	0.2	-0.1	0.5	23	0.1	-0.4	0.5	48	0.76284	1
C5H0E9_MOUSE,	0.5	-0.2	1.1	5	0.6	0.1	1.1	7	-0.1	-1	0.7	12	0.76314	1
EF1D_MOUSE,Q80T06_MOUSE,	-0.3	-1.2	0.6	3	-0.1	-0.9	0.6	3	-0.2	-1.3	1	6	0.76356	1
SFRS3_MOUSE,B2KF41_MOUSE,Q3U781_MOUSE,Q9D6W4_MOUSE,	0.3	-0.1	0.8	11	0.3	-0.1	0.6	18	0.1	-0.5	0.6	29	0.76402	1
MARE1_MOUSE,Q3U4H0_MOUSE,	0	-0.5	0.6	9	0.1	-0.4	0.7	9	-0.1	-0.9	0.7	18	0.76545	1
Q3USP9_MOUSE,MT3_MOUSE,	1.9	1.4	2.3	6	1.8	1.2	2.3	5	0.1	-0.6	0.8	11	0.7657	1
Q8VDC3_MOUSE,Q3TQ15_MOUSE,ACOC_MOUSE,	0.9	0.5	1.3	18	1	0.7	1.3	40	-0.1	-0.5	0.4	58	0.76648	1
A1E2B8_MOUSE,HS71A_MOUSE,Q3TAI8_MOUSE,Q3TU85_MOUSE,HS71B_MOUSE,	0.1	-0.2	0.4	25	0.2	-0.2	0.5	24	-0.1	-0.5	0.4	49	0.77368	1
Q5SQB0_MOUSE,NPM_MOUSE,Q5SQB7_MOUSE,Q5U438_MOUSE,	1.2	0.8	1.5	20	1.1	0.8	1.4	20	0.1	-0.4	0.6	40	0.77533	1
GMDS_MOUSE,	1.8	1.1	2.5	6	1.9	1.4	2.3	9	-0.1	-0.9	0.7	15	0.77593	1
CY1_MOUSE,	-0.3	-1	0.4	7	-0.2	-0.8	0.4	7	-0.1	-1	0.8	14	0.77666	1
MCCA_MOUSE,	1.1	0.3	1.8	5	1	0.3	1.6	10	0.1	-0.9	1.1	15	0.77915	1
HNRDL_MOUSE,	-0.3	-0.8	0.3	7	-0.2	-0.7	0.3	8	-0.1	-0.8	0.6	15	0.77951	1
B2RSH2_MOUSE,	-0.1	-0.4	0.3	17	-0.2	-0.5	0.2	26	0.1	-0.4	0.5	43	0.7805	1
PUR9_MOUSE,	1.4	1.1	1.8	21	1.4	1.1	1.7	28	0.1	-0.4	0.6	49	0.78245	1
DHSO_MOUSE,	1.4	0.9	1.8	9	1.3	0.8	1.7	11	0.1	-0.6	0.7	20	0.78486	1
PGP_MOUSE,	-0.1	-0.7	0.5	7	0	-0.5	0.6	9	-0.1	-0.9	0.7	16	0.7855	1
SH2B3_MOUSE,	-2.6	-3.4	-1.8	2	-2.8	-3.6	-2	2	0.2	-1	1.3	4	0.78585	1
NUDT9_MOUSE,	1.3	0.7	2	6	1.2	0.5	1.9	4	0.1	-0.8	1.1	10	0.787	1
NDUS3_MOUSE,	-0.4	-1.1	0.4	5	-0.2	-0.9	0.5	4	-0.1	-1.1	0.9	9	0.78831	1
SARNP_MOUSE,B2RXM7_MOUSE,B7ZWI2_MOUSE,	0.3	-0.6	1.1	3	0.4	-0.3	1.1	3	-0.1	-1.2	0.9	6	0.78871	1
Q5SQ25_MOUSE,S14L2_MOUSE,	-0.9	-1.6	-0.2	4	-0.8	-1.4	-0.2	6	-0.1	-1	0.8	10	0.78985	1
Q3UH39_MOUSE,CNTN2_MOUSE,Q3UGZ2_MOUSE,	-0.3	-1	0.5	5	-0.1	-0.9	0.7	4	-0.2	-1.3	1	9	0.79015	1
Q6P6I8_MOUSE,	0	-1.3	0.6	11	-0.3	-1	0.4	16	0.2	-1.2	1.2	27	0.79081	1
RB6I2_MOUSE,	0	-0.9	0.8	5	0.1	-0.6	0.8	4	-0.1	-1.3	0.9	9	0.79365	1
Q91VM5_MOUSE,	0.4	-0.1	0.8	11	0.4	0.1	0.8	15	-0.1	-0.6	0.5	26	0.79702	1
SYTC_MOUSE,Q3U630_MOUSE,	0.6	0	1.1	7	0.6	0.3	1	16	-0.1	-0.8	0.6	23	0.80005	1
Q3TF14_MOUSE,Q3U4D1_MOUSE,Q3U5U5_MOUSE,SAHH_MOUSE,	1.3	1	1.7	20	1.3	0.9	1.6	21	0.1	-0.4	0.5	41	0.80085	1
Q7TSZ3_MOUSE,SYLC_MOUSE,Q6ZPT2_MOUSE,	-0.9	-2.2	0.4	2	-0.7	-1.5	0.1	5	-0.2	-1.7	1.3	7	0.80111	1
PDIA3_MOUSE,	1	0.8	1.2	56	0.9	0.7	1.2	59	0.1	-0.2	0.3	115	0.80202	1
NPTX1_MOUSE,Q3UST4_MOUSE,A2ACL9_MOUSE,	0.5	-0.2	1.2	5	0.7	-0.2	1.5	3	-0.1	-1.2	0.9	8	0.80278	1
B7ZNL2_MOUSE,A2RSB1_MOUSE,Q8C1W9_MOUSE,NP1L4_MOUSE,	-0.2	-0.9	0.6	5	-0.1	-0.7	0.6	6	-0.1	-1.1	0.9	11	0.80321	1
A3KME3_MOUSE,KBTBB_MOUSE,	0.1	-1.1	1.2	2	0.2	-0.3	0.8	11	-0.2	-1.4	1.1	13	0.80373	1
NACAM_MOUSE,NACA_MOUSE,	-0.2	-1.1	0.7	3	-0.4	-1.1	0.3	5	0.1	-1	1.3	8	0.80382	1
CALM_MOUSE,Q3UKW2_MOUSE,	0.7	0	1.3	4	0.5	-0.2	1.3	3	0.1	-0.9	1.1	7	0.80406	1
CLIP2_MOUSE,	0	-0.3	0.3	34	0.1	-0.3	0.4	21	-0.1	-0.5	0.4	55	0.80635	1
KIF2A_MOUSE,	-1.1	-1.5	-0.7	15	-1	-1.4	-0.6	13	-0.1	-0.6	0.5	28	0.80873	1
A2AJH3_MOUSE,NMT2_MOUSE,Q3THR4_MOUSE,	-0.2	-1.1	0.7	2	0	-1.2	1.2	2	-0.2	-1.7	1.3	4	0.80887	1
AUHM_MOUSE,	-0.2	-0.6	0.2	14	-0.1	-0.6	0.3	11	-0.1	-0.6	0.5	25	0.81036	1
B1AX58_MOUSE,	-1.9	-2.4	-1.3	8	-1.8	-2.2	-1.3	10	-0.1	-0.8	0.7	18	0.8109	1
Q4VA29_MOUSE,CN166_MOUSE,	-0.3	-1.1	0.5	5	-0.4	-1.2	0.3	5	0.1	-1	1.2	10	0.81355	1
FRIH_MOUSE,	1.4	1	1.9	9	1.5	1.1	1.9	10	-0.1	-0.6	0.5	19	0.81367	1
Q8C6I5_MOUSE,	-1	-2.1	0	2	-0.9	-1.6	-0.2	4	-0.1	-1.3	1.1	6	0.81453	1
Q0PD38_MOUSE,RAB18_MOUSE,	-1.2	-2	-0.5	4	-1.1	-1.7	-0.5	5	-0.1	-1.1	0.8	9	0.81457	1
SFRS1_MOUSE,	0.9	0.5	1.3	10	0.8	0.5	1.2	17	0.1	-0.5	0.6	27	0.81636	1
Q543K9_MOUSE,PNPH_MOUSE,	0.2	-0.3	0.6	12	0.3	-0.2	0.7	14	-0.1	-0.7	0.5	26	0.81742	1
ARK72_MOUSE,A2AMV3_MOUSE,	-1.8	-2.6	-1	2	-1.7	-2.4	-1.1	3	-0.1	-1.1	0.9	5	0.81859	1
PDPR_MOUSE,	-0.7	-1.6	0.1	7	-0.9	-1.7	-0.1	6	0.1	-1	1.3	13	0.81906	1
WDR61_MOUSE,A0MNP4_MOUSE,	1.2	0.5	1.9	5	1.3	0.4	2.2	4	-0.1	-1.3	1	9	0.81915	1
PNPO_MOUSE,	1.1	0.2	2	2	1.2	0.3	2.1	2	-0.1	-1.5	1.1	4	0.81935	1
Q3UGR1_MOUSE,Q6A0C0_MOUSE,SAFB2_MOUSE,	0	-1	1.1	2	-0.1	-1	0.8	2	0.2	-1.2	1.5	4	0.82017	1
A2AG27_MOUSE,	-1.1	-2	-0.2	3	-1	-1.6	-0.4	6	-0.1	-1.2	1	9	0.82084	1
Q6PHZ1_MOUSE,RL17_MOUSE,Q6ZWZ7_MOUSE,Q80V08_MOUSE,Q505B1_MOUSE,	-1	-1.9	-0.1	3	-0.9	-1.5	-0.3	6	-0.1	-1.2	0.9	9	0.82101	1
NDUS7_MOUSE,	-0.5	-1.2	0.2	3	-0.4	-1	0.3	5	-0.1	-1.1	0.9	8	0.82178	1
TAGL3_MOUSE,	-0.4	-0.7	-0.1	28	-0.3	-0.6	-0.1	36	-0.1	-0.4	0.3	64	0.82223	1
Q544E3_MOUSE,PI42A_MOUSE,Q9CZS7_MOUSE,	-1.4	-2.2	-0.7	4	-1.3	-2	-0.7	4	-0.1	-1.1	0.9	8	0.82427	1
MA7D2_MOUSE,	1	0.5	1.5	8	1.1	0.5	1.6	5	-0.1	-0.8	0.6	13	0.82822	1
CPNE6_MOUSE,	0.3	-0.2	0.9	7	0.4	0	0.8	13	-0.1	-0.7	0.6	20	0.82886	1
RS7_MOUSE,Q4FZE6_MOUSE,	-1.4	-2.2	-0.7	3	-1.3	-2	-0.7	5	-0.1	-1.1	0.9	8	0.82891	1
TCPE_MOUSE,	-1	-1.8	-0.1	5	-0.9	-1.5	-0.3	5	-0.1	-1.1	0.9	10	0.83042	1
PP1R7_MOUSE,	-0.8	-1.3	-0.4	14	-0.8	-1.2	-0.3	11	-0.1	-0.7	0.5	25	0.83048	1
GSTP1_MOUSE,	1.3	1	1.6	36	1.2	0.9	1.5	26	0.1	-0.3	0.4	62	0.83182	1
Q4FJX4_MOUSE,CSRP1_MOUSE,	0	-0.4	0.4	11	0.1	-0.3	0.4	17	-0.1	-0.6	0.4	28	0.83225	1
NAGK_MOUSE,Q9D997_MOUSE,Q3U2G9_MOUSE,	1.7	1.1	2.3	7	1.7	1.2	2.5	8	-0.1	-1	0.7	15	0.83635	1
QORL2_MOUSE,	1.8	1	2.9	4	2	1.3	2.6	4	-0.1	-1.1	1.2	8	0.83639	1
SORCN_MOUSE,	0.3	-0.6	1.2	2	0.4	-0.4	1.2	3	-0.1	-1.4	1.1	5	0.8364	1
ACDSB_MOUSE,Q7TMY2_MOUSE,	-1.1	-2	-0.3	4	-1.2	-2.1	-0.4	4	0.1	-1.1	1.3	8	0.83794	1
DBNL_MOUSE,	0.3	-0.2	0.8	11	0.4	-0.1	0.9	15	-0.1	-0.7	0.6	26	0.83797	1
SNAG_MOUSE,	0.6	0.3	0.8	33	0.6	0.4	0.9	39	-0.1	-0.4	0.3	72	0.83851	1
Q3UA53_MOUSE,	-0.1	-0.8	0.5	7	-0.1	-0.5	0.3	17	-0.1	-0.8	0.7	24	0.84223	1
PPME1_MOUSE,	-2.3	-3	-1.7	5	-2.2	-2.9	-1.6	4	-0.1	-1	0.8	9	0.84277	1
Q66JR8_MOUSE,	0.8	0	1.6	2	0.7	0.2	1.2	8	0.1	-0.8	1	10	0.84587	1
Q6P1J1_MOUSE,	0.7	0.5	0.8	126	0.6	0.5	0.8	154	0.1	-0.2	0.3	280	0.84628	1
FSD1_MOUSE,	-1.3	-2.4	-0.3	2	-1.3	-2.5	-0.5	4	0.1	-1.3	1.6	6	0.84649	1
HNMT_MOUSE,A2AQK4_MOUSE,	-0.6	-1.8	0.7	2	-0.7	-1.5	0.1	3	0.1	-1.3	1.6	5	0.8495	1
Q3TF41_MOUSE,Q8BSH9_MOUSE,NP1L1_MOUSE,	-0.4	-1.3	0.5	4	-0.5	-1.5	0.5	3	0.1	-1.2	1.5	7	0.84966	1
SPSY_MOUSE,	0.1	-0.8	0.9	2	0.2	-0.9	1.3	2	-0.1	-1.5	1.3	4	0.85412	1
B1AW57_MOUSE,KCC1D_MOUSE,B1AW58_MOUSE,	-0.8	-1.7	0.2	2	-0.6	-1.4	0.1	2	-0.1	-1.4	1.1	4	0.85429	1
FUBP2_MOUSE,	-0.4	-0.8	0.1	13	-0.4	-0.9	0	13	0.1	-0.5	0.7	26	0.85455	1
UGGG1_MOUSE,	-1.5	-2.7	-0.4	2	-1.4	-1.9	-0.8	10	-0.1	-1.5	1.1	12	0.85541	1
NDUAA_MOUSE,	-0.5	-1.3	0.3	4	-0.4	-1.1	0.3	7	-0.1	-1.1	0.9	11	0.85632	1
NEUG_MOUSE,	-0.3	-0.7	0.1	12	-0.3	-0.7	0.2	11	-0.1	-0.7	0.5	23	0.85888	1
ADK_MOUSE,	0.6	0	1.2	7	0.5	0.1	1	12	0.1	-0.6	0.8	19	0.85905	1
Q3UJC3_MOUSE,NMT1_MOUSE,	0.4	-0.4	1.2	3	0.3	-0.5	1.1	4	0.1	-1	1.2	7	0.85929	1
Q8BQ46_MOUSE,Q3TLE4_MOUSE,	1.1	0.1	2	2	1.2	0.3	2	2	-0.1	-1.4	1.2	4	0.8594	1
PREP_MOUSE,	0.3	-0.4	1	5	0.2	-0.3	0.8	8	0.1	-0.8	1	13	0.86139	1
QORL1_MOUSE,	0.9	0.2	1.7	4	1	0.4	1.6	6	-0.1	-1	0.9	10	0.86396	1
Q9CWK0_MOUSE,RL14_MOUSE,	-2.3	-3.2	-1.4	3	-2.3	-3.1	-1.6	4	0.1	-1.1	1.2	7	0.86427	1
HNRPL_MOUSE,Q3UMT7_MOUSE,	-1.3	-2.1	-0.5	3	-1.2	-1.8	-0.6	5	-0.1	-1.1	0.9	8	0.86454	1
RAB6B_MOUSE,Q0PD53_MOUSE,	-1	-2.4	-0.1	4	-1	-1.8	-0.3	5	-0.1	-1.6	1.1	9	0.86579	1
PPID_MOUSE,	0.7	0.3	1.1	14	0.8	0.4	1.2	16	-0.1	-0.6	0.5	30	0.86652	1
RSSA_MOUSE,B2CY77_MOUSE,	-0.3	-0.8	0.1	11	-0.3	-0.7	0.1	15	-0.1	-0.6	0.5	26	0.8667	1
PSB2_MOUSE,A2A882_MOUSE,	1.2	0.8	1.5	15	1.1	0.7	1.6	10	0.1	-0.5	0.6	25	0.87263	1
Q6ZPF0_MOUSE,RAB1A_MOUSE,Q5SW88_MOUSE,Q3UB66_MOUSE,Q0PD67_MOUSE,	0.1	-0.2	0.5	18	0.2	-0.2	0.6	16	-0.1	-0.5	0.4	34	0.87383	1
Q8CGB9_MOUSE,	0	-1	1	3	0.1	-0.6	0.8	7	-0.1	-1.3	1.1	10	0.87857	1
TMOD2_MOUSE,	0.3	-0.1	0.7	14	0.3	-0.1	0.7	15	-0.1	-0.6	0.5	29	0.88136	1
A1L3B8_MOUSE,PSD7_MOUSE,	-0.9	-1.7	-0.1	4	-0.8	-1.5	-0.2	7	-0.1	-1.1	0.9	11	0.88145	1
Q53YU5_MOUSE,NOL3_MOUSE,Q8C550_MOUSE,Q8R2S3_MOUSE,	0.3	-0.3	1	5	0.2	-0.8	1.3	3	0.1	-1.1	1.3	8	0.88163	1
A2AWH6_MOUSE,ODPX_MOUSE,	-0.5	-1.3	0.3	3	-0.6	-1.4	0.2	3	0.1	-1	1.2	6	0.88215	1
A8DUQ5_MOUSE,A8DUK2_MOUSE,A8DUK4_MOUSE,A8DUQ1_MOUSE,A8DUN2_MOUSE,A8DUL2_MOUSE,A8DUK7_MOUSE,A8DUL0_MOUSE,A8DUL7_MOUSE,	2.1	1.3	2.8	6	2.2	1.1	3.1	5	-0.1	-1.3	1.4	11	0.88448	1
LIN7A_MOUSE,	-0.2	-0.8	0.4	8	-0.3	-0.8	0.2	11	0.1	-0.7	0.8	19	0.8845	1
C1QB_MOUSE,Q3U6I5_MOUSE,Q3U793_MOUSE,	1.4	0.7	2.1	4	1.3	0.8	1.8	9	0.1	-0.8	0.9	13	0.88468	1
LXN_MOUSE,Q14BZ3_MOUSE,	-0.9	-1.9	0.1	3	-0.8	-1.6	0.1	4	-0.1	-1.5	1.2	7	0.88535	1
A2AE04_MOUSE,EIF3I_MOUSE,	1	0.1	1.9	2	0.9	0.3	1.5	6	0.1	-1	1.1	8	0.88569	1
STIP1_MOUSE,Q3THQ5_MOUSE,	1	0.7	1.2	57	0.9	0.7	1.1	66	0.1	-0.2	0.4	123	0.89109	1
GMPPA_MOUSE,Q3UNC0_MOUSE,	1.1	0.1	2.2	3	1	0.2	2	3	0.1	-1.3	1.5	6	0.89534	1
IDHP_MOUSE,	0.8	0.5	1.1	24	0.7	0.4	1	26	0.1	-0.4	0.5	50	0.89635	1
PCLO_MOUSE,	-1.2	-2	-0.3	5	-1.1	-1.9	-0.2	3	-0.1	-1.3	1.2	8	0.89636	1
Q3U1S6_MOUSE,CSDE1_MOUSE,	-1.1	-1.7	-0.4	6	-1	-1.5	-0.5	9	-0.1	-0.9	0.7	15	0.89834	1
DPYL3_MOUSE,Q3TT92_MOUSE,	0.6	0.4	0.8	74	0.6	0.4	0.8	77	0.1	-0.2	0.3	151	0.89989	1
PSA7_MOUSE,Q3TN31_MOUSE,Q542H2_MOUSE,	1.2	0.9	1.5	23	1.1	0.8	1.4	25	0.1	-0.4	0.5	48	0.90004	1
MARCS_MOUSE,	1.5	1.2	1.9	17	1.5	1.1	1.8	17	0.1	-0.4	0.5	34	0.90186	1
UCHL3_MOUSE,	-1.2	-2	-0.3	3	-1.2	-2.3	-0.2	2	0.1	-1.3	1.5	5	0.90282	1
Q5BKQ9_MOUSE,Q7TMI0_MOUSE,Q8BK73_MOUSE,Q3UWW9_MOUSE,PSD11_MOUSE,Q497E8_MOUSE,	-0.4	-1.3	0.6	4	-0.3	-1.1	0.5	4	-0.1	-1.3	1.1	8	0.90981	1
MAT2B_MOUSE,	0.5	-0.2	1.2	5	0.5	-0.3	1.2	6	0.1	-0.9	1.1	11	0.91661	1
Q3TMB8_MOUSE,Q8VCD4_MOUSE,PUR8_MOUSE,	0.6	-0.3	1.5	4	0.7	-0.1	1.5	4	-0.1	-1.2	1.1	8	0.91802	1
ARP3B_MOUSE,	-0.2	-0.6	0.2	17	-0.2	-0.5	0.2	22	-0.1	-0.5	0.4	39	0.91923	1
DHRS4_MOUSE,Q3UIB5_MOUSE,	0.9	-0.2	2.1	2	0.9	0.1	1.6	7	0.1	-1.3	1.5	9	0.92029	1
Q3TG75_MOUSE,OAT_MOUSE,	0.9	0.5	1.3	14	0.8	0.5	1.2	19	0.1	-0.5	0.6	33	0.92511	1
GNPI2_MOUSE,	1	0.5	1.5	10	1.1	0.6	1.5	10	-0.1	-0.7	0.6	20	0.92858	1
Q8CIJ3_MOUSE,EIF3B_MOUSE,	-0.4	-1.2	0.3	5	-0.5	-1.1	0.1	8	0.1	-0.9	1	13	0.9342	1
EF1B_MOUSE,	1	0.2	1.7	3	0.9	0.1	1.7	4	0.1	-1	1.1	7	0.93622	1
A1A4A7_MOUSE,B7ZNW0_MOUSE,PGAM5_MOUSE,	0.9	0	1.8	2	1	0.1	1.9	2	-0.1	-1.3	1.2	4	0.9424	1
ACADM_MOUSE,Q91WS8_MOUSE,	0.8	0.1	1.5	5	0.8	0	1.6	4	-0.1	-1.1	1	9	0.94477	1
Q9DCC5_MOUSE,CBX3_MOUSE,	0.6	-0.1	1.3	4	0.5	-0.1	1.1	6	0.1	-0.9	1	10	0.95741	1
Q3UVV3_MOUSE,Q5SYH5_MOUSE,OMGP_MOUSE,	-0.2	-0.7	0.3	8	-0.2	-0.7	0.4	7	-0.1	-0.8	0.7	15	0.95815	1
Q3TQZ7_MOUSE,Q80W80_MOUSE,Q80W82_MOUSE,Q78GB8_MOUSE,Q80W81_MOUSE,MK10_MOUSE,Q8C9D4_MOUSE,	-0.6	-1.3	0.1	4	-0.6	-1.2	-0.1	5	0.1	-0.8	0.9	9	0.96556	1
Q5SS40_MOUSE,1433E_MOUSE,	0.1	-0.1	0.3	85	0.1	-0.1	0.3	94	0	-0.2	0.2	179	1	1
A3KML3_MOUSE,1433T_MOUSE,	0.4	0.2	0.6	75	0.4	0.2	0.6	65	0	-0.2	0.3	140	1	1
1433Z_MOUSE,	0.5	0.3	0.6	181	0.4	0.3	0.6	151	0	-0.2	0.2	332	1	1
A2AE27_MOUSE,	0.4	-0.3	1.2	6	0.5	-0.2	1.1	6	0	-1	1	12	1	1
A2AMV7_MOUSE,Q923G3_MOUSE,A2AMW0_MOUSE,	-0.5	-0.8	-0.2	24	-0.5	-0.8	-0.2	24	0	-0.4	0.4	48	1	1
IVD_MOUSE,A3KGG9_MOUSE,	0.9	0.5	1.3	18	0.9	0.6	1.2	28	0	-0.5	0.5	46	1	1
TOLIP_MOUSE,A6PWS1_MOUSE,	0	-0.8	0.7	5	0	-0.6	0.5	8	0	-0.9	0.9	13	1	1
ACTZ_MOUSE,	-0.1	-0.6	0.4	8	-0.1	-0.5	0.4	11	0	-0.7	0.7	19	1	1
ADDB_MOUSE,Q8C0Y2_MOUSE,	-0.5	-0.8	-0.2	38	-0.4	-0.7	-0.2	29	0	-0.4	0.3	67	1	1
Q6P5I3_MOUSE,ADHX_MOUSE,	1.2	0.8	1.6	13	1.2	0.8	1.6	15	0	-0.6	0.5	28	1	1
AN32A_MOUSE,	0.6	0.2	1.1	14	0.7	0.3	1	15	0	-0.6	0.5	29	1	1
ANK2_MOUSE,	-1	-1.3	-0.7	40	-0.9	-1.2	-0.7	45	0	-0.4	0.3	85	1	1
ANXA5_MOUSE,	-0.4	-0.7	-0.1	28	-0.5	-0.7	-0.2	31	0	-0.3	0.4	59	1	1
Q5SW83_MOUSE,ARP2_MOUSE,	0	-0.2	0.3	31	0	-0.2	0.3	31	0	-0.4	0.4	62	1	1
ARPC2_MOUSE,	0.2	-0.1	0.4	36	0.2	-0.1	0.4	35	0	-0.4	0.3	71	1	1
A2A5Y6_MOUSE,TAU_MOUSE,B1AQW3_MOUSE,Q3UH19_MOUSE,	0.8	0.6	1	75	0.8	0.6	1	72	0	-0.3	0.2	147	1	1
AUXI_MOUSE,B1AYC5_MOUSE,	-0.7	-1.3	-0.2	7	-0.8	-1.2	-0.3	9	0	-0.7	0.7	16	1	1
LANC1_MOUSE,B2KGR1_MOUSE,	1.4	1	1.7	18	1.4	1.1	1.7	23	0	-0.5	0.4	41	1	1
B2RXT3_MOUSE,	-0.9	-1.1	-0.7	61	-0.9	-1.1	-0.6	52	0	-0.3	0.3	113	1	1
CNTN1_MOUSE,	0.2	0	0.4	74	0.1	-0.1	0.3	72	0	-0.2	0.3	146	1	1
Q544Y7_MOUSE,COF1_MOUSE,	-0.1	-0.7	0.5	6	0	-0.6	0.6	5	0	-0.9	0.8	11	1	1
CORO7_MOUSE,	-1.9	-2.8	-0.9	2	-1.8	-2.8	-1.1	4	0	-1.3	1.4	6	1	1
CPSF5_MOUSE,	0	-0.8	0.9	3	0	-0.6	0.7	6	0	-1	1	9	1	1
Q8BPF9_MOUSE,CSK22_MOUSE,Q545V8_MOUSE,	-0.3	-0.7	0.2	10	-0.3	-0.8	0.2	10	0	-0.7	0.7	20	1	1
DDB1_MOUSE,	1	0.5	1.4	21	0.9	0.7	1.2	39	0	-0.5	0.5	60	1	1
DHSA_MOUSE,	1.3	1.1	1.6	37	1.3	1.1	1.5	42	0	-0.3	0.3	79	1	1
DPYL1_MOUSE,	0.7	0.6	0.9	123	0.7	0.5	0.8	152	0	-0.2	0.3	275	1	1
DPYL2_MOUSE,	0.7	0.6	0.9	346	0.7	0.6	0.9	341	0	-0.2	0.2	687	1	1
Q8K239_MOUSE,EFTS_MOUSE,Q3TA37_MOUSE,	-0.4	-1	0.3	5	-0.3	-1	0.4	4	0	-1	0.9	9	1	1
ERP29_MOUSE,	0.4	-0.2	1	6	0.4	0	0.9	11	0	-0.7	0.7	17	1	1
FKBP4_MOUSE,	0	-0.7	0.7	5	0	-0.7	0.6	6	0	-0.9	1	11	1	1
Q3UIA9_MOUSE,FUMH_MOUSE,	0.8	0.5	1	46	0.8	0.5	1	47	0	-0.3	0.3	93	1	1
GHC1_MOUSE,	0.5	-0.1	1.1	5	0.5	0	0.9	12	0	-0.7	0.8	17	1	1
GNAI3_MOUSE,Q3TJH1_MOUSE,	-0.2	-0.7	0.4	6	-0.2	-0.7	0.3	8	0	-0.7	0.7	14	1	1
GRHPR_MOUSE,Q3T9Z2_MOUSE,	0.8	0.2	1.3	10	0.7	0.3	1.1	16	0	-0.6	0.7	26	1	1
GSTA4_MOUSE,	1.8	1.4	2.2	11	1.8	1.4	2.1	14	0	-0.5	0.5	25	1	1
GSTK1_MOUSE,	0.2	-0.4	0.9	6	0.3	-0.4	0.9	7	0	-0.9	0.9	13	1	1
Q8C1Y3_MOUSE,H10_MOUSE,Q3U4Y0_MOUSE,	0.9	0.6	1.2	36	0.9	0.6	1.2	25	0	-0.4	0.4	61	1	1
H14_MOUSE,	0.9	0.7	1.1	68	0.9	0.7	1.1	66	0	-0.3	0.3	134	1	1
HDGR3_MOUSE,	0.8	0.3	1.4	9	0.8	0.2	1.4	5	0	-0.7	0.8	14	1	1
HEBP1_MOUSE,	0.8	0.3	1.3	8	0.8	0.4	1.2	11	0	-0.7	0.6	19	1	1
Q9DD05_MOUSE,HEM2_MOUSE,	0.9	0.4	1.4	10	0.9	0.4	1.4	9	0	-0.6	0.7	19	1	1
HIBCH_MOUSE,	-0.3	-0.7	0.2	11	-0.2	-0.6	0.2	13	0	-0.7	0.6	24	1	1
HNRPD_MOUSE,	0.1	-0.2	0.4	16	0.1	-0.2	0.4	19	0	-0.5	0.4	35	1	1
HPLN1_MOUSE,	1	0.7	1.3	22	1	0.6	1.4	14	0	-0.5	0.5	36	1	1
IDH3A_MOUSE,	0.1	-0.1	0.3	59	0.1	-0.1	0.3	65	0	-0.3	0.3	124	1	1
IPYR2_MOUSE,	0.6	0.2	1.1	13	0.6	0.2	1	13	0	-0.5	0.6	26	1	1
IPYR_MOUSE,Q4FK49_MOUSE,	-0.1	-0.6	0.4	9	-0.1	-0.5	0.3	18	0	-0.6	0.6	27	1	1
KCAB2_MOUSE,	-0.6	-1.3	0.1	4	-0.6	-1.2	0	5	0	-0.9	0.9	9	1	1
KCY_MOUSE,	-0.2	-0.6	0.2	14	-0.2	-0.5	0.2	18	0	-0.5	0.5	32	1	1
B1ATT5_MOUSE,KT3K_MOUSE,	-0.9	-1.5	-0.4	4	-0.9	-1.6	-0.1	3	0	-1	0.9	7	1	1
LDHB_MOUSE,	0.4	0.2	0.6	107	0.4	0.2	0.6	98	0	-0.2	0.2	205	1	1
MAP6_MOUSE,	0.2	0	0.4	113	0.2	0	0.4	106	0	-0.2	0.2	219	1	1
Q2UZW7_MOUSE,MARE3_MOUSE,	-0.5	-1	-0.1	12	-0.5	-1	-0.1	10	0	-0.6	0.6	22	1	1
Q3UF82_MOUSE,MK01_MOUSE,	-0.2	-0.6	0.2	12	-0.2	-0.5	0.1	18	0	-0.5	0.5	30	1	1
MPI_MOUSE,Q3V100_MOUSE,Q921Z9_MOUSE,	-1.4	-2.4	-0.3	2	-1.4	-2.3	-0.4	3	0	-1.4	1.6	5	1	1
NCAN_MOUSE,	1.1	0.9	1.3	58	1.1	0.9	1.3	49	0	-0.3	0.3	107	1	1
NDUV2_MOUSE,	0.5	-0.3	1.3	3	0.5	-0.4	1.4	2	0	-1.2	1.2	5	1	1
NRCAM_MOUSE,	-0.3	-0.5	0	34	-0.2	-0.5	0.1	29	0	-0.4	0.3	63	1	1
NRDC_MOUSE,Q8R320_MOUSE,A2A9Q2_MOUSE,A2A9Q1_MOUSE,A6PWC3_MOUSE,	1.1	0.5	1.6	11	1.1	0.2	2	4	0	-1	1	15	1	1
NUDT3_MOUSE,	-0.4	-1	0.2	4	-0.4	-0.9	0.2	6	0	-0.9	0.8	10	1	1
ODO1_MOUSE,	-0.5	-0.7	-0.3	69	-0.5	-0.7	-0.3	76	0	-0.3	0.2	145	1	1
Q543Y7_MOUSE,PACN1_MOUSE,	0.2	0	0.4	60	0.3	0	0.5	64	0	-0.3	0.2	124	1	1
B9EIC7_MOUSE,PHYIP_MOUSE,	-1.3	-1.7	-0.9	11	-1.3	-1.7	-1	16	0	-0.5	0.5	27	1	1
PI51C_MOUSE,	-1.9	-2.6	-1.2	4	-1.8	-2.7	-1.2	5	0	-1	1.1	9	1	1
PP1A_MOUSE,	-0.3	-0.5	0	41	-0.3	-0.5	0	41	0	-0.3	0.3	82	1	1
PPGB_MOUSE,Q544R6_MOUSE,Q9D2D1_MOUSE,	1.7	0.9	2.6	4	1.7	0.9	2.4	4	0	-1.1	1.1	8	1	1
PPP6_MOUSE,	0.8	0.2	1.3	7	0.8	0.2	1.4	8	0	-0.8	0.7	15	1	1
B1AXW7_MOUSE,PRDX1_MOUSE,	-0.4	-0.6	-0.1	37	-0.4	-0.7	-0.1	27	0	-0.3	0.4	64	1	1
PSA4_MOUSE,	1.2	0.9	1.5	25	1.2	0.8	1.5	20	0	-0.4	0.5	45	1	1
PSB4_MOUSE,	1.2	0.9	1.5	23	1.2	0.8	1.5	20	0	-0.4	0.4	43	1	1
PSB5_MOUSE,	1.2	0.9	1.5	25	1.2	1	1.4	38	0	-0.4	0.3	63	1	1
PUR4_MOUSE,	-0.8	-1.5	-0.2	5	-0.8	-1.3	-0.3	10	0	-0.8	0.8	15	1	1
PURA1_MOUSE,Q3UBP0_MOUSE,	-0.5	-1.1	0.2	5	-0.5	-1	0.1	8	0	-0.8	0.8	13	1	1
PYC_MOUSE,Q3T9S7_MOUSE,Q3TCQ3_MOUSE,	-2.6	-2.9	-2.4	47	-2.6	-2.8	-2.4	50	0	-0.3	0.3	97	1	1
PYGM_MOUSE,	-0.3	-0.5	0	43	-0.3	-0.5	0	48	0	-0.3	0.4	91	1	1
Q3TIJ1_MOUSE,Q14AI7_MOUSE,CSN4_MOUSE,	-0.4	-1.1	0.3	6	-0.3	-0.9	0.2	11	0	-0.9	0.8	17	1	1
Q14BH8_MOUSE,	1.2	0.9	1.5	37	1.2	1	1.5	38	0	-0.4	0.3	75	1	1
Q3UY19_MOUSE,Q2KHL7_MOUSE,ICAM5_MOUSE,	-0.3	-0.8	0.3	9	-0.3	-0.8	0.3	7	0	-0.8	0.8	16	1	1
IF4H_MOUSE,Q564E5_MOUSE,Q3V244_MOUSE,Q3TG58_MOUSE,	0.6	0.2	1.1	9	0.6	0.1	1.1	7	0	-0.6	0.6	16	1	1
Q3TKR5_MOUSE,	-0.2	-0.6	0.3	13	-0.2	-0.5	0.2	15	0	-0.6	0.6	28	1	1
GBB1_MOUSE,Q3TQ70_MOUSE,	-0.2	-0.4	0.1	29	-0.2	-0.4	0.1	29	0	-0.4	0.4	58	1	1
Q3TWN8_MOUSE,Q8BGM2_MOUSE,P5CS_MOUSE,	-1.3	-2.2	-0.5	3	-1.3	-2	-0.7	4	0	-1.1	1.1	7	1	1
Q3TI61_MOUSE,Q3TIP0_MOUSE,Q3TKV1_MOUSE,Q3TW71_MOUSE,Q3TXV1_MOUSE,PSMD2_MOUSE,	-0.1	-0.5	0.3	14	-0.1	-0.7	0.4	12	0	-0.6	0.7	26	1	1
Q8CAJ7_MOUSE,Q3TVK3_MOUSE,Q56A00_MOUSE,Q3U3I6_MOUSE,	0.7	0.2	1.2	10	0.7	0.1	1.2	10	0	-0.7	0.8	20	1	1
Q3U7F3_MOUSE,Q3TIK8_MOUSE,Q3UK83_MOUSE,Q5EBP8_MOUSE,ROA1_MOUSE,	0.2	-0.1	0.5	27	0.2	0	0.5	26	0	-0.4	0.3	53	1	1
Q3U8U8_MOUSE,Q99L36_MOUSE,Q8BN32_MOUSE,PABP1_MOUSE,	-0.5	-1	0	13	-0.5	-0.9	-0.1	19	0	-0.6	0.6	32	1	1
GBB2_MOUSE,Q3U9V4_MOUSE,	-0.1	-0.4	0.2	26	-0.2	-0.5	0.1	25	0	-0.4	0.4	51	1	1
Q3UBU9_MOUSE,FKBP3_MOUSE,	0.4	-0.5	1.4	3	0.5	-0.1	1	7	0	-1.1	1.1	10	1	1
ALDR_MOUSE,Q3UDY1_MOUSE,Q5U415_MOUSE,	-0.1	-0.4	0.3	15	-0.1	-0.4	0.3	18	0	-0.5	0.5	33	1	1
Q3UCH0_MOUSE,Q3UFI4_MOUSE,RL6_MOUSE,	-2	-2.5	-1.4	5	-2	-2.4	-1.5	10	0	-0.7	0.7	15	1	1
Q3UHH0_MOUSE,AT2B2_MOUSE,Q3UHJ3_MOUSE,	-2.6	-3.2	-2	6	-2.6	-3.1	-2.1	15	0	-0.7	0.8	21	1	1
Q3UEJ7_MOUSE,Q3UJ34_MOUSE,ASSY_MOUSE,	0.3	-0.6	1.2	3	0.3	-0.4	1	6	0	-1.1	1.1	9	1	1
PAIRB_MOUSE,Q3UJK2_MOUSE,	0.5	-0.1	1.2	5	0.5	0	1	8	0	-0.8	0.8	13	1	1
SIRT2_MOUSE,Q3UJK6_MOUSE,	0.2	-0.4	0.8	7	0.2	-0.5	0.9	5	0	-0.9	0.9	12	1	1
Q3UQ71_MOUSE,HYES_MOUSE,	0.2	-0.9	1.4	2	0.3	-0.6	1	4	0	-1.4	1.4	6	1	1
Q3URG1_MOUSE,TPPP_MOUSE,	0.8	0.6	1	64	0.8	0.6	1	43	0	-0.3	0.3	107	1	1
A2AEG8_MOUSE,Q3US81_MOUSE,	-1.6	-2.4	-0.8	3	-1.7	-2.5	-0.7	4	0	-1.3	1.3	7	1	1
NSF1C_MOUSE,Q3UVN5_MOUSE,	0.2	-0.3	0.6	14	0.2	-0.3	0.6	11	0	-0.6	0.6	25	1	1
Q91V78_MOUSE,CD81_MOUSE,Q3UWG5_MOUSE,	-0.9	-1.8	0	3	-0.9	-1.9	0.1	2	0	-1.3	1.3	5	1	1
Q3UWU7_MOUSE,DIRA2_MOUSE,	-2.4	-3	-1.9	7	-2.5	-3	-1.9	7	0	-0.7	0.8	14	1	1
LKHA4_MOUSE,Q3UY71_MOUSE,	0.6	0.3	1	19	0.7	0.4	0.9	40	0	-0.5	0.4	59	1	1
Q4FJQ0_MOUSE,RAB7A_MOUSE,	-0.2	-0.7	0.3	9	-0.2	-0.6	0.2	16	0	-0.6	0.6	25	1	1
SPB6_MOUSE,Q3U3L3_MOUSE,Q4FJQ6_MOUSE,	0.7	-0.2	1.6	4	0.7	0.2	1.2	8	0	-1	1	12	1	1
CBPE_MOUSE,Q543R4_MOUSE,	0.9	-0.1	2	2	0.9	0.2	1.6	5	0	-1.2	1.3	7	1	1
Q543S2_MOUSE,GNAO_MOUSE,	-0.5	-0.7	-0.2	40	-0.5	-0.7	-0.3	44	0	-0.3	0.3	84	1	1
Q547J4_MOUSE,	0.8	0.6	1	76	0.8	0.6	1	71	0	-0.3	0.2	147	1	1
DCE2_MOUSE,Q548L4_MOUSE,	0.7	0.3	1.2	9	0.7	0.3	1.1	12	0	-0.6	0.6	21	1	1
FUS_MOUSE,Q8CFQ9_MOUSE,Q3USY4_MOUSE,Q564D0_MOUSE,	0.6	0.2	1	12	0.7	0.3	1.1	11	0	-0.6	0.5	23	1	1
Q8BSH3_MOUSE,Q564G1_MOUSE,TPM1_MOUSE,Q545Y3_MOUSE,	1	0.8	1.3	28	1	0.7	1.3	26	0	-0.4	0.4	54	1	1
Q58E70_MOUSE,	1.1	0.8	1.3	53	1.1	0.8	1.3	50	0	-0.3	0.3	103	1	1
Q5DQJ3_MOUSE,Q3UBZ3_MOUSE,CAZA2_MOUSE,	-0.5	-0.9	-0.2	22	-0.6	-0.9	-0.2	21	0	-0.4	0.5	43	1	1
Q91WK9_MOUSE,Q5EBQ7_MOUSE,MSRA_MOUSE,	0.4	-0.4	1.2	5	0.4	-0.3	1.1	5	0	-1	1.1	10	1	1
Q5J7N1_MOUSE,	-0.3	-1	0.4	4	-0.2	-0.8	0.4	5	0	-1	0.9	9	1	1
Q3UAS2_MOUSE,CAZA1_MOUSE,Q3UJV2_MOUSE,Q5RKN9_MOUSE,	-0.4	-0.9	0.2	7	-0.3	-0.9	0.3	7	0	-0.8	0.7	14	1	1
A2BE93_MOUSE,Q5U445_MOUSE,SET_MOUSE,Q3T9S3_MOUSE,	0.5	-0.2	1.1	3	0.5	-0.1	1.1	4	0	-0.9	0.9	7	1	1
Q640L9_MOUSE,Q9D8S5_MOUSE,SFRS5_MOUSE,	0.5	-0.4	1.4	3	0.5	-0.3	1.3	3	0	-1.2	1.2	6	1	1
A1L0X5_MOUSE,Q0VDN0_MOUSE,Q0VDM9_MOUSE,Q6IFT3_MOUSE,	6.7	6.3	7	17	6.6	6	7	17	0	-0.5	0.7	34	1	1
PP1G_MOUSE,Q3U7K1_MOUSE,Q6ZWM8_MOUSE,	-0.2	-0.5	0	37	-0.2	-0.5	0	40	0	-0.3	0.4	77	1	1
Q7TSZ0_MOUSE,	-0.9	-1.2	-0.7	35	-0.9	-1.1	-0.7	43	0	-0.4	0.3	78	1	1
Q80WT7_MOUSE,	0.5	0.3	0.8	53	0.5	0.3	0.8	53	0	-0.4	0.3	106	1	1
CAD13_MOUSE,Q8BG11_MOUSE,Q8VDK4_MOUSE,	0.6	-0.2	1.3	3	0.6	0	1.2	5	0	-1	0.9	8	1	1
Q8BIV6_MOUSE,	1	0.3	1.6	6	0.9	0.4	1.5	7	0	-0.8	0.8	13	1	1
Q8C0E9_MOUSE,	-1.7	-2	-1.3	13	-1.6	-2	-1.3	13	0	-0.5	0.5	26	1	1
Q8C845_MOUSE,	-0.4	-0.7	-0.1	27	-0.4	-0.7	-0.1	22	0	-0.4	0.4	49	1	1
Q8QZV3_MOUSE,	0.6	0	1.1	6	0.5	0	1.1	9	0	-0.7	0.8	15	1	1
Q8R436_MOUSE,GSHB_MOUSE,Q541E2_MOUSE,Q3TWM2_MOUSE,	0.9	0.2	1.6	5	0.8	0.3	1.4	7	0	-0.8	0.9	12	1	1
A2BH07_MOUSE,Q8VC94_MOUSE,RL11_MOUSE,	-2.6	-3.3	-1.9	3	-2.5	-3.2	-1.9	3	0	-1	0.9	6	1	1
Q91VA7_MOUSE,	-0.2	-0.5	0	39	-0.3	-0.5	0	43	0	-0.3	0.4	82	1	1
Q5SX22_MOUSE,Q6NZC5_MOUSE,Q3TH47_MOUSE,Q8VC46_MOUSE,Q78XY9_MOUSE,Q922B0_MOUSE,A5JUZ1_MOUSE,Q8R0Z9_MOUSE,Q8C2K3_MOUSE,Q66JP1_MOUSE,UBIQ_MOUSE,Q922Z8_MOUSE,Q642L7_MOUSE,	0	-0.4	0.3	29	-0.1	-0.4	0.2	31	0	-0.4	0.4	60	1	1
Q99L15_MOUSE,ACOT1_MOUSE,	0.5	-0.4	1.4	2	0.5	-0.4	1.5	2	0	-1.3	1.3	4	1	1
Q9D096_MOUSE,ISOC1_MOUSE,	1.4	0.7	2.2	4	1.4	0.8	2	8	0	-1	1	12	1	1
Q9R1N4_MOUSE,	1.4	0.9	1.8	14	1.3	1	1.7	15	0	-0.5	0.6	29	1	1
RAB2A_MOUSE,Q0PD65_MOUSE,	0.1	-0.3	0.5	14	0.2	-0.3	0.6	13	0	-0.6	0.5	27	1	1
Q0PD49_MOUSE,RAB8B_MOUSE,	0.1	-0.4	0.6	6	0.1	-0.4	0.7	6	0	-0.8	0.7	12	1	1
RL23A_MOUSE,Q5M9M5_MOUSE,Q4V9X9_MOUSE,	-0.1	-0.5	0.3	12	-0.2	-0.6	0.3	8	0	-0.6	0.7	20	1	1
Q5M8M8_MOUSE,RL29_MOUSE,	0.1	-0.5	0.5	12	0.1	-0.3	0.5	10	0	-0.7	0.6	22	1	1
Q8C671_MOUSE,A2AA29_MOUSE,SFRS2_MOUSE,	0.8	0.1	1.4	3	0.8	0.2	1.3	6	0	-0.9	0.9	9	1	1
A2AWI7_MOUSE,SHLB2_MOUSE,	-0.6	-1.7	0.6	2	-0.5	-1.2	0.1	5	0	-1.3	1.3	7	1	1
A2APW8_MOUSE,SNAB_MOUSE,	0.1	-0.1	0.3	67	0.2	-0.1	0.4	66	0	-0.3	0.2	133	1	1
Q8BSZ8_MOUSE,SPEE_MOUSE,Q3UJL7_MOUSE,Q543H0_MOUSE,	-1.4	-2.4	-0.5	2	-1.4	-2	-0.8	5	0	-1.1	1.1	7	1	1
SYN1_MOUSE,	-0.9	-1.1	-0.7	106	-0.9	-1.1	-0.7	106	0	-0.2	0.2	212	1	1
SYN2_MOUSE,	0.3	0.1	0.6	50	0.3	0.1	0.6	53	0	-0.3	0.3	103	1	1
TAGL2_MOUSE,	-0.2	-1	0.5	3	-0.2	-0.7	0.3	8	0	-0.9	0.9	11	1	1
TCTP_MOUSE,	-0.8	-1.3	-0.4	10	-0.9	-1.4	-0.3	5	0	-0.7	0.7	15	1	1
THEM4_MOUSE,	-1	-1.8	-0.1	3	-1	-1.8	-0.2	4	0	-1.1	1.2	7	1	1
THOC4_MOUSE,	0.3	-0.2	0.8	8	0.3	-0.2	0.8	9	0	-0.7	0.7	17	1	1
THOP1_MOUSE,	-1.1	-1.8	-0.5	8	-1.1	-1.7	-0.4	6	0	-1	0.9	14	1	1
Q545S0_MOUSE,THTR_MOUSE,	-1	-1.4	-0.5	11	-1	-1.4	-0.6	13	0	-0.6	0.6	24	1	1
TKT_MOUSE,	1	0.8	1.2	88	1	0.8	1.2	80	0	-0.2	0.2	168	1	1
TOM34_MOUSE,	1.2	0.8	1.6	15	1.2	0.8	1.6	13	0	-0.6	0.6	28	1	1
TPM3_MOUSE,	1	0.8	1.3	41	1	0.7	1.3	33	0	-0.3	0.4	74	1	1
UBA1_MOUSE,B9EHN0_MOUSE,	-0.9	-1.1	-0.7	67	-0.9	-1.1	-0.7	86	0	-0.3	0.2	153	1	1
UCHL1_MOUSE,	0.8	0.6	1	64	0.8	0.5	1	49	0	-0.2	0.3	113	1	1
VISL1_MOUSE,Q4W4C9_MOUSE,	-0.2	-0.5	0.2	19	-0.2	-0.5	0.2	15	0	-0.5	0.5	34	1	1

## Sheet: BLA-membrane-associated fract.
Group	14N shocked/15N reference				14N control/15N reference				14N shocked/14N control
Uniprot ID	log2ratio	lowerCI	upperCI	# of quantified peptides	log2ratio	lowerCI	upperCI	# of quantified peptides	log2ratio	lowerCI	upperCI	# of quantified peptides identified	p-value	adjusted p-value
MDHM_MOUSE,	-2.8	-3	-2.6	34	-2.1	-2.4	-1.9	25	-0.7	-1	-0.3	59	1.7957e-05	0.0244215
CTBP1_MOUSE,	1.8	1.3	2.4	6	5.6	5	6.1	11	-3.7	-4.5	-2.9	17	9.5183e-05	0.0647244
ACON_MOUSE,	-2.3	-2.6	-2	25	-1.7	-2	-1.4	28	-0.6	-1	-0.2	53	0.00042521	0.192762
PHIPL_MOUSE,	4	3.2	4.9	4	1.1	0.2	1.9	4	3	1.6	4.3	8	0.00074226	0.252368
MACF1_MOUSE,B1ARU3_MOUSE,B1ARU4_MOUSE,Q4PLL5_MOUSE,	3.5	2.9	4.2	3	0.1	-0.9	1	2	3.4	2.3	4.6	5	0.00094343	0.256613
Q80U89_MOUSE,CLH_MOUSE,	0.7	0.6	0.8	355	0.8	0.7	1	386	-0.1	-0.3	0	741	0.0014995	0.339887
FAM5B_MOUSE,	-3.8	-4.6	-3	3	-0.4	-1.4	0.6	2	-3.4	-4.7	-2.1	5	0.0032335	0.628223
VAMP1_MOUSE,Q9CXX2_MOUSE,	-1.6	-2.2	-1	10	-0.5	-1	0	10	-1.1	-1.8	-0.3	20	0.0049571	0.8147
Q8VG79_MOUSE,	3.8	3.3	4.2	10	2.5	1.7	3.3	2	1.3	0.3	2.2	12	0.0053914	0.8147
Q9QZ83_MOUSE,	1.6	1.4	1.7	103	1.8	1.6	2	112	-0.2	-0.5	0	215	0.0074767	0.960725
AP2B1_MOUSE,Q5SWR1_MOUSE,	0.5	0.4	0.7	116	0.7	0.6	0.9	133	-0.2	-0.4	0	249	0.008176	0.960725
SYN1_MOUSE,	2.2	2	2.4	79	2.4	2.2	2.6	81	-0.3	-0.5	0	160	0.0087522	0.960725
P97869_MOUSE,	0.1	-0.5	0.7	9	1.1	0.5	1.8	9	-1.1	-1.9	-0.2	18	0.0091834	0.960725
Q3TT11_MOUSE,DHB4_MOUSE,Q3UHW2_MOUSE,	1.4	0.8	2	14	2.7	1.9	3.8	12	-1.3	-2.5	-0.2	26	0.012688	1
AATM_MOUSE,	-3	-3.4	-2.6	12	-2.4	-2.8	-2.1	14	-0.6	-1	-0.1	26	0.014106	1
VATA_MOUSE,	3.2	3	3.4	80	2.9	2.7	3.2	82	0.3	0	0.6	162	0.016124	1
Q99KF5_MOUSE,B1B0W8_MOUSE,HPRT_MOUSE,	4.5	3.7	5.2	5	5.8	5	6.6	4	-1.3	-2.5	-0.2	9	0.016763	1
Q80TN1_MOUSE,KCC2A_MOUSE,	-1.2	-1.3	-1	212	-1	-1.1	-0.9	204	-0.2	-0.3	0	416	0.017131	1
MK03_MOUSE,	2.2	1.9	2.5	27	2.6	2.4	2.9	25	-0.4	-0.8	0	52	0.017491	1
NCDN_MOUSE,	0.3	0.1	0.5	64	0.5	0.3	0.7	74	-0.3	-0.5	0	138	0.01812	1
Q5PPQ7_MOUSE,COR1C_MOUSE,Q499X7_MOUSE,	2.7	2.1	3.3	13	4	3	5.2	9	-1.4	-2.6	-0.2	22	0.023429	1
GPDA_MOUSE,	2.9	1.8	4	5	1.4	0.5	2.2	9	1.5	0.1	2.9	14	0.032186	1
A1BN54_MOUSE,	0.3	0.1	0.5	65	0.6	0.4	0.8	61	-0.3	-0.5	0	126	0.035283	1
Q5SW83_MOUSE,ARP2_MOUSE,	3.4	3	3.7	21	2.9	2.5	3.3	19	0.5	0	1	40	0.039204	1
ACTN1_MOUSE,	0.3	0.1	0.5	63	0.6	0.3	0.8	59	-0.2	-0.5	0	122	0.041036	1
Q3UY71_MOUSE,LKHA4_MOUSE,	3.8	3.2	4.4	7	3	2.3	3.6	6	0.8	0	1.7	13	0.041421	1
DYHC1_MOUSE,	-0.1	-0.2	0	245	-0.2	-0.3	-0.1	304	0.1	0	0.2	549	0.042204	1
Q8CC13_MOUSE,	0.3	0.1	0.5	86	0.5	0.3	0.7	88	-0.2	-0.4	0	174	0.046061	1
NARG1_MOUSE,	-0.5	-1.2	0.2	8	0.4	-0.2	0.9	10	-0.9	-1.7	0	18	0.047116	1
Q8BUN9_MOUSE,	-1.7	-2.5	-0.9	5	-0.3	-1.4	0.8	2	-1.4	-2.8	0	7	0.048168	1
LYPD5_MOUSE,	4.7	3.9	5.5	2	3.7	3.2	4.3	5	0.9	-0.1	1.9	7	0.054108	1
EF1A2_MOUSE,	1.6	1.3	1.8	40	1.8	1.6	2.1	41	-0.3	-0.6	0.1	81	0.05545	1
CPNE2_MOUSE,	3.7	3.1	4.2	4	4.6	3.7	5.4	5	-0.9	-1.9	0.1	9	0.063254	1
Q8C5R8_MOUSE,	2.6	1.8	3.4	2	1.5	0.3	2.4	3	1.1	-0.2	2.5	5	0.070222	1
Q8C9V6_MOUSE,Q8R0J2_MOUSE,Q5F2B1_MOUSE,Q5F2A9_MOUSE,MPU1_MOUSE,	1.1	0.3	1.9	4	-0.1	-1.3	1	2	1.2	-0.2	2.7	6	0.074224	1
Q3UFJ3_MOUSE,ODPA_MOUSE,	-2.8	-3.3	-2.4	10	-2.3	-2.8	-1.7	9	-0.6	-1.3	0.1	19	0.077457	1
SEPT2_MOUSE,	1.1	0.7	1.6	8	1.7	1.1	2.3	9	-0.6	-1.3	0.1	17	0.079016	1
CB39L_MOUSE,	0.4	-0.2	1.2	4	1.3	0.6	2.2	5	-0.9	-2	0.2	9	0.080888	1
ARF5_MOUSE,	-0.4	-0.8	0	12	0	-0.3	0.4	14	-0.4	-0.9	0.1	26	0.084212	1
TBA1C_MOUSE,Q52L87_MOUSE,	0.8	0.7	1	297	0.9	0.8	1	289	-0.1	-0.2	0.1	586	0.085874	1
DPYL5_MOUSE,	6.3	5.4	7	7	5.3	4.5	6.1	3	0.9	-0.2	2	10	0.097355	1
ST32C_MOUSE,	0.3	-0.1	0.8	10	0.8	0.4	1.3	11	-0.5	-1.2	0.1	21	0.098565	1
K2C1_MOUSE,	5.8	5.5	6.2	32	6.1	5.8	6.5	28	-0.3	-0.7	0.1	60	0.10164	1
Q3UBU0_MOUSE,	0.9	0.5	1.3	15	1.3	0.9	1.7	15	-0.4	-0.9	0.1	30	0.10325	1
Q3UCH0_MOUSE,RL6_MOUSE,	0.5	0.2	0.8	24	0.8	0.5	1.1	21	-0.3	-0.7	0.1	45	0.10389	1
CHID1_MOUSE,	3.2	2.3	4.1	4	4.1	3.4	5.1	5	-0.9	-2.5	0.3	9	0.10814	1
Q4FJX9_MOUSE,SODM_MOUSE,	-3.6	-4.2	-3	4	-2.8	-3.6	-1.9	2	-0.8	-1.8	0.2	6	0.10983	1
DHX9_MOUSE,	0.2	-0.1	0.5	28	0.5	0.2	0.8	32	-0.3	-0.7	0.1	60	0.11584	1
SERA_MOUSE,	1	0.5	1.6	10	1.6	1	2	12	-0.5	-1.2	0.2	22	0.11654	1
PACS2_MOUSE,	1.5	1	2	7	0.8	0	1.7	2	0.7	-0.2	1.7	9	0.11881	1
HS74L_MOUSE,	2.2	1.9	2.5	28	2.5	2.1	3	22	-0.4	-0.9	0.1	50	0.11938	1
ROA2_MOUSE,	2.8	2.3	3.4	9	3.6	2.8	4.3	6	-0.7	-1.6	0.2	15	0.12048	1
CC50A_MOUSE,	0.9	0.5	1.4	11	1.4	1	1.7	15	-0.4	-1	0.2	26	0.12267	1
NEUM_MOUSE,	0.9	0.7	1.2	38	1.2	0.9	1.5	26	-0.2	-0.6	0.1	64	0.12538	1
A4FUW1_MOUSE,RPTOR_MOUSE,A2ACM0_MOUSE,	0.3	-0.3	0.9	9	-0.4	-1.2	0.4	7	0.7	-0.3	1.7	16	0.12693	1
Q544R5_MOUSE,Q8BUM1_MOUSE,Q3V0E7_MOUSE,TADBP_MOUSE,	-0.5	-1.2	0.2	5	0.2	-0.5	1	6	-0.7	-1.7	0.3	11	0.13555	1
PYGB_MOUSE,A2AWQ5_MOUSE,Q3UGT5_MOUSE,Q3V3U0_MOUSE,	3.8	3.5	4.1	34	3.5	3.1	3.9	31	0.3	-0.2	0.8	65	0.13571	1
Q8BM48_MOUSE,SC11C_MOUSE,	-0.9	-1.8	0.1	3	0.1	-0.9	1.2	2	-1.1	-2.5	0.4	5	0.13587	1
MK01_MOUSE,	2.7	2.4	3	33	2.9	2.7	3.2	30	-0.2	-0.6	0.1	63	0.13668	1
Q4FJK0_MOUSE,DECR_MOUSE,	2.9	1.8	4	2	3.8	3.2	4.3	5	-0.9	-2.1	0.3	7	0.13781	1
HIP1_MOUSE,	-1.2	-2.2	-0.3	3	-0.4	-1.1	0.3	7	-0.8	-2	0.3	10	0.14091	1
VP26B_MOUSE,	3.9	3.1	4.5	10	4.4	3.9	5	11	-0.6	-1.5	0.2	21	0.14177	1
Q549X4_MOUSE,RB27B_MOUSE,	0.8	0.3	1.3	9	1.3	0.8	1.8	7	-0.5	-1.2	0.2	16	0.14209	1
CP51A_MOUSE,	-1.6	-2.8	-0.5	2	-0.6	-1.5	0.2	4	-1	-2.5	0.4	6	0.14255	1
CC132_MOUSE,	-0.5	-1	0	16	-0.1	-0.5	0.4	16	-0.4	-1	0.2	32	0.14586	1
GLOD4_MOUSE,	3	1.9	4.1	4	2.1	1.5	2.7	5	0.9	-0.4	2.1	9	0.14977	1
RBGP1_MOUSE,B2RRC5_MOUSE,	0.3	-0.2	0.7	13	-0.2	-0.8	0.4	9	0.5	-0.2	1.2	22	0.15178	1
Q0PD63_MOUSE,RAB3A_MOUSE,	-0.3	-0.5	-0.1	81	-0.1	-0.3	0.1	76	-0.2	-0.4	0.1	157	0.15184	1
Q570Z8_MOUSE,	0	-0.3	0.3	36	0.3	0	0.6	30	-0.3	-0.6	0.1	66	0.15271	1
ATPB_MOUSE,	-1.6	-1.8	-1.3	49	-1.4	-1.6	-1.1	39	-0.2	-0.5	0.1	88	0.15368	1
GBB2_MOUSE,Q3U9V4_MOUSE,	-0.4	-0.7	-0.2	35	-0.6	-0.9	-0.3	24	0.2	-0.1	0.6	59	0.1563	1
SEPT5_MOUSE,	1.2	0.8	1.5	16	1.4	1.2	1.7	30	-0.3	-0.7	0.2	46	0.15901	1
B2RSH2_MOUSE,	-0.3	-0.6	-0.1	45	-0.2	-0.4	0.1	45	-0.2	-0.5	0.1	90	0.1608	1
Q9D8L3_MOUSE,SSRD_MOUSE,Q3TVJ8_MOUSE,	-1.1	-1.6	-0.5	6	-0.6	-1.1	-0.1	7	-0.5	-1.2	0.3	13	0.16112	1
FAK2_MOUSE,	0.7	0.4	1.1	21	1	0.7	1.3	23	-0.3	-0.7	0.2	44	0.16264	1
Q78NS1_MOUSE,	-0.9	-1.2	-0.6	31	-0.7	-1	-0.4	35	-0.3	-0.7	0.2	66	0.16327	1
K1967_MOUSE,	0.8	0.2	1.3	9	0.2	-0.4	0.9	5	0.6	-0.3	1.4	14	0.16381	1
B2RTP7_MOUSE,K22E_MOUSE,	6.2	5.8	6.6	17	5.7	5.3	6.3	15	0.4	-0.2	1.1	32	0.16405	1
EFHA2_MOUSE,	-1.7	-2.3	-1	5	-1.1	-1.7	-0.5	7	-0.6	-1.5	0.3	12	0.16811	1
NDUAA_MOUSE,	-1.8	-2.1	-1.6	30	-2.1	-2.4	-1.8	20	0.2	-0.1	0.6	50	0.16935	1
Q3UH69_MOUSE,Q3UH37_MOUSE,B9EIV5_MOUSE,	1.8	1.5	2.1	36	2.1	1.7	2.4	27	-0.3	-0.7	0.2	63	0.17071	1
CD166_MOUSE,Q54AJ5_MOUSE,	0.5	0.3	0.8	54	0.7	0.5	1	44	-0.2	-0.5	0.1	98	0.17124	1
SYUB_MOUSE,	0.1	-0.2	0.5	14	-0.2	-0.6	0.2	11	0.3	-0.2	0.9	25	0.17243	1
CPNE6_MOUSE,	3.9	3.4	4.4	14	4.3	3.8	5.4	9	-0.5	-1.6	0.3	23	0.17403	1
MPCP_MOUSE,Q3THU8_MOUSE,	-1.4	-1.5	-1.2	137	-1.3	-1.5	-1.1	133	-0.1	-0.3	0.1	270	0.17481	1
4F2_MOUSE,	-0.6	-0.8	-0.4	60	-0.4	-0.6	-0.2	71	-0.2	-0.4	0.1	131	0.17548	1
PTPA_MOUSE,Q543N6_MOUSE,	3.2	2.8	3.6	12	3.5	3.1	3.9	15	-0.3	-0.8	0.2	27	0.17597	1
Q58E64_MOUSE,EF1A1_MOUSE,Q3UA81_MOUSE,	1.5	1.3	1.8	39	1.7	1.5	2	42	-0.2	-0.5	0.1	81	0.17871	1
A2ARC5_MOUSE,S27A4_MOUSE,	-0.7	-1.2	-0.1	10	-0.2	-0.7	0.3	11	-0.5	-1.2	0.3	21	0.17917	1
VAT1L_MOUSE,	5.4	5	5.8	24	5.7	5.3	6.1	15	-0.4	-0.9	0.2	39	0.17958	1
GFAP_MOUSE,	0.6	0.1	1.2	19	1	0.6	1.4	25	-0.4	-1	0.2	44	0.18074	1
TWF2_MOUSE,	0.9	0.4	1.4	9	1.4	0.7	2.1	8	-0.5	-1.4	0.3	17	0.18109	1
Q7TNL5_MOUSE,Q91V89_MOUSE,Q8K5D8_MOUSE,	-0.2	-0.5	0.1	33	0.1	-0.3	0.4	25	-0.3	-0.7	0.2	58	0.18511	1
ATPO_MOUSE,	-0.5	-0.9	-0.2	17	-0.8	-1.3	-0.4	13	0.3	-0.2	0.8	30	0.18704	1
B0QZW1_MOUSE,	-1.2	-1.4	-1	54	-1	-1.3	-0.8	57	-0.2	-0.5	0.1	111	0.19039	1
GBB1_MOUSE,Q3TQ70_MOUSE,	-0.4	-0.6	-0.2	46	-0.6	-0.9	-0.3	31	0.2	-0.1	0.5	77	0.19095	1
Q3TJD0_MOUSE,S61A1_MOUSE,	-1.2	-2	-0.5	4	-0.6	-1.2	0	4	-0.6	-1.6	0.4	8	0.19169	1
LANC2_MOUSE,	3.7	3.2	4.2	21	3.2	2.7	3.8	16	0.4	-0.3	1.1	37	0.19391	1
HAX1_MOUSE,B9EJR4_MOUSE,	0.8	-0.1	1.9	6	0	-0.8	0.8	3	0.8	-0.5	2.2	9	0.19667	1
Q8K0E2_MOUSE,EXOC3_MOUSE,	0.4	-0.2	0.9	9	-0.1	-0.6	0.4	12	0.4	-0.3	1.1	21	0.19772	1
C9K0Y5_MOUSE,	-1.2	-1.5	-1	54	-1.1	-1.3	-0.8	57	-0.2	-0.5	0.1	111	0.1992	1
RRAGA_MOUSE,	0.3	-0.2	0.9	7	0.8	0.2	1.5	4	-0.5	-1.4	0.3	11	0.20198	1
ACADV_MOUSE,B1AR27_MOUSE,	0.6	0.1	1.1	13	1	0.5	1.5	8	-0.4	-1.1	0.3	21	0.20441	1
CH60_MOUSE,	-0.6	-1	-0.3	26	-0.4	-0.7	-0.1	28	-0.2	-0.7	0.2	54	0.20666	1
PGRC2_MOUSE,	0	-0.6	0.5	7	0.4	-0.1	0.9	9	-0.4	-1.1	0.3	16	0.20692	1
KAPCA_MOUSE,	0.9	0.7	1.2	23	1.2	0.9	1.4	33	-0.2	-0.6	0.2	56	0.20757	1
Q5SQ25_MOUSE,S14L2_MOUSE,	2.8	2.2	3.9	6	3.7	2.8	4.5	5	-0.8	-1.9	0.6	11	0.20786	1
PSD3_MOUSE,	1.5	1.2	1.9	18	1.2	0.7	1.7	9	0.3	-0.2	0.9	27	0.20821	1
EFR3A_MOUSE,	-0.5	-1	0	9	0	-0.6	0.7	5	-0.5	-1.3	0.3	14	0.21011	1
GSTM1_MOUSE,	3	2.1	4.2	5	3.9	3.3	4.5	5	-0.8	-1.9	0.5	10	0.2104	1
Q8BGM2_MOUSE,P5CS_MOUSE,Q3TWN8_MOUSE,	0.6	-0.1	1.2	6	1.1	0.5	1.8	6	-0.5	-1.5	0.4	12	0.2114	1
SIRT2_MOUSE,	-2	-2.3	-1.7	25	-2.2	-2.5	-1.9	18	0.2	-0.2	0.6	43	0.21306	1
ODPB_MOUSE,	-2.7	-3.2	-2.3	7	-2.3	-2.9	-1.8	6	-0.4	-1.1	0.3	13	0.21574	1
ENOG_MOUSE,Q545V3_MOUSE,Q3UJ20_MOUSE,	3.2	2.9	3.5	30	3.5	3.1	3.8	30	-0.2	-0.7	0.2	60	0.21603	1
Q3V2Z8_MOUSE,	-0.3	-1.6	0.9	4	-1.2	-2	-0.4	3	0.9	-0.6	2.4	7	0.2167	1
VINC_MOUSE,	0.8	0.2	1.4	6	1.2	0.8	1.8	10	-0.5	-1.2	0.3	16	0.21742	1
KCC2G_MOUSE,Q6ZWS7_MOUSE,	-1.6	-1.8	-1.4	77	-1.5	-1.7	-1.3	75	-0.1	-0.4	0.1	152	0.21744	1
B9EIC7_MOUSE,PHYIP_MOUSE,	3	2.4	3.7	8	3.5	3	4	17	-0.5	-1.2	0.3	25	0.22019	1
SNG3_MOUSE,	0.7	0.3	1.1	14	1	0.6	1.4	12	-0.3	-0.8	0.2	26	0.2226	1
A2AGS6_MOUSE,Q3UQL4_MOUSE,Q4QQM4_MOUSE,	1.6	0.7	2.5	3	0.9	0	1.7	5	0.7	-0.5	2	8	0.22395	1
SCAM1_MOUSE,Q3TD71_MOUSE,	0.5	0.3	0.8	34	0.3	0.1	0.6	32	0.2	-0.2	0.5	66	0.22686	1
FAS_MOUSE,	0.9	0.7	1.1	87	0.8	0.6	1	66	0.1	-0.1	0.4	153	0.22857	1
THOP1_MOUSE,	1	0.2	1.8	6	1.5	1	2.1	8	-0.5	-1.5	0.4	14	0.2324	1
VATB2_MOUSE,	2.2	1.9	2.5	25	2	1.7	2.3	26	0.2	-0.2	0.6	51	0.23272	1
CUL3_MOUSE,Q6ZQ84_MOUSE,	0.8	0.5	1.1	28	1	0.7	1.3	26	-0.2	-0.7	0.2	54	0.23534	1
A3KML3_MOUSE,1433T_MOUSE,	2	1.8	2.3	29	2.2	1.9	2.5	28	-0.2	-0.6	0.2	57	0.2363	1
AUXI_MOUSE,B1AYC5_MOUSE,	0.6	0.3	0.9	32	0.8	0.5	1.1	29	-0.2	-0.6	0.2	61	0.23843	1
Q3UJS0_MOUSE,RL8_MOUSE,	1.2	0.8	1.5	12	0.9	0.5	1.3	11	0.3	-0.2	0.8	23	0.24047	1
Q7TSZ0_MOUSE,Q3TW93_MOUSE,GRP75_MOUSE,	-1.7	-2.2	-1.2	7	-1.3	-1.8	-0.8	9	-0.4	-1.1	0.3	16	0.24313	1
DHB12_MOUSE,Q0VGQ1_MOUSE,	-0.7	-1	-0.4	26	-0.5	-0.8	-0.1	25	-0.2	-0.7	0.2	51	0.24505	1
PK3C3_MOUSE,	0.1	-0.6	0.8	6	-0.6	-1.6	0.4	3	0.7	-0.5	1.9	9	0.24611	1
SCMC3_MOUSE,	-1	-1.4	-0.6	17	-1.3	-1.7	-0.9	16	0.3	-0.3	0.9	33	0.24683	1
ODO1_MOUSE,	-0.3	-0.8	0.2	16	0	-0.4	0.5	13	-0.3	-0.9	0.3	29	0.24713	1
GNL1_MOUSE,	0.2	-0.3	0.6	13	0.5	0	1	10	-0.3	-1	0.3	23	0.24794	1
VDAC2_MOUSE,	-1.3	-1.5	-1.1	68	-1.2	-1.4	-1	72	-0.1	-0.4	0.1	140	0.25023	1
UBA1_MOUSE,B9EHN0_MOUSE,	1.8	1.5	2	49	1.9	1.7	2.1	55	-0.1	-0.4	0.1	104	0.25204	1
Q80U36_MOUSE,	-0.1	-0.3	0.1	95	-0.2	-0.4	0	117	0.1	-0.1	0.3	212	0.25263	1
A2A4K6_MOUSE,	-0.5	-0.8	-0.2	29	-0.3	-0.6	0	31	-0.2	-0.6	0.2	60	0.2535	1
PTPRN_MOUSE,Q925J7_MOUSE,Q6NVE2_MOUSE,A6MDD2_MOUSE,Q3UTI6_MOUSE,Q5DTQ3_MOUSE,	2.1	1.2	3	3	2.7	2	3.3	3	-0.6	-1.7	0.5	6	0.25565	1
2AAA_MOUSE,	0.5	0.3	0.7	70	0.6	0.4	0.8	74	-0.1	-0.4	0.1	144	0.25679	1
Q6NVF0_MOUSE,	0.8	0.1	1.6	5	1.3	0.8	1.8	8	-0.5	-1.4	0.4	13	0.258	1
Q5SX58_MOUSE,Q4FK59_MOUSE,ENOB_MOUSE,	3.5	3.1	3.9	11	3.8	3.4	4.3	11	-0.3	-0.9	0.3	22	0.26013	1
SYNPR_MOUSE,	-0.9	-1.7	-0.2	6	-0.4	-1	0.2	9	-0.5	-1.4	0.4	15	0.26275	1
ARF3_MOUSE,ARF1_MOUSE,Q3U344_MOUSE,	0.1	-0.4	0.6	8	0.4	0.1	0.7	21	-0.3	-0.9	0.3	29	0.2651	1
ETFA_MOUSE,B1B1B4_MOUSE,	0.4	-0.4	1.2	4	0.9	0.3	1.5	6	-0.5	-1.5	0.5	10	0.26801	1
DLDH_MOUSE,	-2.4	-3	-1.8	6	-1.8	-2.7	-1	3	-0.5	-1.5	0.5	9	0.2691	1
CSN6_MOUSE,Q3UIT2_MOUSE,	1.6	0.9	2.5	4	2.2	1.5	3	6	-0.6	-1.7	0.6	10	0.27065	1
A2VDF7_MOUSE,S4A4_MOUSE,A7E1Z5_MOUSE,	-0.6	-1	-0.3	33	-0.8	-1.1	-0.5	33	0.2	-0.2	0.6	66	0.27142	1
GRIA3_MOUSE,A2VDF5_MOUSE,	-1.1	-1.4	-0.9	57	-1	-1.2	-0.8	62	-0.1	-0.4	0.2	119	0.27173	1
DOCK3_MOUSE,	-0.4	-1	0.3	9	0.1	-0.6	0.9	7	-0.5	-1.5	0.5	16	0.27209	1
Q3TXK7_MOUSE,	-0.2	-0.4	0	49	-0.1	-0.3	0.2	56	-0.1	-0.4	0.2	105	0.27386	1
CISY_MOUSE,	-2.4	-3.1	-1.8	5	-2	-2.5	-1.5	6	-0.4	-1.3	0.4	11	0.27596	1
LETM1_MOUSE,	-1.4	-1.6	-1.1	49	-1.2	-1.4	-1	51	-0.1	-0.4	0.2	100	0.27599	1
IPO7_MOUSE,	0.3	0	0.6	36	0.1	-0.2	0.4	33	0.2	-0.2	0.6	69	0.27626	1
Q3UMG4_MOUSE,	0.4	-0.3	1.1	6	0.9	0.2	1.8	5	-0.5	-1.6	0.5	11	0.27635	1
AOFB_MOUSE,Q14CG9_MOUSE,	-0.3	-0.5	0	28	-0.1	-0.3	0.2	39	-0.2	-0.5	0.2	67	0.28197	1
Q542X7_MOUSE,TCPB_MOUSE,	2.7	2	3.3	11	2.2	1.7	2.8	12	0.4	-0.4	1.2	23	0.28381	1
Q9CXX7_MOUSE,SNRPA_MOUSE,	0.5	-0.2	1.3	5	1	0.4	1.6	4	-0.5	-1.4	0.5	9	0.28416	1
K2C79_MOUSE,	5.7	5.3	6	26	5.9	5.6	6.2	29	-0.2	-0.7	0.2	55	0.28459	1
Q3TI62_MOUSE,TCPZ_MOUSE,Q3TI05_MOUSE,Q52KG9_MOUSE,Q3TIX8_MOUSE,	1.9	1.6	2.3	20	1.7	1.2	2.1	11	0.3	-0.3	0.8	31	0.28734	1
RAB9B_MOUSE,Q3KNA5_MOUSE,	0.1	-1	1.3	2	0.8	0.2	1.5	4	-0.7	-2	0.7	6	0.28764	1
RUFY3_MOUSE,	0.5	0.2	0.9	21	0.3	0	0.7	18	0.2	-0.2	0.7	39	0.28847	1
AMPH_MOUSE,	0.8	0.4	1.2	14	0.4	-0.3	1.1	5	0.4	-0.4	1.2	19	0.2905	1
Q3UHH0_MOUSE,AT2B2_MOUSE,Q3UHJ3_MOUSE,	-1.8	-2	-1.7	156	-1.7	-1.9	-1.6	149	-0.1	-0.3	0.1	305	0.29106	1
MYH9_MOUSE,	0.2	-0.1	0.4	57	0.3	0.1	0.6	46	-0.1	-0.5	0.2	103	0.29129	1
FA73B_MOUSE,	-1.2	-2	-0.5	6	-0.6	-1.6	0.2	6	-0.6	-1.7	0.6	12	0.29156	1
Q91YH6_MOUSE,Q8C3L6_MOUSE,Q6P6I3_MOUSE,	2.3	1.8	2.7	10	2	1.5	2.5	7	0.3	-0.3	1	17	0.29245	1
DRS7B_MOUSE,	-1.1	-1.8	-0.5	7	-0.7	-1.3	-0.1	9	-0.4	-1.3	0.4	16	0.29438	1
TIPRL_MOUSE,	0.7	0.2	1.3	10	1.1	0.6	1.7	8	-0.4	-1.1	0.4	18	0.29504	1
B5TVM2_MOUSE,	-0.4	-1	0.1	9	0	-0.7	0.6	8	-0.4	-1.2	0.4	17	0.29508	1
Q8CE19_MOUSE,	3.1	2.9	3.3	65	3.2	3	3.5	63	-0.1	-0.4	0.2	128	0.29525	1
Q7TT13_MOUSE,MINK1_MOUSE,Q5SXG3_MOUSE,Q5SXG1_MOUSE,Q5SXG0_MOUSE,Q5SXG2_MOUSE,	1.1	0.5	1.8	6	1.5	1	2	12	-0.4	-1.2	0.4	18	0.29548	1
Q544L9_MOUSE,EFNB1_MOUSE,	0.4	-0.5	1.3	2	1	0.1	2	2	-0.7	-2.1	0.7	4	0.29823	1
ACACA_MOUSE,	0.2	-0.5	0.9	7	0.8	-0.1	1.8	5	-0.6	-1.8	0.6	12	0.30013	1
A2AAV4_MOUSE,TBCD_MOUSE,	0.1	-0.4	0.6	13	0.4	-0.1	0.9	10	-0.3	-1	0.4	23	0.30061	1
K2C73_MOUSE,	5.8	5.5	6.2	25	6.1	5.7	6.4	28	-0.2	-0.7	0.2	53	0.30197	1
GSK3A_MOUSE,	-0.1	-0.7	0.5	5	0.3	-0.2	0.8	8	-0.4	-1.2	0.4	13	0.30319	1
NBEA_MOUSE,	0.3	-0.2	0.7	15	0	-0.4	0.4	26	0.3	-0.3	0.8	41	0.3033	1
BASP1_MOUSE,	-2.4	-2.6	-2.1	24	-2.5	-2.8	-2.3	22	0.2	-0.2	0.5	46	0.30431	1
ABCB7_MOUSE,A2AC46_MOUSE,	-1	-1.4	-0.5	14	-1.4	-2	-0.6	7	0.4	-0.4	1.1	21	0.30493	1
CG020_MOUSE,	0.4	-0.4	1.3	6	-0.2	-1.1	0.7	2	0.6	-0.6	1.9	8	0.30528	1
MON2_MOUSE,	-0.5	-1.6	0.6	3	0.1	-0.5	0.7	10	-0.6	-1.8	0.6	13	0.3055	1
NMDZ1_MOUSE,A2AI21_MOUSE,	-1	-1.3	-0.7	34	-0.8	-1.1	-0.5	35	-0.2	-0.6	0.2	69	0.30564	1
DPYL2_MOUSE,	1.1	0.9	1.4	32	1	0.7	1.3	32	0.2	-0.2	0.5	64	0.30798	1
UIF_MOUSE,	-0.2	-0.9	0.6	4	0.5	-0.5	1.3	3	-0.6	-1.7	0.6	7	0.30829	1
1433Z_MOUSE,	2	1.8	2.2	56	2.1	1.9	2.3	49	-0.1	-0.4	0.2	105	0.30975	1
NCAM2_MOUSE,	0	-0.2	0.3	42	0.2	-0.1	0.4	46	-0.1	-0.4	0.2	88	0.31011	1
A2AD89_MOUSE,ATAD3_MOUSE,Q3TA78_MOUSE,	-1.2	-1.5	-0.9	28	-1.4	-1.7	-1	20	0.2	-0.2	0.6	48	0.31079	1
ARP3B_MOUSE,	3.5	2.8	4.2	8	2.9	2	4	2	0.6	-0.7	1.7	10	0.31134	1
TBAL3_MOUSE,B9EJS3_MOUSE,	0.9	0.6	1.2	35	1.1	0.8	1.4	32	-0.2	-0.6	0.2	67	0.31199	1
Q3U7K1_MOUSE,Q6ZWM8_MOUSE,PP1G_MOUSE,	2.6	2.1	2.9	17	2.8	2.4	3.2	26	-0.3	-0.8	0.3	43	0.31445	1
Q4FZK2_MOUSE,EF1G_MOUSE,	0.9	0.5	1.2	16	1.1	0.8	1.4	20	-0.2	-0.7	0.2	36	0.31452	1
IDH3A_MOUSE,	-1.5	-1.9	-1.2	17	-1.3	-1.6	-1	22	-0.2	-0.7	0.2	39	0.31534	1
TBA4A_MOUSE,	0.7	0.6	0.9	237	0.8	0.7	0.9	224	-0.1	-0.2	0.1	461	0.31651	1
A5D6Q8_MOUSE,	-0.5	-0.9	-0.1	20	-0.2	-0.6	0.1	20	-0.2	-0.8	0.3	40	0.31671	1
Q8K1J7_MOUSE,ACSL3_MOUSE,	-0.8	-1.3	-0.2	13	-0.5	-0.9	0	14	-0.3	-1	0.4	27	0.31819	1
B7ZN22_MOUSE,B7ZN20_MOUSE,ELMD1_MOUSE,Q0P556_MOUSE,	-1.5	-2.3	-0.6	4	-1	-1.6	-0.3	6	-0.5	-1.5	0.5	10	0.31915	1
Q80UN0_MOUSE,UBP14_MOUSE,	1.5	0.9	2.3	5	2.1	1.2	3.2	4	-0.5	-1.8	0.6	9	0.31919	1
Q3TKM5_MOUSE,IDH3G_MOUSE,Q3TGZ3_MOUSE,	-1	-1.4	-0.7	15	-0.8	-1.2	-0.4	14	-0.2	-0.7	0.3	29	0.32483	1
AP3D1_MOUSE,	0	-0.3	0.2	44	0.1	-0.1	0.4	43	-0.1	-0.5	0.2	87	0.32551	1
UCHL1_MOUSE,Q3TCH2_MOUSE,	2.6	2.1	3.2	5	2.3	1.6	2.9	7	0.4	-0.4	1.2	12	0.32561	1
SEPT7_MOUSE,	1.1	0.9	1.3	35	1.2	1	1.5	39	-0.1	-0.5	0.2	74	0.32834	1
PLXA2_MOUSE,	0.1	-0.3	0.5	17	-0.3	-0.8	0.4	15	0.3	-0.4	1	32	0.33082	1
Q921Z9_MOUSE,	4.2	3.4	5	3	3.7	2.9	4.5	5	0.5	-0.6	1.7	8	0.33113	1
VGLU2_MOUSE,	-0.1	-0.5	0.4	15	0.2	-0.2	0.6	18	-0.3	-0.8	0.3	33	0.33215	1
Q8C4I3_MOUSE,	-1.1	-1.4	-0.9	55	-1	-1.2	-0.8	49	-0.1	-0.4	0.2	104	0.33399	1
Q3UQL2_MOUSE,CSN3_MOUSE,	0.7	0.2	1.1	12	0.9	0.5	1.3	16	-0.2	-0.8	0.3	28	0.33563	1
Q8CHR8_MOUSE,Q8BNS0_MOUSE,DRG1_MOUSE,Q5NBZ3_MOUSE,	0.5	-0.5	1.3	4	-0.1	-0.7	0.5	7	0.5	-0.6	1.5	11	0.33603	1
SYAC_MOUSE,Q3UD67_MOUSE,	2.1	1.7	2.5	27	1.8	1.5	2.3	19	0.2	-0.3	0.8	46	0.33711	1
CCG8_MOUSE,	0.4	0	0.8	18	0.1	-0.3	0.5	17	0.2	-0.3	0.8	35	0.33779	1
Q6GTI3_MOUSE,Q3TD17_MOUSE,GTR1_MOUSE,Q3U2J2_MOUSE,	-1.8	-2.3	-1.3	5	-2.1	-2.6	-1.6	6	0.3	-0.4	1.1	11	0.3407	1
TM163_MOUSE,	0.2	-0.3	0.7	9	0.5	0	1	10	-0.3	-1	0.4	19	0.34338	1
ADT2_MOUSE,Q545A2_MOUSE,	-1.5	-1.7	-1.4	197	-1.4	-1.6	-1.3	162	-0.1	-0.3	0.1	359	0.34353	1
Q3U2F9_MOUSE,Q3THF3_MOUSE,GBB4_MOUSE,	-0.5	-0.9	-0.2	18	-0.8	-1.2	-0.3	11	0.2	-0.3	0.7	29	0.344	1
Q3TI61_MOUSE,Q3TW71_MOUSE,PSMD2_MOUSE,Q3TIP0_MOUSE,Q3TKV1_MOUSE,Q3TXV1_MOUSE,	3	2	3.8	5	2.4	1.7	3.1	6	0.6	-0.6	1.7	11	0.34418	1
Q80YU5_MOUSE,MOG_MOUSE,Q3UY21_MOUSE,	-1.1	-1.3	-0.8	44	-0.9	-1.2	-0.7	39	-0.1	-0.4	0.2	83	0.34507	1
PLCX3_MOUSE,	1.7	1.2	2.2	8	2	1.6	2.5	11	-0.3	-1	0.4	19	0.34653	1
CN37_MOUSE,Q3TYV5_MOUSE,	-1.5	-1.7	-1.3	83	-1.6	-1.8	-1.4	56	0.1	-0.2	0.3	139	0.34683	1
Q8C0E9_MOUSE,	1.4	1.1	1.7	19	1.2	0.8	1.6	8	0.2	-0.3	0.8	27	0.34937	1
Q3UJH5_MOUSE,Q3U861_MOUSE,VATD_MOUSE,	1.7	1.4	2	19	1.5	1.2	1.8	19	0.2	-0.2	0.6	38	0.34998	1
SYEP_MOUSE,	1.7	1.3	2.1	22	1.5	1.1	1.8	18	0.2	-0.3	0.7	40	0.35002	1
OPA1_MOUSE,	-0.5	-0.7	-0.3	68	-0.4	-0.6	-0.2	57	-0.1	-0.4	0.2	125	0.35104	1
B2RXT3_MOUSE,	-0.8	-1.4	-0.2	8	-0.5	-1	0.1	8	-0.4	-1.1	0.4	16	0.35162	1
STXB5_MOUSE,	0.2	-0.2	0.6	14	0	-0.4	0.4	18	0.2	-0.3	0.8	32	0.3518	1
RGRF2_MOUSE,	-0.1	-0.4	0.3	18	-0.3	-0.6	0.1	19	0.2	-0.3	0.7	37	0.35188	1
CKAP4_MOUSE,	-0.6	-0.9	-0.2	24	-0.8	-1.1	-0.4	27	0.2	-0.3	0.6	51	0.35194	1
B1AU25_MOUSE,B1AU24_MOUSE,AIFM1_MOUSE,	-1.8	-2.1	-1.5	21	-1.6	-2	-1.3	20	-0.2	-0.6	0.2	41	0.35316	1
DNJC5_MOUSE,A2AUE2_MOUSE,	-0.1	-0.4	0.1	51	0	-0.2	0.2	50	-0.1	-0.4	0.2	101	0.35382	1
ASPH2_MOUSE,	-0.1	-0.5	0.4	10	-0.4	-0.9	0.2	7	0.3	-0.4	1	17	0.3545	1
Q543Y7_MOUSE,PACN1_MOUSE,	2	1.5	2.5	13	1.7	1.2	2.2	10	0.3	-0.4	1	23	0.35632	1
Q5M9K0_MOUSE,	1.1	0.4	1.7	3	1.5	0.8	2.3	4	-0.4	-1.4	0.5	7	0.35655	1
PPM1F_MOUSE,	0.7	-0.1	2.1	4	1.5	0.9	2	5	-0.6	-1.7	0.7	9	0.35898	1
Q3U125_MOUSE,CJ058_MOUSE,	-0.5	-0.8	-0.1	17	-0.3	-0.6	0.1	20	-0.2	-0.7	0.3	37	0.35996	1
KAPCB_MOUSE,	0.9	0.6	1.1	34	1	0.8	1.2	45	-0.1	-0.5	0.2	79	0.36135	1
SYPH_MOUSE,B1AVA7_MOUSE,	0.2	0	0.5	45	0.4	0.1	0.6	41	-0.1	-0.4	0.2	86	0.36183	1
A2AKI6_MOUSE,	-1	-1.7	-0.2	7	-0.5	-1.2	0.1	7	-0.4	-1.4	0.6	14	0.36275	1
SV2B_MOUSE,	0.1	-0.1	0.3	93	0.2	0	0.4	80	-0.1	-0.3	0.2	173	0.36298	1
Q3US15_MOUSE,NSDHL_MOUSE,	-0.3	-0.7	0.2	12	0.1	-0.6	0.8	5	-0.4	-1.2	0.5	17	0.3639	1
SFXN3_MOUSE,	-1.6	-1.8	-1.4	54	-1.5	-1.7	-1.2	39	-0.1	-0.4	0.2	93	0.36413	1
RS6_MOUSE,Q5BLK1_MOUSE,	-0.6	-1	-0.2	16	-0.4	-0.7	0	21	-0.2	-0.7	0.3	37	0.36419	1
PRDX3_MOUSE,	-1	-1.9	0	3	-0.3	-1.5	0.9	2	-0.7	-2.2	0.8	5	0.36444	1
NDRG2_MOUSE,	2.2	1.9	2.6	23	2.4	2.1	2.7	22	-0.2	-0.6	0.3	45	0.36545	1
B2RQR5_MOUSE,Q3TDT4_MOUSE,	1.1	0.6	1.6	10	1.4	0.8	2	7	-0.3	-1	0.4	17	0.36679	1
SRPRB_MOUSE,	-0.2	-0.7	0.3	10	0.1	-0.5	0.8	6	-0.4	-1.2	0.5	16	0.36719	1
TECR_MOUSE,	-0.7	-1.3	-0.1	6	-0.3	-0.9	0.2	10	-0.3	-1.1	0.5	16	0.36776	1
Q545F8_MOUSE,Q545X8_MOUSE,Q3UXQ6_MOUSE,RS4X_MOUSE,	0	-0.3	0.3	24	0.2	-0.1	0.5	28	-0.2	-0.6	0.2	52	0.36933	1
A2AI77_MOUSE,CNKR2_MOUSE,	-0.2	-1	0.5	5	-0.8	-2	0.3	2	0.6	-0.8	2	7	0.36971	1
Q80VM5_MOUSE,	0.2	0	0.5	47	0.4	0.1	0.6	50	-0.1	-0.4	0.2	97	0.3703	1
H4_MOUSE,B2RTM0_MOUSE,	0.6	0.1	1.1	12	0.9	0.5	1.2	12	-0.3	-0.8	0.3	24	0.37046	1
Q3TNN9_MOUSE,Q8BN81_MOUSE,Q6ZQ37_MOUSE,Q3V319_MOUSE,Q6NVF8_MOUSE,CDK14_MOUSE,Q8C411_MOUSE,	0.3	-0.3	1	5	0.8	-0.1	1.7	3	-0.5	-1.6	0.6	8	0.37503	1
VPS53_MOUSE,Q3TLZ3_MOUSE,Q3UDN2_MOUSE,Q3TX19_MOUSE,	-0.3	-0.7	0.2	14	0	-0.5	0.6	9	-0.3	-0.9	0.4	23	0.37555	1
DHSA_MOUSE,	-3	-3.7	-2.4	3	-2.6	-3.4	-1.8	2	-0.4	-1.4	0.6	5	0.3759	1
B1AV87_MOUSE,TMM35_MOUSE,	1.6	1	2.3	4	1.1	0.4	2.1	4	0.5	-0.6	1.4	8	0.37614	1
Q3TQ33_MOUSE,Q3UPG0_MOUSE,	0.1	-0.4	0.7	8	0.5	-0.2	1.3	5	-0.4	-1.3	0.5	13	0.37642	1
Q80VZ2_MOUSE,	-1.5	-1.8	-1.2	23	-1.3	-1.7	-0.9	17	-0.2	-0.7	0.3	40	0.37659	1
NF1_MOUSE,B1AQE8_MOUSE,B1AQE7_MOUSE,	0.2	-0.2	0.5	26	0	-0.4	0.3	29	0.2	-0.3	0.7	55	0.37668	1
A2AHI4_MOUSE,PRPS2_MOUSE,	3.1	2.5	3.6	4	3.4	2.8	4	6	-0.3	-1.2	0.5	10	0.37737	1
Q69ZX9_MOUSE,	0.2	-0.1	0.6	18	0.4	0.1	0.7	23	-0.2	-0.6	0.3	41	0.37893	1
RL15_MOUSE,Q3U7D2_MOUSE,Q5M8Q0_MOUSE,	1.8	1.4	2.3	8	2.1	1.6	2.5	9	-0.2	-0.8	0.4	17	0.38164	1
KAD4_MOUSE,Q3U489_MOUSE,	1.4	0.9	1.9	12	1.1	0.5	1.6	8	0.3	-0.4	1	20	0.38387	1
EIF3H_MOUSE,Q3TII2_MOUSE,Q3THW7_MOUSE,Q5M9L0_MOUSE,Q8BTX5_MOUSE,	1	0.3	1.7	3	1.6	0.4	2.3	3	-0.5	-1.6	0.8	6	0.38442	1
PTN23_MOUSE,	-0.3	-1.2	0.6	6	0.2	-0.5	1	4	-0.5	-1.7	0.7	10	0.38673	1
TRIM3_MOUSE,Q3TDT0_MOUSE,	0.7	0.2	1.2	12	0.9	0.5	1.4	13	-0.3	-0.9	0.4	25	0.38769	1
Q3TQP7_MOUSE,THIL_MOUSE,	-2.4	-3	-1.8	5	-2	-2.6	-1.4	4	-0.3	-1.2	0.5	9	0.38812	1
AGAP3_MOUSE,	0.8	0.1	1.5	9	0.4	-0.2	1	8	0.4	-0.6	1.3	17	0.38983	1
RL17_MOUSE,Q6ZWZ7_MOUSE,Q80V08_MOUSE,Q505B1_MOUSE,	0.6	-0.2	1.5	5	1.1	0.5	1.6	7	-0.4	-1.4	0.6	12	0.38997	1
CPNS1_MOUSE,	0	-0.7	0.6	4	0.3	-0.3	1	4	-0.4	-1.3	0.5	8	0.39018	1
Q8BJL4_MOUSE,LMAN2_MOUSE,	-0.4	-0.8	0	15	-0.1	-0.6	0.3	9	-0.2	-0.9	0.4	24	0.39073	1
Q8JZU2_MOUSE,	-1	-1.3	-0.7	19	-0.8	-1.2	-0.5	18	-0.2	-0.6	0.3	37	0.39283	1
Q564E8_MOUSE,RL4_MOUSE,	-0.1	-0.4	0.2	22	0.1	-0.2	0.4	30	-0.2	-0.6	0.3	52	0.39504	1
Q8K314_MOUSE,	-1.2	-1.3	-1	112	-1.1	-1.2	-0.9	113	-0.1	-0.3	0.1	225	0.39584	1
LRC4B_MOUSE,	-0.3	-1	0.5	5	0.1	-0.6	0.9	3	-0.4	-1.5	0.6	8	0.39957	1
A3KFW2_MOUSE,TINAL_MOUSE,Q4FJX7_MOUSE,	-1.9	-2.7	-1.1	3	-1.4	-2.4	-0.4	2	-0.5	-1.7	0.7	5	0.39972	1
HS12A_MOUSE,	0.5	0.3	0.7	51	0.6	0.4	0.8	67	-0.1	-0.4	0.2	118	0.40047	1
DMXL2_MOUSE,	1.1	0.9	1.4	54	1.2	1	1.4	67	-0.1	-0.4	0.2	121	0.4009	1
Q542T4_MOUSE,Q09J72_MOUSE,	-0.4	-0.7	-0.1	33	-0.3	-0.6	0.1	37	-0.2	-0.6	0.2	70	0.40107	1
1433G_MOUSE,A8IP69_MOUSE,	1.7	1.4	1.9	27	1.8	1.5	2.1	28	-0.1	-0.5	0.2	55	0.40413	1
DP13A_MOUSE,	-0.2	-0.7	0.4	8	0.1	-0.5	0.7	6	-0.3	-1.1	0.5	14	0.40423	1
SYMC_MOUSE,	0.3	-0.4	1	11	0.6	0.1	1.1	13	-0.3	-1.1	0.5	24	0.40441	1
ITB1_MOUSE,	-1.5	-2.2	-0.7	4	-1	-2	0.1	4	-0.5	-1.7	0.7	8	0.40757	1
GNAQ_MOUSE,Q3UHH5_MOUSE,	-0.1	-0.3	0.2	38	0	-0.2	0.3	40	-0.1	-0.4	0.2	78	0.4076	1
EXOC2_MOUSE,Q5SUZ6_MOUSE,	0.3	-0.2	0.8	16	0	-0.4	0.4	14	0.2	-0.4	0.9	30	0.40823	1
B9EJ29_MOUSE,	0.1	-0.2	0.4	33	0.3	-0.1	0.6	25	-0.2	-0.6	0.3	58	0.40857	1
Q544M1_MOUSE,LY6H_MOUSE,Q8K356_MOUSE,	1	0.6	1.4	11	1.2	0.9	1.6	13	-0.2	-0.7	0.3	24	0.41383	1
Q8K232_MOUSE,ADDA_MOUSE,	1.7	1.2	2.2	14	1.9	1.5	2.4	14	-0.3	-0.9	0.4	28	0.41587	1
CMC1_MOUSE,	-1.4	-1.5	-1.2	113	-1.3	-1.5	-1.1	126	-0.1	-0.3	0.1	239	0.41696	1
LPPRC_MOUSE,	0.2	-0.1	0.5	43	0.3	0	0.6	39	-0.1	-0.5	0.2	82	0.41784	1
CD47_MOUSE,Q3U967_MOUSE,	-0.5	-0.8	-0.3	43	-0.4	-0.7	-0.1	39	-0.1	-0.5	0.2	82	0.41842	1
USO1_MOUSE,	0.1	-0.3	0.4	17	0.2	-0.1	0.6	18	-0.2	-0.7	0.3	35	0.41872	1
KPYM_MOUSE,	-1	-1.5	-0.4	9	-1.2	-1.9	-0.6	6	0.3	-0.5	1.1	15	0.42223	1
FFR_MOUSE,	-0.2	-0.6	0.2	18	0	-0.5	0.4	12	-0.2	-0.8	0.4	30	0.42261	1
S7A14_MOUSE,	1.8	1.3	2.3	8	2.2	1.5	2.8	10	-0.3	-1.2	0.5	18	0.42268	1
Q3UFQ5_MOUSE,	0.2	-0.3	0.7	11	0.5	-0.2	1.2	5	-0.3	-1.1	0.5	16	0.42285	1
GNAI3_MOUSE,	-0.4	-0.7	-0.1	22	-0.2	-0.6	0.1	22	-0.2	-0.6	0.3	44	0.42396	1
NGEF_MOUSE,	-0.7	-1.1	-0.3	16	-0.9	-1.3	-0.5	19	0.2	-0.4	0.8	35	0.4253	1
ABHD6_MOUSE,Q9D375_MOUSE,	-0.4	-0.8	-0.1	21	-0.3	-0.6	0.1	21	-0.2	-0.6	0.3	42	0.4258	1
AINX_MOUSE,	0.5	-0.1	1.1	9	0.8	0.2	1.5	9	-0.3	-1.2	0.5	18	0.42666	1
RL13_MOUSE,	-0.5	-0.9	-0.1	15	-0.3	-0.7	0.1	15	-0.2	-0.7	0.3	30	0.42716	1
HNRPK_MOUSE,Q3U9Q3_MOUSE,Q3TJ38_MOUSE,B2M1R6_MOUSE,Q3U6X2_MOUSE,Q3TL71_MOUSE,Q5FWJ5_MOUSE,Q3TUA1_MOUSE,	0	-0.6	0.5	10	0.2	-0.3	0.7	9	-0.3	-1	0.4	19	0.42767	1
LGI1_MOUSE,	2	1.5	2.6	8	1.6	0.9	2.5	6	0.4	-0.6	1.3	14	0.42835	1
PI51C_MOUSE,	0.7	0.4	1.1	21	0.9	0.5	1.3	18	-0.2	-0.7	0.3	39	0.42874	1
Q3UYM8_MOUSE,MYPR_MOUSE,	-0.8	-0.9	-0.6	133	-0.9	-1	-0.7	126	0.1	-0.1	0.3	259	0.42908	1
B2KGT6_MOUSE,MAP2_MOUSE,	1.2	0.8	1.6	16	1.1	0.7	1.4	20	0.2	-0.3	0.7	36	0.43016	1
BIG3_MOUSE,	-0.3	-1.2	0.6	4	-0.8	-1.5	-0.1	7	0.4	-0.7	1.6	11	0.43045	1
ALDOA_MOUSE,A6ZI44_MOUSE,Q5FWB7_MOUSE,	2	1.7	2.3	24	2.2	1.9	2.5	27	-0.1	-0.5	0.2	51	0.4317	1
MTCH1_MOUSE,	-0.8	-1.1	-0.6	37	-0.7	-1	-0.4	36	-0.1	-0.5	0.2	73	0.43179	1
PSMD1_MOUSE,	1.1	0.7	1.5	17	1.3	0.8	1.8	15	-0.2	-0.8	0.4	32	0.43481	1
K6PP_MOUSE,Q8C605_MOUSE,	1	0.8	1.2	101	0.9	0.7	1.1	69	0.1	-0.2	0.3	170	0.43508	1
Q3TWJ4_MOUSE,Q3ULF7_MOUSE,ARP3_MOUSE,	3.2	2.8	3.6	12	3.4	2.9	3.9	11	-0.2	-0.8	0.4	23	0.43532	1
KCC2D_MOUSE,	-1.1	-1.3	-0.9	94	-1	-1.2	-0.8	85	-0.1	-0.4	0.2	179	0.43546	1
VATH_MOUSE,	0	-0.2	0.2	68	0.1	-0.1	0.3	57	-0.1	-0.4	0.2	125	0.43642	1
KPRB_MOUSE,Q8BK37_MOUSE,Q5SWZ0_MOUSE,	2.3	1.8	2.7	12	2.6	1.9	3.1	12	-0.3	-1	0.5	24	0.43644	1
CAPS2_MOUSE,A4PI81_MOUSE,	-0.1	-0.4	0.2	26	0	-0.3	0.4	27	-0.2	-0.6	0.3	53	0.4375	1
Q4FE56_MOUSE,A2AD18_MOUSE,	0.4	0.1	0.7	35	0.5	0.2	0.8	43	-0.1	-0.5	0.3	78	0.43884	1
SFXN1_MOUSE,	-1.1	-1.4	-0.8	29	-1	-1.3	-0.7	33	-0.1	-0.5	0.2	62	0.43893	1
Q3TN61_MOUSE,Q4VAE6_MOUSE,RHOA_MOUSE,	0.3	0	0.6	29	0.1	-0.2	0.4	22	0.2	-0.3	0.6	51	0.44093	1
AP180_MOUSE,	0.1	-0.1	0.3	68	0.2	0	0.4	69	-0.1	-0.3	0.2	137	0.44145	1
TCPR1_MOUSE,	1.4	0.6	2.5	2	2	1.1	3.1	2	-0.5	-1.9	0.9	4	0.44158	1
Q5DQJ3_MOUSE,CAZA2_MOUSE,	2.4	2	2.8	16	2.6	2.2	3	12	-0.2	-0.7	0.3	28	0.44205	1
DIRA1_MOUSE,	0.4	-0.2	1	9	0	-0.7	0.8	6	0.4	-0.6	1.3	15	0.44234	1
AP2A1_MOUSE,	0	-0.2	0.1	152	0	-0.1	0.2	116	-0.1	-0.3	0.1	268	0.44342	1
ATLA2_MOUSE,Q8BYP9_MOUSE,	-0.1	-0.5	0.3	14	0.1	-0.3	0.6	10	-0.2	-0.8	0.4	24	0.44454	1
TMX1_MOUSE,	-0.3	-1.1	0.4	5	0	-0.7	0.8	5	-0.4	-1.4	0.6	10	0.44583	1
Q3U9D6_MOUSE,EXOC6_MOUSE,	0.2	-0.6	1.2	4	0.8	-0.3	1.9	2	-0.5	-2	0.9	6	0.44689	1
KTN1_MOUSE,	-0.2	-0.5	0.2	15	-0.4	-1	0.2	9	0.2	-0.4	0.9	24	0.44757	1
B1AV07_MOUSE,GPC4_MOUSE,	1.7	1.1	2.5	7	2.1	1.5	2.8	11	-0.3	-1.2	0.6	18	0.44772	1
Q3UW40_MOUSE,RL24_MOUSE,	0	-0.8	0.9	3	-0.5	-1.2	0.4	10	0.4	-0.7	1.5	13	0.44799	1
RL18_MOUSE,Q642K1_MOUSE,Q58EW0_MOUSE,	0.1	-0.3	0.5	13	0.3	-0.2	0.7	10	-0.2	-0.8	0.4	23	0.45007	1
A2RRJ4_MOUSE,XPO5_MOUSE,	-0.6	-1.1	-0.1	9	-0.3	-0.9	0.2	7	-0.3	-1	0.5	16	0.45293	1
SC31A_MOUSE,	0.4	-0.1	0.9	16	0.6	0.2	1	17	-0.2	-0.8	0.4	33	0.45345	1
HOME1_MOUSE,	-0.8	-1.3	-0.2	8	-1.1	-1.9	-0.3	4	0.3	-0.6	1.3	12	0.45601	1
ACTZ_MOUSE,	0.7	0.4	1	24	0.5	0.1	1	14	0.2	-0.4	0.7	38	0.45676	1
ENOA_MOUSE,Q5FW97_MOUSE,	3.8	3.5	4.1	39	4	3.7	4.2	43	-0.1	-0.5	0.3	82	0.45733	1
Q8CFX3_MOUSE,	-0.1	-0.5	0.2	24	0	-0.3	0.4	21	-0.2	-0.6	0.3	45	0.45799	1
STX1B_MOUSE,	-0.5	-0.7	-0.3	86	-0.6	-0.8	-0.4	77	0.1	-0.2	0.3	163	0.45885	1
S4A10_MOUSE,B1AWV8_MOUSE,	-1.3	-1.6	-1	29	-1.2	-1.5	-0.9	30	-0.1	-0.5	0.3	59	0.46159	1
REEP1_MOUSE,	-0.2	-0.8	0.4	7	0.3	-0.9	1.5	2	-0.5	-1.9	0.9	9	0.46604	1
Q3TPX5_MOUSE,RASM_MOUSE,	-0.6	-1.3	0.2	4	-0.9	-1.5	-0.3	5	0.3	-0.6	1.3	9	0.46649	1
LDHB_MOUSE,	-0.1	-0.6	0.3	9	-0.4	-0.9	0.1	10	0.2	-0.4	0.9	19	0.46716	1
SYUA_MOUSE,	0.5	0	1	8	0.3	-0.3	0.8	11	0.2	-0.4	1	19	0.46758	1
B2RXR3_MOUSE,B7ZWL1_MOUSE,CNOT1_MOUSE,	-0.3	-1.1	0.4	4	-0.8	-1.7	0.3	5	0.4	-0.9	1.6	9	0.46787	1
NEUA_MOUSE,	0.9	0.4	1.4	7	1.2	0.5	2	8	-0.3	-1.3	0.6	15	0.46825	1
Q3TDM8_MOUSE,B2M0S2_MOUSE,SCAM3_MOUSE,Q3TUV6_MOUSE,Q3UK26_MOUSE,Q3UXS0_MOUSE,	0.4	-0.1	1	10	0.7	0.1	1.3	6	-0.3	-1.1	0.5	16	0.46928	1
A2AMI2_MOUSE,IF4G3_MOUSE,	-1.1	-1.8	-0.3	8	-0.6	-1.8	0.5	4	-0.5	-1.8	1.2	12	0.46946	1
Q8BQW4_MOUSE,RHG01_MOUSE,A2AGT9_MOUSE,	0.5	0.1	0.8	18	0.6	0.3	0.9	29	-0.2	-0.6	0.3	47	0.47005	1
TCPE_MOUSE,	1.5	0.9	2.1	4	1.8	1.2	2.4	6	-0.3	-1.1	0.5	10	0.47157	1
OXR1_MOUSE,	0.8	0.3	1.3	8	1.1	0.5	1.6	9	-0.3	-1	0.5	17	0.47168	1
A2APW8_MOUSE,SNAB_MOUSE,	1.2	1	1.5	41	1.1	0.9	1.4	51	0.1	-0.2	0.4	92	0.47206	1
Q3TIQ2_MOUSE,Q5BLK0_MOUSE,Q8C2K0_MOUSE,RL12_MOUSE,	1.2	0.6	1.8	4	1.5	0.9	2.1	4	-0.3	-1.1	0.5	8	0.47211	1
NFL_MOUSE,Q05DD2_MOUSE,	0.1	-0.3	0.4	21	0.2	-0.2	0.7	14	-0.2	-0.7	0.3	35	0.47303	1
ROGDI_MOUSE,	0.4	-0.1	0.8	9	0.6	0.1	1	13	-0.2	-0.8	0.4	22	0.47342	1
MYO1D_MOUSE,	0	-0.7	0.7	6	-0.4	-1.3	0.5	4	0.4	-0.7	1.5	10	0.47385	1
DRG2_MOUSE,	0.2	-0.3	0.7	12	0	-0.6	0.5	9	0.3	-0.5	1	21	0.47391	1
ANK2_MOUSE,	1.2	1	1.4	87	1.3	1	1.5	80	-0.1	-0.4	0.2	167	0.47548	1
Q3UC51_MOUSE,Q8C4P7_MOUSE,Q3UG68_MOUSE,OST48_MOUSE,	-0.6	-1.1	-0.2	10	-0.5	-0.8	-0.1	17	-0.2	-0.7	0.4	27	0.47607	1
A3QM89_MOUSE,Q7M6W1_MOUSE,	0.1	-0.1	0.4	32	0.3	0	0.5	29	-0.1	-0.5	0.3	61	0.47639	1
GNA12_MOUSE,	-0.1	-0.9	0.7	3	-0.4	-1	0.1	5	0.3	-0.6	1.2	8	0.47736	1
K1C14_MOUSE,	5.8	5.5	6.1	27	6	5.6	6.3	33	-0.1	-0.6	0.3	60	0.47797	1
UBP5_MOUSE,Q3U4W8_MOUSE,	1.2	0.9	1.6	18	1.4	1	1.7	20	-0.2	-0.6	0.3	38	0.47849	1
SF3B1_MOUSE,	-0.4	-0.8	0.1	15	-0.2	-0.7	0.3	14	-0.2	-0.8	0.4	29	0.47883	1
Q5KU03_MOUSE,GSK3B_MOUSE,	0.1	-0.4	0.7	9	0.4	-0.1	0.9	11	-0.3	-1	0.5	20	0.47908	1
KI21A_MOUSE,	1.4	0.8	1.9	14	1.6	1.1	2.2	10	-0.3	-1	0.5	24	0.48067	1
1433F_MOUSE,	1.1	0.9	1.4	33	1.3	0.9	1.6	24	-0.1	-0.5	0.3	57	0.48126	1
MYO1B_MOUSE,Q80VD8_MOUSE,Q7TQD7_MOUSE,	-1.5	-2.4	-0.6	5	-1	-1.9	-0.1	3	-0.4	-1.7	0.8	8	0.48252	1
Q6NZM3_MOUSE,	0.3	0	0.6	36	0.4	0.1	0.7	32	-0.1	-0.5	0.3	68	0.4827	1
CY1_MOUSE,	-1.4	-1.6	-1.2	52	-1.3	-1.5	-1.1	41	-0.1	-0.4	0.2	93	0.48414	1
VPS35_MOUSE,Q3TRJ1_MOUSE,	3.3	3	3.6	34	3.4	3.1	3.7	36	-0.1	-0.5	0.3	70	0.48527	1
EXOG_MOUSE,	-1.2	-1.5	-0.9	27	-1.3	-1.6	-1	16	0.1	-0.3	0.6	43	0.48625	1
CD9_MOUSE,	-0.2	-1	0.6	3	-0.6	-1.3	0.1	3	0.3	-0.7	1.4	6	0.48757	1
LRP1_MOUSE,	-0.4	-0.9	0.1	14	-0.2	-0.7	0.4	9	-0.2	-0.9	0.5	23	0.48769	1
H2AY_MOUSE,	-0.2	-0.5	0.1	23	0	-0.4	0.3	27	-0.1	-0.6	0.3	50	0.488	1
SPCS3_MOUSE,	0.2	-0.8	1.1	2	0.6	-0.3	1.5	2	-0.4	-1.8	0.9	4	0.49259	1
Q3U1V3_MOUSE,ARBK1_MOUSE,Q7TS64_MOUSE,	0.5	0	1	14	0.7	0.3	1.1	14	-0.2	-0.8	0.4	28	0.49619	1
Q6PGG8_MOUSE,TDRKH_MOUSE,	-1.1	-2	-0.2	4	-0.7	-1.6	0.2	3	-0.4	-1.6	0.8	7	0.49715	1
A2ALV3_MOUSE,	1	0.6	1.4	17	0.9	0.5	1.2	16	0.2	-0.3	0.7	33	0.49943	1
K1C17_MOUSE,	5.8	5.4	6.3	20	6	5.7	6.3	29	-0.2	-0.7	0.4	49	0.49944	1
B1AWV9_MOUSE,B1AWV7_MOUSE,Q8C943_MOUSE,	-1.3	-1.6	-1	30	-1.2	-1.5	-0.9	30	-0.1	-0.5	0.3	60	0.49959	1
Q3UWU7_MOUSE,DIRA2_MOUSE,	-0.2	-0.6	0.2	15	-0.4	-0.8	0	17	0.2	-0.4	0.7	32	0.49974	1
NMDE2_MOUSE,	-0.9	-1.1	-0.6	38	-0.7	-1	-0.5	35	-0.1	-0.5	0.3	73	0.4999	1
OPALI_MOUSE,Q3USW3_MOUSE,	-1.5	-2.3	-0.7	3	-1.1	-1.9	-0.3	4	-0.4	-1.5	0.7	7	0.50129	1
Q3U6D7_MOUSE,SNG1_MOUSE,	0.2	-0.2	0.6	12	0.4	0	0.7	16	-0.2	-0.7	0.4	28	0.50298	1
NDRG4_MOUSE,	0.6	0.1	1	14	0.8	0.2	1.3	8	-0.2	-0.9	0.5	22	0.50322	1
AP3B1_MOUSE,	0.2	-0.3	0.8	8	0.5	-0.2	1.3	5	-0.3	-1.2	0.6	13	0.50369	1
PLCL2_MOUSE,	-0.6	-1.4	0.1	6	-1	-1.7	-0.2	6	0.3	-0.7	1.4	12	0.50476	1
SCOT1_MOUSE,Q3UK61_MOUSE,	-2.5	-3.4	-1.6	2	-2.2	-2.8	-1.6	6	-0.3	-1.4	0.7	8	0.5075	1
Q6GTI5_MOUSE,IMB1_MOUSE,Q3TFE8_MOUSE,	0.3	0.1	0.6	42	0.2	0	0.5	31	0.1	-0.2	0.4	73	0.50765	1
Q3ULT2_MOUSE,ACTN4_MOUSE,	0.2	0	0.5	52	0.3	0.1	0.6	47	-0.1	-0.4	0.2	99	0.50859	1
MFF_MOUSE,	-1	-1.3	-0.7	27	-0.9	-1.2	-0.6	33	-0.1	-0.5	0.3	60	0.50925	1
FAF2_MOUSE,	-0.8	-1.4	-0.2	6	-0.5	-1.1	0	10	-0.3	-1.1	0.6	16	0.50934	1
Q2KHT0_MOUSE,	-0.2	-0.6	0.1	34	-0.4	-0.7	0	27	0.1	-0.3	0.6	61	0.50948	1
ATLA1_MOUSE,	-0.2	-0.4	0.1	48	-0.1	-0.3	0.1	56	-0.1	-0.4	0.2	104	0.51064	1
Q3UVV3_MOUSE,Q5SYH5_MOUSE,OMGP_MOUSE,	0.1	-0.2	0.4	23	0.2	-0.1	0.6	19	-0.1	-0.6	0.3	42	0.51105	1
Q8BM84_MOUSE,Q8BTQ1_MOUSE,Q8BVF8_MOUSE,Q8BW03_MOUSE,Q3UFF9_MOUSE,Q78QY3_MOUSE,	-0.1	-0.8	0.5	6	0.2	-0.4	0.8	5	-0.3	-1.1	0.6	11	0.51312	1
Q8CAB3_MOUSE,B1AVY2_MOUSE,GBRA3_MOUSE,B1B015_MOUSE,	0	-0.5	0.5	13	0.2	-0.5	0.9	6	-0.3	-1.1	0.6	19	0.51389	1
CBR1_MOUSE,B2RXY7_MOUSE,	3	2.6	3.5	17	3.3	2.5	3.9	17	-0.2	-1	0.6	34	0.51507	1
Q9DC36_MOUSE,Q8CDE0_MOUSE,FLOT2_MOUSE,	0.2	-0.1	0.4	40	0.3	0	0.6	28	-0.1	-0.5	0.3	68	0.51648	1
CTNB1_MOUSE,Q3UZT7_MOUSE,	0.4	0.1	0.7	26	0.3	-0.1	0.6	19	0.1	-0.3	0.6	45	0.51972	1
MBLC2_MOUSE,	0.5	0	0.9	10	0.3	-0.2	0.7	9	0.2	-0.4	0.8	19	0.52012	1
Q9D7D9_MOUSE,Q99LS5_MOUSE,	-0.6	-1.7	0.5	3	-0.2	-1.1	0.8	2	-0.5	-1.9	1.1	5	0.52024	1
AGK_MOUSE,	-1.7	-2	-1.4	22	-1.6	-1.9	-1.2	20	-0.1	-0.6	0.3	42	0.52096	1
IP3KA_MOUSE,	0.1	-0.3	0.6	14	0.3	-0.2	0.9	9	-0.2	-0.9	0.5	23	0.52139	1
NEGR1_MOUSE,A0A4W9_MOUSE,	0.1	-0.2	0.4	24	0.2	-0.1	0.6	19	-0.1	-0.6	0.3	43	0.52143	1
Q1WIL9_MOUSE,CADM1_MOUSE,	0.3	-0.1	0.6	33	0.1	-0.1	0.4	32	0.1	-0.3	0.5	65	0.52166	1
Q790I0_MOUSE,SYVC_MOUSE,Q7TPT7_MOUSE,	0.1	-0.3	0.5	21	-0.1	-0.4	0.3	25	0.1	-0.3	0.6	46	0.5235	1
AT5F1_MOUSE,Q5I0W0_MOUSE,	-1.4	-1.6	-1.2	70	-1.3	-1.5	-1.1	50	-0.1	-0.3	0.2	120	0.52383	1
Q6AXH6_MOUSE,ABI2_MOUSE,Q6AXD2_MOUSE,	0.6	-0.1	1.3	4	0.3	-0.5	1.1	3	0.3	-0.7	1.4	7	0.52435	1
A2AFW7_MOUSE,Q3UA17_MOUSE,MTCH2_MOUSE,	-1.5	-1.7	-1.2	29	-1.4	-1.6	-1.1	30	-0.1	-0.4	0.3	59	0.52526	1
Q1MXF8_MOUSE,SCN2B_MOUSE,	-0.6	-0.9	-0.3	28	-0.5	-0.8	-0.2	27	-0.1	-0.5	0.3	55	0.52603	1
RS9_MOUSE,	-0.2	-0.5	0.1	15	-0.1	-0.4	0.3	13	-0.1	-0.6	0.3	28	0.52733	1
HMOX2_MOUSE,Q544R7_MOUSE,	-0.2	-0.5	0	30	-0.3	-0.7	0	26	0.1	-0.3	0.5	56	0.52859	1
Q8VDX7_MOUSE,	1.2	1	1.4	61	1.1	0.9	1.3	48	0.1	-0.2	0.4	109	0.52929	1
Q3ZB60_MOUSE,	-1.6	-2	-1.3	17	-1.8	-2.1	-1.4	18	0.1	-0.3	0.6	35	0.53106	1
Q3UL45_MOUSE,	-1.5	-1.9	-1.2	14	-1.4	-1.7	-1.1	19	-0.1	-0.6	0.3	33	0.53107	1
GRIN1_MOUSE,	-0.4	-0.9	0.1	10	-0.2	-0.7	0.2	12	-0.2	-0.9	0.5	22	0.53154	1
Q8K133_MOUSE,Q0PD31_MOUSE,RAB24_MOUSE,	-0.7	-1.2	-0.1	7	-0.5	-1	0.1	6	-0.2	-1	0.5	13	0.53259	1
Q9DC13_MOUSE,Q8VH34_MOUSE,LAMP1_MOUSE,Q3TX84_MOUSE,Q3TA96_MOUSE,	0.2	-0.4	0.7	8	-0.1	-0.7	0.6	7	0.3	-0.6	1.1	15	0.5351	1
NU4M_MOUSE,Q7JCZ9_MOUSE,Q5GA75_MUSMM,B9V1K8_MOUSE,Q7JCY6_MOUSE,A3R4A0_MUSMM,Q9ME04_MOUSE,	-1.5	-1.8	-1.2	25	-1.4	-1.7	-1.1	27	-0.1	-0.5	0.3	52	0.53551	1
UBE4B_MOUSE,Q80TU3_MOUSE,Q6DID4_MOUSE,Q6NWW1_MOUSE,B2KFK2_MOUSE,	-0.1	-1.1	0.9	4	-0.4	-1.1	0.2	7	0.4	-0.8	1.5	11	0.53589	1
MPP2_MOUSE,B1AQF9_MOUSE,	-0.8	-1.5	-0.2	9	-1.1	-1.9	-0.3	3	0.3	-0.7	1.3	12	0.53759	1
B2RWT9_MOUSE,PLXB1_MOUSE,	-0.6	-1.4	0.2	7	-0.2	-1.3	1	3	-0.4	-1.9	1	10	0.53794	1
Q3U6S1_MOUSE,Q3TWV0_MOUSE,Q3TFD9_MOUSE,Q5FWJ3_MOUSE,VIME_MOUSE,	-0.3	-1	0.4	5	0.1	-0.9	1.2	2	-0.4	-1.7	0.9	7	0.53811	1
FAK1_MOUSE,	-1	-1.9	-0.1	4	-0.6	-1.4	0.1	7	-0.3	-1.5	0.8	11	0.53919	1
Q5RKP4_MOUSE,RPN1_MOUSE,	-0.7	-0.9	-0.4	35	-0.6	-0.8	-0.3	35	-0.1	-0.4	0.2	70	0.53926	1
CHRD1_MOUSE,	0.5	-0.3	1.2	4	0.8	0.1	1.4	4	-0.3	-1.3	0.7	8	0.54	1
EHD3_MOUSE,	0.5	0.3	0.8	35	0.6	0.4	0.9	35	-0.1	-0.4	0.3	70	0.54141	1
BCR_MOUSE,	1.3	0.8	1.9	11	1.1	0.4	1.8	10	0.2	-0.6	1.1	21	0.54154	1
RAB14_MOUSE,Q50HX2_MOUSE,Q50HX4_MOUSE,	-0.5	-0.7	-0.3	46	-0.4	-0.6	-0.2	51	-0.1	-0.4	0.2	97	0.54225	1
IRGM_MOUSE,Q5NCB5_MOUSE,	-1.4	-2.3	-0.5	4	-1	-1.9	-0.1	5	-0.4	-1.6	0.9	9	0.54334	1
Q6ZQK4_MOUSE,	-0.2	-0.5	0.2	20	0	-0.4	0.4	17	-0.2	-0.7	0.4	37	0.54341	1
NB5R1_MOUSE,	-0.1	-0.5	0.2	23	0	-0.3	0.3	24	-0.1	-0.6	0.3	47	0.54483	1
Q6A0A4_MOUSE,Q8R1E1_MOUSE,LGAT1_MOUSE,Q3UZK0_MOUSE,	-0.7	-1.2	-0.2	8	-0.5	-1	-0.1	11	-0.2	-0.9	0.5	19	0.54492	1
NDUV1_MOUSE,	-1	-1.4	-0.6	10	-1.2	-1.7	-0.7	7	0.2	-0.5	0.8	17	0.54552	1
Q3U7Z6_MOUSE,PGAM1_MOUSE,	3.6	3.3	3.9	32	3.5	3.2	3.8	22	0.1	-0.3	0.5	54	0.54737	1
Q5M9M5_MOUSE,RL23A_MOUSE,Q4V9X9_MOUSE,	1.2	0.6	1.9	4	0.8	-0.1	2.3	3	0.4	-1.2	1.5	7	0.54741	1
Q3US81_MOUSE,	-0.7	-0.9	-0.5	74	-0.8	-1	-0.6	79	0.1	-0.2	0.3	153	0.54774	1
Q6GTG6_MOUSE,ACSL1_MOUSE,	-1	-1.3	-0.6	20	-0.8	-1.2	-0.5	21	-0.1	-0.6	0.3	41	0.54823	1
Q3TGX0_MOUSE,SCAM4_MOUSE,Q3U4R0_MOUSE,	0.6	-0.4	1.6	2	0.2	-0.8	1.1	2	0.4	-1	1.8	4	0.54909	1
UBXN6_MOUSE,	0.6	0	1.2	5	0.3	-0.3	1	5	0.3	-0.6	1.1	10	0.54928	1
Q6P1F5_MOUSE,Q9D689_MOUSE,Q6ZQ77_MOUSE,Q3UJ14_MOUSE,	-0.6	-0.9	-0.3	31	-0.5	-0.9	-0.1	19	-0.1	-0.6	0.3	50	0.5493	1
Q71LX8_MOUSE,	0.6	0.4	0.7	89	0.6	0.4	0.8	98	-0.1	-0.3	0.2	187	0.55008	1
A2AMV7_MOUSE,Q923G3_MOUSE,A2AMW0_MOUSE,	3	2.6	3.5	17	3.2	2.8	3.6	15	-0.2	-0.8	0.4	32	0.55066	1
CR019_MOUSE,	-0.9	-1.4	-0.3	8	-0.6	-1.3	0.1	5	-0.3	-1.1	0.6	13	0.55094	1
KCNA2_MOUSE,B2RS05_MOUSE,	-0.8	-1.2	-0.4	12	-1	-1.4	-0.6	13	0.2	-0.4	0.7	25	0.55133	1
B2RQY8_MOUSE,Q7TNG0_MOUSE,SPG7_MOUSE,	-1.1	-1.5	-0.6	13	-1.4	-2.3	-0.5	4	0.3	-0.7	1.3	17	0.55408	1
B2RSI2_MOUSE,SORC2_MOUSE,Q8CHA4_MOUSE,	1.8	1.2	2.3	12	1.9	1.3	2.8	10	-0.3	-1.3	0.7	22	0.5542	1
RAB6B_MOUSE,Q0PD53_MOUSE,	-0.3	-0.6	0	31	-0.2	-0.5	0.1	20	-0.1	-0.5	0.3	51	0.55487	1
BRSK2_MOUSE,	0	-0.6	0.5	9	-0.3	-0.9	0.4	7	0.2	-0.6	1	16	0.55503	1
Q3UHP1_MOUSE,DTNA_MOUSE,Q8CFR5_MOUSE,	0.5	-0.2	1.1	5	0.9	-0.3	1.8	5	-0.3	-1.5	0.9	10	0.55539	1
KAP3_MOUSE,	-0.5	-0.9	-0.1	15	-0.4	-0.7	-0.1	20	-0.1	-0.6	0.4	35	0.55594	1
PTPRS_MOUSE,	-0.2	-0.5	0.1	40	-0.3	-0.6	0	32	0.1	-0.3	0.5	72	0.5561	1
SAM50_MOUSE,	-1.2	-1.5	-0.9	25	-1.1	-1.3	-0.9	38	-0.1	-0.5	0.3	63	0.55792	1
ENTP2_MOUSE,Q921R1_MOUSE,Q3T9U8_MOUSE,	-0.2	-0.7	0.4	7	-0.4	-1	0.2	8	0.2	-0.6	1	15	0.5596	1
AP1G1_MOUSE,Q3UKX8_MOUSE,Q8CBB7_MOUSE,	-0.2	-0.5	0.2	20	0	-0.4	0.3	26	-0.1	-0.6	0.3	46	0.5605	1
Q6S387_MOUSE,Q6S388_MOUSE,Q6S385_MOUSE,Q6S392_MOUSE,PLEC1_MOUSE,Q6S393_MOUSE,	0	-0.5	0.4	15	0.1	-0.2	0.4	48	-0.2	-0.7	0.4	63	0.56098	1
Q9MD68_MOUSE,Q5GA82_MUSMM,Q70YN3_MOUSE,Q7JD04_MOUSE,A3R454_MUSMC,A3E4A9_MOUSE,	-0.9	-1.3	-0.4	13	-1	-1.5	-0.6	16	0.2	-0.4	0.8	29	0.56155	1
XPO7_MOUSE,	0	-0.3	0.3	24	0.1	-0.2	0.4	28	-0.1	-0.5	0.3	52	0.56165	1
A2ANS4_MOUSE,HS12B_MOUSE,	0.6	-0.1	1.2	5	0.9	0.2	1.5	6	-0.3	-1.1	0.6	11	0.56541	1
ODO2_MOUSE,	-1.2	-1.7	-0.8	11	-1.1	-1.6	-0.5	6	-0.2	-0.8	0.5	17	0.56678	1
TRIO_MOUSE,	-0.1	-0.6	0.3	16	-0.3	-0.8	0.2	14	0.2	-0.5	0.8	30	0.56817	1
Q8C845_MOUSE,	0.3	-0.3	0.9	8	0.1	-0.4	0.6	8	0.2	-0.6	1	16	0.56889	1
RL14_MOUSE,	0.4	0	0.8	17	0.3	-0.2	0.7	13	0.2	-0.4	0.7	30	0.56964	1
Q91YK1_MOUSE,Q8C140_MOUSE,CMC2_MOUSE,	-1.3	-1.8	-0.9	9	-1.2	-1.5	-0.8	13	-0.2	-0.7	0.4	22	0.56988	1
Q3USC7_MOUSE,GD1L1_MOUSE,	0.3	0	0.5	27	0.4	0.1	0.6	26	-0.1	-0.5	0.3	53	0.56998	1
Q571J7_MOUSE,2ABA_MOUSE,Q9CWU3_MOUSE,Q3TT94_MOUSE,Q3TPC5_MOUSE,	2.8	2.2	3.5	8	2.6	2	3.2	5	0.2	-0.7	1.1	13	0.57007	1
HD_MOUSE,	-0.5	-0.9	-0.1	26	-0.3	-0.7	0	33	-0.1	-0.6	0.4	59	0.57021	1
Q8CA58_MOUSE,	-0.8	-1.3	-0.4	12	-1	-1.4	-0.6	13	0.2	-0.4	0.7	25	0.57063	1
UAP56_MOUSE,	-0.2	-0.6	0.2	15	0	-0.4	0.3	14	-0.2	-0.7	0.4	29	0.57071	1
GRIK2_MOUSE,A3KMF0_MOUSE,A3KMF1_MOUSE,	-0.7	-1.4	0.1	5	-0.9	-1.5	-0.3	9	0.3	-0.7	1.2	14	0.57119	1
Q6P1F7_MOUSE,Q8VI14_MOUSE,Q9D393_MOUSE,Q6P1Z8_MOUSE,	-1	-1.7	-0.3	4	-0.7	-1.5	0	7	-0.3	-1.2	0.7	11	0.5715	1
LIGO1_MOUSE,A9DA50_MOUSE,	-0.6	-1	-0.2	18	-0.5	-0.9	-0.1	15	-0.1	-0.7	0.4	33	0.57166	1
A2AA49_MOUSE,Q3UE40_MOUSE,GNA13_MOUSE,	-0.2	-0.6	0.2	17	-0.1	-0.4	0.3	22	-0.1	-0.6	0.4	39	0.57282	1
C1TM_MOUSE,	0.3	-0.2	0.8	10	0.5	-0.1	1.1	8	-0.2	-1	0.6	18	0.57342	1
S4A8_MOUSE,	-1.2	-1.6	-0.7	12	-1	-1.5	-0.5	9	-0.2	-0.8	0.5	21	0.57354	1
PI42B_MOUSE,Q3UJ95_MOUSE,	1.5	0.8	2.3	4	1.8	1.2	2.3	6	-0.3	-1.2	0.7	10	0.57406	1
A2AMQ4_MOUSE,CDS2_MOUSE,	-0.2	-0.6	0.2	15	0	-0.5	0.4	13	-0.2	-0.7	0.4	28	0.57524	1
SCMC2_MOUSE,	-0.9	-1.4	-0.4	7	-1.1	-1.6	-0.5	12	0.2	-0.5	1	19	0.57552	1
Q3U3J6_MOUSE,A2ALA6_MOUSE,SURF1_MOUSE,	-1.2	-1.9	-0.6	5	-1.6	-2.6	-0.5	2	0.3	-0.9	1.5	7	0.57581	1
AP3M2_MOUSE,	0.4	-0.1	0.8	13	0.5	0.1	1	12	-0.2	-0.8	0.5	25	0.5769	1
LTMD1_MOUSE,	-1.8	-2.2	-1.4	12	-1.7	-2	-1.3	17	-0.1	-0.6	0.4	29	0.57716	1
K22O_MOUSE,	6	5.5	6.4	12	6.2	5.4	7	5	-0.2	-1.1	0.7	17	0.57849	1
LRRC7_MOUSE,	-0.5	-1.2	0.3	3	-0.7	-1.8	0.1	6	0.3	-0.8	1.6	9	0.57995	1
KCNA6_MOUSE,	-0.7	-1.2	-0.2	8	-0.9	-1.5	-0.3	6	0.2	-0.6	1	14	0.58073	1
Q14BT4_MOUSE,DDRGK_MOUSE,	0.1	-0.4	0.6	7	0.3	-0.5	1.1	3	-0.3	-1.2	0.7	10	0.58085	1
ERLN2_MOUSE,	0.2	-0.1	0.5	25	0.3	0	0.6	26	-0.1	-0.5	0.3	51	0.58156	1
Q3UBN8_MOUSE,BPNT1_MOUSE,	0.2	-0.3	0.6	14	0.3	-0.1	0.8	14	-0.2	-0.8	0.4	28	0.58246	1
B2M1R7_MOUSE,PCBP2_MOUSE,	0	-0.4	0.3	16	0.1	-0.3	0.5	14	-0.1	-0.6	0.4	30	0.58559	1
LMNB1_MOUSE,	0.1	-0.9	0.9	4	-0.3	-1.1	0.5	4	0.3	-0.9	1.5	8	0.58572	1
Q6PDC2_MOUSE,Q3TFU8_MOUSE,TMED9_MOUSE,	-0.5	-1	-0.1	12	-0.3	-0.9	0.2	9	-0.2	-0.9	0.5	21	0.58625	1
Q9JJE1_MOUSE,MP2K1_MOUSE,Q3TMJ8_MOUSE,Q3U3F4_MOUSE,	0.7	0.4	1	29	0.8	0.5	1	30	-0.1	-0.4	0.3	59	0.58663	1
Q6GQT9_MOUSE,	-0.6	-1	-0.3	19	-0.8	-1.2	-0.4	19	0.1	-0.4	0.6	38	0.58704	1
Q9R1R9_MOUSE,Q9R1R8_MOUSE,RDH11_MOUSE,	-0.2	-0.8	0.4	6	0	-0.6	0.7	5	-0.2	-1.1	0.6	11	0.58721	1
SC22B_MOUSE,	-0.7	-1	-0.4	27	-0.6	-1	-0.3	18	-0.1	-0.5	0.3	45	0.58736	1
Q543F6_MOUSE,CDK5_MOUSE,	1.2	0.7	1.6	13	1	0.5	1.5	9	0.2	-0.5	0.9	22	0.58767	1
K1688_MOUSE,	-0.2	-1.1	0.6	3	-0.5	-1.2	0.2	7	0.3	-0.8	1.4	10	0.58834	1
VP13C_MOUSE,A1ILG8_MOUSE,	0.2	-0.5	1	6	0	-0.5	0.5	15	0.2	-0.6	1.2	21	0.58858	1
Q8C4C9_MOUSE,Q8K037_MOUSE,	-0.3	-1.5	0.7	3	-0.6	-1.3	0.1	4	0.3	-1.2	1.5	7	0.58864	1
A2ALM8_MOUSE,Q3U9U5_MOUSE,BAP31_MOUSE,	-0.4	-0.7	0	16	-0.2	-0.7	0.2	10	-0.1	-0.7	0.4	26	0.58907	1
GAPD1_MOUSE,	0.1	-0.8	0.9	5	-0.3	-1.2	0.7	4	0.3	-0.9	1.6	9	0.58959	1
PCYOX_MOUSE,Q3TVT6_MOUSE,Q3UYP2_MOUSE,	0.1	-0.3	0.5	17	0	-0.4	0.3	16	0.1	-0.4	0.6	33	0.59028	1
IQEC2_MOUSE,	-1.3	-1.6	-1.1	37	-1.4	-1.7	-1.1	31	0.1	-0.3	0.5	68	0.59049	1
CAH4_MOUSE,B1ATZ9_MOUSE,	-1.1	-1.7	-0.5	6	-0.9	-1.6	-0.1	4	-0.2	-1.1	0.7	10	0.59147	1
CYFP2_MOUSE,	0.5	0.3	0.7	66	0.5	0.3	0.7	70	-0.1	-0.3	0.2	136	0.59187	1
B2RWR8_MOUSE,	0.9	0.4	1.4	12	0.7	-0.1	1.6	4	0.2	-0.8	1.2	16	0.59239	1
Q545N7_MOUSE,KCRU_MOUSE,	-0.3	-0.7	0.1	14	-0.2	-0.6	0.2	17	-0.1	-0.6	0.4	31	0.59253	1
PITM2_MOUSE,	-0.4	-0.9	0	16	-0.2	-0.7	0.2	13	-0.2	-0.8	0.5	29	0.59274	1
SYNJ1_MOUSE,	1.4	1.2	1.7	48	1.5	1.2	1.8	48	-0.1	-0.4	0.2	96	0.5928	1
MARK3_MOUSE,Q9JKE5_MOUSE,	0	-0.5	0.6	7	0.2	-0.4	0.9	5	-0.2	-1	0.6	12	0.59309	1
Q9CSK4_MOUSE,A2AKH7_MOUSE,LRC57_MOUSE,Q8JZX5_MOUSE,	0.2	-0.4	0.8	7	0.4	-0.1	1	9	-0.2	-1	0.6	16	0.59335	1
LRRT3_MOUSE,Q4VBX1_MOUSE,	-1.6	-2.6	-0.6	3	-1.9	-2.9	-1	2	0.4	-1	1.8	5	0.59353	1
PSMD6_MOUSE,	2.9	2	4	14	2.6	2	3.3	9	0.3	-0.8	1.6	23	0.59416	1
Q4VA93_MOUSE,	0.3	0	0.6	26	0.4	0.1	0.7	22	-0.1	-0.5	0.3	48	0.59559	1
Q3UHQ5_MOUSE,	0.2	-0.3	0.6	17	0	-0.5	0.5	16	0.2	-0.5	0.8	33	0.59619	1
CYFP1_MOUSE,	0.5	0.2	0.7	43	0.5	0.3	0.8	44	-0.1	-0.4	0.2	87	0.5965	1
A2AQY3_MOUSE,YMEL1_MOUSE,	-1.4	-1.9	-0.8	8	-1.1	-1.8	-0.5	5	-0.2	-1.1	0.6	13	0.59704	1
Q3U6C7_MOUSE,Q3UCC6_MOUSE,SUCB1_MOUSE,	0.2	-0.1	0.5	28	0.3	0	0.6	21	-0.1	-0.5	0.3	49	0.59718	1
ARRB1_MOUSE,	1.8	1.3	2.4	6	1.7	1	2.3	3	0.2	-0.6	1.1	9	0.59743	1
S6A17_MOUSE,	0.1	-0.2	0.4	30	0.2	-0.1	0.5	34	-0.1	-0.5	0.3	64	0.59757	1
A2ASB2_MOUSE,BIEA_MOUSE,	1	0.6	1.4	15	1.1	0.7	1.6	13	-0.1	-0.7	0.4	28	0.59764	1
WAHS7_MOUSE,	0.2	-0.4	0.9	7	0.5	-0.2	1.1	6	-0.2	-1.1	0.7	13	0.59804	1
Q3UM57_MOUSE,CAND2_MOUSE,	0.1	-0.6	0.9	3	0.4	-0.6	1.5	2	-0.3	-1.6	0.9	5	0.59982	1
A2AQN1_MOUSE,GGT7_MOUSE,	-0.1	-0.7	0.4	10	-0.3	-0.9	0.3	8	0.2	-0.6	1	18	0.59996	1
SAHH3_MOUSE,	1.2	0.9	1.6	16	1.1	0.7	1.5	15	0.1	-0.4	0.6	31	0.6002	1
Q91ZE6_MOUSE,Q8VIE5_MOUSE,	0	-0.6	0.5	8	0.2	-0.5	0.9	7	-0.2	-1.1	0.6	15	0.60173	1
STRUM_MOUSE,	0.5	-0.3	1.2	6	0.2	-0.4	0.9	7	0.2	-0.8	1.2	13	0.60236	1
GHC1_MOUSE,	-0.8	-1	-0.5	45	-0.7	-0.9	-0.5	63	-0.1	-0.4	0.2	108	0.6024	1
Q99K69_MOUSE,	0.6	0.4	0.9	34	0.7	0.5	1	28	-0.1	-0.4	0.3	62	0.60353	1
A8XUV6_MOUSE,TCPA2_MOUSE,	1.7	1.5	2.1	29	1.7	1.3	2	22	0.1	-0.3	0.5	51	0.60499	1
SRGP2_MOUSE,	0.5	0.1	0.9	18	0.4	0.1	0.7	24	0.1	-0.4	0.6	42	0.60584	1
Q3UAP1_MOUSE,PREB_MOUSE,	0.1	-1	1	4	-0.2	-1	0.5	6	0.3	-1	1.6	10	0.60587	1
Q2KHL7_MOUSE,	0.3	-0.1	0.6	18	0.4	0	0.7	17	-0.1	-0.6	0.4	35	0.60665	1
Q5M9J8_MOUSE,Q5M9N5_MOUSE,RL28_MOUSE,	0	-0.9	0.9	2	-0.3	-1.1	0.5	3	0.3	-0.9	1.5	5	0.60688	1
Q8R5C0_MOUSE,	-1.4	-1.7	-1.1	19	-1.3	-1.6	-1	14	-0.1	-0.5	0.3	33	0.60711	1
D39U1_MOUSE,	0.3	-0.3	1	7	0.6	-0.1	1.2	6	-0.2	-1.1	0.7	13	0.60762	1
B2RPS1_MOUSE,RAB5B_MOUSE,Q0PD56_MOUSE,	-0.1	-0.5	0.2	21	-0.1	-0.4	0.3	22	-0.1	-0.5	0.3	43	0.60901	1
B1AQZ0_MOUSE,	-0.2	-0.5	0.1	36	-0.1	-0.4	0.2	43	-0.1	-0.5	0.3	79	0.60962	1
Q8BP44_MOUSE,MP2K6_MOUSE,Q543Z5_MOUSE,	0.7	0.1	1.3	7	0.4	-0.2	1.1	5	0.2	-0.7	1.1	12	0.6103	1
RAP2B_MOUSE,Q6ZWR0_MOUSE,	0	-0.4	0.4	17	0.1	-0.3	0.5	15	-0.1	-0.6	0.4	32	0.61034	1
CUL2_MOUSE,Q571A2_MOUSE,	0.7	0.3	1.1	21	0.6	0.2	0.9	20	0.1	-0.4	0.6	41	0.61041	1
MYH14_MOUSE,B3F3T1_MOUSE,	0.1	-0.3	0.6	14	0	-0.5	0.4	11	0.2	-0.5	0.8	25	0.61069	1
TMM65_MOUSE,	-1.5	-2.6	-0.5	2	-1.8	-2.5	-1.2	4	0.3	-0.9	1.5	6	0.61163	1
RAB6A_MOUSE,Q0PD54_MOUSE,	-0.3	-0.6	0	25	-0.2	-0.5	0.1	25	-0.1	-0.5	0.3	50	0.61178	1
A2RT70_MOUSE,TENR_MOUSE,	1.8	1.6	2.1	36	1.8	1.5	2	44	0.1	-0.3	0.4	80	0.61202	1
Q2M4G8_MOUSE,PTN9_MOUSE,	0.8	0.1	1.5	8	1	0.4	1.6	8	-0.2	-1.1	0.7	16	0.61267	1
Q3TB24_MOUSE,	0.4	-0.3	1.2	4	0.1	-0.7	1.1	3	0.3	-0.9	1.5	7	0.61335	1
Q3T1F6_MOUSE,Q3ZB62_MOUSE,	-1.5	-1.8	-1.2	19	-1.6	-1.9	-1.3	22	0.1	-0.3	0.5	41	0.61399	1
Q0VBU4_MOUSE,CC47_MOUSE,	-0.4	-1	0.3	5	-0.6	-1.2	0	6	0.2	-0.7	1.1	11	0.61401	1
TIM50_MOUSE,	-1.4	-1.8	-1.1	16	-1.3	-1.7	-1	17	-0.1	-0.6	0.4	33	0.61407	1
RLA0_MOUSE,Q5M8R8_MOUSE,	-0.2	-0.5	0.1	25	-0.1	-0.4	0.3	19	-0.1	-0.5	0.3	44	0.6143	1
MGST3_MOUSE,	-1.1	-1.8	-0.5	6	-1.4	-2	-0.7	9	0.2	-0.7	1.1	15	0.61468	1
PRS8_MOUSE,B1ARK2_MOUSE,	0.4	-0.2	0.9	9	0.5	-0.1	1.1	5	-0.2	-1	0.6	14	0.6147	1
B9EJ23_MOUSE,CSKP_MOUSE,B7ZP42_MOUSE,	1.1	0.6	1.8	11	0.9	0.1	1.8	5	0.3	-0.8	1.3	16	0.61629	1
K0090_MOUSE,A1L2Z3_MOUSE,	-0.6	-1	-0.3	21	-0.5	-0.9	-0.1	16	-0.1	-0.7	0.4	37	0.61709	1
A2AUA8_MOUSE,Q7TQG7_MOUSE,ADA11_MOUSE,Q3TZE2_MOUSE,	0.1	-0.4	0.6	6	-0.2	-1.1	0.7	2	0.2	-0.8	1.3	8	0.61717	1
CTNA2_MOUSE,	0.5	0.2	0.8	32	0.4	0.1	0.7	37	0.1	-0.3	0.5	69	0.61798	1
SRR_MOUSE,	1.2	0.9	1.6	18	1.1	0.7	1.5	10	0.1	-0.4	0.6	28	0.61802	1
RENR_MOUSE,	-0.3	-0.8	0.2	8	-0.5	-1.3	0.2	3	0.2	-0.7	1.1	11	0.61978	1
PCAT1_MOUSE,	-0.2	-1.1	0.7	2	0.1	-0.9	1.2	4	-0.3	-1.7	1	6	0.62019	1
Q8VCV2_MOUSE,NDRG3_MOUSE,Q544I1_MOUSE,	1	0.1	2	3	1.3	0.6	1.9	6	-0.3	-1.6	1	9	0.62079	1
KCNA3_MOUSE,	-0.8	-1.2	-0.4	11	-0.9	-1.3	-0.5	11	0.1	-0.4	0.7	22	0.62203	1
Q3U026_MOUSE,Q3UME9_MOUSE,MOGS_MOUSE,	-0.1	-0.6	0.5	13	0.1	-0.7	0.9	3	-0.2	-1.2	0.7	16	0.62225	1
FBX41_MOUSE,Q3UGY7_MOUSE,	-0.9	-1.3	-0.4	15	-0.8	-1.1	-0.4	18	-0.1	-0.7	0.4	33	0.62322	1
2A5G_MOUSE,	-0.2	-0.5	0.2	23	-0.1	-0.5	0.3	17	-0.1	-0.6	0.4	40	0.62434	1
NRCAM_MOUSE,	-0.4	-0.7	-0.1	33	-0.5	-0.8	-0.2	26	0.1	-0.3	0.5	59	0.62529	1
GPDM_MOUSE,	-1.4	-1.6	-1.2	87	-1.3	-1.5	-1.2	98	-0.1	-0.3	0.2	185	0.62555	1
A8Y5N3_MOUSE,DHB11_MOUSE,	0	-0.3	0.4	17	0.2	-0.3	0.6	15	-0.1	-0.7	0.4	32	0.62633	1
B2RRH9_MOUSE,GUAA_MOUSE,	1.1	0.6	1.7	9	0.8	0	1.9	5	0.3	-0.9	1.3	14	0.62649	1
Q3UH39_MOUSE,Q3UGZ2_MOUSE,CNTN2_MOUSE,	-1.4	-2.4	-0.5	6	-1.2	-1.9	-0.5	6	-0.3	-1.5	0.8	12	0.62713	1
Q6P9K9_MOUSE,	-0.6	-1	-0.2	19	-0.4	-0.9	0.1	11	-0.1	-0.8	0.5	30	0.62847	1
PI3R4_MOUSE,B2RXR2_MOUSE,	0.1	-0.5	0.7	6	-0.1	-0.6	0.4	10	0.2	-0.6	1	16	0.62934	1
RB11B_MOUSE,Q78ZJ8_MOUSE,	-0.5	-0.9	-0.2	18	-0.4	-0.8	-0.1	18	-0.1	-0.5	0.3	36	0.63091	1
GRM2_MOUSE,	-1.1	-1.8	-0.5	10	-1.3	-1.8	-0.8	8	0.2	-0.6	1	18	0.63115	1
SHPS1_MOUSE,	-0.5	-0.8	-0.2	23	-0.6	-0.9	-0.3	21	0.1	-0.3	0.5	44	0.63156	1
D2KHZ9_MOUSE,G3P_MOUSE,	1.6	1.3	1.9	31	1.7	1.4	2	29	-0.1	-0.5	0.3	60	0.63236	1
Q5NCI4_MOUSE,PGAM2_MOUSE,	3.8	3.4	4.2	11	3.6	3.2	4.1	7	0.1	-0.5	0.7	18	0.63309	1
Q3TML0_MOUSE,Q3TJL8_MOUSE,	1.3	0.7	1.8	6	1.5	0.8	2.2	9	-0.2	-1.1	0.7	15	0.63332	1
Q3TWH2_MOUSE,Q922E1_MOUSE,Q8C1W8_MOUSE,NNTM_MOUSE,	-1.3	-1.6	-1	25	-1.2	-1.5	-0.9	23	-0.1	-0.5	0.3	48	0.63347	1
RAB18_MOUSE,Q0PD38_MOUSE,	-0.5	-0.9	-0.1	13	-0.4	-0.8	0	12	-0.1	-0.7	0.4	25	0.63369	1
COPG2_MOUSE,	-0.1	-0.6	0.3	15	-0.3	-0.7	0.2	15	0.2	-0.5	0.8	30	0.63374	1
NCLN_MOUSE,	-0.4	-0.8	0	16	-0.5	-0.9	-0.1	13	0.1	-0.4	0.7	29	0.63408	1
PSD7_MOUSE,A1L3B8_MOUSE,	1.2	0.7	1.7	11	1	0.6	1.5	7	0.2	-0.5	0.8	18	0.63471	1
Q4FJP8_MOUSE,Q3TPL8_MOUSE,Q8BLF7_MOUSE,GTR3_MOUSE,	0.2	-0.2	0.5	21	0.3	-0.1	0.6	21	-0.1	-0.6	0.4	42	0.6354	1
PPME1_MOUSE,	1	0.6	1.4	12	1.1	0.7	1.5	11	-0.1	-0.7	0.5	23	0.63599	1
Q543Q4_MOUSE,RAB3D_MOUSE,	-0.2	-0.6	0.1	20	-0.1	-0.5	0.2	16	-0.1	-0.6	0.4	36	0.63603	1
B1ASM1_MOUSE,LPP3_MOUSE,	0	-0.4	0.3	18	-0.2	-0.5	0.2	20	0.1	-0.4	0.6	38	0.63632	1
Q3U232_MOUSE,Q3U1N0_MOUSE,COR1A_MOUSE,	0.9	0.6	1.3	16	1	0.6	1.4	13	-0.1	-0.6	0.4	29	0.63641	1
Q91V35_MOUSE,	-0.1	-0.5	0.4	15	-0.2	-0.6	0.2	19	0.1	-0.4	0.7	34	0.63666	1
TMM11_MOUSE,	-1.1	-1.8	-0.4	5	-1.4	-2.1	-0.5	3	0.2	-0.8	1.3	8	0.63728	1
PLPP_MOUSE,	2.1	1.8	2.4	23	2	1.7	2.4	14	0.1	-0.3	0.5	37	0.63766	1
C9K0Z7_MOUSE,FKBP8_MOUSE,	-0.4	-0.9	0.1	12	-0.5	-1.1	0	7	0.2	-0.6	0.9	19	0.63868	1
MARCS_MOUSE,Q05BL6_MOUSE,	0	-0.6	0.7	4	-0.2	-1.2	0.7	3	0.3	-0.9	1.4	7	0.63895	1
Q8R0M2_MOUSE,Q3U548_MOUSE,UGPA_MOUSE,	1.5	1	2.2	8	2	1	2.8	5	-0.3	-1.5	0.8	13	0.63897	1
Q3TXU8_MOUSE,Q3TH84_MOUSE,PGRC1_MOUSE,Q3TFP8_MOUSE,	0.8	0.3	1.1	10	0.9	0.5	1.2	20	-0.1	-0.6	0.4	30	0.64021	1
RDH14_MOUSE,	-0.9	-1.3	-0.5	12	-0.8	-1.2	-0.4	13	-0.1	-0.7	0.5	25	0.64163	1
EPMIP_MOUSE,	0.7	0.4	1.1	16	0.8	0.5	1.1	18	-0.1	-0.6	0.4	34	0.64294	1
CAP1_MOUSE,Q3UVJ2_MOUSE,Q3U0U5_MOUSE,Q8BPT7_MOUSE,	0.8	0.5	1.1	27	0.7	0.4	1	25	0.1	-0.3	0.5	52	0.64484	1
S6A11_MOUSE,Q8BWA7_MOUSE,	-0.6	-0.8	-0.3	28	-0.6	-0.9	-0.4	25	0.1	-0.3	0.5	53	0.64738	1
NTRK2_MOUSE,	-0.7	-1	-0.3	23	-0.7	-1.1	-0.4	23	0.1	-0.4	0.5	46	0.64774	1
SEPT3_MOUSE,	1.1	0.7	1.4	14	1.2	0.9	1.5	17	-0.1	-0.6	0.4	31	0.64878	1
Q6DFY2_MOUSE,Q3TYL3_MOUSE,	-0.8	-1.1	-0.5	25	-0.7	-1	-0.4	24	-0.1	-0.5	0.3	49	0.64887	1
DDX6_MOUSE,	-0.1	-0.7	0.5	8	0.1	-0.7	0.9	4	-0.2	-1.2	0.8	12	0.64892	1
CYB5B_MOUSE,Q3TH64_MOUSE,	-0.6	-0.9	-0.2	17	-0.5	-0.9	0	11	-0.1	-0.6	0.4	28	0.65021	1
HSDL1_MOUSE,	-0.5	-0.9	-0.1	14	-0.6	-1	-0.2	14	0.1	-0.4	0.6	28	0.6509	1
STX12_MOUSE,A2ADS0_MOUSE,	0.1	-0.2	0.5	16	0.2	0	0.5	28	-0.1	-0.5	0.3	44	0.651	1
GCYB1_MOUSE,	0.2	-0.1	0.6	22	0.3	0	0.7	23	-0.1	-0.6	0.4	45	0.65172	1
CA2D1_MOUSE,	-0.2	-0.5	0	63	-0.3	-0.5	-0.1	52	0.1	-0.2	0.4	115	0.65301	1
NCBP1_MOUSE,	0.8	0	1.8	3	0.6	-0.2	1.4	3	0.3	-0.9	1.5	6	0.65343	1
PHAR1_MOUSE,	-0.1	-0.7	0.5	8	-0.3	-0.8	0.3	8	0.2	-0.6	1	16	0.65484	1
Q6NXI9_MOUSE,KIF5C_MOUSE,Q8CHF1_MOUSE,	1.6	0.8	2.4	5	1.8	1.3	2.3	9	-0.2	-1.1	0.7	14	0.65529	1
A6H6R7_MOUSE,D1LYT3_MOUSE,GBRB2_MOUSE,	-1	-1.5	-0.5	10	-0.8	-1.2	-0.4	15	-0.1	-0.8	0.5	25	0.65544	1
MOSC2_MOUSE,	-1.2	-1.5	-0.9	21	-1.1	-1.4	-0.8	32	-0.1	-0.5	0.3	53	0.65595	1
DLGP1_MOUSE,Q3UHD8_MOUSE,	-1.2	-2.2	-0.6	8	-1.1	-1.8	-0.4	5	-0.2	-1.3	0.8	13	0.65629	1
HACE1_MOUSE,	0.2	-0.5	1	4	0	-0.8	0.8	5	0.2	-0.9	1.3	9	0.6566	1
Q544G1_MOUSE,GBRA2_MOUSE,	-0.4	-1.1	0.2	10	-0.2	-0.9	0.3	8	-0.2	-1	0.7	18	0.65893	1
COPG_MOUSE,	-0.1	-0.6	0.4	13	-0.2	-0.7	0.2	16	0.1	-0.5	0.8	29	0.66006	1
Q8VBV0_MOUSE,B9EJA3_MOUSE,	-0.8	-1.2	-0.5	22	-0.7	-1.1	-0.4	19	-0.1	-0.6	0.4	41	0.6601	1
Q3UMT5_MOUSE,	0.9	0.5	1.3	15	0.8	0.4	1.2	13	0.1	-0.4	0.7	28	0.66018	1
C4IXU2_MOUSE,	0.2	-0.3	0.6	14	0	-0.4	0.5	15	0.1	-0.5	0.8	29	0.66055	1
IMPCT_MOUSE,	0.7	-0.3	1.8	4	1	0.4	1.6	6	-0.3	-1.5	1	10	0.66198	1
RMND1_MOUSE,	-1.4	-1.9	-0.9	12	-1.2	-1.8	-0.6	6	-0.2	-0.9	0.6	18	0.66202	1
SNX27_MOUSE,	1.3	0.5	2.3	4	1.1	0.5	1.9	4	0.2	-0.9	1.4	8	0.66203	1
VAPA_MOUSE,	-0.4	-0.6	-0.2	41	-0.5	-0.7	-0.2	38	0.1	-0.3	0.4	79	0.66207	1
O35619_MOUSE,VAMP2_MOUSE,Q8CHR4_MOUSE,B0QZN5_MOUSE,	0.1	-0.2	0.5	17	0	-0.3	0.4	20	0.1	-0.4	0.5	37	0.66241	1
XPO1_MOUSE,A2AKT7_MOUSE,	0	-0.3	0.3	29	0.1	-0.2	0.3	41	-0.1	-0.5	0.3	70	0.66414	1
B1ASZ0_MOUSE,GLPK_MOUSE,Q3TEN9_MOUSE,	-1.6	-1.8	-1.3	28	-1.5	-1.8	-1.2	30	-0.1	-0.4	0.3	58	0.66424	1
KCC1D_MOUSE,B1AW58_MOUSE,	1.1	0.5	1.7	4	1.3	0.7	2	7	-0.2	-1	0.7	11	0.66519	1
A2AIY8_MOUSE,SGIP1_MOUSE,A7BFW0_MOUSE,A2AIZ0_MOUSE,	0.6	-0.2	1.6	4	0.8	0.2	1.4	7	-0.2	-1.2	0.9	11	0.66577	1
Q5SVP3_MOUSE,PSME2_MOUSE,	1.3	0.6	1.8	9	1.4	0.9	1.9	10	-0.2	-0.9	0.6	19	0.66579	1
CLD11_MOUSE,	-0.8	-1	-0.6	46	-0.9	-1.1	-0.7	53	0.1	-0.2	0.3	99	0.66648	1
ITM2C_MOUSE,	0.5	-0.1	1	8	0.6	-0.1	1.3	5	-0.2	-1	0.7	13	0.6669	1
Q3TQX5_MOUSE,B7ZWF1_MOUSE,B9EKE9_MOUSE,DDX3X_MOUSE,	-0.4	-0.9	0.1	8	-0.2	-0.8	0.4	6	-0.2	-1	0.6	14	0.66738	1
LRC8A_MOUSE,	-0.2	-1.3	0.8	2	-0.5	-1.1	0.2	8	0.3	-1	1.5	10	0.66781	1
Q3TMQ7_MOUSE,ZNT3_MOUSE,Q6NZC3_MOUSE,	0.5	0.1	0.9	16	0.6	0.3	1	15	-0.1	-0.6	0.4	31	0.6691	1
TMM43_MOUSE,	-0.1	-0.7	0.6	5	0.2	-0.7	0.9	4	-0.2	-1.2	0.8	9	0.67014	1
AT2A2_MOUSE,Q5DTI2_MOUSE,	-1	-1.1	-0.8	167	-0.9	-1.1	-0.8	183	-0.1	-0.2	0.2	350	0.67045	1
Q3UGC5_MOUSE,B2L13_MOUSE,Q543S1_MOUSE,Q3TNR7_MOUSE,	-1.1	-1.6	-0.6	7	-0.9	-1.5	-0.4	7	-0.2	-0.9	0.6	14	0.67059	1
Q14BH8_MOUSE,	-0.2	-0.5	0	62	-0.3	-0.5	-0.1	53	0.1	-0.2	0.4	115	0.67066	1
Q5DTI3_MOUSE,SYT2_MOUSE,	-0.5	-0.9	-0.2	35	-0.6	-0.9	-0.3	26	0.1	-0.4	0.5	61	0.6709	1
Q3TXV4_MOUSE,RAB31_MOUSE,	-0.8	-1.2	-0.3	9	-0.6	-1.2	-0.1	8	-0.1	-0.8	0.6	17	0.6709	1
KCC2B_MOUSE,	-1.1	-1.3	-1	139	-1.1	-1.2	-0.9	143	-0.1	-0.3	0.1	282	0.67235	1
RGRF1_MOUSE,B2RS27_MOUSE,	0.5	0	1	15	0.4	0	0.8	19	0.1	-0.5	0.7	34	0.67241	1
Q8CBB6_MOUSE,A0JLV3_MOUSE,B2RTK3_MOUSE,H2B1P_MOUSE,H2B1M_MOUSE,H2B1F_MOUSE,Q8VEE3_MOUSE,H2B1B_MOUSE,B2RVD5_MOUSE,H2B1H_MOUSE,Q921L4_MOUSE,H2B1C_MOUSE,H2B1K_MOUSE,H2B2B_MOUSE,	0.6	-0.3	1.5	3	0.3	-0.6	1.2	2	0.3	-1	1.5	5	0.67302	1
Q80VK3_MOUSE,EXOC5_MOUSE,	0.4	-0.1	0.9	12	0.3	-0.1	0.7	13	0.1	-0.5	0.8	25	0.67348	1
DLG2_MOUSE,	-1.4	-1.6	-1.1	48	-1.4	-1.7	-1.2	36	0.1	-0.3	0.4	84	0.67416	1
UBC12_MOUSE,	0.3	-0.4	1	5	0.1	-0.7	0.8	4	0.2	-0.8	1.2	9	0.67422	1
Q8BG11_MOUSE,Q8VDK4_MOUSE,	0.9	0.4	1.4	7	0.7	0.3	1.2	6	0.1	-0.5	0.8	13	0.67653	1
B2RQQ5_MOUSE,	0.7	0.2	1.3	10	0.9	0.4	1.3	21	-0.1	-0.8	0.5	31	0.67701	1
ECM29_MOUSE,A2ALW0_MOUSE,	0.3	-0.2	0.7	16	0.1	-0.3	0.6	16	0.1	-0.5	0.8	32	0.67765	1
RHOB_MOUSE,Q4FJM5_MOUSE,	-0.4	-0.7	0	25	-0.4	-0.8	-0.1	17	0.1	-0.4	0.6	42	0.67784	1
SIK3_MOUSE,	0.7	-0.2	1.5	3	0.4	-0.4	1.3	4	0.2	-1	1.4	7	0.67789	1
GRM5_MOUSE,B2BH30_MOUSE,	0.6	0	1.2	7	0.4	0	0.9	16	0.1	-0.6	0.8	23	0.67839	1
Q9QX61_MOUSE,Q3UNR4_MOUSE,	-1.3	-2.1	-0.5	4	-1.1	-2	-0.2	2	-0.2	-1.5	1	6	0.67939	1
Q0VGU0_MOUSE,SAR1B_MOUSE,	0.1	-0.4	0.7	5	0	-0.7	0.6	6	0.2	-0.7	1	11	0.68069	1
G6PI_MOUSE,	0.3	-0.4	1	6	0.4	-0.4	1.5	4	-0.2	-1.4	0.9	10	0.68159	1
UBE3C_MOUSE,	0	-0.9	1	4	-0.2	-0.8	0.5	7	0.2	-0.9	1.4	11	0.68205	1
TNPO3_MOUSE,Q6DI95_MOUSE,	0	-0.4	0.5	12	0.1	-0.2	0.5	16	-0.1	-0.7	0.5	28	0.68231	1
O55108_MOUSE,O55107_MOUSE,BASI_MOUSE,	-1.5	-1.8	-1.1	16	-1.4	-1.7	-1	18	-0.1	-0.6	0.4	34	0.68284	1
B1P942_MOUSE,A7LAI9_MOUSE,B0F2B4_MOUSE,	-0.8	-1.3	-0.3	9	-1	-1.9	-0.3	5	0.2	-0.7	1.1	14	0.68328	1
NB5R3_MOUSE,	-0.1	-0.4	0.2	27	0	-0.3	0.2	40	-0.1	-0.4	0.3	67	0.68585	1
Q3UYF3_MOUSE,SPN90_MOUSE,	0.5	0.1	1	12	0.7	-0.1	1.5	8	-0.2	-1.1	0.7	20	0.68619	1
TFR1_MOUSE,Q542D9_MOUSE,	-1.1	-1.5	-0.6	17	-1	-1.4	-0.6	16	-0.1	-0.7	0.4	33	0.68683	1
Q8BGR3_MOUSE,KCC4_MOUSE,	-0.4	-1.1	0.3	6	-0.2	-0.8	0.3	7	-0.2	-1	0.7	13	0.68701	1
ARHG2_MOUSE,	-0.8	-1.3	-0.3	16	-0.6	-1.2	-0.1	13	-0.1	-0.9	0.6	29	0.68744	1
B2RUR3_MOUSE,MDR1_MOUSE,MDR3_MOUSE,	-1.9	-2.8	-1	3	-1.7	-2.3	-1	5	-0.2	-1.4	0.9	8	0.68846	1
CE051_MOUSE,	-0.4	-1.1	0.3	5	-0.2	-1	0.6	5	-0.2	-1.2	0.8	10	0.68851	1
Q3UTP8_MOUSE,Q8BXT5_MOUSE,Q3US35_MOUSE,SATT_MOUSE,	-0.2	-0.6	0.2	15	-0.3	-0.8	0.1	14	0.1	-0.5	0.7	29	0.68855	1
DCE2_MOUSE,Q548L4_MOUSE,	1.9	1.3	2.4	7	1.7	1.1	2.3	5	0.2	-0.6	0.9	12	0.68882	1
Q0P5W2_MOUSE,TMX4_MOUSE,	-0.3	-0.7	0.1	15	-0.2	-0.7	0.3	9	-0.1	-0.7	0.5	24	0.6891	1
EXOC4_MOUSE,Q69ZD1_MOUSE,	-0.1	-0.5	0.2	24	0	-0.4	0.3	21	-0.1	-0.6	0.4	45	0.68995	1
RAB8A_MOUSE,Q0PD50_MOUSE,	-0.1	-0.5	0.2	11	0	-0.5	0.4	7	-0.1	-0.7	0.5	18	0.69088	1
GABR1_MOUSE,	-0.1	-0.6	0.3	11	-0.3	-0.7	0.2	13	0.1	-0.5	0.8	24	0.69103	1
Q5FWJ7_MOUSE,	0.2	-0.5	0.8	5	0	-0.7	0.7	4	0.2	-0.8	1.1	9	0.69172	1
MARE1_MOUSE,Q3U4H0_MOUSE,	1.2	0.1	2.3	3	0.9	0.1	1.8	3	0.3	-1.1	1.8	6	0.69219	1
CP46A_MOUSE,Q3US73_MOUSE,	-0.2	-0.6	0.2	23	-0.3	-0.6	0	22	0.1	-0.4	0.6	45	0.6945	1
CLVS1_MOUSE,	0	-0.6	0.7	6	-0.1	-0.8	0.5	6	0.2	-0.7	1.1	12	0.6949	1
Q69ZY2_MOUSE,ENDD1_MOUSE,	0	-0.5	0.5	9	0.1	-0.6	0.9	4	-0.2	-1.1	0.7	13	0.69525	1
GRM3_MOUSE,	-1.3	-1.6	-1	26	-1.4	-1.7	-1.1	28	0.1	-0.3	0.5	54	0.69746	1
MMS19_MOUSE,	0.1	-0.9	1.1	3	-0.1	-0.8	0.6	4	0.2	-1	1.5	7	0.69925	1
CS052_MOUSE,	-1.3	-1.7	-0.9	13	-1.2	-1.6	-0.8	12	-0.1	-0.6	0.4	25	0.70005	1
K1549_MOUSE,	-0.3	-1	0.4	4	-0.5	-1.4	0.4	3	0.2	-0.9	1.3	7	0.70073	1
CKAP5_MOUSE,	-0.1	-0.4	0.2	36	0	-0.3	0.3	31	-0.1	-0.5	0.4	67	0.70253	1
SCN1B_MOUSE,	-0.5	-0.9	-0.1	11	-0.6	-1.1	-0.1	10	0.1	-0.5	0.8	21	0.70294	1
Q8CF96_MOUSE,	-0.2	-0.6	0.2	20	-0.1	-0.5	0.3	16	-0.1	-0.6	0.5	36	0.70366	1
PRDX2_MOUSE,	2.5	2	3.1	6	2.4	1.9	2.9	7	0.1	-0.6	0.9	13	0.70392	1
Q91XW9_MOUSE,	-0.7	-1.5	0.1	5	-0.5	-1.3	0.3	4	-0.2	-1.3	1	9	0.70416	1
LPCT4_MOUSE,	-1.2	-1.7	-0.7	8	-1.1	-1.7	-0.4	6	-0.2	-1	0.6	14	0.70427	1
Q542R8_MOUSE,GNAZ_MOUSE,	-0.1	-0.4	0.1	37	-0.1	-0.3	0.2	32	-0.1	-0.4	0.3	69	0.70557	1
RGPA1_MOUSE,B7ZNA3_MOUSE,	-0.6	-1.6	0.4	2	-0.4	-1.2	0.4	3	-0.2	-1.5	1	5	0.70595	1
BAP29_MOUSE,Q542A1_MOUSE,	0	-0.6	0.6	7	-0.1	-0.7	0.5	9	0.2	-0.7	1	16	0.70691	1
UN13A_MOUSE,	0.1	-0.3	0.4	20	0	-0.3	0.3	23	0.1	-0.4	0.6	43	0.70704	1
INPP_MOUSE,	0.8	0	1.7	3	0.6	-0.2	1.6	3	0.2	-1	1.4	6	0.7084	1
DLG1_MOUSE,Q3UP61_MOUSE,	-1.1	-1.4	-0.8	26	-1.2	-1.5	-0.8	18	0.1	-0.4	0.5	44	0.70866	1
A2AS90_MOUSE,DJC16_MOUSE,	-0.4	-1.5	0.6	2	-0.2	-1.1	0.7	4	-0.3	-1.6	1.1	6	0.70987	1
A6H5Z3_MOUSE,	0	-0.5	0.5	13	0.1	-0.3	0.6	11	-0.1	-0.8	0.6	24	0.71052	1
TMM33_MOUSE,	-0.6	-1.2	-0.1	6	-0.5	-1	0.1	7	-0.1	-0.9	0.6	13	0.71052	1
B1AV13_MOUSE,APOOL_MOUSE,	-2	-2.4	-1.6	12	-1.9	-2.4	-1.4	11	-0.1	-0.7	0.5	23	0.71069	1
Q80W09_MOUSE,Q3TYJ3_MOUSE,DC1I1_MOUSE,	2.6	2.1	3.5	4	2.6	2	3	7	0.2	-0.6	1.2	11	0.71104	1
STB5L_MOUSE,	-0.6	-1.6	0.3	3	-0.4	-1.2	0.4	4	-0.2	-1.4	1	7	0.71131	1
AMPB_MOUSE,	1.4	1	1.9	11	1.5	1.1	2	10	-0.1	-0.7	0.5	21	0.71242	1
Q60I30_MOUSE,ITPA_MOUSE,	0.5	-0.4	1.3	3	0.2	-0.9	1.4	2	0.3	-1.2	1.6	5	0.71297	1
Q8VC63_MOUSE,PDK2_MOUSE,	0.7	-0.3	1.7	3	0.9	0.3	1.4	6	-0.2	-1.3	1	9	0.7135	1
ARFP2_MOUSE,	0.8	0.3	1.4	7	1	0.5	1.5	7	-0.1	-0.9	0.7	14	0.71369	1
VPS52_MOUSE,	-0.1	-0.6	0.4	13	0	-0.5	0.5	10	-0.1	-0.8	0.6	23	0.71383	1
REEP2_MOUSE,	-0.1	-0.5	0.4	9	-0.2	-0.6	0.3	8	0.1	-0.5	0.8	17	0.71412	1
PYGM_MOUSE,	3.7	3.3	4.2	11	3.5	2.9	4.4	12	0.2	-0.8	1	23	0.71556	1
TMED4_MOUSE,	-0.4	-1	0.2	7	-0.2	-1.1	0.6	4	-0.2	-1.2	0.8	11	0.71566	1
A2ACM7_MOUSE,STX16_MOUSE,	0	-0.6	0.5	14	-0.2	-0.6	0.3	11	0.1	-0.6	0.8	25	0.71609	1
B2KF44_MOUSE,CPNE5_MOUSE,	4.1	3.3	4.7	8	3.9	3.1	4.6	7	0.2	-0.9	1.2	15	0.71633	1
S12A2_MOUSE,	-0.5	-1.5	0.4	5	-0.8	-1.6	0	4	0.2	-1	1.4	9	0.71679	1
SYNC_MOUSE,	1.5	1	2	8	1.6	1.1	2.1	8	-0.1	-0.8	0.6	16	0.7171	1
PX11B_MOUSE,	0	-0.6	0.5	7	0.1	-0.5	0.7	5	-0.1	-0.9	0.6	12	0.71772	1
PHB2_MOUSE,Q3V235_MOUSE,	-1.1	-1.4	-0.9	52	-1.2	-1.5	-0.9	29	0.1	-0.3	0.4	81	0.71813	1
SAHH2_MOUSE,	1.1	0.7	1.4	25	1	0.6	1.3	23	0.1	-0.4	0.5	48	0.71843	1
Q3UVW2_MOUSE,B1AT55_MOUSE,	-0.7	-1.4	-0.1	6	-0.6	-1.1	-0.1	9	-0.1	-1	0.7	15	0.72195	1
TBRG4_MOUSE,	-0.6	-1.3	0	7	-0.5	-1.3	0.4	4	-0.2	-1.2	0.9	11	0.72237	1
Q7TMQ1_MOUSE,Q8CE05_MOUSE,CXA1_MOUSE,Q544I7_MOUSE,	-1	-1.3	-0.8	26	-1	-1.3	-0.7	24	-0.1	-0.5	0.3	50	0.72327	1
CENPV_MOUSE,	3.4	2.8	3.9	7	3.3	2.8	3.8	10	0.1	-0.6	0.8	17	0.72355	1
RMD3_MOUSE,	-0.7	-1.1	-0.3	13	-0.6	-1.1	-0.1	10	-0.1	-0.7	0.5	23	0.72362	1
SUGT1_MOUSE,	-0.1	-0.6	0.5	7	0.1	-0.6	0.7	4	-0.2	-1	0.7	11	0.72531	1
S2540_MOUSE,	-1.6	-2.2	-1	7	-1.4	-2.1	-0.7	5	-0.2	-1	0.7	12	0.72629	1
MARE2_MOUSE,	0.3	-0.1	0.6	22	0.3	0	0.7	21	-0.1	-0.5	0.4	43	0.72714	1
Q05CJ5_MOUSE,Q3TC38_MOUSE,Q3TDJ2_MOUSE,	-0.8	-1	-0.5	54	-0.8	-1.1	-0.6	69	0.1	-0.2	0.4	123	0.72742	1
Q3UBA1_MOUSE,Q3TQE3_MOUSE,B0LAE4_MOUSE,Q3TIC7_MOUSE,Q80ZW9_MOUSE,Q8C1Y9_MOUSE,Q3THR3_MOUSE,AR6P1_MOUSE,	-0.1	-0.9	0.7	2	0.1	-0.5	0.6	5	-0.2	-1.1	0.8	7	0.72982	1
JAM3_MOUSE,	-0.6	-1.1	-0.1	8	-0.7	-1.3	-0.1	7	0.1	-0.6	0.9	15	0.73043	1
SCYL2_MOUSE,	0.1	-0.7	0.8	3	0.3	-0.7	1.3	2	-0.2	-1.5	1.1	5	0.7305	1
KLRAQ_MOUSE,B2RPZ6_MOUSE,	0.7	-0.1	1.6	4	0.9	0	2	2	-0.2	-1.6	1.2	6	0.73068	1
Q14AQ1_MOUSE,PRS10_MOUSE,	0.1	-0.6	0.8	6	-0.1	-0.7	0.5	7	0.2	-0.8	1.1	13	0.73086	1
RS7_MOUSE,Q4FZE6_MOUSE,	0.6	0.2	1	16	0.5	0.1	0.9	12	0.1	-0.5	0.6	28	0.73094	1
Q8VC72_MOUSE,	-1.5	-1.9	-1.2	18	-1.6	-2	-1.2	11	0.1	-0.4	0.6	29	0.73128	1
Q3TLP8_MOUSE,Q8BPG5_MOUSE,Q9D859_MOUSE,RAC1_MOUSE,	-0.2	-0.6	0.1	16	-0.3	-0.7	0.1	11	0.1	-0.4	0.6	27	0.73141	1
VIAAT_MOUSE,Q49S98_MOUSE,	0.1	-0.3	0.4	21	0.2	-0.2	0.5	26	-0.1	-0.5	0.4	47	0.73166	1
TTYH1_MOUSE,	-1.1	-1.5	-0.7	15	-1.2	-1.6	-0.8	14	0.1	-0.5	0.6	29	0.7326	1
GNAS2_MOUSE,GNAS1_MOUSE,	0	-0.3	0.4	17	0.1	-0.3	0.4	15	-0.1	-0.5	0.4	32	0.73494	1
NTRK3_MOUSE,	-0.4	-0.8	0.1	12	-0.5	-1.1	0.1	6	0.1	-0.6	0.9	18	0.73633	1
C1QL3_MOUSE,B0LXL6_MOUSE,	1.1	0.3	2	2	1.3	0.5	2.1	3	-0.2	-1.3	1	5	0.73733	1
Q3UUF0_MOUSE,Q8C541_MOUSE,FAAH1_MOUSE,B1ASG4_MOUSE,	-0.5	-1	-0.1	14	-0.6	-1	-0.2	11	0.1	-0.5	0.7	25	0.73778	1
A2RRK1_MOUSE,	1.1	0.7	1.6	12	1.2	0.8	1.8	9	-0.1	-0.8	0.6	21	0.73819	1
ASTN1_MOUSE,Q3UHD7_MOUSE,	-0.7	-1	-0.3	20	-0.6	-1	-0.2	19	-0.1	-0.6	0.4	39	0.73918	1
KBP_MOUSE,	0.4	-0.3	1	4	0.5	-0.2	1.3	5	-0.2	-1.1	0.8	9	0.73962	1
F1712_MOUSE,	-0.2	-0.7	0.3	9	-0.3	-0.9	0.3	8	0.1	-0.7	0.9	17	0.7402	1
CO024_MOUSE,Q14C26_MOUSE,	-1	-2.1	-0.2	5	-0.9	-1.6	-0.2	4	-0.2	-1.4	0.9	9	0.7402	1
A2AKW0_MOUSE,MCAR1_MOUSE,	-0.7	-1.1	-0.3	19	-0.8	-1.2	-0.4	12	0.1	-0.5	0.6	31	0.74033	1
Q5SUD5_MOUSE,SCO1_MOUSE,	-1.4	-2	-0.8	6	-1.6	-2.5	-0.6	2	0.2	-0.9	1.3	8	0.74033	1
ABCB8_MOUSE,	-1.1	-1.5	-0.6	16	-1	-1.4	-0.6	13	-0.1	-0.7	0.5	29	0.74196	1
IGS21_MOUSE,	-0.3	-0.8	0.2	11	-0.4	-1	0.1	9	0.1	-0.6	0.9	20	0.74197	1
MRS2_MOUSE,	-1.2	-1.7	-0.7	8	-1.1	-1.7	-0.4	6	-0.1	-1	0.7	14	0.74197	1
CSPG5_MOUSE,	-0.4	-0.9	0	13	-0.3	-0.8	0.1	12	-0.1	-0.7	0.5	25	0.74262	1
CA2D2_MOUSE,	0.5	-0.1	1.2	8	0.3	-0.5	1.4	5	0.2	-1.1	1.2	13	0.74509	1
RS8_MOUSE,Q497E9_MOUSE,	0.3	-0.1	0.8	12	0.3	-0.2	0.7	12	0.1	-0.5	0.6	24	0.7453	1
SYT5_MOUSE,	-0.5	-0.8	-0.1	26	-0.5	-0.9	-0.2	24	0.1	-0.4	0.6	50	0.74701	1
A2BI30_MOUSE,	-1.3	-1.8	-0.8	11	-1.4	-1.9	-0.9	9	0.1	-0.6	0.9	20	0.74842	1
Q91VJ9_MOUSE,PLCA_MOUSE,	-0.3	-0.8	0.3	7	-0.2	-0.7	0.3	9	-0.1	-0.8	0.6	16	0.74871	1
VAMP7_MOUSE,	0.3	-0.6	1.1	4	0.5	-0.4	1.3	3	-0.2	-1.4	1	7	0.74937	1
Q3TAD3_MOUSE,PON2_MOUSE,	-0.5	-1.7	0.3	5	-0.4	-1.1	0.3	5	-0.2	-1.5	0.9	10	0.75095	1
EMD_MOUSE,Q3UJP3_MOUSE,	-0.3	-0.8	0.2	9	-0.2	-0.8	0.3	8	-0.1	-0.8	0.6	17	0.75143	1
CAND1_MOUSE,	0.2	0	0.4	82	0.2	0.1	0.4	112	-0.1	-0.3	0.2	194	0.75239	1
ATLA3_MOUSE,	-0.4	-1.4	0.6	3	-0.6	-1.2	0	8	0.2	-1	1.3	11	0.75347	1
Q5DTH1_MOUSE,	0.7	0	1.8	4	1	0.3	1.7	6	-0.2	-1.3	1.6	10	0.75517	1
A3KGC1_MOUSE,B1GX80_MOUSE,A3KGC0_MOUSE,B1GX81_MOUSE,PAK3_MOUSE,	1.7	0.8	2.7	3	1.9	1	2.9	2	-0.2	-1.6	1.1	5	0.75648	1
ST4A1_MOUSE,	0.1	-0.7	0.8	7	0.2	-0.6	1	4	-0.2	-1.2	0.9	11	0.75667	1
SYT3_MOUSE,	0.5	-0.3	1.3	6	0.4	-0.3	1	7	0.2	-0.9	1.2	13	0.75783	1
Q3UL78_MOUSE,	-0.6	-1	-0.2	10	-0.5	-0.9	-0.1	12	-0.1	-0.6	0.5	22	0.75819	1
DPP10_MOUSE,	0	-0.2	0.2	54	-0.1	-0.3	0.2	37	0.1	-0.3	0.4	91	0.75834	1
YKT6_MOUSE,	-0.3	-0.7	0.1	15	-0.2	-0.6	0.2	16	-0.1	-0.6	0.4	31	0.75844	1
KPCG_MOUSE,Q3UN66_MOUSE,	1.3	1.1	1.5	62	1.3	1.1	1.5	62	-0.1	-0.3	0.2	124	0.75874	1
B2KGR9_MOUSE,DGKE_MOUSE,	-0.1	-0.5	0.3	14	-0.2	-0.8	0.4	6	0.1	-0.6	0.8	20	0.75875	1
RTN4_MOUSE,	-0.2	-0.4	0	76	-0.1	-0.4	0.1	76	-0.1	-0.4	0.2	152	0.75989	1
Q3UFK0_MOUSE,EMB_MOUSE,Q3TSZ8_MOUSE,Q3TI59_MOUSE,	0	-0.6	0.6	8	0.2	-0.9	1.4	3	-0.2	-1.5	1.1	11	0.76018	1
HTR5B_MOUSE,	-0.1	-1	0.9	2	-0.3	-1.4	0.8	4	0.2	-1.3	1.6	6	0.76119	1
RBGPR_MOUSE,	0.3	-0.1	0.6	29	0.2	-0.2	0.6	19	0.1	-0.4	0.6	48	0.7613	1
G6PC3_MOUSE,	0	-0.9	0.9	2	0.2	-0.9	1.3	2	-0.2	-1.6	1.2	4	0.76167	1
ASAP1_MOUSE,Q3UJA5_MOUSE,Q505F0_MOUSE,	-1.6	-2.6	-0.5	4	-1.4	-2.1	-0.6	4	-0.2	-1.5	1.1	8	0.76255	1
Q3U561_MOUSE,Q5XJF6_MOUSE,	1.6	1	2.2	5	1.7	1.1	2.4	5	-0.1	-1	0.7	10	0.76259	1
S2546_MOUSE,	-1	-1.3	-0.7	22	-0.9	-1.3	-0.6	18	-0.1	-0.5	0.4	40	0.76294	1
Q68HV1_MOUSE,Q3UH93_MOUSE,	0	-0.7	0.7	7	0.2	-0.7	1.1	3	-0.2	-1.3	1	10	0.76308	1
CA043_MOUSE,Q3UCR6_MOUSE,	-0.3	-1.3	0.8	2	0	-1.1	1	3	-0.2	-1.7	1.3	5	0.7636	1
ELMD2_MOUSE,	-0.5	-1.1	0	5	-0.4	-1.1	0.2	6	-0.1	-1	0.7	11	0.76383	1
CH055_MOUSE,	-2	-2.5	-1.4	7	-1.9	-2.4	-1.3	6	-0.1	-0.8	0.6	13	0.76506	1
TMX2_MOUSE,	-0.5	-0.9	-0.1	13	-0.4	-0.8	-0.1	20	-0.1	-0.6	0.4	33	0.76507	1
ALG2_MOUSE,	0.2	-0.1	0.5	19	0.3	0	0.6	22	-0.1	-0.5	0.4	41	0.76648	1
A3E4A7_MOUSE,Q3TNL9_MOUSE,Q5GA84_MUSMM,Q7JD06_MOUSE,B9V1J9_MOUSE,Q4JFN6_MOUSE,NU1M_MOUSE,	-1.5	-2.1	-0.9	7	-1.3	-2.1	-0.5	3	-0.1	-1.1	0.8	10	0.76834	1
Q8VC68_MOUSE,Q4U256_MOUSE,	1.2	0.6	1.7	10	1.1	0.4	1.8	7	0.1	-0.7	1	17	0.76908	1
Q3MIA8_MOUSE,CSN1_MOUSE,	0.6	0.2	1	14	0.6	0.1	1.1	10	0.1	-0.5	0.7	24	0.76921	1
SNAA_MOUSE,	0.7	0.4	1.1	24	0.7	0.3	1	21	0.1	-0.4	0.5	45	0.76958	1
A2AFG8_MOUSE,A2AFG7_MOUSE,Q6PGJ3_MOUSE,	0	-0.3	0.2	43	0	-0.2	0.3	45	-0.1	-0.4	0.3	88	0.76998	1
Q3UA21_MOUSE,STX6_MOUSE,	-0.4	-1.1	0.2	6	-0.3	-0.9	0.3	6	-0.1	-1	0.7	12	0.77032	1
Q4FJR4_MOUSE,PDK3_MOUSE,	0.8	0.3	1.3	9	0.9	0.3	1.5	5	-0.1	-0.9	0.7	14	0.77041	1
CLVS2_MOUSE,	0.1	-0.6	0.8	6	-0.1	-0.9	0.8	5	0.2	-1	1.2	11	0.77046	1
HCN1_MOUSE,	-0.8	-1.3	-0.3	8	-0.7	-1.4	0.1	8	-0.1	-1	0.7	16	0.77157	1
EFR3B_MOUSE,	-0.3	-0.6	0	26	-0.3	-0.6	0.1	17	-0.1	-0.5	0.4	43	0.77202	1
SE6L2_MOUSE,	-0.1	-0.5	0.4	12	0	-0.4	0.5	11	-0.1	-0.7	0.5	23	0.77216	1
FXL16_MOUSE,B2RPY3_MOUSE,	0.4	-0.2	0.9	7	0.5	0.1	0.9	14	-0.1	-0.8	0.6	21	0.7729	1
GDIA_MOUSE,	1.8	1.3	2.4	7	1.9	1.4	2.4	9	-0.1	-0.8	0.6	16	0.77314	1
Q53WT3_MOUSE,GBRB1_MOUSE,	-0.4	-1.1	0.2	7	-0.6	-1	-0.1	11	0.1	-0.7	0.9	18	0.77341	1
2A5A_MOUSE,Q3ULN8_MOUSE,	-0.5	-1.1	0	7	-0.4	-1.1	0.3	7	-0.1	-1	0.7	14	0.77385	1
FA49A_MOUSE,	-0.1	-0.4	0.2	31	-0.1	-0.4	0.3	23	-0.1	-0.5	0.3	54	0.77386	1
Q3UGT1_MOUSE,CPT1A_MOUSE,Q7TQD5_MOUSE,A8ASF5_MOUSE,	-1.4	-2.5	0.1	3	-1.1	-1.9	-0.4	3	-0.2	-1.6	1.4	6	0.77464	1
GLTP_MOUSE,Q7TMS6_MOUSE,Q3U011_MOUSE,	-0.3	-1.1	0.5	4	-0.4	-1.1	0.3	4	0.1	-0.9	1.2	8	0.77501	1
RAC3_MOUSE,Q14A12_MOUSE,	-0.2	-0.6	0.3	11	-0.2	-0.7	0.2	8	0.1	-0.5	0.7	19	0.7752	1
Q3THJ6_MOUSE,RL10_MOUSE,	-0.2	-0.6	0.2	13	-0.1	-0.6	0.4	10	-0.1	-0.7	0.6	23	0.77565	1
Q2UZW7_MOUSE,MARE3_MOUSE,	0.7	0.3	1.2	10	0.6	0.2	1.1	10	0.1	-0.5	0.7	20	0.77709	1
NDUBA_MOUSE,	-1.5	-1.8	-1.1	16	-1.4	-1.7	-1.1	21	-0.1	-0.5	0.4	37	0.77721	1
Q6P1Y9_MOUSE,	0.5	0.1	1	14	0.5	0	0.9	13	0.1	-0.6	0.8	27	0.77825	1
Q3TRK9_MOUSE,MOT1_MOUSE,Q544N9_MOUSE,Q8C2E6_MOUSE,Q8BPS5_MOUSE,	-0.9	-1.7	0	3	-1	-2	-0.1	2	0.2	-1.1	1.4	5	0.77868	1
Q5J7N1_MOUSE,	0	-0.4	0.3	14	-0.1	-0.5	0.3	11	0.1	-0.4	0.6	25	0.78121	1
NPTX1_MOUSE,A2ACL9_MOUSE,	0.5	0.2	0.9	17	0.6	0.2	1	12	-0.1	-0.6	0.5	29	0.78192	1
B1AWN6_MOUSE,	0.1	-0.3	0.6	10	0.2	-0.1	0.5	22	-0.1	-0.6	0.5	32	0.78284	1
TNPO1_MOUSE,	0.1	-0.5	0.6	8	0	-0.7	0.6	5	0.1	-0.7	0.9	13	0.78421	1
GDE1_MOUSE,	-0.7	-1.2	-0.2	7	-0.8	-1.3	-0.3	10	0.1	-0.6	0.8	17	0.78691	1
NOS1_MOUSE,	2.2	1.6	2.8	10	2	1.5	2.9	9	0.1	-0.9	1	19	0.78722	1
NDUB8_MOUSE,	-1.5	-1.8	-1.1	15	-1.4	-1.8	-1	11	-0.1	-0.5	0.4	26	0.78762	1
PITM1_MOUSE,	0.5	0.1	0.8	21	0.4	0	0.8	16	0.1	-0.4	0.6	37	0.78789	1
TIP_MOUSE,	0.3	-0.4	1	4	0.2	-0.8	1.1	3	0.2	-1	1.3	7	0.78827	1
Q4KMN5_MOUSE,NLGN1_MOUSE,	-0.6	-1	-0.2	13	-0.5	-1	0	7	-0.1	-0.7	0.6	20	0.7883	1
TM55B_MOUSE,	0	-0.7	0.7	3	0.1	-0.7	0.9	3	-0.1	-1.2	0.9	6	0.78832	1
ETBR2_MOUSE,A1L151_MOUSE,	-1.3	-2	-0.6	3	-1.4	-2.2	-0.6	4	0.1	-0.9	1.2	7	0.78903	1
Q3UQM7_MOUSE,Q8R0X8_MOUSE,	-0.3	-0.7	0.2	11	-0.4	-0.8	0.1	8	0.1	-0.5	0.7	19	0.79036	1
NMDE1_MOUSE,	-1.3	-1.9	-0.8	8	-1.4	-2	-0.9	6	0.1	-0.7	0.9	14	0.79048	1
CCD51_MOUSE,	-1.8	-2.3	-1.3	6	-1.7	-2.3	-1	4	-0.1	-0.9	0.7	10	0.79062	1
Q5SVE1_MOUSE,ADA23_MOUSE,	-0.8	-1.3	-0.4	11	-0.9	-1.5	-0.4	9	0.1	-0.6	0.8	20	0.79217	1
MCAT_MOUSE,Q7TPW6_MOUSE,	-1.3	-2	-0.6	4	-1.4	-2	-0.8	4	0.1	-0.8	1	8	0.7922	1
Q99JZ4_MOUSE,Q3TXJ4_MOUSE,	0	-0.4	0.5	8	0.1	-0.4	0.6	11	-0.1	-0.7	0.6	19	0.79363	1
MARH5_MOUSE,A2RTC8_MOUSE,	-1.1	-1.7	-0.6	7	-1.2	-1.8	-0.7	11	0.1	-0.7	0.9	18	0.79432	1
Q5M9M0_MOUSE,RL13A_MOUSE,	-0.1	-0.6	0.5	7	-0.1	-0.7	0.4	7	0.1	-0.6	0.9	14	0.79533	1
B9EI85_MOUSE,H33_MOUSE,A1L0U3_MOUSE,A2A852_MOUSE,A1L0V4_MOUSE,H31_MOUSE,H32_MOUSE,	1	0.1	1.8	3	0.8	-0.1	1.9	2	0.2	-1.2	1.4	5	0.79863	1
Q6P716_MOUSE,Q76LV5_MOUSE,RASH_MOUSE,	-0.1	-0.5	0.4	11	-0.1	-0.6	0.3	9	0.1	-0.5	0.7	20	0.79969	1
PURA_MOUSE,	0	-0.5	0.4	9	0.1	-0.4	0.5	8	-0.1	-0.7	0.5	17	0.80095	1
C9K101_MOUSE,Q14DQ3_MOUSE,	0.1	-0.4	0.6	9	0	-0.7	0.6	8	0.1	-0.7	0.9	17	0.80223	1
Q571F3_MOUSE,Q0VB06_MOUSE,NECP1_MOUSE,	0.2	-0.3	0.7	6	0.3	-0.3	0.8	5	-0.1	-0.8	0.7	11	0.80229	1
AVL9_MOUSE,	0.3	-0.2	0.7	12	0.3	-0.2	0.9	8	-0.1	-0.8	0.6	20	0.80258	1
CNTN1_MOUSE,	-0.2	-0.3	0	111	-0.1	-0.3	0.1	98	-0.1	-0.3	0.2	209	0.80602	1
HNRH2_MOUSE,A2BDV8_MOUSE,Q8C2Q7_MOUSE,Q811L7_MOUSE,HNRH1_MOUSE,	0.5	-0.2	1.2	4	0.4	-0.3	1	5	0.1	-0.8	1	9	0.80671	1
KIFA3_MOUSE,	0.3	-0.5	1.3	4	0.4	-0.3	1.1	8	-0.1	-1.2	1	12	0.80689	1
ILF2_MOUSE,Q3UXI9_MOUSE,	0	-0.5	0.5	8	0.1	-0.5	0.6	9	-0.1	-0.8	0.6	17	0.80702	1
CDIPT_MOUSE,	-0.6	-1	-0.1	9	-0.5	-0.9	-0.1	11	-0.1	-0.7	0.5	20	0.80727	1
TM177_MOUSE,	-1.1	-1.8	-0.3	3	-0.9	-1.9	0.1	2	-0.2	-1.4	1.1	5	0.80839	1
Q8BK95_MOUSE,	0.9	0.3	1.5	7	1	0.1	1.9	2	-0.1	-1.2	0.9	9	0.80914	1
Q4FJN9_MOUSE,Q5M8R9_MOUSE,FPPS_MOUSE,	0.8	0.2	1.3	6	0.7	0.1	1.3	6	0.1	-0.7	0.9	12	0.80928	1
Q3TW28_MOUSE,	3.6	2.5	4.7	5	3.7	2.7	4.8	5	-0.2	-1.7	1.3	10	0.81063	1
CAMLG_MOUSE,	0	-0.6	0.5	10	-0.1	-0.7	0.5	7	0.1	-0.7	0.8	17	0.81074	1
CCNY_MOUSE,	0.2	-0.3	0.7	11	0.1	-0.3	0.6	12	0.1	-0.6	0.7	23	0.81156	1
T126A_MOUSE,	-1.4	-2.1	-0.7	3	-1.3	-2	-0.6	3	-0.1	-1.1	0.9	6	0.81269	1
PI42C_MOUSE,	0.7	-0.2	1.5	2	0.8	0	1.6	2	-0.1	-1.3	1	4	0.81272	1
Q6ZPF0_MOUSE,Q3UB66_MOUSE,RAB1A_MOUSE,Q5SW88_MOUSE,Q0PD67_MOUSE,	-0.5	-0.8	-0.2	30	-0.4	-0.7	-0.2	28	-0.1	-0.4	0.3	58	0.81296	1
SEM4A_MOUSE,	-0.1	-0.7	0.4	6	0	-0.9	0.8	2	-0.1	-1.1	0.9	8	0.81304	1
B1ATZ4_MOUSE,DIC_MOUSE,	-0.8	-1.3	-0.4	9	-0.9	-1.6	-0.3	6	0.1	-0.7	0.9	15	0.81348	1
ADCL1_MOUSE,	-0.5	-0.9	-0.1	25	-0.4	-0.8	-0.1	16	-0.1	-0.6	0.4	41	0.81392	1
NFM_MOUSE,	0.4	-0.4	1.1	7	0.2	-0.3	0.8	6	0.1	-0.8	1	13	0.81424	1
Q9JKY7_MOUSE,Q91W87_MOUSE,	-0.5	-1.4	0.3	4	-0.4	-1.1	0.3	4	-0.1	-1.2	1	8	0.81452	1
PLD3_MOUSE,	-0.1	-0.7	0.5	6	-0.2	-0.9	0.5	3	0.1	-0.8	1	9	0.81694	1
STML2_MOUSE,A2AG40_MOUSE,	-1.1	-1.7	-0.5	6	-1.2	-2.1	-0.3	2	0.1	-1	1.2	8	0.81695	1
ARM10_MOUSE,	-0.3	-0.7	0.1	10	-0.2	-0.7	0.2	9	-0.1	-0.7	0.5	19	0.81779	1
Q14BZ3_MOUSE,LXN_MOUSE,	0.6	0.1	1.1	6	0.7	0.2	1.2	8	-0.1	-0.8	0.6	14	0.81889	1
K1C42_MOUSE,	5.9	5.5	6.4	10	6	5.6	6.4	19	-0.1	-0.7	0.5	29	0.81911	1
NSMA2_MOUSE,	-0.2	-0.7	0.2	10	-0.3	-1	0.3	4	0.1	-0.7	0.9	14	0.81944	1
Q14AG7_MOUSE,SYT12_MOUSE,	-0.9	-1.4	-0.4	7	-1	-1.6	-0.4	8	0.1	-0.7	0.8	15	0.81946	1
FLOT1_MOUSE,Q540I4_MOUSE,	0.5	0.2	0.7	33	0.4	0.1	0.7	34	0.1	-0.3	0.4	67	0.82044	1
Q5BL10_MOUSE,	1.7	0.9	2.4	5	1.6	1.1	2.1	8	0.1	-0.8	1	13	0.82049	1
HERC4_MOUSE,	0	-1.1	1	2	0.1	-0.7	0.9	4	-0.2	-1.5	1.2	6	0.82089	1
Q8BTD8_MOUSE,PITC1_MOUSE,	-1.1	-1.8	-0.3	3	-0.9	-1.8	0	3	-0.1	-1.3	1	6	0.82274	1
NEB2_MOUSE,	1.1	0.2	2.1	2	1	0.2	1.8	2	0.1	-1.1	1.4	4	0.82287	1
Q3UC02_MOUSE,RS11_MOUSE,	-0.1	-0.5	0.4	10	-0.1	-0.6	0.3	9	0.1	-0.5	0.7	19	0.82299	1
CAP2_MOUSE,	0	-0.3	0.4	21	0.1	-0.3	0.5	16	-0.1	-0.6	0.4	37	0.82379	1
B2RSR7_MOUSE,GPD1L_MOUSE,	2.5	2.2	2.9	16	2.6	2.1	3.1	14	-0.1	-0.7	0.5	30	0.82395	1
BRSK1_MOUSE,	-0.1	-0.5	0.3	12	-0.2	-0.9	0.5	5	0.1	-0.7	0.9	17	0.8242	1
Q3TYE5_MOUSE,LSAMP_MOUSE,	0.6	0.3	0.9	33	0.6	0.3	0.8	31	0.1	-0.3	0.4	64	0.82449	1
A2AEV6_MOUSE,PRAF2_MOUSE,	-0.3	-0.9	0.4	6	-0.1	-1.2	1	2	-0.1	-1.4	1.1	8	0.82451	1
ARPC2_MOUSE,	5.4	4.7	6.1	17	5.5	4.9	6.1	10	-0.1	-1.1	0.8	27	0.82534	1
PP2BB_MOUSE,	0.4	0.1	0.7	25	0.3	0	0.7	26	0.1	-0.4	0.5	51	0.82697	1
TB10B_MOUSE,	0.2	-0.3	0.8	6	0.2	-0.5	0.8	6	0.1	-0.7	0.9	12	0.82727	1
CLMN_MOUSE,B9EJ15_MOUSE,	1.2	0.5	1.8	6	1.1	0.3	2	5	0.1	-1	1.1	11	0.82767	1
CADM2_MOUSE,	-1.4	-1.6	-1.1	39	-1.3	-1.6	-1.1	34	-0.1	-0.4	0.3	73	0.82844	1
Q2NLC5_MOUSE,Q8R3X4_MOUSE,TIM44_MOUSE,	-0.5	-1.2	0.2	8	-0.4	-1.4	0.7	3	-0.1	-1.4	1.1	11	0.82855	1
B1B1C8_MOUSE,KPCE_MOUSE,	0.9	0.5	1.3	16	0.8	0.4	1.2	13	0.1	-0.5	0.6	29	0.83019	1
TSN2_MOUSE,Q9D1X8_MOUSE,Q8C0C9_MOUSE,	-0.7	-1.2	-0.2	10	-0.6	-1.1	-0.1	10	-0.1	-0.7	0.6	20	0.83138	1
Q8C6B0_MOUSE,	-0.8	-1.6	0.1	3	-0.6	-1.7	0.5	2	-0.1	-1.5	1.2	5	0.83233	1
EIF3A_MOUSE,	0.5	0.1	0.9	19	0.4	-0.1	0.9	15	0.1	-0.5	0.7	34	0.83282	1
RIN1_MOUSE,	0.3	-0.2	0.9	9	0.4	-0.1	1	9	-0.1	-0.9	0.7	18	0.83289	1
Q91XH6_MOUSE,Q9Z2P7_MOUSE,	-0.1	-0.6	0.4	9	0	-0.5	0.5	8	-0.1	-0.8	0.6	17	0.83335	1
Q545E6_MOUSE,TSN_MOUSE,	0.7	0.3	1.1	16	0.6	0.2	1.1	13	0.1	-0.5	0.6	29	0.83352	1
ARL8B_MOUSE,	-0.1	-0.5	0.2	19	-0.1	-0.5	0.3	12	-0.1	-0.6	0.4	31	0.83488	1
DC1L1_MOUSE,Q3TWG5_MOUSE,	0.3	-0.6	1.6	7	0.4	-0.1	1	10	-0.1	-1.2	1.3	17	0.83632	1
A2AMH5_MOUSE,CTL1_MOUSE,Q14DK0_MOUSE,A2AMH4_MOUSE,	-0.8	-1.5	0	6	-0.7	-1.5	0.1	5	-0.1	-1.2	1	11	0.83706	1
Q3TS84_MOUSE,Q3UIJ1_MOUSE,Q3TPJ5_MOUSE,EXD2_MOUSE,	-1.4	-2.4	-0.4	2	-1.2	-2.2	-0.3	3	-0.1	-1.5	1.2	5	0.83796	1
Q543X6_MOUSE,MP2K4_MOUSE,	-0.1	-0.6	0.3	14	-0.1	-0.5	0.4	14	-0.1	-0.7	0.5	28	0.83859	1
F171B_MOUSE,	-0.1	-1.2	0.9	2	0	-0.9	1	3	-0.1	-1.5	1.2	5	0.83904	1
H2AW_MOUSE,Q8BP16_MOUSE,	-0.2	-0.9	0.5	6	-0.1	-0.7	0.5	7	-0.1	-1	0.8	13	0.83961	1
APMAP_MOUSE,	-0.3	-0.8	0.1	12	-0.3	-0.8	0.2	10	-0.1	-0.7	0.6	22	0.84043	1
A2ACG7_MOUSE,Q3U505_MOUSE,RPN2_MOUSE,Q61833_MOUSE,	-0.6	-0.9	-0.2	30	-0.5	-0.8	-0.2	20	-0.1	-0.5	0.4	50	0.84069	1
EIF3C_MOUSE,	0.5	0	1.1	7	0.6	0.1	1.2	8	-0.1	-0.8	0.7	15	0.84102	1
ESYT2_MOUSE,	0.6	0.1	1.1	9	0.5	-0.1	1.1	8	0.1	-0.7	0.8	17	0.84271	1
A4QPD6_MOUSE,PLAP_MOUSE,	0.2	-0.4	0.8	7	0.1	-0.5	0.8	5	0.1	-0.8	0.9	12	0.84352	1
MDHC_MOUSE,	1	0.7	1.4	12	1.1	0.8	1.4	13	-0.1	-0.5	0.4	25	0.84354	1
MFTC_MOUSE,Q3T9D8_MOUSE,Q8K0B7_MOUSE,Q3UM21_MOUSE,	-0.9	-1.8	0.1	2	-0.7	-1.9	0.4	3	-0.1	-1.6	1.4	5	0.84472	1
KIF2A_MOUSE,	1.8	1.3	2.3	15	1.9	1.4	2.4	11	-0.1	-0.7	0.6	26	0.84536	1
RHG26_MOUSE,B9EJ96_MOUSE,	-0.3	-0.9	0.3	8	-0.4	-1	0.2	7	0.1	-0.7	0.9	15	0.84638	1
B7ZNF6_MOUSE,CTND2_MOUSE,	0.3	-0.2	0.7	14	0.2	-0.3	0.6	14	0.1	-0.5	0.7	28	0.8469	1
S12A5_MOUSE,	-0.9	-1.1	-0.7	85	-0.8	-1	-0.7	95	-0.1	-0.3	0.2	180	0.84769	1
B1AT82_MOUSE,	3.1	2.4	3.8	8	3	2.1	4.1	3	0.1	-1.2	1.3	11	0.84794	1
ATX10_MOUSE,Q3TKP3_MOUSE,	0.7	0.3	1.1	19	0.7	0.3	1.1	15	-0.1	-0.6	0.5	34	0.84805	1
AGO61_MOUSE,	0.4	-0.4	1.3	4	0.6	-0.5	1.5	5	-0.1	-1.4	1.3	9	0.84822	1
TCPG_MOUSE,Q3U4U6_MOUSE,	1.4	0.9	1.9	13	1.3	0.8	1.9	14	0.1	-0.6	0.8	27	0.84957	1
Q3U3X8_MOUSE,OXA1L_MOUSE,Q3TC56_MOUSE,Q3UTE7_MOUSE,	-1.2	-1.9	-0.6	4	-1.2	-1.8	-0.5	4	-0.1	-1	0.8	8	0.8496	1
UBP24_MOUSE,	2	1.2	2.8	2	2.1	1.3	2.9	2	-0.1	-1.2	1	4	0.8496	1
SPCS2_MOUSE,	-0.2	-0.7	0.4	7	-0.2	-0.8	0.4	6	0.1	-0.7	0.9	13	0.85043	1
Q3UPA3_MOUSE,GDIB_MOUSE,Q3UC72_MOUSE,Q3UUX9_MOUSE,	1.6	0.9	2.8	3	1.8	1.2	2.5	4	-0.1	-1.1	1.2	7	0.85105	1
Q80U92_MOUSE,MLC1_MOUSE,Q8BLR0_MOUSE,	-0.7	-1.5	0	3	-0.9	-2	0.2	2	0.1	-1.2	1.4	5	0.85111	1
Q3U8S5_MOUSE,CAN2_MOUSE,Q3U3A8_MOUSE,	0.6	0.1	1.2	8	0.7	0	1.4	4	-0.1	-1	0.8	12	0.85127	1
CCG3_MOUSE,A6H6R5_MOUSE,	-1.8	-2.5	-1.1	3	-1.9	-2.6	-1.2	3	0.1	-0.9	1	6	0.85245	1
IQEC3_MOUSE,Q3UHJ6_MOUSE,	-1.1	-1.6	-0.6	8	-1	-1.5	-0.5	8	-0.1	-0.8	0.6	16	0.85491	1
SHS6L_MOUSE,	-0.4	-1	0.1	7	-0.3	-1.6	0.9	2	-0.1	-1.5	1.2	9	0.85564	1
SCPDH_MOUSE,	0	-0.4	0.3	19	-0.1	-0.5	0.3	10	0.1	-0.5	0.6	29	0.85575	1
ACBG1_MOUSE,	0.3	0	0.7	21	0.3	-0.1	0.7	17	0.1	-0.4	0.6	38	0.85598	1
GABR2_MOUSE,	-0.5	-0.9	-0.1	17	-0.4	-0.9	0	18	-0.1	-0.6	0.5	35	0.85746	1
CA095_MOUSE,	1.1	0.4	1.7	5	1	0.4	1.6	6	0.1	-0.8	1	11	0.85767	1
ADCY9_MOUSE,	-0.7	-1.6	0.2	3	-0.6	-1.4	0.2	5	-0.1	-1.3	1.1	8	0.8578	1
IF2A_MOUSE,	1	0.2	1.8	3	0.9	0.1	1.7	3	0.1	-1	1.2	6	0.85846	1
CA093_MOUSE,	0.5	-0.6	1.6	3	0.6	-0.1	1.2	4	-0.1	-1.3	1.2	7	0.85866	1
STX7_MOUSE,	0.2	-0.2	0.6	12	0.3	-0.1	0.7	14	-0.1	-0.6	0.5	26	0.85933	1
TM111_MOUSE,	-0.6	-1.2	0	7	-0.5	-1.2	0.2	4	-0.1	-1	0.8	11	0.86084	1
DBC1_MOUSE,	-1.1	-1.7	-0.5	8	-1	-1.6	-0.4	5	-0.1	-0.9	0.8	13	0.8609	1
Q4FJP3_MOUSE,Q3UCX0_MOUSE,Q3TMF4_MOUSE,RASN_MOUSE,Q9D091_MOUSE,	-0.1	-0.6	0.4	10	-0.2	-0.7	0.4	9	0.1	-0.6	0.8	19	0.86129	1
B3GA3_MOUSE,Q3UJY2_MOUSE,Q3UN75_MOUSE,	-0.4	-1.4	0.7	2	-0.3	-1	0.5	3	-0.1	-1.4	1.2	5	0.86236	1
ARMC1_MOUSE,	-0.1	-0.8	0.6	5	-0.2	-0.7	0.4	9	0.1	-0.8	0.9	14	0.86274	1
CDC42_MOUSE,	-0.5	-0.9	-0.1	9	-0.4	-0.8	0	11	-0.1	-0.6	0.5	20	0.86306	1
A2A8Y5_MOUSE,OSCP1_MOUSE,A0ZV96_MOUSE,	0.6	-0.2	1.4	3	0.5	0	1.1	5	0.1	-0.9	1.1	8	0.86344	1
TPPC5_MOUSE,	0.4	-0.2	1.1	5	0.5	-0.1	1.1	6	-0.1	-0.9	0.8	11	0.86352	1
ECHB_MOUSE,	1.5	0.5	2.5	5	1.4	0.5	2.3	2	0.1	-1.2	1.5	7	0.86354	1
Q9CYJ6_MOUSE,A2ATT8_MOUSE,S61A2_MOUSE,	-0.1	-1.1	0.9	3	0	-0.9	0.9	2	-0.1	-1.5	1.3	5	0.86414	1
VPS45_MOUSE,	0.8	0.2	1.3	11	0.8	0.4	1.3	11	-0.1	-0.8	0.6	22	0.86744	1
CREL1_MOUSE,A8C1T7_MOUSE,	-0.5	-1.1	0.1	6	-0.4	-1.1	0.2	6	-0.1	-0.9	0.8	12	0.86745	1
FERM2_MOUSE,Q3TLE2_MOUSE,	-0.3	-0.8	0.3	8	-0.2	-0.8	0.4	10	-0.1	-0.9	0.8	18	0.86805	1
SHAN3_MOUSE,	-1.4	-2	-0.9	8	-1.5	-2.7	-0.4	2	0.1	-1.2	1.4	10	0.86836	1
OSBL1_MOUSE,Q3V156_MOUSE,	0.5	-0.1	1.2	6	0.6	0	1.3	6	-0.1	-1	0.9	12	0.86873	1
HPCL4_MOUSE,B2RRY8_MOUSE,	1.5	0.9	2.1	7	1.4	0.9	2	6	0.1	-0.7	0.8	13	0.86959	1
ABHD3_MOUSE,	-0.2	-0.9	0.4	5	-0.1	-0.9	0.6	4	-0.1	-1.1	0.9	9	0.86996	1
AIMP2_MOUSE,	0.7	0.1	1.2	6	0.6	0	1.2	5	0.1	-0.7	0.9	11	0.87059	1
A2A5R2_MOUSE,	-0.7	-1.1	-0.2	15	-0.7	-1.3	-0.2	11	0.1	-0.6	0.7	26	0.87097	1
DCAKD_MOUSE,	-0.6	-1.1	-0.1	10	-0.5	-1.2	0.2	7	-0.1	-0.9	0.7	17	0.87205	1
ENPP6_MOUSE,	-0.6	-1.2	0.1	6	-0.5	-1	0.1	8	-0.1	-0.9	0.8	14	0.87224	1
RB39B_MOUSE,Q0PD14_MOUSE,	-0.1	-0.6	0.4	8	0	-0.5	0.5	9	-0.1	-0.7	0.6	17	0.87352	1
MGLL_MOUSE,Q3UFX6_MOUSE,	-0.3	-1.2	0.6	4	-0.2	-1	0.5	5	-0.1	-1.3	1.1	9	0.87481	1
Q3UH76_MOUSE,B2RXS4_MOUSE,	-0.7	-1.5	0.1	4	-0.6	-1.6	0.5	3	-0.1	-1.4	1.2	7	0.87489	1
EXOC8_MOUSE,	0.2	-0.1	0.6	17	0.2	-0.2	0.6	13	0.1	-0.5	0.6	30	0.87555	1
TPIS_MOUSE,	-0.2	-0.8	0.5	4	-0.3	-0.9	0.4	5	0.1	-0.8	1	9	0.87741	1
R7BP_MOUSE,	-1.2	-1.7	-0.6	7	-1.1	-1.6	-0.6	8	-0.1	-0.8	0.7	15	0.87863	1
F91A1_MOUSE,B6YY24_MOUSE,	0.7	-0.3	1.9	2	0.6	-0.3	1.5	2	0.1	-1.3	1.6	4	0.87903	1
Q9CXU4_MOUSE,TIM23_MOUSE,	-1.3	-2.1	-0.6	4	-1.4	-2.4	-0.5	2	0.1	-1.1	1.3	6	0.88058	1
TPC_MOUSE,Q80XJ6_MOUSE,	-1.9	-2.5	-1.3	4	-2	-2.7	-1.3	3	0.1	-0.8	1	7	0.88162	1
NOE1_MOUSE,Q8R357_MOUSE,	-1.6	-2.3	-0.9	3	-1.6	-2.2	-0.9	4	-0.1	-1	0.9	7	0.88266	1
Q3UH83_MOUSE,	-0.1	-0.9	0.7	3	0	-0.8	0.8	4	-0.1	-1.2	1	7	0.88291	1
TMM9B_MOUSE,Q3UI08_MOUSE,	-0.1	-0.8	0.5	5	-0.1	-0.6	0.5	5	-0.1	-0.9	0.7	10	0.88378	1
TWF1_MOUSE,	0.5	-0.3	1.3	3	0.6	-0.2	1.4	4	-0.1	-1.2	1	7	0.88424	1
B1AZ39_MOUSE,CHMP6_MOUSE,	-0.6	-1.3	0	6	-0.6	-1.2	0.1	6	-0.1	-1	0.8	12	0.88461	1
Q6ZQ54_MOUSE,	-0.2	-0.5	0	58	-0.2	-0.4	0	57	-0.1	-0.3	0.2	115	0.88488	1
Q3UG14_MOUSE,GBB5_MOUSE,Q3V331_MOUSE,	2.1	1.4	3	7	2.1	1.4	2.7	7	0.1	-1	1.3	14	0.88555	1
ATCAY_MOUSE,	-0.1	-0.5	0.3	13	-0.1	-0.5	0.4	17	-0.1	-0.6	0.5	30	0.88592	1
PTH2_MOUSE,Q5SXR0_MOUSE,	-0.7	-1.6	0.1	5	-0.8	-1.5	-0.1	5	0.1	-1	1.2	10	0.88603	1
Q2TJI9_MOUSE,	0	-0.6	0.6	8	-0.1	-0.7	0.7	7	0.1	-0.9	1	15	0.88631	1
Q8JZZ5_MOUSE,	0.1	-0.4	0.6	8	0	-0.4	0.5	10	0.1	-0.6	0.7	18	0.88691	1
COMT_MOUSE,Q91XH4_MOUSE,	-0.6	-1.4	0.2	4	-0.7	-1.7	0.4	2	0.1	-1.2	1.4	6	0.88714	1
PURB_MOUSE,	0	-0.6	0.6	6	-0.1	-0.6	0.5	5	0.1	-0.7	0.8	11	0.88824	1
LITFL_MOUSE,	0.6	-0.2	1.4	2	0.7	-0.2	1.5	2	-0.1	-1.2	1.1	4	0.89102	1
EIF3L_MOUSE,	0.5	0.1	0.9	20	0.5	0.1	1	12	-0.1	-0.6	0.5	32	0.89153	1
PP1A_MOUSE,	2.7	2.3	3	21	2.7	2.3	3.2	25	-0.1	-0.6	0.5	46	0.89197	1
PGES2_MOUSE,A2ASQ2_MOUSE,	0.3	-0.7	1.3	3	0.2	-0.8	1.2	3	0.1	-1.4	1.6	6	0.89215	1
Q3TY61_MOUSE,DLGP3_MOUSE,B1AS06_MOUSE,	-1.4	-2	-0.7	7	-1.5	-2.3	-0.6	3	0.1	-0.9	1.1	10	0.89236	1
TRAP1_MOUSE,Q3UPJ8_MOUSE,Q3TSG8_MOUSE,Q922Z3_MOUSE,Q3TK29_MOUSE,	0.4	-0.1	0.9	9	0.4	0	0.9	12	-0.1	-0.7	0.6	21	0.89467	1
MIMIT_MOUSE,	-1.1	-1.9	-0.2	3	-1	-1.9	-0.1	2	-0.1	-1.3	1.1	5	0.89603	1
Q1MWP9_MOUSE,Q3TWP9_MOUSE,Q91VL7_MOUSE,Q3TM70_MOUSE,EHD4_MOUSE,	0.7	0.2	1.3	11	0.7	0.1	1.3	8	0.1	-0.7	0.9	19	0.89723	1
Q8K2D8_MOUSE,FIBP_MOUSE,	0.9	0	2	3	0.9	0.2	1.6	6	0.1	-1.2	1.4	9	0.89764	1
Q4FJM3_MOUSE,Q3V1E0_MOUSE,EFNB2_MOUSE,	-0.4	-1	0.1	6	-0.4	-1.2	0.5	2	-0.1	-1.1	1	8	0.90198	1
B9EJ86_MOUSE,	-0.5	-1	0	12	-0.5	-1	-0.1	12	0.1	-0.6	0.7	24	0.90223	1
A2AMR5_MOUSE,Q3UVR2_MOUSE,CNTFR_MOUSE,C9K0Z6_MOUSE,	-0.3	-0.9	0.3	6	-0.2	-0.8	0.3	7	-0.1	-0.8	0.7	13	0.90329	1
PRS4_MOUSE,Q542I9_MOUSE,	0	-0.6	0.7	6	0	-1	1	3	0.1	-1.1	1.2	9	0.90608	1
2A5E_MOUSE,	-0.1	-0.4	0.2	22	-0.1	-0.4	0.3	19	-0.1	-0.5	0.4	41	0.90797	1
DPM1_MOUSE,A2BDX2_MOUSE,A2BDX1_MOUSE,	-0.1	-0.9	0.7	5	-0.1	-0.8	0.5	4	0.1	-1	1.1	9	0.90851	1
Q0VGN4_MOUSE,	0	-0.6	0.5	14	-0.1	-0.6	0.4	9	0.1	-0.7	0.8	23	0.90855	1
SMAP1_MOUSE,	0.3	-0.4	1	3	0.3	-0.6	1.3	2	-0.1	-1.2	1.1	5	0.90956	1
Q3TW40_MOUSE,Q3THB3_MOUSE,B8JK32_MOUSE,Q3TL61_MOUSE,HNRPM_MOUSE,B8JK30_MOUSE,Q570Z0_MOUSE,B8JK33_MOUSE,	0.2	-0.4	0.8	6	0.3	-0.5	1	4	-0.1	-1	0.9	10	0.91331	1
Q3UF95_MOUSE,BAT3_MOUSE,	0	-0.4	0.4	13	-0.1	-0.5	0.4	13	0.1	-0.5	0.7	26	0.91465	1
SCAI_MOUSE,	1.1	0.7	1.6	12	1.1	0.7	1.5	13	0.1	-0.5	0.6	25	0.91583	1
GDIR1_MOUSE,	2.5	2.2	2.9	18	2.4	2.1	2.8	16	0.1	-0.4	0.5	34	0.91607	1
SEP11_MOUSE,	2.3	1.8	2.7	23	2.4	2	2.8	26	-0.1	-0.7	0.5	49	0.91662	1
Q8BVQ9_MOUSE,PRS7_MOUSE,	0.9	0.3	1.5	7	0.8	0.2	1.5	5	0.1	-0.8	0.9	12	0.91967	1
Q3UKS0_MOUSE,Q3UC67_MOUSE,ACSL5_MOUSE,	-0.9	-1.5	-0.4	11	-1	-1.6	-0.4	5	0.1	-0.8	0.9	16	0.92037	1
AT1B2_MOUSE,Q3UR55_MOUSE,	-1	-1.2	-0.8	45	-1.1	-1.3	-0.8	42	0.1	-0.3	0.4	87	0.92252	1
RL19_MOUSE,A2A547_MOUSE,Q5I0T8_MOUSE,	-0.3	-0.8	0.1	11	-0.3	-0.9	0.4	5	-0.1	-0.8	0.7	16	0.92299	1
Q3TXJ7_MOUSE,BAX_MOUSE,Q8K3J2_MOUSE,Q544Z6_MOUSE,	-0.4	-1.1	0.3	4	-0.4	-1.3	0.4	4	0.1	-1	1.1	8	0.9243	1
RP3A_MOUSE,Q768S5_MOUSE,	0.5	-0.2	1.1	5	0.4	-0.4	1.2	4	0.1	-1	1	9	0.927	1
Q8BL63_MOUSE,GPI8_MOUSE,	-0.4	-1	0.3	6	-0.3	-1.1	0.5	4	-0.1	-1	0.9	10	0.92722	1
SORT_MOUSE,	-0.4	-0.9	0.2	8	-0.4	-1	0.2	6	0.1	-0.8	0.9	14	0.92788	1
DHRS7_MOUSE,	-1.1	-1.7	-0.6	8	-1.1	-1.7	-0.4	5	-0.1	-0.9	0.8	13	0.92897	1
CADM3_MOUSE,	-0.1	-0.4	0.1	53	-0.1	-0.3	0.2	38	-0.1	-0.4	0.3	91	0.92977	1
PRAF3_MOUSE,	-0.5	-1.2	0.2	6	-0.6	-1.2	0	9	0.1	-0.9	1	15	0.93106	1
NRBP2_MOUSE,	1.2	0.2	2.2	3	1.3	0.2	2.3	3	-0.1	-1.5	1.4	6	0.93135	1
MIRO1_MOUSE,	-1.1	-1.4	-0.8	22	-1.2	-1.5	-0.8	22	0.1	-0.4	0.5	44	0.93176	1
RAB9A_MOUSE,Q0PD48_MOUSE,	0.5	-0.6	1.8	2	0.4	-0.4	1.3	4	0.1	-1.4	1.6	6	0.93187	1
SUCA_MOUSE,	0.4	-0.1	0.9	10	0.5	0	1	12	-0.1	-0.7	0.6	22	0.933	1
SYT17_MOUSE,	2.1	1.4	2.7	4	1.9	1.3	2.9	8	0.1	-1.1	1	12	0.93326	1
ACOT9_MOUSE,	1.5	0.8	2.2	4	1.5	0.7	2.6	3	-0.1	-1.3	1.1	7	0.93328	1
A3KMM1_MOUSE,B1AXV0_MOUSE,	-0.2	-0.7	0.3	9	-0.2	-0.6	0.3	12	-0.1	-0.7	0.6	21	0.93343	1
LPHN1_MOUSE,	-0.2	-0.7	0.4	11	-0.2	-0.9	0.5	7	0.1	-0.8	0.9	18	0.93427	1
MTMR9_MOUSE,	0.5	-0.2	1.2	4	0.4	-0.7	1.6	2	0.1	-1.4	1.4	6	0.93459	1
ATAD1_MOUSE,	-1.2	-1.5	-0.8	15	-1.1	-1.4	-0.8	20	-0.1	-0.5	0.4	35	0.93491	1
A1E2B8_MOUSE,HS71A_MOUSE,Q3TAI8_MOUSE,Q3TU85_MOUSE,HS71B_MOUSE,	-0.1	-0.6	0.3	13	-0.1	-0.5	0.3	14	-0.1	-0.6	0.5	27	0.93554	1
NLF3_MOUSE,	0.9	0.1	2.1	4	1	0.3	1.7	3	-0.1	-1.2	1.4	7	0.93556	1
TMUB1_MOUSE,	0.1	-0.5	0.8	5	0.2	-0.7	1.2	3	-0.1	-1.2	1	8	0.93585	1
Q545Q2_MOUSE,SURF4_MOUSE,	0.7	-0.3	1.6	2	0.6	-0.1	1.7	4	-0.1	-1.4	1.2	6	0.93776	1
Q80XU2_MOUSE,Q2M4I4_MOUSE,	0.7	0.3	1.2	12	0.9	0.1	1.4	13	-0.1	-0.8	0.7	25	0.93876	1
COASY_MOUSE,	0.6	-0.3	1.5	3	0.5	-0.6	1.6	2	0.1	-1.4	1.5	5	0.94245	1
A2AAN1_MOUSE,SRP68_MOUSE,	0	-0.5	0.5	8	0	-0.5	0.5	7	0.1	-0.7	0.8	15	0.94707	1
INP4A_MOUSE,	0.3	-0.1	0.7	20	0.3	-0.1	0.8	17	-0.1	-0.6	0.5	37	0.94715	1
CHCH3_MOUSE,	-1.7	-2	-1.4	25	-1.8	-2.1	-1.4	18	0.1	-0.4	0.5	43	0.94749	1
Q3UCX7_MOUSE,	-0.3	-0.6	0	32	-0.4	-0.7	0	24	0.1	-0.3	0.4	56	0.9482	1
COPA_MOUSE,Q8BTF0_MOUSE,	0.5	0.1	0.8	21	0.5	0.2	0.9	23	-0.1	-0.5	0.5	44	0.94855	1
ISC2A_MOUSE,	0.6	0.1	1.1	9	0.7	0	1.2	8	-0.1	-0.8	0.7	17	0.951	1
ECHM_MOUSE,	0.6	-0.1	1.3	3	0.7	0	1.4	4	-0.1	-1	0.9	7	0.95332	1
S2542_MOUSE,	-1.4	-1.9	-0.9	7	-1.5	-1.9	-1	12	0.1	-0.6	0.7	19	0.95382	1
DJB14_MOUSE,	-0.1	-0.7	0.5	4	0	-0.9	0.9	4	-0.1	-1.1	1	8	0.95569	1
CAC1E_MOUSE,B2RWX7_MOUSE,	-0.3	-1	0.3	7	-0.3	-0.8	0.2	11	-0.1	-0.9	0.7	18	0.95805	1
PCYXL_MOUSE,	-0.2	-0.9	0.5	5	-0.1	-0.8	0.6	4	-0.1	-1	0.9	9	0.95981	1
ADT4_MOUSE,B2RTC8_MOUSE,	-1.4	-1.7	-1.2	58	-1.4	-1.6	-1.2	54	-0.1	-0.3	0.2	112	0.96019	1
STX18_MOUSE,	0.3	-0.5	1	4	0.2	-1	1.4	2	0.1	-1.4	1.4	6	0.96831	1
NDUS7_MOUSE,	-1.5	-1.9	-1.1	9	-1.5	-1.9	-1	8	-0.1	-0.7	0.6	17	0.97381	1
Q3UPA1_MOUSE,GNA11_MOUSE,	0.2	-0.1	0.4	37	0.2	-0.1	0.5	29	-0.1	-0.4	0.3	66	0.97519	1
A2AS45_MOUSE,PKP4_MOUSE,	0.6	0.1	1.2	8	0.6	-0.7	1.8	2	0.1	-1.3	1.4	10	0.97629	1
CSN2_MOUSE,A2AQE3_MOUSE,	1.3	0.3	2.5	3	1.2	0.7	1.8	6	0.1	-1	1.4	9	0.97763	1
CCHL_MOUSE,Q8BP79_MOUSE,Q6P5G5_MOUSE,	-1.4	-2.1	-0.7	4	-1.5	-2.3	-0.6	2	0.1	-1	1.1	6	0.98209	1
1433E_MOUSE,Q5SS40_MOUSE,	1.5	1.2	1.7	31	1.5	1.3	1.8	30	0	-0.4	0.3	61	1	1
DJC11_MOUSE,A2A8C9_MOUSE,	-1.5	-1.8	-1.2	24	-1.5	-1.8	-1.1	19	0	-0.5	0.4	43	1	1
PTPRF_MOUSE,A2A8M1_MOUSE,A2A8M2_MOUSE,	-0.3	-0.9	0.3	8	-0.3	-0.8	0.3	7	0	-0.8	0.8	15	1	1
A2AEG3_MOUSE,	-0.8	-1.1	-0.6	31	-0.9	-1.2	-0.6	27	0	-0.3	0.4	58	1	1
A2AEG6_MOUSE,	-0.8	-1	-0.6	66	-0.8	-1	-0.6	68	0	-0.2	0.3	134	1	1
A2AG27_MOUSE,	0	-0.4	0.4	15	0	-0.4	0.4	14	0	-0.5	0.5	29	1	1
A2ALL9_MOUSE,	-0.8	-0.9	-0.6	123	-0.7	-0.9	-0.6	124	0	-0.3	0.2	247	1	1
A2AS98_MOUSE,A1L0U6_MOUSE,A2AS97_MOUSE,NCKP1_MOUSE,	0.5	0.3	0.7	80	0.6	0.3	0.8	65	0	-0.3	0.2	145	1	1
A2CG14_MOUSE,RALA_MOUSE,	-0.2	-0.6	0.1	22	-0.2	-0.6	0.1	19	0	-0.5	0.4	41	1	1
PRRT1_MOUSE,A2CG20_MOUSE,	0.2	-0.3	0.7	6	0.2	-0.3	0.7	7	0	-0.7	0.7	13	1	1
A2CG35_MOUSE,RAB12_MOUSE,	-0.1	-0.6	0.4	9	-0.1	-0.7	0.4	9	0	-0.7	0.8	18	1	1
ABD12_MOUSE,	-0.7	-1	-0.4	32	-0.7	-1	-0.4	22	0	-0.4	0.4	54	1	1
ABR_MOUSE,	0.9	0.5	1.4	14	0.9	0.3	1.4	8	0	-0.6	0.7	22	1	1
ACTY_MOUSE,	0.4	0	0.7	21	0.3	0	0.7	15	0	-0.5	0.5	36	1	1
ADA10_MOUSE,B8JJJ0_MOUSE,	-0.2	-1	0.6	4	-0.3	-1.5	0.9	2	0	-1.4	1.5	6	1	1
ADA22_MOUSE,A4FUT9_MOUSE,	-0.6	-0.9	-0.4	47	-0.7	-0.9	-0.4	39	0	-0.3	0.3	86	1	1
ADT1_MOUSE,Q8BVI9_MOUSE,	-1.4	-1.6	-1.3	246	-1.4	-1.5	-1.2	202	0	-0.2	0.1	448	1	1
AFAD_MOUSE,	1	0.4	1.6	10	1	0.4	1.6	8	0	-0.9	0.8	18	1	1
AGAP2_MOUSE,	-0.3	-0.6	0	27	-0.3	-0.6	0	29	0	-0.4	0.4	56	1	1
B1AX52_MOUSE,AOFA_MOUSE,Q3TPD9_MOUSE,	-1.1	-1.4	-0.8	22	-1.1	-1.5	-0.8	17	0	-0.5	0.5	39	1	1
AP3B2_MOUSE,	0.2	0	0.4	72	0.2	0	0.4	66	0	-0.3	0.3	138	1	1
ARL8A_MOUSE,	-0.2	-0.6	0.2	15	-0.1	-0.5	0.3	11	0	-0.6	0.5	26	1	1
ASNA_MOUSE,	0.5	-0.1	1.2	7	0.6	-0.1	1.2	6	0	-0.9	0.9	13	1	1
AT1A1_MOUSE,	-1.2	-1.3	-1.1	421	-1.2	-1.3	-1.1	423	0	-0.1	0.1	844	1	1
AT1A3_MOUSE,	-0.6	-0.7	-0.5	629	-0.6	-0.7	-0.4	645	0	-0.2	0.1	1274	1	1
ATP5H_MOUSE,	-1.4	-1.6	-1.1	36	-1.4	-1.6	-1.2	48	0	-0.3	0.3	84	1	1
ATPA_MOUSE,	-0.5	-0.7	-0.2	49	-0.5	-0.7	-0.2	46	0	-0.3	0.3	95	1	1
K1C13_MOUSE,B1AQ76_MOUSE,	5.8	5.4	6.3	17	5.8	5.3	6.3	17	0	-0.6	0.7	34	1	1
B1AQX9_MOUSE,	-0.6	-0.8	-0.4	65	-0.6	-0.8	-0.4	64	0	-0.3	0.3	129	1	1
B2KGQ6_MOUSE,GDPD1_MOUSE,	-0.4	-0.8	0	15	-0.3	-0.7	0.1	15	0	-0.6	0.5	30	1	1
B2RRE2_MOUSE,MY18A_MOUSE,	0.1	-0.2	0.4	31	0	-0.3	0.4	22	0	-0.4	0.5	53	1	1
B2RRN5_MOUSE,Q3TSQ6_MOUSE,Q3ULK1_MOUSE,	-0.3	-0.8	0.2	10	-0.3	-0.8	0.3	7	0	-0.7	0.7	17	1	1
PRR7_MOUSE,B2RSG4_MOUSE,	-0.7	-1.4	0	4	-0.7	-1.4	0.1	3	0	-1	1	7	1	1
B2RSY3_MOUSE,HECAM_MOUSE,	-1	-1.4	-0.5	11	-0.9	-1.4	-0.5	10	0	-0.7	0.6	21	1	1
DOCK4_MOUSE,B2RUG6_MOUSE,	1.1	0.4	2	9	1.1	0.6	1.8	8	0	-1	1	17	1	1
AAK1_MOUSE,B2RUJ0_MOUSE,	0.1	-0.2	0.4	38	0.1	-0.2	0.4	38	0	-0.4	0.3	76	1	1
TIGAR_MOUSE,B2RWB7_MOUSE,	0.5	0	1.1	12	0.5	0	1.1	7	0	-0.8	0.8	19	1	1
A2AUK5_MOUSE,B6ZHC9_MOUSE,	0.6	0.3	0.8	52	0.6	0.3	0.9	38	0	-0.4	0.3	90	1	1
MTMR5_MOUSE,B2RXX4_MOUSE,B7ZWK2_MOUSE,	0.1	-0.2	0.4	42	0.1	-0.2	0.4	32	0	-0.4	0.4	74	1	1
B8JJL8_MOUSE,	0.5	-0.1	1.2	13	0.5	0.1	0.9	15	0	-0.7	0.8	28	1	1
B8JK04_MOUSE,	-0.5	-0.7	-0.3	110	-0.5	-0.7	-0.3	92	0	-0.2	0.2	202	1	1
BACH_MOUSE,	4.2	3	5	10	4.1	3.5	4.8	8	0	-1.4	1.1	18	1	1
BAT5_MOUSE,	-0.6	-1.1	-0.1	14	-0.6	-1.3	0	5	0	-0.7	0.8	19	1	1
BCS1_MOUSE,	-1	-1.4	-0.6	13	-1	-1.5	-0.5	12	0	-0.6	0.6	25	1	1
BR44_MOUSE,	-1.8	-2.3	-1.3	6	-1.8	-2.7	-1.1	6	0	-0.9	1	12	1	1
BRI3B_MOUSE,	-0.3	-0.8	0.3	6	-0.3	-0.8	0.3	6	0	-0.8	0.7	12	1	1
C109A_MOUSE,	-1.4	-1.7	-1.1	21	-1.5	-1.8	-1.1	25	0	-0.4	0.5	46	1	1
C7G3P1_MOUSE,B8QI35_MOUSE,	0.4	0.1	0.7	25	0.4	0	0.7	22	0	-0.4	0.5	47	1	1
CA2D3_MOUSE,	-1.1	-1.6	-0.6	10	-1.1	-1.6	-0.6	9	0	-0.7	0.7	19	1	1
CAB39_MOUSE,Q8VDZ8_MOUSE,	0.3	-0.1	0.7	15	0.3	-0.1	0.6	18	0	-0.5	0.5	33	1	1
CADM4_MOUSE,	-0.9	-1.3	-0.5	14	-0.9	-1.3	-0.5	16	0	-0.5	0.5	30	1	1
Q5SUC3_MOUSE,CALX_MOUSE,	-0.2	-0.5	0	38	-0.3	-0.5	0	34	0	-0.3	0.4	72	1	1
CAMKV_MOUSE,	1	0.7	1.2	39	1	0.8	1.3	41	0	-0.4	0.3	80	1	1
CAN5_MOUSE,Q3U2P3_MOUSE,Q3TPL4_MOUSE,	0.1	-0.3	0.5	13	0.1	-0.4	0.6	12	0	-0.6	0.6	25	1	1
CAPS1_MOUSE,	-0.3	-0.4	-0.1	97	-0.2	-0.4	-0.1	103	0	-0.2	0.2	200	1	1
CC127_MOUSE,	-1.4	-2	-0.8	5	-1.4	-1.9	-0.8	6	0	-0.8	0.7	11	1	1
CEND_MOUSE,	-1.4	-1.6	-1.1	38	-1.4	-1.6	-1.2	40	0	-0.3	0.3	78	1	1
CF174_MOUSE,	0.1	-0.2	0.4	29	0.1	-0.3	0.4	23	0	-0.4	0.5	52	1	1
CLPT1_MOUSE,	-0.4	-1.5	0.7	2	-0.4	-1.4	0.5	2	0	-1.4	1.5	4	1	1
CMTD1_MOUSE,	-0.7	-1.1	-0.3	11	-0.7	-1.3	0	5	0	-0.8	0.7	16	1	1
CNRP1_MOUSE,	1.1	0.4	1.9	7	1.1	0.5	1.7	4	0	-0.9	0.9	11	1	1
CNTP2_MOUSE,	-0.6	-1	-0.2	19	-0.6	-1	-0.2	17	0	-0.5	0.5	36	1	1
Q7JD03_MOUSE,A3R455_MUSMC,Q7JCZ1_MOUSE,COX2_MOUSE,Q5GA81_MUSMM,A3R481_MOUSE,	-1	-1.3	-0.8	30	-1	-1.3	-0.7	26	0	-0.4	0.3	56	1	1
CPT1C_MOUSE,	0.7	0.3	1.1	11	0.7	0.3	1.1	19	0	-0.5	0.6	30	1	1
B7ZNJ3_MOUSE,CSKI1_MOUSE,	1.2	0.2	2.1	2	1.1	0.4	1.8	4	0	-1.1	1.2	6	1	1
CUL1_MOUSE,	0.6	0.1	1	13	0.6	0.2	1	15	0	-0.7	0.6	28	1	1
CUL4A_MOUSE,	0.4	-0.1	0.9	11	0.4	-0.2	1	8	0	-0.7	0.8	19	1	1
Q2M4H5_MOUSE,CUL5_MOUSE,	0.7	0.3	1.1	15	0.7	0.3	1.1	15	0	-0.6	0.5	30	1	1
D0VYV6_MOUSE,	0	-0.3	0.2	61	0	-0.2	0.2	57	0	-0.3	0.3	118	1	1
D1FNM8_MOUSE,	0.3	0.2	0.5	154	0.3	0.2	0.5	151	0	-0.2	0.2	305	1	1
DC1L2_MOUSE,Q3UGJ3_MOUSE,	-0.1	-0.6	0.5	6	-0.1	-0.7	0.5	7	0	-0.7	0.8	13	1	1
Q8CHG1_MOUSE,DCLK1_MOUSE,A3KN70_MOUSE,	0.7	0.4	1	22	0.7	0.4	1	25	0	-0.4	0.4	47	1	1
Q4FJX5_MOUSE,DHCR7_MOUSE,	-0.5	-1.1	0.2	5	-0.5	-1.1	0.2	6	0	-0.9	0.9	11	1	1
DHRS1_MOUSE,	-0.3	-0.7	0.1	13	-0.3	-0.7	0.1	15	0	-0.6	0.5	28	1	1
DLG4_MOUSE,	-1.6	-1.7	-1.4	96	-1.5	-1.7	-1.4	81	0	-0.3	0.2	177	1	1
DNM1L_MOUSE,	0	-0.2	0.2	87	0	-0.2	0.2	79	0	-0.3	0.2	166	1	1
DYN1_MOUSE,	-0.2	-0.3	0	163	-0.2	-0.3	0	115	0	-0.2	0.2	278	1	1
DYN3_MOUSE,	0	-0.2	0.2	83	0	-0.3	0.2	59	0	-0.2	0.3	142	1	1
E41L3_MOUSE,	0	-0.3	0.2	61	0	-0.2	0.2	56	0	-0.4	0.3	117	1	1
Q3UYK6_MOUSE,EAA2_MOUSE,A2APL8_MOUSE,	-1.1	-1.3	-1	342	-1.1	-1.2	-1	323	0	-0.2	0.1	665	1	1
ECHA_MOUSE,	0.2	-0.2	0.6	15	0.2	-0.3	0.8	14	0	-0.7	0.6	29	1	1
EFTU_MOUSE,	0.4	-0.1	0.8	11	0.3	-0.1	0.8	10	0	-0.6	0.6	21	1	1
ELMO2_MOUSE,A2A5A5_MOUSE,	0.7	0.2	1.2	10	0.7	0.1	1.2	9	0	-0.7	0.8	19	1	1
Q4FK22_MOUSE,ERGI1_MOUSE,Q69ZP5_MOUSE,	-0.4	-0.8	0	10	-0.5	-0.9	0	13	0	-0.5	0.6	23	1	1
ERLN1_MOUSE,	0.6	0.3	1	18	0.6	0.3	1	18	0	-0.5	0.5	36	1	1
FA49B_MOUSE,	0	-0.3	0.3	34	0	-0.2	0.3	37	0	-0.3	0.3	71	1	1
FA81A_MOUSE,	-0.7	-1.1	-0.3	16	-0.6	-1.2	-0.1	12	0	-0.7	0.6	28	1	1
FXYD6_MOUSE,	1	0.6	1.3	10	0.9	0.5	1.4	8	0	-0.5	0.6	18	1	1
FXYD7_MOUSE,	-1.3	-2	-0.7	3	-1.4	-2.4	-0.4	2	0	-1.1	1.2	5	1	1
FYN_MOUSE,	0.3	-0.3	0.8	7	0.2	-0.4	0.9	4	0	-0.8	0.9	11	1	1
GABT_MOUSE,	-0.7	-1.1	-0.2	13	-0.7	-1.2	-0.2	9	0	-0.7	0.7	22	1	1
GBRB3_MOUSE,Q8C446_MOUSE,	-0.6	-1.1	0	8	-0.6	-1	-0.1	11	0	-0.7	0.7	19	1	1
GDAP1_MOUSE,Q3UEX4_MOUSE,	-1.1	-1.4	-0.9	40	-1.1	-1.4	-0.9	25	0	-0.4	0.3	65	1	1
GHC2_MOUSE,	-1.5	-1.8	-1.2	23	-1.5	-1.8	-1.2	18	0	-0.5	0.4	41	1	1
Q5F258_MOUSE,GIT1_MOUSE,	0.3	0	0.7	19	0.3	-0.1	0.7	15	0	-0.5	0.5	34	1	1
GP158_MOUSE,B1AWY4_MOUSE,	-0.7	-1.3	0	8	-0.7	-1.1	-0.3	12	0	-0.7	0.8	20	1	1
GPM6A_MOUSE,Q542P2_MOUSE,	-0.6	-0.7	-0.4	102	-0.5	-0.7	-0.4	98	0	-0.3	0.2	200	1	1
GRM7_MOUSE,Q8BKZ1_MOUSE,	0.7	-0.3	1.7	4	0.7	0.1	1.3	9	0	-1.1	1.2	13	1	1
Q53WR6_MOUSE,GSLG1_MOUSE,	-0.4	-0.8	-0.1	21	-0.4	-0.8	0	16	0	-0.5	0.5	37	1	1
Q52KC1_MOUSE,IF4A2_MOUSE,	0.1	-0.2	0.4	24	0.1	-0.3	0.4	19	0	-0.4	0.5	43	1	1
IF4G1_MOUSE,	0	-0.3	0.4	18	0.1	-0.4	0.5	15	0	-0.6	0.5	33	1	1
A0JNY7_MOUSE,IF4G2_MOUSE,	0	-0.7	0.7	5	0	-0.7	0.7	6	0	-1	1	11	1	1
IGSF8_MOUSE,	0.5	0.3	0.8	46	0.6	0.3	0.8	37	0	-0.3	0.3	83	1	1
IMMT_MOUSE,	-1.6	-1.7	-1.4	155	-1.6	-1.7	-1.4	142	0	-0.2	0.2	297	1	1
IPO4_MOUSE,	0	-0.6	0.6	9	0	-1	1.1	6	0	-1.4	1.2	15	1	1
IPO5_MOUSE,	-0.2	-0.5	0	47	-0.2	-0.5	0	38	0	-0.3	0.4	85	1	1
IPO9_MOUSE,	-0.5	-0.9	-0.1	15	-0.5	-1	0	11	0	-0.7	0.6	26	1	1
IQEC1_MOUSE,	-0.9	-1.1	-0.6	40	-0.9	-1.2	-0.6	30	0	-0.4	0.4	70	1	1
ITPR1_MOUSE,	-1.7	-2.1	-1.3	16	-1.8	-2.2	-1.3	15	0	-0.5	0.6	31	1	1
K1045_MOUSE,	0	-0.3	0.4	15	0	-0.4	0.4	14	0	-0.5	0.5	29	1	1
K1468_MOUSE,	-0.1	-0.5	0.2	25	-0.1	-0.5	0.2	27	0	-0.4	0.4	52	1	1
K6PF_MOUSE,	0.8	0.6	1	68	0.8	0.6	1	60	0	-0.2	0.3	128	1	1
KCRB_MOUSE,	-1	-1.5	-0.5	10	-0.9	-1.6	-0.3	6	0	-0.8	0.8	16	1	1
KPCB_MOUSE,	0.2	0	0.5	37	0.3	0	0.5	34	0	-0.4	0.3	71	1	1
KRT35_MOUSE,	6	5.5	6.4	10	6	5.3	6.7	6	0	-0.8	0.8	16	1	1
Q3TCI7_MOUSE,Q3TI99_MOUSE,Q564E2_MOUSE,LDHA_MOUSE,	0.4	-0.1	1	8	0.4	-0.2	1	8	0	-0.7	0.9	16	1	1
LNP_MOUSE,	-0.2	-0.7	0.3	11	-0.2	-0.7	0.3	10	0	-0.7	0.6	21	1	1
LPP1_MOUSE,	0.3	-0.4	1	3	0.3	-0.3	1	4	0	-1	0.9	7	1	1
LPPR4_MOUSE,	0.2	-0.2	0.6	15	0.2	-0.2	0.6	16	0	-0.5	0.6	31	1	1
LRC59_MOUSE,	-0.8	-1.2	-0.4	14	-0.8	-1.1	-0.4	18	0	-0.5	0.5	32	1	1
LRRT1_MOUSE,	-0.7	-1.6	0.1	4	-0.7	-1.5	0.1	4	0	-1.2	1.1	8	1	1
LRRT4_MOUSE,	-1.7	-2.4	-0.9	4	-1.6	-2.6	-0.6	2	0	-1.3	1.3	6	1	1
LYRIC_MOUSE,	-0.6	-1.1	-0.1	13	-0.5	-1	-0.1	12	0	-0.7	0.6	25	1	1
MARK2_MOUSE,Q3T9A3_MOUSE,Q571J8_MOUSE,	0.1	-0.4	0.5	13	0.1	-0.4	0.5	9	0	-0.6	0.6	22	1	1
MARK4_MOUSE,	0.5	-0.4	1.4	2	0.5	-0.2	1.2	3	0	-1.1	1.2	5	1	1
Q3TTX0_MOUSE,MATR3_MOUSE,Q5BL18_MOUSE,Q6ZQ61_MOUSE,Q4FJT0_MOUSE,	0.2	-0.1	0.6	22	0.2	-0.3	0.6	15	0	-0.5	0.6	37	1	1
MIRO2_MOUSE,	-0.8	-1.5	-0.2	6	-0.9	-1.3	-0.4	11	0	-0.7	0.8	17	1	1
MLEC_MOUSE,	-0.3	-0.8	0.1	12	-0.3	-0.8	0.1	11	0	-0.6	0.6	23	1	1
MOBP_MOUSE,	-1	-1.8	-0.3	4	-1	-1.7	-0.4	3	0	-1	0.9	7	1	1
Q3UF03_MOUSE,Q3UKQ5_MOUSE,MPRD_MOUSE,	0	-0.4	0.4	17	0	-0.4	0.4	13	0	-0.6	0.5	30	1	1
MYADM_MOUSE,Q0VE46_MOUSE,	-0.1	-0.9	0.8	3	-0.1	-0.9	0.7	3	0	-1.1	1.2	6	1	1
MYO5A_MOUSE,	-0.5	-0.7	-0.4	110	-0.5	-0.7	-0.3	92	0	-0.2	0.2	202	1	1
NCAM1_MOUSE,	0	-0.2	0.1	146	0	-0.1	0.2	157	0	-0.3	0.1	303	1	1
NCPR_MOUSE,	-0.2	-0.5	0.1	25	-0.2	-0.6	0.1	25	0	-0.4	0.5	50	1	1
NDUA8_MOUSE,	-1.5	-1.9	-1.1	10	-1.5	-1.9	-1.1	11	0	-0.5	0.6	21	1	1
NDUB9_MOUSE,	-1.4	-1.7	-1.1	19	-1.4	-1.8	-1	10	0	-0.5	0.5	29	1	1
NDUS2_MOUSE,	-1.7	-2	-1.4	38	-1.7	-2	-1.5	32	0	-0.3	0.4	70	1	1
NDUS3_MOUSE,	-2	-2.4	-1.7	16	-2	-2.3	-1.6	12	0	-0.5	0.4	28	1	1
NFASC_MOUSE,	-0.2	-0.4	0	65	-0.2	-0.4	0	65	0	-0.3	0.2	130	1	1
NIPS1_MOUSE,Q5SVF7_MOUSE,	-1.1	-1.8	-0.4	3	-1.1	-2.3	0.1	2	0	-1.4	1.4	5	1	1
NLGN2_MOUSE,	-0.3	-0.7	0	26	-0.4	-0.8	0	14	0	-0.5	0.5	40	1	1
NPTN_MOUSE,	-0.7	-1	-0.5	47	-0.8	-1	-0.5	45	0	-0.3	0.3	92	1	1
NRX1A_MOUSE,	-0.5	-0.8	-0.2	25	-0.6	-0.9	-0.2	19	0	-0.4	0.5	44	1	1
NSF_MOUSE,	1.1	0.9	1.2	135	1.1	1	1.3	185	0	-0.3	0.1	320	1	1
OCAD1_MOUSE,	-1.2	-1.4	-0.9	31	-1.1	-1.5	-0.8	27	0	-0.4	0.4	58	1	1
ODP2_MOUSE,	-0.5	-0.8	-0.1	20	-0.5	-0.8	-0.1	20	0	-0.5	0.4	40	1	1
OLA1_MOUSE,	2.6	2.1	3.3	9	2.6	2.1	3.3	9	0	-0.8	0.8	18	1	1
OTUB1_MOUSE,	0.2	-0.2	0.5	17	0.2	-0.1	0.5	19	0	-0.5	0.4	36	1	1
Q80VX2_MOUSE,OX2G_MOUSE,	0.6	0.3	0.9	21	0.5	0.2	0.9	18	0	-0.4	0.5	39	1	1
PACS1_MOUSE,	0.7	0.4	1	30	0.7	0.4	1	26	0	-0.4	0.4	56	1	1
PCBP1_MOUSE,	-0.1	-0.6	0.4	10	-0.1	-0.6	0.4	9	0	-0.6	0.7	19	1	1
PDE1B_MOUSE,	0.8	0.4	1.2	16	0.9	0.4	1.3	14	0	-0.6	0.5	30	1	1
PEX16_MOUSE,	0.2	-0.6	1	3	0.1	-0.6	0.9	3	0	-1	1.1	6	1	1
PGAP1_MOUSE,	0.6	0.1	1.1	9	0.6	0	1.3	6	0	-0.8	0.8	15	1	1
PGM2L_MOUSE,	0.8	0.6	1	43	0.8	0.6	1	49	0	-0.3	0.3	92	1	1
PHB_MOUSE,	-0.8	-1.1	-0.6	36	-0.8	-1.1	-0.5	28	0	-0.4	0.3	64	1	1
Q5F283_MOUSE,PLS3_MOUSE,	0.2	-0.5	0.9	5	0.2	-0.8	1.2	2	0	-1.2	1.1	7	1	1
PLXA1_MOUSE,	-0.1	-0.4	0.3	26	0	-0.5	0.4	19	0	-0.6	0.5	45	1	1
B2RRX2_MOUSE,PP2BA_MOUSE,	0.2	-0.1	0.4	36	0.2	-0.1	0.5	35	0	-0.4	0.4	71	1	1
B2KGP3_MOUSE,PPM1E_MOUSE,	0.7	0.2	1.2	8	0.7	0.3	1.2	10	0	-0.7	0.6	18	1	1
PSD13_MOUSE,B2RT97_MOUSE,	1.2	0.8	1.6	16	1.1	0.8	1.5	20	0	-0.5	0.5	36	1	1
PSMD5_MOUSE,	1.4	0.8	2.2	7	1.4	0.8	2.1	8	0	-0.9	1	15	1	1
PTAD1_MOUSE,	-0.1	-0.7	0.5	5	-0.2	-0.7	0.4	7	0	-0.8	0.8	12	1	1
PYRD_MOUSE,	-1.1	-1.5	-0.6	12	-1	-1.4	-0.6	13	0	-0.6	0.6	25	1	1
Q059Q1_MOUSE,	0.1	-0.1	0.3	62	0.1	-0.1	0.3	60	0	-0.3	0.3	122	1	1
Q05DA2_MOUSE,SEC62_MOUSE,Q9CRY0_MOUSE,	-0.2	-0.8	0.3	7	-0.3	-0.9	0.3	4	0	-0.8	0.8	11	1	1
Q0PD34_MOUSE,RB22A_MOUSE,	-0.2	-0.7	0.3	8	-0.1	-0.7	0.4	8	0	-0.7	0.7	16	1	1
RAB3B_MOUSE,Q0PD62_MOUSE,	0	-0.3	0.4	25	0.1	-0.3	0.4	21	0	-0.5	0.4	46	1	1
RAB1B_MOUSE,Q0PD66_MOUSE,Q3V3C2_MOUSE,	-0.4	-0.7	-0.1	24	-0.4	-0.7	-0.1	22	0	-0.4	0.4	46	1	1
Q14AY1_MOUSE,	-2.1	-2.6	-1.6	8	-2	-2.7	-1.5	8	0	-0.8	0.8	16	1	1
Q32P04_MOUSE,K2C5_MOUSE,	6.1	5.8	6.4	43	6.1	5.8	6.4	39	0	-0.4	0.4	82	1	1
COPB_MOUSE,Q3T9Y4_MOUSE,	-0.1	-0.5	0.2	19	-0.2	-0.5	0.2	25	0	-0.5	0.5	44	1	1
K0513_MOUSE,Q3TA40_MOUSE,	0.6	-0.1	1.4	5	0.6	0	1.2	6	0	-0.9	1	11	1	1
Q3TDP3_MOUSE,PLCE_MOUSE,	-1.5	-2.5	-0.5	2	-1.5	-2.5	-0.6	3	0	-1.3	1.4	5	1	1
S2544_MOUSE,Q3TE12_MOUSE,Q3TMC4_MOUSE,	-1.4	-2	-0.8	5	-1.4	-2.1	-0.8	6	0	-0.9	0.9	11	1	1
Q3TEX7_MOUSE,MFN2_MOUSE,	-0.9	-1.2	-0.6	31	-0.9	-1.2	-0.6	26	0	-0.4	0.4	57	1	1
Q3TEY5_MOUSE,	-1.5	-1.7	-1.4	145	-1.6	-1.7	-1.4	132	0	-0.2	0.2	277	1	1
Q3TI40_MOUSE,A2AT31_MOUSE,Q3TI19_MOUSE,MTX2_MOUSE,Q2M4G1_MOUSE,	-0.6	-1.4	0.2	3	-0.6	-1.5	0.3	3	0	-1.1	1.2	6	1	1
RAB5C_MOUSE,Q3TJ39_MOUSE,	-0.3	-0.5	0	32	-0.3	-0.6	0	26	0	-0.4	0.4	58	1	1
Q3TL79_MOUSE,AHSA1_MOUSE,	0	-0.4	0.4	13	-0.1	-0.5	0.3	11	0	-0.5	0.6	24	1	1
Q3TNH0_MOUSE,	-0.9	-1.4	-0.4	9	-0.9	-1.4	-0.4	7	0	-0.7	0.7	16	1	1
Q3TPU5_MOUSE,CX4NB_MOUSE,	-0.5	-1.3	0.3	2	-0.5	-1.2	0.2	4	0	-1.1	1	6	1	1
Q3TU36_MOUSE,	1.1	0.8	1.4	28	1.1	0.8	1.5	24	0	-0.5	0.4	52	1	1
Q3UCT9_MOUSE,Q3TVJ0_MOUSE,ITM2B_MOUSE,Q9D1Q3_MOUSE,	0.1	-0.5	0.6	7	0.1	-0.5	0.6	8	0	-0.7	0.8	15	1	1
Q3TYC2_MOUSE,NTRI_MOUSE,	-1.3	-1.6	-1.1	35	-1.4	-1.7	-1.1	32	0	-0.3	0.4	67	1	1
Q3TYH2_MOUSE,RAB15_MOUSE,Q0PD40_MOUSE,	0.4	0	0.9	12	0.4	0	0.8	11	0	-0.5	0.6	23	1	1
Q3TZK4_MOUSE,	-1.6	-1.8	-1.4	47	-1.6	-1.8	-1.4	42	0	-0.3	0.3	89	1	1
Q9DBZ6_MOUSE,Q3U645_MOUSE,	-0.1	-0.6	0.4	11	-0.1	-0.7	0.4	10	0	-0.7	0.7	21	1	1
Q3U944_MOUSE,LMAN1_MOUSE,	-0.5	-1.2	0.2	4	-0.5	-1.4	0.4	3	0	-1.1	1.1	7	1	1
AFG32_MOUSE,Q3UDQ7_MOUSE,	-1.1	-1.3	-0.9	51	-1.1	-1.4	-0.9	35	0	-0.3	0.4	86	1	1
Q3UEQ1_MOUSE,	0.3	-0.1	0.6	24	0.3	-0.1	0.7	18	0	-0.6	0.5	42	1	1
PRIO_MOUSE,Q3UG89_MOUSE,Q4FJQ7_MOUSE,Q3TZI7_MOUSE,Q3UF68_MOUSE,	0.3	0	0.6	24	0.3	0	0.6	24	0	-0.4	0.4	48	1	1
AP1M1_MOUSE,Q3UG16_MOUSE,	0.2	-0.3	0.6	12	0.2	-0.3	0.7	8	0	-0.7	0.6	20	1	1
B2RX08_MOUSE,Q3UGX2_MOUSE,Q3UGY4_MOUSE,	0.1	-0.2	0.5	20	0.2	-0.1	0.5	35	0	-0.5	0.4	55	1	1
Q3UH16_MOUSE,Q6P5H4_MOUSE,Q6TA13_MOUSE,	0.7	0.3	1	26	0.6	0.3	1	21	0	-0.5	0.5	47	1	1
PLST_MOUSE,Q3UJG9_MOUSE,B1AX58_MOUSE,Q3UKB1_MOUSE,	2.3	1.7	2.8	8	2.3	1.5	3.1	4	0	-1	1	12	1	1
Q3ULL9_MOUSE,	-0.4	-0.8	0	14	-0.4	-1	0.1	9	0	-0.6	0.7	23	1	1
Q3UN10_MOUSE,Q80UI9_MOUSE,WFS1_MOUSE,Q3TDI2_MOUSE,	2.1	1.7	2.6	12	2	1.6	2.7	15	0	-0.7	0.7	27	1	1
Q3UNQ1_MOUSE,	-1.2	-1.5	-0.9	23	-1.1	-1.4	-0.8	21	0	-0.4	0.4	44	1	1
Q3UQ73_MOUSE,	-1.5	-1.8	-1.2	27	-1.4	-1.7	-1.1	24	0	-0.4	0.4	51	1	1
Q3URD4_MOUSE,GBRA1_MOUSE,Q544F7_MOUSE,	-1.3	-1.7	-0.9	15	-1.3	-1.7	-0.9	14	0	-0.5	0.5	29	1	1
Q1HL33_MOUSE,ADA2A_MOUSE,Q3URE6_MOUSE,	1.2	0.6	1.8	4	1.2	0.7	1.7	6	0	-0.8	0.8	10	1	1
Q91V78_MOUSE,Q3UWG5_MOUSE,	-0.4	-0.7	-0.1	31	-0.4	-0.7	-0.1	32	0	-0.4	0.4	63	1	1
Q3UY58_MOUSE,	0.2	-0.6	1	5	0.2	-0.7	1.1	5	0	-1.4	1.1	10	1	1
Q3TPB6_MOUSE,Q3UYK8_MOUSE,	0.1	-0.2	0.4	31	0.1	-0.2	0.5	25	0	-0.5	0.4	56	1	1
Q6PD28_MOUSE,Q3V3S8_MOUSE,	-0.1	-0.7	0.4	9	-0.2	-0.7	0.4	7	0	-0.7	0.8	16	1	1
TMCO1_MOUSE,Q3V4A0_MOUSE,	-0.7	-1.3	0	4	-0.6	-1.2	0	6	0	-0.9	0.8	10	1	1
Q497P1_MOUSE,STX1A_MOUSE,Q5D0A4_MOUSE,	-0.8	-1	-0.6	61	-0.8	-1	-0.6	81	0	-0.2	0.3	142	1	1
Q4FJL0_MOUSE,RAB10_MOUSE,	-0.4	-0.6	-0.1	27	-0.3	-0.6	0	22	0	-0.4	0.4	49	1	1
Q4FJQ0_MOUSE,RAB7A_MOUSE,	-0.4	-0.7	-0.2	39	-0.4	-0.7	-0.1	27	0	-0.4	0.3	66	1	1
Q4LG64_MOUSE,	-0.7	-0.9	-0.5	81	-0.7	-0.9	-0.5	93	0	-0.2	0.3	174	1	1
RAB4B_MOUSE,Q4V9W8_MOUSE,	-0.2	-0.6	0.2	11	-0.2	-0.7	0.3	7	0	-0.6	0.6	18	1	1
Q4VAA1_MOUSE,RAB5A_MOUSE,	-0.3	-0.6	0	31	-0.3	-0.6	0	23	0	-0.3	0.4	54	1	1
RAP1B_MOUSE,Q52L50_MOUSE,	-0.3	-0.7	0.1	14	-0.3	-0.7	0.1	12	0	-0.6	0.5	26	1	1
Q3TV94_MOUSE,Q52PE3_MOUSE,SSRA_MOUSE,	-0.4	-1.1	0.2	5	-0.4	-1.1	0.3	4	0	-0.9	0.9	9	1	1
Q542T7_MOUSE,RAB3C_MOUSE,	0.4	0.2	0.7	36	0.4	0.1	0.7	31	0	-0.4	0.4	67	1	1
GNAO_MOUSE,Q543S2_MOUSE,	-0.4	-0.6	-0.2	82	-0.4	-0.5	-0.2	109	0	-0.2	0.2	191	1	1
Q545P0_MOUSE,Q3TSQ1_MOUSE,AT1B1_MOUSE,	-0.7	-0.9	-0.5	92	-0.7	-0.8	-0.5	90	0	-0.3	0.2	182	1	1
TCPD_MOUSE,Q3TII0_MOUSE,Q564F4_MOUSE,	1.3	1	1.6	26	1.3	1	1.6	21	0	-0.4	0.4	47	1	1
Q5DTG0_MOUSE,Q8BR88_MOUSE,	1.3	1.1	1.6	50	1.4	1.1	1.6	50	0	-0.4	0.3	100	1	1
Q5EBQ0_MOUSE,	-1.1	-1.3	-0.8	60	-1	-1.2	-0.8	51	0	-0.3	0.2	111	1	1
RL9_MOUSE,Q5EBQ6_MOUSE,	0.3	-0.1	0.7	11	0.3	-0.1	0.7	11	0	-0.6	0.6	22	1	1
Q5ND42_MOUSE,Q3TGI6_MOUSE,Q3UE53_MOUSE,PIPNA_MOUSE,	-0.3	-0.6	0	25	-0.3	-0.6	0.1	21	0	-0.5	0.4	46	1	1
Q3UAS2_MOUSE,Q5RKN9_MOUSE,	2.9	2.2	3.5	7	2.8	2	3.6	5	0	-1	1	12	1	1
Q499X4_MOUSE,Q3TXD3_MOUSE,VAT1_MOUSE,Q5RKP0_MOUSE,	1.9	1.5	2.4	12	1.9	1.6	2.3	18	0	-0.5	0.6	30	1	1
MTP18_MOUSE,Q3TI65_MOUSE,Q5SQ26_MOUSE,	-0.5	-1.2	0.3	4	-0.5	-1	0	8	0	-0.8	0.9	12	1	1
Q5SX53_MOUSE,M2OM_MOUSE,	-1.2	-1.4	-0.9	61	-1.1	-1.3	-0.9	56	0	-0.3	0.2	117	1	1
Q8K596_MOUSE,Q68EG0_MOUSE,	-0.4	-0.6	-0.2	57	-0.4	-0.6	-0.2	65	0	-0.3	0.3	122	1	1
Q68FG2_MOUSE,	-0.2	-0.3	-0.1	230	-0.2	-0.4	-0.1	170	0	-0.2	0.2	400	1	1
Q68FL0_MOUSE,	-0.2	-0.5	0.1	23	-0.2	-0.5	0.2	20	0	-0.5	0.4	43	1	1
A2AGI2_MOUSE,A2AGI1_MOUSE,B2RWZ9_MOUSE,Q69ZI4_MOUSE,	-0.5	-0.8	-0.1	24	-0.5	-0.9	-0.1	17	0	-0.4	0.5	41	1	1
RAB21_MOUSE,Q6A0C7_MOUSE,Q0PD35_MOUSE,	-0.2	-0.6	0.2	16	-0.2	-0.6	0.2	15	0	-0.6	0.5	31	1	1
Q6A0D1_MOUSE,TTC35_MOUSE,	-0.8	-1.3	-0.3	7	-0.8	-1.3	-0.2	8	0	-0.8	0.7	15	1	1
Q6DIC7_MOUSE,	0	-0.2	0.2	64	0	-0.3	0.2	49	0	-0.3	0.3	113	1	1
Q6GTD3_MOUSE,	-1.3	-1.5	-1.1	51	-1.3	-1.5	-1.1	52	0	-0.3	0.2	103	1	1
Q6NXI4_MOUSE,	0	-0.5	0.4	15	-0.1	-0.6	0.4	13	0	-0.6	0.7	28	1	1
Q5EBG5_MOUSE,Q6P1A9_MOUSE,Q58ET1_MOUSE,Q80UT7_MOUSE,RL7A_MOUSE,	2	1.7	2.4	18	2.1	1.7	2.4	11	0	-0.5	0.5	29	1	1
Q6P6I8_MOUSE,	-0.5	-0.8	-0.3	47	-0.5	-0.8	-0.3	46	0	-0.3	0.3	93	1	1
Q6PDH1_MOUSE,	2.8	2.4	3.2	17	2.8	2.4	3.3	19	0	-0.6	0.6	36	1	1
Q6PF96_MOUSE,ETFD_MOUSE,	-0.9	-1.4	-0.4	15	-0.8	-1.2	-0.4	16	0	-0.7	0.6	31	1	1
Q6ZQ49_MOUSE,Q3UHK5_MOUSE,AT1A2_MOUSE,	-1.1	-1.2	-0.9	465	-1.1	-1.2	-0.9	452	0	-0.2	0.2	917	1	1
Q6ZQ74_MOUSE,DAAM1_MOUSE,Q6DFY0_MOUSE,	-0.3	-1	0.4	7	-0.3	-1	0.4	5	0	-1	1	12	1	1
Q7JCX7_MOUSE,Q5GA78_MUSMM,B9V188_MOUSE,Q9MQW4_MOUSE,A3R458_MUSMC,COX3_MOUSE,A3E4B3_MOUSE,Q7JCA9_MOUSE,A3R3W7_MOUSE,	-1	-1.5	-0.4	5	-1	-1.7	-0.3	3	0	-0.8	0.9	8	1	1
Q7JD05_MOUSE,Q6QN84_MOUSE,NU2M_MOUSE,Q9MD59_MOUSE,	-1.4	-2.2	-0.5	3	-1.4	-2.3	-0.4	2	0	-1.3	1.2	5	1	1
Q7TQH3_MOUSE,	0	-0.2	0.3	47	0	-0.2	0.3	52	0	-0.3	0.3	99	1	1
Q8BNI6_MOUSE,Q80TT4_MOUSE,Q3TSX8_MOUSE,	-0.9	-1.1	-0.8	78	-0.9	-1.1	-0.7	59	0	-0.3	0.2	137	1	1
Q80U83_MOUSE,	0.4	-0.1	0.8	13	0.4	-0.1	0.9	10	0	-0.7	0.6	23	1	1
B2RWI2_MOUSE,Q80UJ8_MOUSE,LACTB_MOUSE,	-0.6	-1.8	0.5	2	-0.6	-1.6	0.3	4	0	-1.4	1.5	6	1	1
VAPB_MOUSE,Q8BH80_MOUSE,	-0.4	-0.7	-0.1	18	-0.4	-0.7	0	17	0	-0.5	0.4	35	1	1
PDE1A_MOUSE,Q8BRR9_MOUSE,	0.6	0.3	0.9	25	0.6	0.3	0.9	22	0	-0.4	0.4	47	1	1
Q8BS26_MOUSE,Q6GSA6_MOUSE,AKT1_MOUSE,	0.4	-0.6	1.3	3	0.3	-0.8	1.5	2	0	-1.5	1.5	5	1	1
Q8BSI9_MOUSE,CADH2_MOUSE,Q3UIC2_MOUSE,Q6GU11_MOUSE,	-0.4	-0.9	0.1	10	-0.4	-0.8	0	13	0	-0.6	0.7	23	1	1
Q8BMU5_MOUSE,Q8BTV1_MOUSE,	-0.7	-1.2	-0.1	6	-0.7	-1.3	-0.1	5	0	-0.8	0.8	11	1	1
Q8C1E4_MOUSE,SC23A_MOUSE,	1.3	0.9	1.7	15	1.3	0.9	1.8	14	0	-0.6	0.5	29	1	1
Q8C7W8_MOUSE,EAA1_MOUSE,Q543U3_MOUSE,Q8C3T7_MOUSE,	-0.5	-0.7	-0.3	90	-0.5	-0.7	-0.3	91	0	-0.3	0.2	181	1	1
Q8K1M3_MOUSE,	-0.3	-0.7	0.2	13	-0.2	-0.6	0.2	15	0	-0.6	0.5	28	1	1
Q8R384_MOUSE,Q69ZX3_MOUSE,	0.2	-0.2	0.5	19	0.2	-0.2	0.6	15	0	-0.5	0.4	34	1	1
Q91V55_MOUSE,	2	1.7	2.4	13	2.1	1.6	2.5	7	0	-0.6	0.5	20	1	1
Q91VA7_MOUSE,	-0.2	-0.5	0.1	35	-0.2	-0.4	0.1	30	0	-0.4	0.3	65	1	1
Q91YS9_MOUSE,EPHB3_MOUSE,	-1.4	-2.1	-0.5	6	-1.3	-1.9	-0.7	5	0	-1	1	11	1	1
Q5SX22_MOUSE,Q6NZC5_MOUSE,Q3TH47_MOUSE,Q8VC46_MOUSE,Q78XY9_MOUSE,Q922B0_MOUSE,UBIQ_MOUSE,Q642L7_MOUSE,A5JUZ1_MOUSE,Q8R0Z9_MOUSE,Q8C2K3_MOUSE,Q66JP1_MOUSE,Q922Z8_MOUSE,	-0.1	-0.4	0.2	36	-0.1	-0.4	0.2	38	0	-0.3	0.4	74	1	1
B7U582_MOUSE,Q99KD7_MOUSE,	0	-0.3	0.3	31	0	-0.3	0.3	34	0	-0.4	0.4	65	1	1
Q99PH4_MOUSE,	-0.4	-0.9	0.2	9	-0.4	-1	0.3	6	0	-0.8	0.9	15	1	1
Q9CQM8_MOUSE,	-0.2	-0.8	0.4	5	-0.2	-0.8	0.4	5	0	-0.9	0.8	10	1	1
Q9D4I9_MOUSE,	0	-0.4	0.5	11	0	-0.8	0.8	5	0	-0.9	0.9	16	1	1
Q9D6D0_MOUSE,	-1.2	-1.5	-0.8	25	-1.2	-1.6	-0.9	18	0	-0.4	0.5	43	1	1
Q9Z1R9_MOUSE,	6	5.6	6.5	10	6	5.6	6.4	13	0	-0.5	0.6	23	1	1
QCR2_MOUSE,	-1.3	-1.5	-1.1	67	-1.4	-1.6	-1.2	90	0	-0.2	0.3	157	1	1
RAB2A_MOUSE,Q0PD65_MOUSE,	-0.2	-0.4	0	36	-0.2	-0.5	0.1	29	0	-0.3	0.3	65	1	1
RAB35_MOUSE,Q3U0T9_MOUSE,	0	-0.4	0.4	12	0	-0.4	0.3	17	0	-0.5	0.5	29	1	1
Q0PD49_MOUSE,RAB8B_MOUSE,	0.3	-0.1	0.7	14	0.3	0	0.7	12	0	-0.5	0.5	26	1	1
RALB_MOUSE,Q8CCG5_MOUSE,	-0.2	-0.6	0.3	13	-0.2	-0.6	0.3	11	0	-0.6	0.6	24	1	1
RAN_MOUSE,Q3ULW0_MOUSE,	1.7	1.3	2.2	13	1.8	1.3	2.2	9	0	-0.6	0.6	22	1	1
RAP2A_MOUSE,	0	-0.4	0.5	12	0	-0.4	0.5	12	0	-0.6	0.6	24	1	1
Q3UDZ1_MOUSE,RHOG_MOUSE,	-0.8	-1.3	-0.2	6	-0.7	-1.3	-0.1	5	0	-0.9	0.8	11	1	1
RL18A_MOUSE,	-0.3	-0.7	0.1	17	-0.3	-0.7	0.2	11	0	-0.6	0.6	28	1	1
RL7_MOUSE,Q5M9N8_MOUSE,Q3UBI6_MOUSE,	0.6	0.3	0.9	26	0.7	0.3	1	18	0	-0.5	0.4	44	1	1
A5XDA7_MOUSE,ROCK2_MOUSE,	0.9	0.6	1.3	26	0.9	0.5	1.2	21	0	-0.4	0.5	47	1	1
RTN1_MOUSE,Q4FJL2_MOUSE,	0.6	0.4	0.8	63	0.6	0.4	0.8	49	0	-0.3	0.3	112	1	1
RTN3_MOUSE,	-0.2	-0.4	0	70	-0.2	-0.4	0	67	0	-0.3	0.3	137	1	1
Q544D7_MOUSE,S27A1_MOUSE,Q3TP13_MOUSE,	-0.5	-1.2	0.2	7	-0.5	-1.1	0.1	7	0	-1	0.9	14	1	1
S39A7_MOUSE,Q14C53_MOUSE,	-0.2	-1	0.6	3	-0.2	-1.1	0.6	3	0	-1.1	1.1	6	1	1
SAC1_MOUSE,	-0.4	-0.8	-0.1	25	-0.4	-0.7	-0.1	26	0	-0.4	0.4	51	1	1
Q6PCX2_MOUSE,SC6A1_MOUSE,	-0.4	-0.6	-0.1	39	-0.4	-0.6	-0.1	41	0	-0.3	0.3	80	1	1
SCAM5_MOUSE,	0.3	-0.2	0.8	10	0.3	-0.2	0.8	9	0	-0.7	0.6	19	1	1
SE1L1_MOUSE,Q5DTL8_MOUSE,	-0.1	-0.6	0.4	13	-0.1	-0.7	0.4	6	0	-0.7	0.7	19	1	1
SEPT6_MOUSE,	1.6	1.2	2	22	1.6	1.2	2	27	0	-0.6	0.5	49	1	1
SFXN5_MOUSE,	-2	-2.2	-1.7	28	-2	-2.2	-1.8	41	0	-0.3	0.3	69	1	1
SHSA4_MOUSE,	-0.1	-1	0.9	2	-0.1	-0.9	0.7	3	0	-1.2	1.3	5	1	1
SND1_MOUSE,Q3TW51_MOUSE,	0.9	0.4	1.4	13	1	0.5	1.4	15	0	-0.7	0.6	28	1	1
SNP25_MOUSE,	-0.9	-1.1	-0.7	53	-0.9	-1.2	-0.7	43	0	-0.3	0.3	96	1	1
SNP47_MOUSE,	0.2	-0.1	0.6	25	0.2	-0.1	0.6	18	0	-0.5	0.5	43	1	1
SNPH_MOUSE,	-1.3	-1.7	-0.9	17	-1.3	-1.7	-1	19	0	-0.5	0.5	36	1	1
SPTB2_MOUSE,	0.2	0	0.3	308	0.2	0.1	0.4	324	0	-0.2	0.1	632	1	1
STK39_MOUSE,A2AQL0_MOUSE,	-0.1	-1.2	1	2	0	-1	1	3	0	-1.5	1.4	5	1	1
STX4_MOUSE,	-0.9	-1.5	-0.3	7	-0.9	-1.7	-0.1	4	0	-1	1	11	1	1
Q5F234_MOUSE,STX8_MOUSE,	-0.5	-1.4	0.4	4	-0.5	-1.1	0.1	5	0	-1	1.1	9	1	1
STXB1_MOUSE,	0.5	0.3	0.6	211	0.5	0.3	0.6	270	0	-0.2	0.2	481	1	1
SV2A_MOUSE,	-0.1	-0.2	0.1	104	0	-0.2	0.1	105	0	-0.3	0.2	209	1	1
SYIM_MOUSE,	2.1	1.7	2.4	24	2.1	1.8	2.3	24	0	-0.4	0.5	48	1	1
SYN2_MOUSE,	3.1	2.9	3.3	100	3.2	3	3.4	93	0	-0.3	0.2	193	1	1
SYPL1_MOUSE,Q3TVX7_MOUSE,Q3U4T9_MOUSE,	-0.6	-1.4	0.2	2	-0.6	-1.2	0	6	0	-1	1	8	1	1
SYT1_MOUSE,Q3TPT3_MOUSE,	-0.6	-0.7	-0.4	163	-0.6	-0.7	-0.4	150	0	-0.2	0.2	313	1	1
TBB2A_MOUSE,	0.9	0.8	1	255	0.9	0.7	1	300	0	-0.1	0.2	555	1	1
B2RSN3_MOUSE,TBB2B_MOUSE,	0.9	0.7	1	247	0.9	0.7	1	291	0	-0.2	0.2	538	1	1
TBB2C_MOUSE,	0.7	0.6	0.8	250	0.7	0.5	0.8	291	0	-0.1	0.2	541	1	1
TBB3_MOUSE,	0.7	0.6	0.9	173	0.7	0.6	0.8	197	0	-0.1	0.2	370	1	1
TBB4_MOUSE,	0.5	0.4	0.7	216	0.5	0.4	0.6	251	0	-0.1	0.2	467	1	1
TBB5_MOUSE,	0.7	0.6	0.8	260	0.7	0.5	0.8	302	0	-0.1	0.2	562	1	1
TBC24_MOUSE,	-0.3	-0.7	0.1	14	-0.2	-0.6	0.2	14	0	-0.6	0.5	28	1	1
TERA_MOUSE,	1.9	1.3	2.4	13	1.9	1.4	2.3	18	0	-0.7	0.7	31	1	1
THEM4_MOUSE,	1.3	0.8	1.8	7	1.3	0.8	1.8	5	0	-0.7	0.7	12	1	1
Q53YX2_MOUSE,THY1_MOUSE,	-0.6	-0.8	-0.4	36	-0.6	-0.8	-0.3	32	0	-0.4	0.3	68	1	1
Q545H3_MOUSE,Q3UBR8_MOUSE,TI17B_MOUSE,	-1.4	-2	-0.7	4	-1.3	-1.9	-0.7	5	0	-0.9	0.8	9	1	1
TIM22_MOUSE,	-1.3	-1.9	-0.7	4	-1.3	-2	-0.6	3	0	-0.9	0.9	7	1	1
TM143_MOUSE,	-1.3	-2.2	-0.5	3	-1.3	-2.3	-0.4	3	0	-1.2	1.3	6	1	1
TM40L_MOUSE,	-1.3	-1.6	-0.9	15	-1.2	-1.6	-0.8	12	0	-0.6	0.5	27	1	1
A2RS53_MOUSE,Q8C1Z9_MOUSE,TMED2_MOUSE,	-0.3	-0.9	0.2	6	-0.4	-1.1	0.4	4	0	-0.9	0.9	10	1	1
TMEDA_MOUSE,	-0.4	-0.7	0	18	-0.4	-0.7	0	14	0	-0.5	0.5	32	1	1
TNPO2_MOUSE,	0	-0.3	0.4	20	0	-0.4	0.4	11	0	-0.5	0.6	31	1	1
TOM22_MOUSE,	-1.4	-1.8	-1	12	-1.4	-1.8	-0.9	9	0	-0.6	0.6	21	1	1
TOM40_MOUSE,	-1.3	-1.7	-1	21	-1.3	-1.6	-1	17	0	-0.5	0.4	38	1	1
TSN7_MOUSE,B1AUD0_MOUSE,Q6PDN6_MOUSE,	-0.6	-1	-0.2	19	-0.6	-1	-0.3	18	0	-0.5	0.5	37	1	1
TTYH3_MOUSE,	-0.7	-1.3	-0.1	6	-0.7	-1.3	-0.1	5	0	-0.8	0.8	11	1	1
UBE2O_MOUSE,A2A7X3_MOUSE,	0.4	0.1	0.8	17	0.4	0.1	0.7	18	0	-0.4	0.5	35	1	1
UCRI_MOUSE,	-1.4	-1.7	-1.2	37	-1.4	-1.7	-1.2	28	0	-0.3	0.4	65	1	1
VA0D1_MOUSE,	-0.2	-0.4	0.1	58	-0.2	-0.4	0.1	40	0	-0.3	0.3	98	1	1
VATC1_MOUSE,	0.5	0.3	0.7	59	0.5	0.2	0.7	37	0	-0.3	0.3	96	1	1
VATE1_MOUSE,	1.2	0.9	1.5	17	1.2	0.8	1.5	20	0	-0.4	0.5	37	1	1
VDAC1_MOUSE,	-1.3	-1.5	-1.1	93	-1.3	-1.5	-1.1	107	0	-0.2	0.2	200	1	1
VGLU1_MOUSE,	0.1	-0.2	0.3	53	0	-0.2	0.3	61	0	-0.3	0.3	114	1	1
A2A5S1_MOUSE,XPO2_MOUSE,	-0.3	-0.6	0	44	-0.3	-0.6	0	31	0	-0.4	0.4	75	1	1

## Sheet: CeA-cytosolic farct.
Group	14N shocked/15N reference				14N control/15N reference				14N shocked/14N control
Uniprot ID	log2ratio	lowerCI	upperCI	# of quantified peptides	log2ratio	lowerCI	upperCI	# of quantified peptides	log2ratio	lowerCI	upperCI	# of quantified peptides identified	p-value	adjusted p-value
TBA1C_MOUSE,Q52L87_MOUSE,	-1.2	-1.4	-1.1	99	-2	-2.2	-1.8	118	0.8	0.5	1	217	7.1562e-19	5.5e-16
ENOG_MOUSE,Q545V3_MOUSE,	-0.6	-0.8	-0.5	97	-1.4	-1.5	-1.2	109	0.7	0.5	1	206	1.0214e-17	3.92e-15
TBA4A_MOUSE,	-1.3	-1.5	-1.2	77	-2.1	-2.3	-1.9	92	0.8	0.5	1	169	1.2525e-16	3.21e-14
TBB2A_MOUSE,	-1.3	-1.5	-1.1	76	-2.1	-2.2	-1.9	91	0.8	0.5	1	167	2.6301e-16	5.05e-14
B2RSN3_MOUSE,TBB2B_MOUSE,	-1.3	-1.5	-1.1	73	-2.1	-2.3	-1.9	87	0.8	0.6	1	160	3.5437e-16	5.44e-14
TBB5_MOUSE,	-1.2	-1.4	-1	71	-2	-2.2	-1.8	82	0.8	0.6	1	153	4.9992e-16	5.84e-14
ENOA_MOUSE,Q5FW97_MOUSE,	-1.2	-1.4	-1	111	-1.8	-2	-1.7	120	0.6	0.4	0.9	231	5.3245e-16	5.84e-14
TBB2C_MOUSE,	-1.2	-1.4	-1	71	-2	-2.2	-1.8	85	0.8	0.5	1	156	1.1867e-14	1.14e-12
TBB4_MOUSE,	-1.3	-1.5	-1.1	61	-2	-2.2	-1.8	69	0.7	0.5	1	130	1.1729e-11	9.85e-10
TBB3_MOUSE,	-1.1	-1.3	-0.9	61	-1.9	-2.1	-1.7	64	0.7	0.5	1	125	1.282e-11	9.85e-10
Q9QZ83_MOUSE,	-1.1	-1.3	-1	113	-1.6	-1.7	-1.4	112	0.4	0.2	0.7	225	4.8895e-08	3.41e-06
GPM6A_MOUSE,Q542P2_MOUSE,Q8R1P3_MOUSE,	0.6	0.2	0.9	18	-0.7	-1	-0.3	15	1.2	0.7	1.7	33	1.4813e-07	9.48e-06
B2KGT6_MOUSE,	0	-0.2	0.2	92	0.5	0.3	0.6	123	-0.5	-0.7	-0.2	215	6.5917e-07	3.89e-05
Q3URJ7_MOUSE,	0	-0.2	0.2	67	0.5	0.3	0.6	93	-0.5	-0.7	-0.2	160	7.9038e-06	0.00043358
Q5SX58_MOUSE,Q4FK59_MOUSE,ENOB_MOUSE,	-1	-1.3	-0.7	32	-1.7	-1.9	-1.4	34	0.7	0.3	1.1	66	1.2631e-05	0.000646707
MMSA_MOUSE,Q8K0L1_MOUSE,	-1.8	-2.4	-1.2	5	-3.3	-3.8	-2.9	8	1.6	0.8	2.3	13	4.1123e-05	0.0019739
SPTB2_MOUSE,	-0.3	-0.6	0	30	-1.3	-1.7	-0.8	18	1	0.5	1.5	48	6.8595e-05	0.00309888
K6PF_MOUSE,	-1.3	-1.7	-0.9	19	-2.3	-2.8	-1.9	12	1.1	0.5	1.6	31	8.6697e-05	0.00369907
Q3U7Z6_MOUSE,PGAM1_MOUSE,	-0.8	-1	-0.6	51	-1.3	-1.5	-1.1	45	0.5	0.2	0.8	96	0.00016132	0.00652072
K1C14_MOUSE,	6.6	6.4	6.9	38	5.8	5.5	6.2	27	0.8	0.4	1.2	65	0.00019942	0.00765773
EF1A2_MOUSE,	-0.3	-0.7	0.1	21	-1.4	-1.8	-0.9	10	1	0.5	1.6	31	0.00022176	0.00811008
ECHA_MOUSE,	-1	-1.7	-0.3	6	-3.5	-4.5	-2.7	6	2.6	1.5	3.8	12	0.00032099	0.0112055
NSF_MOUSE,	-0.8	-1.1	-0.5	26	-1.4	-1.6	-1.1	36	0.6	0.2	0.9	62	0.00054364	0.0181528
Q3UJA8_MOUSE,Q3URP6_MOUSE,Q3UA23_MOUSE,PDIA1_MOUSE,Q3UDR2_MOUSE,Q922C8_MOUSE,Q3TIM0_MOUSE,Q3TF72_MOUSE,Q3UBY9_MOUSE,Q3TGS0_MOUSE,Q3U738_MOUSE,Q3TWE3_MOUSE,Q3THC3_MOUSE,	1.9	1.2	2.7	4	-0.2	-1.3	0.8	2	2.2	0.9	3.4	6	0.00092299	0.0295357
PYC_MOUSE,Q3T9S7_MOUSE,Q3TCQ3_MOUSE,	-0.5	-0.8	-0.1	27	-1.4	-1.9	-0.9	18	0.9	0.3	1.5	45	0.0011114	0.0331894
STXB1_MOUSE,	0.7	0.4	0.9	41	0.2	0	0.5	47	0.5	0.1	0.8	88	0.0011236	0.0331894
Q71LX8_MOUSE,	-0.2	-0.5	0.2	21	-1	-1.4	-0.5	13	0.8	0.3	1.3	34	0.0014881	0.0423282
AT1A3_MOUSE,	-0.5	-0.7	-0.3	93	-0.8	-1	-0.6	71	0.3	0.1	0.6	164	0.0015721	0.0431205
Q3UF82_MOUSE,MK01_MOUSE,	0.8	0.4	1.2	13	-0.2	-0.8	0.4	9	1	0.3	1.7	22	0.0019406	0.0513924
MAP6_MOUSE,	0.7	0.5	0.9	73	1	0.8	1.2	89	-0.3	-0.5	-0.1	162	0.0023151	0.0582862
K6PP_MOUSE,Q8C605_MOUSE,	-1.4	-1.8	-0.9	10	-2.4	-2.9	-1.8	7	1	0.3	1.7	17	0.0023527	0.0582862
VATA_MOUSE,	-0.5	-0.6	-0.3	98	-0.7	-0.9	-0.6	111	0.3	0	0.5	209	0.0031231	0.0738513
Q3U733_MOUSE,	4.6	3.9	5.3	8	0	-0.7	0.7	3	4.6	3.6	5.5	11	0.0031733	0.0738513
Q3UCC6_MOUSE,SUCB1_MOUSE,Q3U6C7_MOUSE,	-0.4	-1	0.2	5	-1.5	-2.1	-1	6	1.1	0.3	1.9	11	0.0034957	0.0789617
NCAM1_MOUSE,	0.9	0.6	1.2	32	0.4	0.1	0.7	31	0.5	0.1	0.9	63	0.0037413	0.0820948
PLPP_MOUSE,	-0.2	-0.7	0.3	10	-1.2	-1.7	-0.7	7	1	0.3	1.7	17	0.0042966	0.0916608
HS74L_MOUSE,	-0.3	-0.6	0	30	-0.8	-1.2	-0.5	23	0.6	0.1	1	53	0.0044176	0.091695
Q58E64_MOUSE,EF1A1_MOUSE,Q3UA81_MOUSE,	-0.3	-0.7	0	22	-1.1	-1.5	-0.6	9	0.7	0.2	1.3	31	0.0047256	0.0955069
B2RTP7_MOUSE,K22E_MOUSE,	5.1	4.3	5.9	21	6.2	5.8	6.6	20	-1.1	-2	-0.3	41	0.0057132	0.112506
BASP1_MOUSE,	0.6	0.4	0.7	91	0.8	0.6	1	107	-0.2	-0.5	0	198	0.0068307	0.131149
GDIR1_MOUSE,	-0.2	-0.5	0.1	23	-0.7	-1	-0.4	17	0.5	0.1	1	40	0.0071434	0.133808
Q3TYL9_MOUSE,CN37_MOUSE,Q3TYV5_MOUSE,	-1	-1.2	-0.7	44	-0.6	-0.9	-0.4	49	-0.3	-0.6	0	93	0.0078278	0.142012
Q6PDH1_MOUSE,	0	-0.4	0.3	24	-0.6	-0.9	-0.2	22	0.5	0.1	1	46	0.0079512	0.142012
DYN1_MOUSE,	-0.8	-1.1	-0.4	22	-1.5	-1.9	-1	11	0.7	0.1	1.3	33	0.0086383	0.150778
Q3SYP5_MOUSE,Q3ZAW8_MOUSE,K1C16_MOUSE,Q9EQD6_MOUSE,Q9EQD7_MOUSE,	6.6	6.4	6.9	31	5.9	5.5	6.5	18	0.7	0.1	1.2	49	0.0095981	0.163808
Q6P1J1_MOUSE,	-0.1	-0.3	0.1	120	0.2	0	0.3	131	-0.2	-0.5	0	251	0.0099287	0.165766
Q3UGZ4_MOUSE,Q68FG2_MOUSE,	-0.7	-1.2	-0.1	7	-1.9	-2.7	-1.1	4	1.2	0.2	2.3	11	0.010372	0.169483
DPYL1_MOUSE,	0	-0.2	0.2	115	0.2	0	0.4	130	-0.2	-0.5	0	245	0.011977	0.191632
K1C15_MOUSE,B1AQ77_MOUSE,	6.6	6.3	7	22	5.9	5.5	6.5	26	0.7	0.1	1.3	48	0.014764	0.231403
Q3U232_MOUSE,Q3U1N0_MOUSE,COR1A_MOUSE,	-0.6	-1.1	0	6	-1.3	-1.7	-0.9	11	0.7	0.1	1.4	17	0.015251	0.234255
K1C10_MOUSE,A2A513_MOUSE,	6.7	6.4	7	30	6.3	6	6.6	38	0.4	0	0.8	68	0.016864	0.253952
K1C42_MOUSE,	6.7	6.2	7	17	5.7	4.9	6.4	9	1	0.1	1.8	26	0.018861	0.278562
Q3UNN1_MOUSE,Q8C2A3_MOUSE,SEPT7_MOUSE,	0	-0.4	0.5	10	-0.7	-1.2	-0.2	9	0.7	0.1	1.4	19	0.019269	0.279219
MYH9_MOUSE,	4.6	4	5.3	6	-0.5	-1.5	0.4	3	5.1	4	6.3	9	0.021202	0.30154
Q546G4_MOUSE,ALBU_MOUSE,	1.3	1.1	1.5	70	1.1	0.9	1.3	76	0.2	0	0.5	146	0.022908	0.316834
NCDN_MOUSE,	0.3	-0.1	0.8	10	-0.4	-0.9	0.1	9	0.7	0	1.4	19	0.023438	0.316834
Q6ZQ49_MOUSE,Q3UHK5_MOUSE,AT1A2_MOUSE,	-0.5	-0.8	-0.3	64	-0.8	-1.1	-0.6	50	0.3	0	0.6	114	0.023515	0.316834
Q3U0U5_MOUSE,CAP1_MOUSE,Q3UVJ2_MOUSE,Q8BPT7_MOUSE,	0.5	-0.7	1.7	2	-1.1	-1.7	-0.4	5	1.6	0.2	2.9	7	0.02468	0.326797
Q5M8M8_MOUSE,RL29_MOUSE,	-1	-1.7	-0.4	5	-0.1	-0.7	0.4	9	-0.9	-1.7	-0.1	14	0.026601	0.346264
SEP11_MOUSE,	0.5	0.1	0.9	13	-0.2	-0.6	0.3	11	0.7	0	1.3	24	0.027852	0.356506
A1L0X5_MOUSE,Q0VDN0_MOUSE,Q0VDM9_MOUSE,Q6IFT3_MOUSE,	6.5	5.5	7	9	5	4.4	5.6	15	1.4	0.3	2.3	24	0.028452	0.358215
Q4KML7_MOUSE,EZRI_MOUSE,Q3UL48_MOUSE,	-0.7	-1	-0.4	28	-0.3	-0.6	0.1	21	-0.4	-0.9	0	49	0.033883	0.419712
EFTU_MOUSE,	-0.6	-1.1	-0.2	8	-1.3	-1.9	-0.8	6	0.7	0	1.4	14	0.035259	0.429824
A2AMV7_MOUSE,Q923G3_MOUSE,A2AMW0_MOUSE,	-1.2	-1.6	-0.9	20	-1.7	-2	-1.3	18	0.4	0	0.8	38	0.036165	0.43398
GABT_MOUSE,	1.1	1	1.3	89	1	0.8	1.1	90	0.2	0	0.4	179	0.03783	0.446976
Q80U89_MOUSE,Q5SXR6_MOUSE,CLH_MOUSE,	0.6	0.3	0.8	41	0.1	-0.3	0.5	18	0.4	0	0.9	59	0.038873	0.450037
NCAN_MOUSE,	-0.7	-0.9	-0.4	38	-0.4	-0.6	-0.1	45	-0.3	-0.6	0	83	0.039261	0.450037
CAND1_MOUSE,	0	-0.6	0.6	6	-1	-1.9	-0.2	6	1	0	2.1	12	0.044781	0.505762
Q6P6I8_MOUSE,	0.5	-0.1	1.1	8	-0.5	-1.3	0.4	5	1	0	2	13	0.049398	0.535349
UBA1_MOUSE,B9EHN0_MOUSE,	-0.6	-0.8	-0.4	53	-0.8	-1	-0.6	56	0.2	-0.1	0.5	109	0.050392	0.535349
CENPV_MOUSE,	-0.5	-1	0	9	-1.1	-1.5	-0.7	13	0.6	-0.1	1.2	22	0.050432	0.535349
VAT1L_MOUSE,	4.9	3.7	5.8	10	3.5	2.7	4.3	5	1.4	-0.1	2.6	15	0.050644	0.535349
MAP4_MOUSE,	-0.8	-1.2	-0.2	20	-0.1	-0.5	0.4	27	-0.6	-1.3	0.1	47	0.050886	0.535349
AT1A1_MOUSE,	-0.5	-0.8	-0.3	57	-0.8	-1.1	-0.6	41	0.3	-0.1	0.6	98	0.05325	0.552649
Q3U861_MOUSE,Q3UJH5_MOUSE,Q3U684_MOUSE,VATD_MOUSE,Q3UK81_MOUSE,	-0.3	-0.8	0.1	13	-1	-1.5	-0.4	7	0.6	-0.1	1.3	20	0.056271	0.576215
MARCS_MOUSE,	1.4	1	1.8	14	1.8	1.5	2.2	20	-0.4	-0.9	0.1	34	0.057749	0.583569
DHE3_MOUSE,	0.2	-0.1	0.4	62	0	-0.2	0.2	74	0.2	-0.1	0.5	136	0.06329	0.631256
KCC2A_MOUSE,Q80TN1_MOUSE,	-0.8	-1.3	-0.4	9	-1.3	-1.8	-0.9	10	0.5	-0.1	1.1	19	0.074438	0.732928
B1AT92_MOUSE,GRB2_MOUSE,Q3U5I5_MOUSE,Q3U1Q4_MOUSE,	0.1	-0.4	0.6	6	0.7	0.2	1.2	9	-0.6	-1.3	0.1	15	0.077116	0.737289
SERA_MOUSE,	0.9	0.3	1.6	5	0.2	-0.4	0.8	7	0.8	-0.1	1.6	12	0.078102	0.737289
Q3UUU4_MOUSE,SEPT6_MOUSE,	0.1	-0.5	0.7	8	-1	-2.1	0.1	2	1.1	-0.2	2.3	10	0.078312	0.737289
B2RSR7_MOUSE,GPD1L_MOUSE,	0.2	-0.2	0.6	14	-0.2	-0.6	0.2	16	0.4	-0.1	0.9	30	0.078721	0.737289
SH3G2_MOUSE,A2ALV3_MOUSE,	-0.4	-0.8	-0.1	15	0	-0.4	0.3	20	-0.4	-0.9	0.1	35	0.082058	0.757193
ANK2_MOUSE,	0	-0.3	0.4	27	-0.4	-0.9	0	20	0.4	-0.1	1	47	0.082818	0.757193
A2APL7_MOUSE,Q3USU5_MOUSE,Q3UYK6_MOUSE,EAA2_MOUSE,A2APL8_MOUSE,A2APL5_MOUSE,	-1.4	-1.7	-1.1	26	-1.7	-2.1	-1.4	16	0.3	-0.1	0.8	42	0.084751	0.76575
Q3U4W8_MOUSE,UBP5_MOUSE,	0.1	-0.5	0.7	6	-0.7	-1.5	0.1	3	0.8	-0.2	1.8	9	0.087462	0.77039
SUCA_MOUSE,	-0.3	-0.7	0.1	14	-0.8	-1.3	-0.3	11	0.5	-0.1	1.1	25	0.087702	0.77039
Q545P0_MOUSE,Q3TSQ1_MOUSE,AT1B1_MOUSE,	-0.6	-1.1	-0.2	10	-1.1	-1.5	-0.7	13	0.5	-0.1	1.1	23	0.088503	0.77039
SAHH2_MOUSE,	-0.8	-1.3	-0.4	13	-1.3	-1.7	-0.9	19	0.5	-0.1	1.1	32	0.089277	0.77039
H4_MOUSE,B2RTM0_MOUSE,	5.3	4.5	6.1	3	6.2	5.4	7	4	-0.9	-2	0.2	7	0.091431	0.780211
Q3U0T9_MOUSE,RAB35_MOUSE,	0.9	0.4	1.4	8	0.4	-0.1	0.9	9	0.5	-0.1	1.2	17	0.092797	0.783166
Q8C845_MOUSE,	0	-0.4	0.4	18	0.4	0	0.7	22	-0.4	-0.9	0.1	40	0.1005	0.838957
SAHH3_MOUSE,	-0.8	-1.2	-0.3	14	-1.2	-1.6	-0.8	18	0.4	-0.1	1	32	0.10597	0.85928
VATB2_MOUSE,	-0.6	-0.8	-0.4	63	-0.8	-1	-0.6	88	0.2	-0.1	0.4	151	0.10601	0.85928
CH60_MOUSE,	0	-0.3	0.3	35	-0.3	-0.5	0	49	0.3	-0.1	0.6	84	0.10687	0.85928
ADT1_MOUSE,Q8BVI9_MOUSE,	-1	-1.2	-0.7	26	-1.2	-1.6	-0.9	21	0.3	-0.1	0.7	47	0.10741	0.85928
Q4FJK0_MOUSE,DECR_MOUSE,	-0.3	-0.8	0.3	7	-0.9	-1.4	-0.3	7	0.6	-0.2	1.4	14	0.11021	0.867219
Q5SX22_MOUSE,Q6NZC5_MOUSE,Q3TH47_MOUSE,Q8VC46_MOUSE,Q78XY9_MOUSE,Q922B0_MOUSE,A5JUZ1_MOUSE,Q8R0Z9_MOUSE,Q8C2K3_MOUSE,Q66JP1_MOUSE,UBIQ_MOUSE,Q922Z8_MOUSE,Q642L7_MOUSE,	0.2	-0.2	0.6	19	-0.2	-0.5	0.1	26	0.4	-0.1	0.9	45	0.11165	0.867219
SRR_MOUSE,	-0.6	-1.4	0.1	3	-1.5	-2.4	-0.6	3	0.9	-0.3	2	6	0.11179	0.867219
KIF2A_MOUSE,	-0.4	-0.9	0.1	9	-1	-1.7	-0.4	6	0.6	-0.2	1.4	15	0.11509	0.875444
VATE1_MOUSE,	-0.2	-0.6	0.1	18	0.1	-0.2	0.4	27	-0.3	-0.7	0.1	45	0.11513	0.875444
Q91V55_MOUSE,	-1.3	-1.8	-0.7	6	-1.8	-2.3	-1.3	6	0.5	-0.2	1.3	12	0.12834	0.959262
ATPB_MOUSE,	-0.4	-0.6	-0.2	89	-0.6	-0.7	-0.4	113	0.2	-0.1	0.4	202	0.1288	0.959262
Q6NXI9_MOUSE,KIF5C_MOUSE,Q8CHF1_MOUSE,	-0.2	-0.6	0.2	13	-0.7	-1.3	-0.1	11	0.5	-0.2	1.2	24	0.1299	0.959262
Q3TI62_MOUSE,TCPZ_MOUSE,Q52KG9_MOUSE,Q3TW97_MOUSE,Q3TI05_MOUSE,Q3TIX8_MOUSE,	0.1	-0.7	1	3	-0.7	-1.4	0	6	0.8	-0.3	1.9	9	0.13338	0.975579
CAH2_MOUSE,	0.2	0	0.5	43	0.4	0.2	0.6	48	-0.2	-0.5	0.1	91	0.14257	1
Q547J4_MOUSE,	0.3	0.1	0.5	63	0.5	0.3	0.7	81	-0.2	-0.4	0.1	144	0.14279	1
SEPT5_MOUSE,	0	-0.5	0.5	8	-0.5	-1	0.1	8	0.5	-0.2	1.2	16	0.1434	1
PIMT_MOUSE,Q545L9_MOUSE,	0	-0.9	0.8	4	-0.9	-1.8	0	4	0.9	-0.4	2.1	8	0.14466	1
IDH3A_MOUSE,	0.2	-0.1	0.4	37	-0.1	-0.3	0.2	44	0.2	-0.1	0.5	81	0.14598	1
CYFP1_MOUSE,	-0.6	-1.1	-0.2	13	-1.2	-1.9	-0.5	8	0.6	-0.2	1.4	21	0.14716	1
Q543Y7_MOUSE,PACN1_MOUSE,	-0.1	-0.4	0.1	36	0.1	-0.2	0.3	36	-0.2	-0.5	0.1	72	0.14982	1
Q3V3U0_MOUSE,PYGB_MOUSE,Q3UYH9_MOUSE,A2AWQ5_MOUSE,	-0.8	-1	-0.6	80	-0.9	-1.1	-0.7	75	0.2	-0.1	0.4	155	0.15172	1
2AAA_MOUSE,Q8C2E1_MOUSE,	0.1	-0.3	0.4	23	-0.2	-0.5	0.1	26	0.3	-0.2	0.7	49	0.15498	1
Q3UJH8_MOUSE,	0.3	0.1	0.5	95	0.1	0	0.3	89	0.1	-0.1	0.4	184	0.15616	1
Q3UEJ7_MOUSE,Q3UJ34_MOUSE,ASSY_MOUSE,	-0.1	-0.7	0.5	7	-0.7	-1.5	0.1	4	0.7	-0.3	1.6	11	0.16058	1
Q3TW74_MOUSE,Q8R013_MOUSE,	0.4	0	0.7	24	0	-0.3	0.4	18	0.3	-0.2	0.8	42	0.16257	1
ARK72_MOUSE,A2AMV3_MOUSE,	-1.1	-1.7	-0.4	4	-1.8	-2.6	-0.9	2	0.7	-0.3	1.8	6	0.16285	1
Q91XH5_MOUSE,	-0.2	-0.6	0.1	19	-0.6	-0.9	-0.2	14	0.3	-0.2	0.8	33	0.16586	1
K2C6A_MOUSE,	6.5	6.2	6.8	26	6.2	5.9	6.5	19	0.3	-0.2	0.7	45	0.16641	1
CRYM_MOUSE,Q3UPX0_MOUSE,	-0.8	-1.1	-0.5	31	-0.6	-0.9	-0.3	35	-0.2	-0.6	0.1	66	0.16932	1
SPRE_MOUSE,	-0.2	-0.6	0.1	20	-0.6	-1	-0.2	14	0.3	-0.2	0.8	34	0.16939	1
B1AQW3_MOUSE,Q3UH19_MOUSE,	0.3	0.1	0.5	63	0.5	0.3	0.7	81	-0.2	-0.4	0.1	144	0.17056	1
MCCB_MOUSE,B2RUK5_MOUSE,	0.1	-0.5	0.8	9	0.7	0.2	1.2	10	-0.6	-1.4	0.3	19	0.1713	1
B2RXX6_MOUSE,A3KGU7_MOUSE,B9EKJ1_MOUSE,	-0.4	-0.6	-0.3	133	-0.5	-0.7	-0.4	159	0.1	-0.1	0.3	292	0.17179	1
Q3UAS2_MOUSE,CAZA1_MOUSE,Q3TLJ0_MOUSE,Q5RKN9_MOUSE,	-0.9	-1.4	-0.4	7	-1.4	-1.9	-0.9	7	0.5	-0.3	1.2	14	0.1718	1
1433Z_MOUSE,	0	-0.2	0.2	110	-0.1	-0.2	0.1	130	0.1	-0.1	0.3	240	0.17664	1
Q5DQJ3_MOUSE,CAZA2_MOUSE,	-1.4	-1.8	-1.1	16	-1.7	-2.1	-1.4	15	0.3	-0.2	0.8	31	0.17942	1
ACY2_MOUSE,B2KFD4_MOUSE,	-0.1	-0.7	0.5	7	0.4	-0.1	0.9	7	-0.5	-1.3	0.3	14	0.18325	1
Q3UWU7_MOUSE,DIRA2_MOUSE,	4.8	4	5.4	11	4.1	3.6	4.8	9	0.6	-0.4	1.4	20	0.18463	1
TENR_MOUSE,A2RT70_MOUSE,	-0.1	-0.4	0.2	35	-0.3	-0.6	-0.1	34	0.2	-0.2	0.6	69	0.18617	1
AT5F1_MOUSE,Q5I0W0_MOUSE,	-0.7	-1.2	-0.3	10	-1.1	-1.5	-0.7	10	0.4	-0.2	0.9	20	0.18629	1
PGAM2_MOUSE,Q5NCI4_MOUSE,	-0.7	-1.1	-0.4	18	-1	-1.4	-0.7	14	0.3	-0.2	0.8	32	0.19182	1
K22O_MOUSE,	6.7	6.3	7	16	6.3	5.9	6.8	8	0.3	-0.2	0.9	24	0.19463	1
CLCB_MOUSE,	0.2	-0.4	0.9	5	0.7	0.2	1.2	10	-0.5	-1.3	0.3	15	0.19813	1
D1FNM8_MOUSE,	-1	-1.6	-0.4	6	-1.5	-2.2	-0.9	4	0.5	-0.3	1.4	10	0.19897	1
1433G_MOUSE,A8IP69_MOUSE,	0	-0.2	0.2	70	-0.1	-0.3	0.1	61	0.1	-0.1	0.4	131	0.20016	1
Q5EBG5_MOUSE,Q6P1A9_MOUSE,Q58ET1_MOUSE,Q80UT7_MOUSE,RL7A_MOUSE,	-0.9	-1.3	-0.5	13	-1.3	-1.7	-0.8	9	0.3	-0.2	0.9	22	0.20034	1
CMC1_MOUSE,	-0.9	-1.4	-0.4	13	-1.3	-1.9	-0.9	12	0.4	-0.3	1.1	25	0.201	1
A3KML3_MOUSE,1433T_MOUSE,	0.2	0	0.5	52	0.1	-0.1	0.3	58	0.2	-0.1	0.4	110	0.20514	1
LDHB_MOUSE,	0.3	0.1	0.5	62	0.2	0	0.4	73	0.1	-0.1	0.4	135	0.20686	1
Q3UDK4_MOUSE,	-0.2	-0.5	0.2	23	-0.4	-0.8	-0.1	22	0.3	-0.2	0.7	45	0.20799	1
Q3UGW4_MOUSE,CLPP_MOUSE,	0.6	0.1	1	8	0.1	-0.4	0.7	10	0.4	-0.3	1.1	18	0.21218	1
SYN1_MOUSE,	-0.2	-0.4	-0.1	84	-0.1	-0.3	0.1	89	-0.1	-0.4	0.1	173	0.21296	1
NDRG2_MOUSE,	-0.3	-0.9	0.3	6	-0.8	-1.4	-0.1	6	0.5	-0.3	1.3	12	0.21768	1
GSTM1_MOUSE,	0.2	0	0.4	69	0.3	0.1	0.5	72	-0.1	-0.4	0.1	141	0.21806	1
AMPH_MOUSE,	-0.3	-0.7	0	15	-0.1	-0.4	0.3	18	-0.3	-0.8	0.2	33	0.21894	1
Q9DC07_MOUSE,	-0.8	-1.2	-0.4	17	-0.5	-0.9	-0.1	14	-0.3	-0.9	0.2	31	0.22374	1
PCKGM_MOUSE,	-1	-1.6	-0.3	6	-0.5	-1.1	0.1	8	-0.5	-1.3	0.4	14	0.22626	1
CLIP1_MOUSE,	-0.3	-0.7	0.2	16	0.1	-0.4	0.5	15	-0.4	-1	0.3	31	0.22791	1
D2KHZ9_MOUSE,G3P_MOUSE,	-0.3	-0.4	-0.1	166	-0.2	-0.4	-0.1	193	-0.1	-0.2	0.1	359	0.22841	1
SBP1_MOUSE,	0.3	-0.3	0.9	7	0.7	0.2	1.2	11	-0.4	-1.1	0.3	18	0.23665	1
CNTN1_MOUSE,	0.2	-0.1	0.4	44	0.3	0.1	0.5	60	-0.2	-0.4	0.1	104	0.24332	1
Q91VA7_MOUSE,	0	-0.3	0.3	37	-0.2	-0.4	0.1	45	0.2	-0.2	0.6	82	0.24366	1
Q3U6J9_MOUSE,Q3U6W3_MOUSE,Q3TEL0_MOUSE,PPT1_MOUSE,Q8VBX5_MOUSE,Q3UB92_MOUSE,	0.2	-0.4	0.8	5	0.7	0	1.3	7	-0.5	-1.3	0.4	12	0.24755	1
Q8VDX8_MOUSE,SYHC_MOUSE,Q3TKU3_MOUSE,Q3U890_MOUSE,	0.5	0	0.9	10	0.1	-0.4	0.6	10	0.4	-0.3	1	20	0.24843	1
NEUG_MOUSE,	-0.7	-1.3	-0.1	6	-1.1	-1.7	-0.5	5	0.5	-0.4	1.3	11	0.25174	1
B1AXW7_MOUSE,PRDX1_MOUSE,	-0.3	-0.6	0	19	-0.5	-0.8	-0.2	28	0.2	-0.2	0.6	47	0.25184	1
Q4FJX4_MOUSE,CSRP1_MOUSE,	-0.4	-0.8	0	12	-0.1	-0.5	0.2	15	-0.3	-0.7	0.2	27	0.25323	1
MA7D2_MOUSE,	0.5	-0.4	1.3	3	1.1	0.4	1.7	4	-0.6	-1.7	0.5	7	0.2535	1
ADT2_MOUSE,Q545A2_MOUSE,	-1.2	-1.5	-0.9	20	-1.4	-1.8	-1.1	16	0.2	-0.2	0.7	36	0.25489	1
Q3U3S0_MOUSE,STRN4_MOUSE,	-1.1	-2.1	-0.1	2	-0.4	-1.1	0.3	5	-0.7	-1.8	0.5	7	0.25741	1
AUHM_MOUSE,	-0.3	-0.6	0.1	17	0	-0.4	0.4	15	-0.3	-0.8	0.3	32	0.25858	1
SFPQ_MOUSE,	-0.4	-0.7	0	20	-0.1	-0.5	0.2	18	-0.2	-0.7	0.2	38	0.26562	1
Q3UGC2_MOUSE,	-0.7	-1.1	-0.4	20	-0.5	-0.8	-0.2	24	-0.2	-0.6	0.2	44	0.26841	1
EPN1_MOUSE,	-0.5	-1.3	0.2	6	-0.1	-0.6	0.5	7	-0.5	-1.4	0.4	13	0.27169	1
Q8R0X4_MOUSE,CSK21_MOUSE,Q61177_MOUSE,	-0.4	-0.7	0	16	-0.1	-0.5	0.2	17	-0.3	-0.8	0.2	33	0.27254	1
Q3UEW2_MOUSE,	-0.8	-1.7	0.2	3	0	-1.1	1.1	2	-0.8	-2.2	0.7	5	0.27501	1
Q6P1B9_MOUSE,BIN1_MOUSE,	-0.4	-0.8	0.1	10	-0.1	-0.5	0.3	13	-0.3	-0.9	0.3	23	0.27564	1
B2RQQ5_MOUSE,	-0.1	-0.5	0.2	34	-0.3	-0.6	0	35	0.2	-0.2	0.6	69	0.27588	1
Q9DD05_MOUSE,HEM2_MOUSE,	0.8	0.3	1.3	8	1.1	0.7	1.6	11	-0.3	-1	0.3	19	0.28139	1
TERA_MOUSE,	-0.5	-0.8	-0.2	38	-0.7	-1	-0.4	28	0.2	-0.2	0.6	66	0.28471	1
HOME1_MOUSE,	-0.8	-2	0.3	2	-0.1	-1.1	1	3	-0.8	-2.3	0.7	5	0.28509	1
Q53YX2_MOUSE,THY1_MOUSE,	0.7	0.4	1	37	0.9	0.6	1.1	36	-0.2	-0.5	0.2	73	0.28784	1
Q543K5_MOUSE,SERC_MOUSE,Q3ULZ3_MOUSE,	0.2	-0.1	0.5	23	0.4	0.1	0.7	23	-0.2	-0.6	0.2	46	0.2924	1
PDIA3_MOUSE,	-0.1	-0.3	0.2	33	0.1	-0.1	0.3	45	-0.2	-0.5	0.2	78	0.29324	1
IPYR2_MOUSE,	0.4	-0.2	1	10	0	-0.4	0.5	11	0.4	-0.4	1.1	21	0.29418	1
Q542X7_MOUSE,TCPB_MOUSE,	0	-1.1	1.2	2	-0.7	-1.6	0.2	4	0.8	-0.7	2.2	6	0.29592	1
TALDO_MOUSE,	0.1	-0.2	0.4	21	0.3	0	0.7	18	-0.2	-0.7	0.2	39	0.29786	1
HNRPK_MOUSE,Q3TL71_MOUSE,Q3U9Q3_MOUSE,Q5FWJ5_MOUSE,Q3TUA1_MOUSE,Q3TJ38_MOUSE,B2M1R6_MOUSE,Q3U6X2_MOUSE,	0	-0.8	0.9	9	-0.5	-1.1	0.1	7	0.5	-0.5	1.6	16	0.30255	1
Q8K354_MOUSE,	0.5	-0.4	1.4	4	-0.1	-1.1	0.7	3	0.6	-0.6	2	7	0.30569	1
RL7_MOUSE,Q5M9N8_MOUSE,Q3UBI6_MOUSE,	-2	-2.9	-1.3	4	-2.6	-3.8	-1.8	3	0.6	-0.7	2	7	0.30647	1
PP1A_MOUSE,	-0.1	-0.4	0.2	26	-0.3	-0.6	0	34	0.2	-0.2	0.6	60	0.30655	1
MOES_MOUSE,	-0.2	-0.6	0.1	23	0	-0.4	0.3	20	-0.2	-0.7	0.2	43	0.30678	1
A2AE27_MOUSE,	-0.2	-0.7	0.3	7	-0.6	-1.2	0.1	6	0.4	-0.4	1.2	13	0.3068	1
Q80YU5_MOUSE,MOG_MOUSE,Q66JM2_MOUSE,Q3UY21_MOUSE,	-0.3	-0.8	0.3	9	-0.6	-1	-0.2	10	0.3	-0.3	1	19	0.30934	1
AP2A1_MOUSE,	0.1	-0.3	0.6	15	-0.2	-0.8	0.3	11	0.3	-0.4	1	26	0.31024	1
AMPB_MOUSE,Q3TX27_MOUSE,	-1.4	-2.3	-0.4	2	-0.7	-1.7	0.3	3	-0.7	-2.1	0.7	5	0.31164	1
Q543F6_MOUSE,CDK5_MOUSE,	-0.5	-1.2	0.2	5	-1	-1.9	-0.2	4	0.5	-0.6	1.7	9	0.3126	1
SYWC_MOUSE,Q4FJZ4_MOUSE,Q3UDG2_MOUSE,Q3U6U7_MOUSE,	-0.4	-1.2	0.3	4	-1	-1.7	-0.2	4	0.5	-0.5	1.5	8	0.31361	1
PGCA_MOUSE,	-1.6	-2.6	-0.6	2	-2.3	-3.2	-1.3	2	0.7	-0.8	2	4	0.31395	1
SIRT2_MOUSE,Q3UJK6_MOUSE,	-1	-1.6	-0.4	7	-0.6	-1.2	-0.1	9	-0.4	-1.2	0.4	16	0.3144	1
RB6I2_MOUSE,	-0.9	-1.5	-0.2	5	-0.4	-1.1	0.3	5	-0.5	-1.4	0.5	10	0.3152	1
Q3B7Y7_MOUSE,CLM7_MOUSE,Q3TEQ8_MOUSE,	-2	-2.9	-1.1	2	-2.6	-3.4	-1.8	2	0.6	-0.6	1.8	4	0.31524	1
GNPI1_MOUSE,Q91WJ4_MOUSE,	0.7	0.1	1.3	7	0.3	-0.4	0.9	5	0.4	-0.5	1.3	12	0.31984	1
Q3TKZ9_MOUSE,Q8CE21_MOUSE,Q6ZQK6_MOUSE,Q3UI16_MOUSE,	0.3	-0.5	1	4	0.9	-0.2	1.9	2	-0.6	-1.9	0.7	6	0.32003	1
Q69ZW4_MOUSE,Q6PEE6_MOUSE,Q8C2J5_MOUSE,	0.1	-0.2	0.5	20	-0.1	-0.6	0.3	16	0.3	-0.3	0.9	36	0.32162	1
CISY_MOUSE,	0.2	0	0.5	40	0.1	-0.1	0.3	54	0.1	-0.2	0.5	94	0.32351	1
RAB5C_MOUSE,Q3TJ39_MOUSE,	0.3	-0.2	0.9	8	0	-0.4	0.5	9	0.3	-0.4	1	17	0.32726	1
Q80X68_MOUSE,Q9DAM4_MOUSE,	0.2	-0.2	0.6	18	0	-0.4	0.4	18	0.2	-0.3	0.7	36	0.33099	1
DCTN2_MOUSE,Q3TPZ5_MOUSE,	0.1	-0.5	0.8	4	0.6	-0.2	1.7	4	-0.5	-1.8	0.6	8	0.33278	1
Q545N7_MOUSE,KCRU_MOUSE,	0	-0.2	0.3	35	0.2	-0.1	0.4	53	-0.1	-0.4	0.2	88	0.33712	1
LSAMP_MOUSE,Q3TYE5_MOUSE,	0.7	0.3	1.1	14	0.9	0.6	1.3	15	-0.2	-0.7	0.3	29	0.3379	1
SCG2_MOUSE,	3.3	2.6	4.4	3	3.9	3.3	4.6	3	-0.6	-1.6	0.7	6	0.33955	1
A1A4T2_MOUSE,GANAB_MOUSE,	-0.1	-0.7	0.4	7	0.3	-0.4	0.9	7	-0.4	-1.2	0.5	14	0.34285	1
2AAB_MOUSE,Q8BIX1_MOUSE,Q3TTF6_MOUSE,	0.1	-0.5	0.7	8	-0.2	-0.7	0.2	11	0.3	-0.4	1.1	19	0.34479	1
H2A2A_MOUSE,Q149V4_MOUSE,H2A2C_MOUSE,B2RWH3_MOUSE,Q64426_MOUSE,	-1.6	-2.2	-0.9	8	-1.2	-1.7	-0.6	7	-0.4	-1.2	0.4	15	0.34489	1
Q8CGP4_MOUSE,	-1.6	-2.2	-0.9	7	-1.2	-1.7	-0.6	6	-0.4	-1.2	0.4	13	0.34489	1
ATPA_MOUSE,	-0.5	-0.8	-0.3	60	-0.7	-0.9	-0.5	67	0.1	-0.2	0.4	127	0.34509	1
Q99N15_MOUSE,	0.5	0.2	0.8	40	0.3	0.1	0.6	34	0.1	-0.2	0.5	74	0.34628	1
NUDT9_MOUSE,	0.2	-0.7	0.9	4	0.7	-0.3	1.7	2	-0.6	-1.9	0.6	6	0.34671	1
Q66JR8_MOUSE,	-0.4	-1.4	0.5	3	0.3	-0.8	1.4	2	-0.7	-2.2	0.8	5	0.34846	1
ERMIN_MOUSE,	0.3	-0.6	1.1	2	0.8	-0.1	1.8	3	-0.6	-1.9	0.7	5	0.34919	1
Q76LV5_MOUSE,Q6P716_MOUSE,RASH_MOUSE,	0.8	-0.1	1.8	3	0.2	-0.7	1.2	2	0.6	-0.7	2	5	0.34923	1
EEA1_MOUSE,	0.2	-0.3	0.7	12	0.5	0	0.9	12	-0.3	-1	0.4	24	0.35005	1
1433S_MOUSE,Q3TEZ1_MOUSE,Q9JJ20_MOUSE,	0.2	-0.3	0.6	14	-0.1	-0.5	0.3	9	0.3	-0.3	0.8	23	0.35599	1
GSTP1_MOUSE,	0.4	0.1	0.7	32	0.5	0.3	0.8	41	-0.1	-0.5	0.2	73	0.35639	1
A2ARP8_MOUSE,MAP1A_MOUSE,	-0.8	-1.1	-0.6	47	-0.7	-0.9	-0.5	61	-0.1	-0.4	0.2	108	0.35669	1
BLVRB_MOUSE,Q3U6G1_MOUSE,	0.4	-0.2	0.9	9	0.7	0.2	1.1	12	-0.3	-1	0.4	21	0.35875	1
CPNE6_MOUSE,	-1.2	-1.6	-0.9	16	-1.4	-1.8	-1.1	13	0.2	-0.3	0.7	29	0.3597	1
Q3UAV7_MOUSE,Q8C338_MOUSE,IDHC_MOUSE,Q5HZJ8_MOUSE,	0.7	0.4	1	29	0.8	0.5	1.2	21	-0.2	-0.6	0.3	50	0.36156	1
ERC2_MOUSE,Q5J8K6_MOUSE,Q3UHT7_MOUSE,Q5J8K8_MOUSE,	-0.6	-1	-0.1	11	-0.3	-0.8	0.2	10	-0.3	-0.9	0.4	21	0.36176	1
MYH11_MOUSE,Q8R384_MOUSE,Q69ZX3_MOUSE,	-0.1	-1.2	0.9	4	-0.8	-1.7	0.2	3	0.6	-0.8	2	7	0.36252	1
Q5EBQ0_MOUSE,	0.6	-0.3	1.5	3	0.1	-0.6	0.9	4	0.5	-0.6	1.6	7	0.36308	1
QORL1_MOUSE,	0.6	-0.1	1.4	4	0.2	-0.4	0.8	6	0.4	-0.6	1.5	10	0.36556	1
APEH_MOUSE,	0.6	0	1.1	10	0.2	-0.3	0.8	8	0.3	-0.4	1.1	18	0.36804	1
RAP1B_MOUSE,Q52L50_MOUSE,	0	-0.9	0.8	3	0.4	-0.2	0.9	6	-0.4	-1.4	0.5	9	0.36939	1
VA0D1_MOUSE,Q921S5_MOUSE,	0	-0.9	1	2	-0.5	-1.4	0.3	3	0.5	-0.7	1.8	5	0.37102	1
NDUAA_MOUSE,	-0.4	-1.6	0.7	2	-1.1	-2	-0.2	3	0.6	-0.8	2.1	5	0.37359	1
NEGR1_MOUSE,A0A4W9_MOUSE,	1.6	1.1	2.2	7	1.9	1.4	2.5	6	-0.3	-1.1	0.4	13	0.37708	1
KIF5A_MOUSE,	-0.1	-0.7	0.5	7	-0.5	-1.3	0.2	7	0.4	-0.5	1.3	14	0.37796	1
Q32M04_MOUSE,Q8C5R8_MOUSE,	-0.9	-1.6	-0.1	3	-1.3	-2.1	-0.5	2	0.5	-0.6	1.5	5	0.37858	1
Q9CZP6_MOUSE,RS3_MOUSE,Q5YLW3_MOUSE,	-1	-1.5	-0.5	8	-1.3	-1.9	-0.7	6	0.3	-0.5	1.1	14	0.38107	1
Q3TMU8_MOUSE,DPYL4_MOUSE,	-0.2	-0.5	0	30	-0.1	-0.3	0.2	41	-0.1	-0.5	0.2	71	0.38173	1
Q3TG52_MOUSE,Q3U367_MOUSE,AL9A1_MOUSE,Q3V1N7_MOUSE,Q3THE7_MOUSE,Q3TMT4_MOUSE,	0.4	-0.1	0.9	8	0.1	-0.5	0.7	6	0.3	-0.4	1.1	14	0.38275	1
PSA1_MOUSE,Q3TS44_MOUSE,	0.5	0.2	0.8	25	0.3	0	0.6	26	0.2	-0.2	0.5	51	0.38305	1
RAB6B_MOUSE,Q0PD53_MOUSE,	-0.7	-1.6	0.2	3	-0.2	-1.1	0.8	2	-0.6	-1.8	0.8	5	0.38313	1
Q3THU8_MOUSE,MPCP_MOUSE,	-0.8	-1.2	-0.3	10	-1	-1.4	-0.6	11	0.2	-0.4	0.9	21	0.38732	1
Q3TN61_MOUSE,Q4VAE6_MOUSE,RHOA_MOUSE,	0.4	-0.2	0.9	12	0.1	-0.5	0.6	9	0.3	-0.4	1	21	0.39033	1
PRDX3_MOUSE,	0	-0.3	0.3	22	-0.2	-0.5	0.1	25	0.2	-0.3	0.6	47	0.39197	1
Q5RJH8_MOUSE,GPX1_MOUSE,	0.6	-0.2	1.5	4	0.1	-0.7	1	3	0.5	-0.7	1.6	7	0.39334	1
UCHL1_MOUSE,	0.8	0.6	1	49	0.7	0.5	0.9	51	0.1	-0.2	0.4	100	0.39354	1
SYN2_MOUSE,	-0.2	-0.5	0	45	-0.1	-0.3	0.1	56	-0.1	-0.4	0.2	101	0.39574	1
Q542X2_MOUSE,GMPR2_MOUSE,	0	-0.6	0.6	5	-0.4	-1.1	0.3	4	0.4	-0.6	1.3	9	0.40092	1
KCRB_MOUSE,	0.1	-0.1	0.2	185	0	-0.2	0.1	229	0.1	-0.1	0.3	414	0.4014	1
PDXK_MOUSE,	1.1	0.9	1.4	41	1	0.8	1.3	50	0.1	-0.2	0.4	91	0.40217	1
PYGM_MOUSE,	-0.8	-1.1	-0.5	24	-1	-1.3	-0.7	24	0.2	-0.3	0.6	48	0.40347	1
Q91WK9_MOUSE,Q5EBQ7_MOUSE,MSRA_MOUSE,	0.5	-0.3	1.3	4	0.1	-0.5	0.7	7	0.4	-0.6	1.4	11	0.40438	1
Q543N3_MOUSE,LASP1_MOUSE,	0.5	0.2	0.8	21	0.6	0.3	1	24	-0.2	-0.6	0.3	45	0.40601	1
Q542V3_MOUSE,A2A837_MOUSE,	0.2	-0.2	0.7	9	0.6	-0.1	1.3	5	-0.3	-1.1	0.5	14	0.40686	1
A2AE04_MOUSE,EIF3I_MOUSE,	0.1	-0.8	0.9	4	0.4	-0.1	1	6	-0.4	-1.4	0.6	10	0.40757	1
Q3UQ73_MOUSE,	-0.6	-1.1	-0.2	12	-0.9	-1.4	-0.4	10	0.3	-0.4	1	22	0.41081	1
WIPF3_MOUSE,	-2.1	-2.7	-1.6	6	-1.8	-2.5	-1	4	-0.4	-1.3	0.6	10	0.41121	1
HS12A_MOUSE,	-1.5	-1.9	-1	10	-1.8	-2.3	-1.2	7	0.3	-0.4	1	17	0.41232	1
PP2BA_MOUSE,B2RRX2_MOUSE,	-1.2	-1.5	-0.9	31	-1	-1.3	-0.8	38	-0.1	-0.5	0.2	69	0.41457	1
Q3U8U8_MOUSE,Q99L36_MOUSE,Q8BN32_MOUSE,PABP1_MOUSE,	-0.3	-0.8	0.1	12	-0.1	-0.6	0.4	10	-0.3	-0.9	0.4	22	0.41876	1
PPID_MOUSE,	0.2	-0.3	0.7	8	0.5	-0.1	1.1	12	-0.3	-1.1	0.4	20	0.41934	1
Q3U561_MOUSE,Q5XJF6_MOUSE,	-0.4	-0.8	0	14	-0.6	-1	-0.2	11	0.2	-0.4	0.8	25	0.42068	1
B1AWD9_MOUSE,B1AWD8_MOUSE,	0.3	-0.3	0.9	6	0.6	0	1.2	4	-0.3	-1.1	0.5	10	0.42261	1
TMOD2_MOUSE,	-0.3	-0.8	0.2	8	-0.1	-0.5	0.4	7	-0.3	-1	0.4	15	0.42596	1
PP2BB_MOUSE,	-1.1	-1.4	-0.7	19	-0.9	-1.2	-0.6	24	-0.2	-0.6	0.3	43	0.42638	1
BLMH_MOUSE,	0.3	-0.1	0.8	12	0.6	0.2	1	13	-0.2	-0.9	0.4	25	0.42721	1
GLNA_MOUSE,	-0.3	-0.5	0	70	-0.3	-0.5	-0.2	88	0.1	-0.2	0.3	158	0.42981	1
HDHD2_MOUSE,	0.5	-0.2	1.1	4	0.2	-0.3	0.6	8	0.3	-0.5	1.1	12	0.43097	1
Q3TG21_MOUSE,VATC1_MOUSE,	0.1	-0.6	0.8	5	-0.3	-1.2	0.5	4	0.4	-0.6	1.5	9	0.4324	1
Q3U995_MOUSE,	-0.8	-1.3	-0.3	9	-1	-1.5	-0.6	10	0.2	-0.4	0.9	19	0.43384	1
Q0PD49_MOUSE,RAB8B_MOUSE,	0	-0.6	0.6	5	-0.3	-0.8	0.3	5	0.3	-0.5	1.1	10	0.43431	1
ACTY_MOUSE,	-0.1	-0.8	0.5	5	-0.4	-1	0.1	7	0.3	-0.5	1.1	12	0.43735	1
ROA2_MOUSE,	-0.2	-0.4	0	53	-0.1	-0.4	0.1	52	-0.1	-0.4	0.2	105	0.43766	1
NEUM_MOUSE,	2.3	2.1	2.5	43	2.2	2	2.4	50	0.1	-0.2	0.4	93	0.4382	1
A2AEX8_MOUSE,A2AEX6_MOUSE,	1	0.4	1.7	7	1.3	0.8	1.8	10	-0.3	-1.1	0.5	17	0.4388	1
Q3TWT2_MOUSE,MEMO1_MOUSE,	-0.5	-1.6	0.7	2	0.1	-0.8	1	3	-0.5	-2	0.9	5	0.43888	1
A7VMV2_MOUSE,CRYL1_MOUSE,	-0.1	-0.7	0.4	8	0.2	-0.4	0.7	7	-0.3	-1.1	0.5	15	0.44028	1
Q4VAA1_MOUSE,Q3UCX7_MOUSE,RAB5A_MOUSE,	0.2	-0.4	0.7	8	-0.1	-0.6	0.4	9	0.3	-0.4	1	17	0.44045	1
Q80TH1_MOUSE,	-1	-1.6	-0.3	5	-1.3	-2	-0.6	7	0.4	-0.6	1.3	12	0.44049	1
DREB_MOUSE,	-1	-1.3	-0.6	18	-0.8	-1.2	-0.4	15	-0.2	-0.6	0.3	33	0.44136	1
DDAH2_MOUSE,	-0.2	-0.9	0.4	6	0.1	-0.5	0.7	6	-0.3	-1.2	0.6	12	0.44817	1
LANC1_MOUSE,B2KGR1_MOUSE,	0.4	0	0.8	13	0.2	-0.1	0.6	15	0.2	-0.4	0.7	28	0.44841	1
Q91VM5_MOUSE,	0.1	-0.3	0.5	11	0.3	-0.1	0.7	12	-0.2	-0.8	0.4	23	0.45004	1
SNG3_MOUSE,	0.3	-0.3	0.9	4	0	-0.7	0.7	3	0.3	-0.6	1.2	7	0.45051	1
GRHPR_MOUSE,Q3T9Z2_MOUSE,	0.3	-0.1	0.7	11	0.1	-0.4	0.5	11	0.2	-0.4	0.8	22	0.45165	1
Q3UBU0_MOUSE,Q91V38_MOUSE,ENPL_MOUSE,Q3UAD6_MOUSE,	-0.6	-1.2	0	8	-0.9	-1.7	-0.2	4	0.3	-0.6	1.2	12	0.45186	1
Q3UYM8_MOUSE,MYPR_MOUSE,	-0.6	-0.9	-0.3	25	-0.4	-0.7	-0.1	28	-0.1	-0.5	0.3	53	0.45212	1
PNPO_MOUSE,	1	0.3	1.7	3	1.4	0.5	2.5	3	-0.4	-1.7	0.8	6	0.45651	1
HPLN1_MOUSE,	-0.9	-1.4	-0.4	8	-0.7	-1.1	-0.3	12	-0.2	-0.8	0.4	20	0.45706	1
Q497E9_MOUSE,RS8_MOUSE,	-0.8	-1.7	-0.2	4	-1.2	-1.8	-0.6	5	0.4	-0.6	1.3	9	0.45924	1
FKBP4_MOUSE,	0.2	-0.6	1.1	4	-0.1	-0.6	0.4	6	0.3	-0.6	1.3	10	0.46123	1
DCE2_MOUSE,Q548L4_MOUSE,	1.8	1.3	2.1	14	1.6	1.2	2	14	0.2	-0.4	0.7	28	0.46464	1
SAE1_MOUSE,	0.1	-0.6	0.9	3	-0.3	-1.1	0.6	3	0.4	-0.7	1.5	6	0.46487	1
Q5SX53_MOUSE,Q9CTC7_MOUSE,M2OM_MOUSE,	-0.4	-1.1	0.2	6	-0.7	-1.2	-0.2	9	0.3	-0.5	1.1	15	0.46932	1
GSTM5_MOUSE,	-0.3	-0.5	0	38	-0.2	-0.4	0.1	45	-0.1	-0.4	0.2	83	0.47002	1
CBPE_MOUSE,Q543R4_MOUSE,	0.4	-0.7	1.5	2	-0.1	-1.1	0.9	4	0.5	-1	2	6	0.47383	1
Q5SS40_MOUSE,1433E_MOUSE,	0	-0.2	0.2	61	-0.1	-0.3	0.1	68	0.1	-0.2	0.3	129	0.47554	1
IPYR_MOUSE,Q4FK49_MOUSE,	-0.2	-0.7	0.2	10	-0.4	-0.9	0	12	0.2	-0.4	0.8	22	0.476	1
Q3U7F3_MOUSE,Q3TIK8_MOUSE,Q3UK83_MOUSE,Q5EBP8_MOUSE,ROA1_MOUSE,	-0.1	-0.4	0.3	18	0.1	-0.3	0.4	20	-0.2	-0.6	0.3	38	0.47981	1
IVD_MOUSE,A3KGG9_MOUSE,	0.1	-0.3	0.5	13	-0.1	-0.4	0.3	19	0.2	-0.4	0.7	32	0.48033	1
TPM3_MOUSE,	0.2	-0.1	0.4	36	0.3	0	0.5	40	-0.1	-0.5	0.2	76	0.48271	1
AIDA_MOUSE,	1	0.3	1.7	3	0.7	0.1	1.3	5	0.3	-0.6	1.2	8	0.4847	1
ATPO_MOUSE,	-0.6	-1.2	-0.1	6	-0.4	-0.8	-0.1	16	-0.2	-0.9	0.4	22	0.48495	1
PP1G_MOUSE,Q3U7K1_MOUSE,Q6ZWM8_MOUSE,	-0.3	-0.6	0	27	-0.4	-0.7	-0.1	35	0.1	-0.3	0.5	62	0.48512	1
A2AFL4_MOUSE,LYAG_MOUSE,	2	1.6	2.4	10	1.8	1.3	2.3	10	0.2	-0.4	0.8	20	0.48542	1
Q3U041_MOUSE,Q3UQN3_MOUSE,Q3TUA4_MOUSE,Q3TJ52_MOUSE,RD23B_MOUSE,	0.7	-0.1	1.5	7	0.4	-0.2	1	8	0.3	-0.7	1.3	15	0.48656	1
ACADS_MOUSE,Q91W85_MOUSE,	0.1	-0.7	1	4	-0.3	-1.2	0.6	6	0.4	-0.8	1.6	10	0.48744	1
NT5D3_MOUSE,	-1.3	-2.2	-0.6	5	-1.1	-1.5	-0.6	13	-0.3	-1.2	0.6	18	0.48826	1
OXR1_MOUSE,	-1	-1.8	-0.2	4	-1.3	-2	-0.6	4	0.3	-0.7	1.4	8	0.49032	1
B2RXT3_MOUSE,	-0.6	-0.9	-0.3	34	-0.7	-1	-0.4	39	0.1	-0.2	0.5	73	0.49045	1
RAB2A_MOUSE,Q0PD65_MOUSE,	0.4	-0.1	1	9	0.2	-0.3	0.7	10	0.2	-0.5	0.9	19	0.49187	1
PGP_MOUSE,	-0.3	-0.8	0.1	11	-0.1	-0.7	0.4	7	-0.2	-0.9	0.5	18	0.49463	1
PURA_MOUSE,	0.3	-0.4	1.1	4	0	-0.7	0.7	4	0.3	-0.7	1.3	8	0.49901	1
GHC1_MOUSE,	-0.8	-1.4	-0.3	5	-1.1	-1.6	-0.5	6	0.2	-0.5	1	11	0.50151	1
ODO2_MOUSE,	-0.5	-0.9	-0.1	10	-0.3	-0.8	0.1	12	-0.2	-0.8	0.4	22	0.50272	1
CMBL_MOUSE,	2	1.4	2.4	7	2.5	1.2	3.3	4	-0.4	-1.5	0.8	11	0.5054	1
Q4FJX9_MOUSE,SODM_MOUSE,	0.4	0.1	0.7	22	0.2	0	0.5	29	0.1	-0.3	0.5	51	0.50586	1
Q8R5L1_MOUSE,	0.2	-0.3	0.7	7	0	-0.5	0.5	9	0.2	-0.5	0.9	16	0.50772	1
STIP1_MOUSE,Q3THQ5_MOUSE,	0.2	-0.1	0.4	41	0.3	0	0.5	47	-0.1	-0.4	0.2	88	0.50821	1
RL15_MOUSE,Q3U7D2_MOUSE,Q5M8Q0_MOUSE,	-1.1	-1.7	-0.5	4	-1.4	-1.9	-0.8	5	0.3	-0.5	1.1	9	0.5093	1
TCEA1_MOUSE,Q3UWX7_MOUSE,	0.2	-0.5	0.9	5	0.5	-0.1	1.1	6	-0.3	-1.2	0.6	11	0.50992	1
Q7TMG8_MOUSE,NIPS2_MOUSE,Q3TD78_MOUSE,	0.2	-0.1	0.5	21	0	-0.3	0.4	17	0.1	-0.3	0.6	38	0.51064	1
DHPR_MOUSE,	0.2	-0.1	0.4	36	0.3	0	0.5	41	-0.1	-0.4	0.2	77	0.51115	1
Q8C1Y3_MOUSE,H10_MOUSE,Q3U4Y0_MOUSE,	-0.2	-0.5	0.1	26	-0.1	-0.4	0.2	25	-0.1	-0.5	0.3	51	0.51227	1
Q3T1F6_MOUSE,Q3ZB61_MOUSE,MAG_MOUSE,Q3ZB60_MOUSE,Q3ZB62_MOUSE,	-0.1	-0.9	0.7	3	0.3	-0.5	1.1	3	-0.4	-1.5	0.8	6	0.51294	1
Q3USR5_MOUSE,FBX2_MOUSE,B2KFV9_MOUSE,	0	-0.6	0.6	6	0.2	-0.4	0.9	5	-0.3	-1.1	0.6	11	0.51611	1
PSA6_MOUSE,	0.5	0.2	0.7	34	0.4	0.1	0.6	32	0.1	-0.3	0.5	66	0.52175	1
Q3UJS0_MOUSE,RL8_MOUSE,	-0.6	-1.1	-0.1	10	-0.8	-1.3	-0.3	8	0.2	-0.5	0.9	18	0.52419	1
F10A1_MOUSE,Q3U8D2_MOUSE,Q3U9V1_MOUSE,	-0.1	-0.8	0.6	6	0.1	-0.4	0.6	9	-0.3	-1.1	0.6	15	0.52428	1
FUBP2_MOUSE,	-0.4	-0.9	0.1	8	-0.2	-0.7	0.3	10	-0.2	-0.9	0.5	18	0.52429	1
NPS3A_MOUSE,B1AWZ4_MOUSE,	0.6	0	1.2	8	0.8	0.3	1.3	10	-0.2	-1	0.5	18	0.52459	1
MDHC_MOUSE,	0.1	-0.1	0.3	60	0	-0.2	0.2	65	0.1	-0.2	0.3	125	0.52464	1
SNG1_MOUSE,Q3U6D7_MOUSE,	0	-0.8	0.8	2	-0.3	-0.9	0.4	4	0.3	-0.7	1.3	6	0.52502	1
Q543S2_MOUSE,GNAO_MOUSE,	0.4	0.1	0.7	25	0.3	0	0.6	26	0.1	-0.3	0.5	51	0.52767	1
Q3UN66_MOUSE,KPCG_MOUSE,	-1.1	-1.9	-0.3	4	-1.4	-2.3	-0.6	3	0.4	-0.8	1.5	7	0.52787	1
CDC42_MOUSE,	-0.1	-1	0.9	2	-0.4	-1	0.2	5	0.4	-0.8	1.5	7	0.52894	1
Q3TA80_MOUSE,CNDP2_MOUSE,	0.3	-0.1	0.7	19	0.2	-0.2	0.5	22	0.2	-0.3	0.7	41	0.52975	1
LXN_MOUSE,Q14BZ3_MOUSE,	-0.6	-1.5	0.4	2	-1	-2	0	2	0.4	-0.9	1.8	4	0.5301	1
Q7JD03_MOUSE,A3E4B0_MOUSE,Q5GA81_MUSMM,A3R481_MOUSE,A3R455_MUSMC,Q7JCZ1_MOUSE,COX2_MOUSE,	-0.6	-1.3	0.1	5	-0.9	-1.3	-0.4	10	0.2	-0.6	1	15	0.53191	1
Q3UK27_MOUSE,ULA1_MOUSE,	-0.5	-1.2	0.3	5	-0.2	-0.8	0.4	6	-0.3	-1.2	0.7	11	0.53296	1
HIBCH_MOUSE,	0.1	-0.6	0.7	5	-0.2	-0.7	0.4	10	0.2	-0.6	1.1	15	0.53374	1
Q543B9_MOUSE,Q3TCS0_MOUSE,PPCE_MOUSE,	0.1	-0.3	0.4	21	0.2	-0.1	0.5	25	-0.1	-0.6	0.3	46	0.53566	1
Q99KF5_MOUSE,B1B0W8_MOUSE,HPRT_MOUSE,	0.7	0.4	1.1	18	0.6	0.3	0.9	21	0.1	-0.3	0.6	39	0.5358	1
GLO2_MOUSE,	0	-0.3	0.4	17	-0.1	-0.4	0.2	22	0.1	-0.3	0.6	39	0.53877	1
HNRPD_MOUSE,	0	-0.3	0.3	21	0.1	-0.2	0.5	19	-0.1	-0.5	0.3	40	0.54514	1
PPR1B_MOUSE,	2.6	2.2	3.1	11	2.4	1.8	3	8	0.2	-0.5	0.9	19	0.55064	1
ADDB_MOUSE,Q8C0Y2_MOUSE,	-0.7	-1	-0.4	25	-0.6	-0.9	-0.2	22	-0.1	-0.6	0.3	47	0.55403	1
HEBP1_MOUSE,	-0.4	-0.9	0.1	9	-0.2	-0.6	0.1	13	-0.2	-0.7	0.4	22	0.5547	1
AIBP_MOUSE,	0.4	0	0.8	13	0.2	-0.1	0.6	15	0.1	-0.4	0.6	28	0.55597	1
Q58E70_MOUSE,	0.1	-0.1	0.4	47	0.2	0	0.4	56	-0.1	-0.4	0.2	103	0.55638	1
Q545S0_MOUSE,THTR_MOUSE,	-1.4	-1.9	-0.9	9	-1.6	-2.1	-1	7	0.2	-0.5	0.9	16	0.55706	1
UGPA_MOUSE,Q8R0M2_MOUSE,Q3U548_MOUSE,	-0.5	-1.5	0.5	3	-0.9	-1.7	0	4	0.4	-0.9	1.7	7	0.5572	1
A2AWH6_MOUSE,ODPX_MOUSE,	-0.5	-1.4	0.3	3	-0.9	-1.6	-0.1	4	0.3	-0.8	1.4	7	0.55872	1
Q14BH8_MOUSE,	1.6	1.3	2	20	1.8	1.4	2.1	18	-0.1	-0.6	0.3	38	0.55892	1
1433F_MOUSE,	-0.3	-0.6	-0.1	43	-0.4	-0.7	-0.2	40	0.1	-0.2	0.4	83	0.56006	1
PURB_MOUSE,	-0.3	-1	0.5	4	-0.6	-1.3	0.2	4	0.3	-0.7	1.3	8	0.56297	1
GCSP_MOUSE,	-1.1	-1.8	-0.4	4	-1.5	-2.5	-0.4	3	0.3	-0.9	1.6	7	0.5636	1
PSB1_MOUSE,Q6RI64_MOUSE,	0.5	0.2	0.8	32	0.4	0.1	0.6	31	0.1	-0.3	0.5	63	0.56386	1
A2AEW9_MOUSE,A2AEW8_MOUSE,	-0.2	-1.1	0.7	4	0.1	-0.7	1	3	-0.3	-1.6	0.9	7	0.56451	1
Q8R436_MOUSE,GSHB_MOUSE,Q541E2_MOUSE,Q3TWM2_MOUSE,	-0.4	-1	0.1	8	-0.1	-1.1	1	2	-0.3	-1.5	0.8	10	0.56819	1
PREP_MOUSE,	0.1	-0.6	0.7	6	-0.3	-1.2	0.7	4	0.3	-0.8	1.5	10	0.57008	1
C1QB_MOUSE,Q3U6I5_MOUSE,Q3U793_MOUSE,	-0.1	-0.8	0.6	3	-0.3	-0.9	0.3	5	0.3	-0.7	1.2	8	0.57411	1
PHB2_MOUSE,Q3V235_MOUSE,	-0.1	-0.7	0.6	6	-0.3	-1.1	0.4	4	0.3	-0.7	1.2	10	0.57473	1
Q544Z7_MOUSE,APEX1_MOUSE,	0.2	-0.2	0.7	11	0.1	-0.3	0.5	14	0.1	-0.4	0.7	25	0.57533	1
Q7TSZ0_MOUSE,	-0.4	-0.7	-0.1	30	-0.5	-0.8	-0.2	27	0.1	-0.3	0.5	57	0.57538	1
CY1_MOUSE,	-0.6	-1.2	0.1	5	-0.8	-1.5	-0.2	5	0.2	-0.7	1.2	10	0.57724	1
VDAC1_MOUSE,Q3U6K8_MOUSE,	0.4	-0.2	0.9	8	0.2	-0.4	0.7	6	0.2	-0.6	1	14	0.57895	1
MARE1_MOUSE,Q3U4H0_MOUSE,	0.1	-0.6	0.8	5	0.4	-0.3	1.1	6	-0.3	-1.2	0.7	11	0.58061	1
RAB14_MOUSE,Q50HX2_MOUSE,Q50HX4_MOUSE,	0.7	0.2	1.1	16	0.8	0.4	1.3	21	-0.2	-0.8	0.5	37	0.58138	1
PCCA_MOUSE,Q3UGC8_MOUSE,	-0.1	-0.5	0.2	21	0	-0.4	0.3	19	-0.1	-0.6	0.3	40	0.58465	1
ACS2L_MOUSE,Q3TZ45_MOUSE,Q69Z91_MOUSE,Q569W4_MOUSE,	-0.1	-1.2	0.8	5	0.2	-0.7	1	3	-0.3	-1.7	0.9	8	0.58719	1
Q921K3_MOUSE,Q9DBP1_MOUSE,Q3UJV5_MOUSE,Q3TWW8_MOUSE,	0.4	-0.2	1	6	0.1	-0.7	1	3	0.3	-0.8	1.3	9	0.58734	1
Q9DAY9_MOUSE,Q5BL09_MOUSE,Q5SQB5_MOUSE,Q5SQB0_MOUSE,NPM_MOUSE,Q5SQB7_MOUSE,Q5U438_MOUSE,	0.7	0.3	1.1	12	0.9	0.4	1.3	9	-0.2	-0.8	0.5	21	0.58755	1
Q5SW83_MOUSE,ARP2_MOUSE,	-1.1	-1.3	-0.8	26	-1.2	-1.4	-0.9	28	0.1	-0.3	0.5	54	0.58823	1
PA1B2_MOUSE,	-0.2	-0.8	0.4	6	-0.4	-0.9	0.2	8	0.2	-0.6	1	14	0.59127	1
Q3V1Y3_MOUSE,CACP_MOUSE,	0.4	-0.1	0.9	10	0.6	0.1	1.1	8	-0.2	-0.8	0.5	18	0.59212	1
B7ZC71_MOUSE,B7ZC72_MOUSE,CA123_MOUSE,A2A8E2_MOUSE,A2A8E1_MOUSE,	0.5	-0.3	1.3	3	0.2	-0.5	0.9	5	0.3	-0.8	1.3	8	0.59253	1
IDHP_MOUSE,	0	-0.4	0.3	19	-0.1	-0.4	0.2	28	0.1	-0.3	0.5	47	0.59525	1
PPIA_MOUSE,Q3TE63_MOUSE,Q5SVY2_MOUSE,Q3UAJ1_MOUSE,	0.5	-0.1	1.2	9	0.3	-0.1	0.7	14	0.2	-0.5	1	23	0.59535	1
PTPA_MOUSE,Q543N6_MOUSE,A2AWE9_MOUSE,	-0.2	-1.2	0.7	3	-0.6	-1.8	0.6	2	0.4	-1.1	1.9	5	0.59726	1
SYPH_MOUSE,B1AVA7_MOUSE,A4FUR8_MOUSE,	-0.1	-0.7	0.6	4	-0.4	-1.5	0.7	2	0.3	-0.9	1.6	6	0.59812	1
ECHM_MOUSE,	-3.6	-4.1	-3	5	-3.8	-4.4	-3.1	4	0.2	-0.6	1.1	9	0.60109	1
Q3TXK9_MOUSE,Q3UB84_MOUSE,Q3UAS7_MOUSE,Q3U9R7_MOUSE,GSHR_MOUSE,	0.7	0.1	1.4	6	0.6	0	1.1	9	0.2	-0.6	1	15	0.60138	1
HNRPC_MOUSE,Q3U6P5_MOUSE,	-0.4	-0.7	0	14	-0.2	-0.7	0.3	8	-0.2	-0.8	0.5	22	0.60172	1
B7ZNJ3_MOUSE,CSKI1_MOUSE,	0	-0.7	0.7	5	0.2	-0.4	0.9	8	-0.2	-1.2	0.7	13	0.6022	1
Q80XR3_MOUSE,QOR_MOUSE,	1.2	0.7	1.6	11	1	0.7	1.4	17	0.1	-0.4	0.7	28	0.60248	1
CHM4B_MOUSE,	0.6	-0.2	1.4	4	0.9	0	1.9	2	-0.3	-1.5	0.9	6	0.60252	1
MTAP_MOUSE,A2ANM4_MOUSE,	0.6	0	1.3	6	0.4	-0.2	1	7	0.2	-0.6	1.1	13	0.60256	1
QCR2_MOUSE,	-0.7	-1.2	-0.3	11	-0.9	-1.4	-0.4	12	0.2	-0.5	0.9	23	0.60406	1
CALR_MOUSE,Q3UWP8_MOUSE,B2MWM9_MOUSE,	-0.2	-0.5	0.2	18	-0.1	-0.4	0.2	24	-0.1	-0.5	0.3	42	0.60504	1
ANM5_MOUSE,	0.6	-0.3	1.4	4	0.3	-0.5	1.1	5	0.3	-0.9	1.4	9	0.60993	1
DDB1_MOUSE,	0.5	0.1	0.9	21	0.6	0.2	1	16	-0.1	-0.6	0.4	37	0.61165	1
H15_MOUSE,Q1WWK3_MOUSE,Q5T003_MOUSE,	-0.1	-0.7	0.6	11	-0.3	-1	0.4	6	0.2	-0.7	1.2	17	0.61398	1
Q5SZ98_MOUSE,H11_MOUSE,	0.2	-0.1	0.6	18	0.3	0	0.7	23	-0.1	-0.6	0.4	41	0.6162	1
Q5BL10_MOUSE,	-0.2	-0.7	0.3	9	-0.4	-1.3	0.3	5	0.2	-0.7	1.2	14	0.617	1
PSA5_MOUSE,Q3TUX3_MOUSE,Q3TUI9_MOUSE,Q3UPK6_MOUSE,	0.5	0.1	0.9	12	0.3	-0.1	0.7	10	0.1	-0.4	0.7	22	0.61978	1
RAB1B_MOUSE,Q0PD66_MOUSE,Q3V3C2_MOUSE,	0.4	-0.1	1	7	0.6	0.2	1	9	-0.2	-0.8	0.5	16	0.6204	1
FUS_MOUSE,Q8CFQ9_MOUSE,Q3USY4_MOUSE,Q564D0_MOUSE,	0	-0.4	0.4	12	0.1	-0.2	0.5	14	-0.1	-0.6	0.4	26	0.62126	1
HNRPQ_MOUSE,	-0.8	-1.6	-0.1	4	-0.6	-1.4	0.3	2	-0.3	-1.4	0.8	6	0.6218	1
Q3UW66_MOUSE,THTM_MOUSE,Q505N7_MOUSE,	-0.1	-0.5	0.3	17	0	-0.3	0.3	21	-0.1	-0.6	0.4	38	0.62308	1
SYIM_MOUSE,	-0.8	-1.7	0.2	4	-1.1	-2	-0.2	3	0.3	-0.9	1.6	7	0.62408	1
DBNL_MOUSE,	-0.2	-0.7	0.3	10	0	-0.5	0.4	10	-0.2	-0.8	0.5	20	0.62695	1
B1AWX7_MOUSE,AL1B1_MOUSE,	-0.2	-0.7	0.4	8	-0.4	-1	0.2	7	0.2	-0.6	1	15	0.62731	1
Q6NXW4_MOUSE,Q3TT79_MOUSE,PDIA4_MOUSE,Q3UJW0_MOUSE,	-0.4	-1.2	0.3	4	-0.2	-0.8	0.3	11	-0.2	-1.1	0.7	15	0.62911	1
NUCL_MOUSE,Q3TGR3_MOUSE,Q8CD23_MOUSE,Q3TL52_MOUSE,	0.2	-0.1	0.6	21	0.3	0	0.6	22	-0.1	-0.5	0.3	43	0.62985	1
Q3TIC8_MOUSE,Q3TV75_MOUSE,QCR1_MOUSE,	-0.8	-1.3	-0.3	6	-1	-1.7	-0.3	5	0.2	-0.6	1	11	0.63337	1
HNRDL_MOUSE,	-0.2	-0.9	0.5	5	0	-0.6	0.6	7	-0.2	-1.1	0.7	12	0.63659	1
RAB10_MOUSE,Q4FJL0_MOUSE,	0.1	-0.7	0.9	3	-0.1	-0.7	0.4	5	0.2	-0.7	1.2	8	0.63739	1
SCRN3_MOUSE,	-0.3	-0.9	0.4	6	-0.1	-0.7	0.5	6	-0.2	-1	0.7	12	0.63756	1
ERP29_MOUSE,	0.4	-0.2	1.1	6	0.6	0.1	1	11	-0.2	-0.9	0.6	17	0.63947	1
Q9CX86_MOUSE,	0.2	-0.4	0.7	7	0	-0.6	0.6	6	0.2	-0.6	0.9	13	0.63976	1
NAGK_MOUSE,Q9D997_MOUSE,Q3U2G9_MOUSE,	1.1	0.5	1.7	7	0.9	0.2	1.6	4	0.2	-0.7	1.1	11	0.64445	1
FRIH_MOUSE,	1.1	0.6	1.5	8	0.9	0.5	1.3	9	0.1	-0.5	0.8	17	0.64625	1
RAN_MOUSE,Q3ULW0_MOUSE,	-0.7	-1.1	-0.3	13	-0.9	-1.3	-0.4	10	0.1	-0.4	0.7	23	0.64656	1
SPB6_MOUSE,Q3U3L3_MOUSE,Q4FJQ6_MOUSE,	0.1	-0.6	0.8	4	0.3	-0.4	1	7	-0.2	-1.2	0.8	11	0.647	1
GLOD4_MOUSE,	0.1	-0.4	0.5	13	-0.1	-0.5	0.4	14	0.1	-0.4	0.7	27	0.64732	1
SYG_MOUSE,	0	-0.4	0.4	16	-0.1	-0.4	0.3	22	0.1	-0.4	0.6	38	0.64783	1
Q9D927_MOUSE,	0.1	-1	1.2	2	-0.2	-1	0.7	2	0.3	-1.1	1.7	4	0.64807	1
CPSF5_MOUSE,	-0.1	-0.7	0.6	6	0.1	-0.5	0.8	6	-0.2	-1.1	0.7	12	0.64979	1
Q3UF58_MOUSE,Q542K4_MOUSE,Q3TVZ1_MOUSE,CATA_MOUSE,Q3TXQ6_MOUSE,Q3UZE7_MOUSE,Q8C6E3_MOUSE,	0.3	-0.6	1.2	3	0.5	-0.1	1.1	8	-0.2	-1.3	0.8	11	0.65122	1
PP1R7_MOUSE,	-0.8	-1.6	0	4	-1	-1.8	-0.2	3	0.2	-0.8	1.3	7	0.65335	1
HNRL2_MOUSE,	-0.1	-0.9	0.7	5	0.1	-0.5	0.7	6	-0.2	-1.2	0.8	11	0.65365	1
Q69ZX9_MOUSE,	-0.6	-1.1	-0.1	11	-0.8	-1.2	-0.3	9	0.1	-0.5	0.8	20	0.65727	1
Q14C38_MOUSE,TCAL5_MOUSE,	0.2	-0.5	1	3	0.4	-0.2	1.1	4	-0.2	-1.1	0.7	7	0.65762	1
PSD3_MOUSE,Q8C0E9_MOUSE,	-0.9	-1.7	0	2	-1.1	-1.7	-0.5	5	0.2	-0.8	1.3	7	0.65975	1
HPCL4_MOUSE,B2RRY8_MOUSE,	0.6	-0.2	1.4	3	0.8	0	1.6	3	-0.2	-1.3	0.9	6	0.66504	1
CAPR1_MOUSE,Q3UFZ6_MOUSE,	0.4	-0.3	1.2	4	0.7	0	1.3	6	-0.2	-1.2	0.8	10	0.66622	1
Q3TWS4_MOUSE,AP180_MOUSE,Q3UI39_MOUSE,	0	-0.5	0.5	7	-0.1	-0.7	0.4	8	0.2	-0.6	0.9	15	0.66761	1
Q8CAJ7_MOUSE,Q3TVK3_MOUSE,Q56A00_MOUSE,DNPEP_MOUSE,Q3U3I6_MOUSE,	0.5	-0.1	1.1	6	0.4	-0.3	1	6	0.2	-0.7	1	12	0.66764	1
PHB_MOUSE,	-0.3	-0.9	0.4	5	-0.5	-1.4	0.4	3	0.2	-0.9	1.3	8	0.66959	1
TOM34_MOUSE,	0.3	-0.2	0.7	15	0.1	-0.3	0.6	13	0.1	-0.5	0.7	28	0.66998	1
MAON_MOUSE,Q499F4_MOUSE,	0	-0.4	0.4	11	-0.1	-0.5	0.2	20	0.1	-0.4	0.6	31	0.67174	1
PUR9_MOUSE,	0.5	0.1	0.8	21	0.5	0.3	0.8	28	-0.1	-0.5	0.3	49	0.67323	1
Q3UHH0_MOUSE,AT2B2_MOUSE,Q3UHJ3_MOUSE,	-1.2	-1.8	-0.6	5	-1.5	-2.4	-0.5	2	0.2	-0.9	1.4	7	0.67429	1
Q3TQP7_MOUSE,THIL_MOUSE,	0	-0.2	0.3	51	0	-0.2	0.2	52	0.1	-0.2	0.4	103	0.67475	1
Q5BKR9_MOUSE,STRN_MOUSE,	-0.3	-1	0.4	6	-0.1	-0.8	0.6	5	-0.2	-1.2	0.8	11	0.67742	1
GMPR1_MOUSE,	-0.6	-1.1	0	7	-0.7	-1.2	-0.2	9	0.1	-0.5	0.8	16	0.67762	1
PSMD9_MOUSE,	0.6	-0.2	1.4	4	0.8	0.2	1.4	6	-0.2	-1.1	0.8	10	0.68	1
Q3TTX0_MOUSE,Q6ZQ61_MOUSE,MATR3_MOUSE,Q5BL18_MOUSE,Q4FJT0_MOUSE,	-0.2	-1.1	0.7	4	-0.4	-1.3	0.4	3	0.2	-1	1.4	7	0.68014	1
ESTD_MOUSE,	0.5	0.1	0.9	16	0.4	0.1	0.8	18	0.1	-0.4	0.6	34	0.68154	1
Q3TMZ8_MOUSE,ROAA_MOUSE,Q544Z3_MOUSE,Q80XR6_MOUSE,Q20BD0_MOUSE,Q9D6G1_MOUSE,	0.2	-0.3	0.7	9	0.3	-0.2	0.8	8	-0.1	-0.8	0.6	17	0.682	1
NFM_MOUSE,	0.5	0	1	11	0.4	0	0.8	14	0.1	-0.5	0.7	25	0.68259	1
ODPB_MOUSE,	0.1	-0.2	0.3	41	0.1	-0.1	0.3	63	-0.1	-0.4	0.2	104	0.68354	1
AL1A1_MOUSE,	-3	-3.8	-2.4	6	-2.9	-3.5	-2.2	6	-0.2	-1.2	0.7	12	0.68697	1
LRP1_MOUSE,	0.1	-0.7	0.9	6	0.3	-0.3	0.9	10	-0.2	-1.2	0.8	16	0.68874	1
ARP3B_MOUSE,	-1.4	-1.8	-1	10	-1.3	-1.7	-0.9	12	-0.1	-0.7	0.5	22	0.68904	1
ODP2_MOUSE,	-0.2	-0.8	0.5	5	0.1	-0.9	1	3	-0.2	-1.3	0.9	8	0.69032	1
ASGL1_MOUSE,	-0.1	-0.6	0.4	9	-0.2	-0.8	0.4	7	0.1	-0.6	0.9	16	0.69291	1
FAHD2_MOUSE,	0.4	-0.1	0.9	9	0.5	0.1	0.9	13	-0.1	-0.7	0.5	22	0.69499	1
EF1D_MOUSE,Q80T06_MOUSE,	-0.1	-0.8	0.6	4	0.1	-0.9	1.2	2	-0.2	-1.5	1	6	0.69851	1
MECP2_MOUSE,	0.4	-0.1	0.8	11	0.5	0	1	11	-0.1	-0.8	0.6	22	0.69884	1
CLYBL_MOUSE,	-0.4	-1.2	0.4	4	-0.7	-1.7	0.4	2	0.2	-1	1.5	6	0.70018	1
Q3V2G5_MOUSE,PTGDS_MOUSE,	-0.6	-1.1	0	7	-0.8	-1.7	0.1	4	0.2	-0.8	1.2	11	0.70074	1
3HIDH_MOUSE,	1.1	0.7	1.5	14	1.2	0.9	1.5	21	-0.1	-0.6	0.4	35	0.70118	1
Q58EV4_MOUSE,Q9DCD8_MOUSE,PSA3_MOUSE,	0.4	0	0.7	17	0.3	-0.1	0.6	15	0.1	-0.4	0.6	32	0.70175	1
Q545Q8_MOUSE,PMM1_MOUSE,	0.6	-0.4	1.6	2	0.8	0	1.6	3	-0.2	-1.4	1	5	0.70179	1
Q3TI61_MOUSE,Q3TIP0_MOUSE,Q3TKV1_MOUSE,Q3TW71_MOUSE,Q3TXV1_MOUSE,Q3TWL6_MOUSE,PSMD2_MOUSE,	0	-0.5	0.6	9	-0.1	-0.6	0.4	8	0.1	-0.6	0.9	17	0.70208	1
RB11A_MOUSE,Q0PD45_MOUSE,RB11B_MOUSE,Q78ZJ8_MOUSE,	-0.2	-0.8	0.5	7	0	-0.6	0.6	6	-0.2	-1	0.7	13	0.70354	1
A2AA77_MOUSE,DHSB_MOUSE,Q0QEZ4_MOUSE,	0	-0.4	0.5	13	0.2	-0.4	0.6	9	-0.1	-0.7	0.5	22	0.70706	1
PSB3_MOUSE,Q545G0_MOUSE,	0.3	-0.1	0.7	14	0.3	-0.1	0.6	20	0.1	-0.4	0.6	34	0.70831	1
A2APW8_MOUSE,SNAB_MOUSE,	-0.3	-0.6	-0.1	41	-0.3	-0.5	0	44	-0.1	-0.4	0.3	85	0.70982	1
NIF3L_MOUSE,Q8C608_MOUSE,Q6P1B7_MOUSE,	0.3	-0.3	0.9	8	0.5	-0.1	1	7	-0.2	-1	0.6	15	0.71017	1
TPM4_MOUSE,	0	-0.9	0.9	2	0.2	-0.6	0.9	4	-0.2	-1.3	0.9	6	0.71363	1
Q3UBN8_MOUSE,	0.2	-0.7	1.1	5	0	-1.2	1.1	2	0.3	-1.2	1.7	7	0.71723	1
PRDX2_MOUSE,	-0.4	-0.7	0	18	-0.4	-0.8	-0.1	23	0.1	-0.4	0.5	41	0.71788	1
NUDT3_MOUSE,	0	-1.1	1.1	2	-0.3	-1.2	0.6	2	0.3	-1.2	1.7	4	0.71965	1
Q0PD38_MOUSE,RAB18_MOUSE,	-0.2	-1.1	0.7	3	-0.4	-1.1	0.3	4	0.2	-0.9	1.3	7	0.72047	1
RSSA_MOUSE,B2CY77_MOUSE,	-0.6	-1.1	-0.1	7	-0.5	-1	0.1	7	-0.1	-0.8	0.6	14	0.72072	1
A1BN54_MOUSE,	-0.3	-0.7	0.1	18	-0.4	-0.8	0	16	0.1	-0.4	0.6	34	0.72177	1
[truncated: 303 more rows]

## Sheet: CA1-cytosolic fract.
Group	14N shocked/ 15N reference				14N control/15N reference				14N shocked/14N control
[truncated: 664 more rows]

[truncated: 67 more sheets: CA1-membrane-associated fract., ACC-cytosolic fract., ACC-membrane-associated fract., NAc-cytosolic fract., NAc-membrane-associated fract., PrL_NSV_cyto_proteins, PrL_NSV_cyto_peptides, PrL_NSV_mem_proteins, PrL_NSV_mem_peptides, PrL_SV_cyto_proteins, PrL_SV_cyto_peptides, PrL_SV_mem_proteins, PrL_SV_mem_peptides, PrL_SF_cyto_proteins, PrL_SF_cyto_peptides, PrL_SF_mem_proteins, PrL_SF_mem_peptides, BLA_NSV_cyto_proteins, BLA_NSV_cyto_peptides, BLA_NSV_mem_proteins …]
