# Supplementary material
Source: publisher figshare collection journal article supplement (https://karger.figshare.com/articles/dataset/_/4004913)
Supplement: Supplementary file 1 [file 1 › suppl.table.3.MNP_201511004_1_11.xlsx]

## Sheet: tab.normalized_data
Supplemental Table S3. Normalized abundance of measured metabolites
HMDBa ID	BLA	BLA	BLA	BLA	BLA	BLA	BLA	BLA	BLA	BLA	CeA	CeA	CeA	CeA	CeA	CeA	CeA	CeA	CeA	CeA	CA1	CA1	CA1	CA1	CA1	CA1	CA1	CA1	CA1	CA1	PrL	PrL	PrL	PrL	PrL	PrL	PrL	PrL	PrL	PrL	NAc	NAc	NAc	NAc	NAc	NAc	NAc	NAc	NAc
	Non-shocked	Non-shocked	Non-shocked	Non-shocked	Non-shocked	Shocked	Shocked	Shocked	Shocked	Shocked	Non-shocked	Non-shocked	Non-shocked	Non-shocked	Non-shocked	Shocked	Shocked	Shocked	Shocked	Shocked	Non-shocked	Non-shocked	Non-shocked	Non-shocked	Non-shocked	Shocked	Shocked	Shocked	Shocked	Shocked	Non-shocked	Non-shocked	Non-shocked	Non-shocked	Non-shocked	Shocked	Shocked	Shocked	Shocked	Shocked	Non-shocked	Non-shocked	Non-shocked	Non-shocked	Non-shocked	Shocked	Shocked	Shocked	Shocked
HMDB00001	31803.5	63607	61695.7	47348.4	38195	24197.5	83484.6	76123.8	68495.4	43974.6	50379.6	43966.6	55914.5	35663.1	33941.4	40517.1	30412.4	39307.8	45209.3	80909.6	67247.2	45397.9	50732.3	50868.4	26681.2	40285.1	26524.1	48935.9	55220.2	86678.6	138654	167551	65964.4	176308	197046	138709	116717	143600	170215	170068	89537.1	164073	144055	145595	109151	88174.7	114033	173154	70979.2
HMDB00005	76272.6	48692.1	57737	40661.9	71158.1	53982.1	54409.4	65381.5	91482.9	66474.8	43214.3	83645.9	41269.1	27207	65817.9	51493.4	30060.6	31880.9	51448.5	42833.7	90063.7	49259.8	58225.5	37450.8	63877.8	45938	35508.3	62440.9	43588.2	48109.4	62242.7	78953.5	57899.1	72261.2	62025.4	52929.7	59469	64027.1	66531.8	39850.3	60439.5	74111.8	66296.7	52566.3	59502.2	54168.3	72310.5	83898.7	53864.5
HMDB00017	50514.1	41076	22168.4	40243.6	34000.9	79938.9	55676.4	58545.1	48051.7	88721.1	34436.8	72804.7	29082.9	16116.3	26602.8	11430.2	24545.1	39607.6	36376.5	42316.6	53742.2	21724.2	13711.4	7284.76	46315.1	38570.3	23206.3	27243.7	28356.5	43419	1814.42	1083.42	3406.67	4937.55	5330.44	3226.03	5661.66	7438.61	1530.72	6850.39	2602.26	3459.99	8671.74	2245.59	2696.28	1448.88	3206.73	3752.72	2597.64
HMDB00019	1.79622e+06	1.67751e+06	1.44148e+06	1.69491e+06	1.77398e+06	2.05085e+06	1.80597e+06	1.61221e+06	1.98947e+06	1.828e+06	1.78845e+06	1.85089e+06	1.43031e+06	1.61443e+06	1.56614e+06	1.68892e+06	1.49446e+06	1.49136e+06	1.68951e+06	1.66801e+06	1.62809e+06	1.73479e+06	2.04647e+06	1.73236e+06	1.43365e+06	1.63389e+06	1.94345e+06	1.71231e+06	1.58368e+06	1.52099e+06	1.36988e+06	1.29503e+06	1.29217e+06	1.32797e+06	1.48017e+06	1.30734e+06	1.35269e+06	1.28701e+06	1.25956e+06	1.194e+06	1.12633e+06	1.16241e+06	1.15071e+06	1.23123e+06	1.15571e+06	1.20674e+06	1.24517e+06	1.20241e+06	1.20238e+06
HMDB00030	NAb	NA	NA	NA	9611.19	49802.9	23154.2	5540.87	29413.4	27599.6	47491.4	37101.5	NA	31804.2	NA	NA	NA	62218.2	35149.1	6548.16	13467.9	NA	NA	NA	2525.23	50481.2	NA	NA	NA	8845.67	103607	72555.6	99694.5	20808.9	47653.8	102439	81590.5	18053.8	41494.1	33895.9	142433	65911.4	21302.4	34780.6	25205.1	117968	109740	79447.6	19675.5
HMDB00034	340405	396706	367770	435985	393236	487353	258801	401710	330127	35423.1	312467	335242	498869	480883	605278	381411	388130	390165	390762	407204	481294	605583	420979	582289	623639	517570	392454	534205	495900	554369	637718	566275	621030	538240	556602	801110	488829	577210	464317	574977	407263	422160	499770	502120	522266	484925	522676	521396	515597
HMDB00043	2.0381e+07	1.31471e+07	1.1713e+07	1.4164e+07	1.19953e+07	1.21225e+07	1.33452e+07	1.226e+07	1.34563e+07	1.41449e+07	1.5298e+07	1.49547e+07	1.23123e+07	1.09064e+07	1.09555e+07	1.41044e+07	1.30565e+07	1.42521e+07	1.1138e+07	1.10719e+07	1.2363e+07	1.18197e+07	9.63477e+06	1.0701e+07	1.05958e+07	1.20432e+07	9.08901e+06	1.03374e+07	9.74921e+06	1.07556e+07	6.24204e+06	4.8121e+06	5.9801e+06	6.76112e+06	6.91322e+06	4.84641e+06	5.87959e+06	6.35941e+06	5.38256e+06	4.77958e+06	1.18712e+07	1.24127e+07	1.42687e+07	1.09964e+07	1.10814e+07	1.13149e+07	1.11521e+07	1.0816e+07	1.1334e+07
HMDB00044	1.21157e+07	1.21953e+07	1.34635e+07	1.31279e+07	1.35316e+07	1.26204e+07	1.18412e+07	1.33794e+07	1.31832e+07	1.21986e+07	1.03753e+07	8.62223e+06	1.22134e+07	1.09744e+07	1.23228e+07	9.86522e+06	1.16641e+07	1.17941e+07	1.12415e+07	1.03222e+07	1.50279e+07	1.69104e+07	1.32935e+07	1.46507e+07	1.45785e+07	1.45779e+07	1.32915e+07	1.35397e+07	1.55363e+07	1.53648e+07	3.3331e+06	3.78062e+06	4.06363e+06	3.84004e+06	3.22651e+06	4.34638e+06	4.57867e+06	4.37131e+06	3.50948e+06	3.69054e+06	3.35875e+06	3.50041e+06	3.81671e+06	3.66895e+06	3.4269e+06	3.46518e+06	4.01995e+06	4.18527e+06	3.49086e+06
HMDB00045	1.00868e+07	1.10106e+07	1.13233e+07	1.26466e+07	9.87235e+06	1.10917e+07	1.1542e+07	1.20816e+07	1.05781e+07	1.16528e+07	1.18768e+07	1.29158e+07	1.05165e+07	1.06242e+07	1.00127e+07	1.03139e+07	1.04647e+07	1.11066e+07	1.17466e+07	1.00396e+07	1.0821e+07	9.46377e+06	1.10998e+07	1.01733e+07	9.85205e+06	8.88632e+06	1.10529e+07	9.58209e+06	1.04993e+07	9.57185e+06	2.16733e+07	2.21912e+07	2.26402e+07	2.32441e+07	2.51127e+07	2.10337e+07	2.12515e+07	2.2258e+07	2.15624e+07	2.34682e+07	2.34785e+07	2.36785e+07	1.96619e+07	2.26257e+07	2.04271e+07	2.0472e+07	2.38729e+07	2.0043e+07	2.14481e+07
HMDB00050	6.11445e+06	7.43306e+06	6.61845e+06	9.36086e+06	6.49607e+06	7.03001e+06	6.30223e+06	6.18403e+06	6.72795e+06	7.16991e+06	6.13684e+06	4.42683e+06	1.0327e+07	6.12507e+06	7.91449e+06	7.36788e+06	5.728e+06	6.0271e+06	8.71192e+06	1.0077e+07	9.4337e+06	9.39924e+06	8.11839e+06	1.03251e+07	1.12682e+07	8.86783e+06	7.5937e+06	1.03664e+07	7.89429e+06	1.02985e+07	79949.4	35390.1	99178.2	65779.8	71842.1	25567.6	52154.9	60822.1	59923.7	84167.4	50276	46536.7	31793.7	83720.7	39537	82811.9	62135.7	44386.2	34237.4
HMDB00052	8907.76	4967.38	9009.38	8928.43	5335.86	4803.57	6721.99	5948.33	10177.7	9672.08	13012.6	11013.4	13047.2	18567.7	14962	10673.3	13128.4	9156.35	9368.73	21582.8	8964.51	8782.91	11806.2	11561.5	9978.17	6958.52	14887.9	8394.88	6937.45	8122.52	20421.5	21645.2	25427.8	23937.7	17812	14586.7	21643.4	22988.3	18016	22400.4	15092.8	14469.3	18041.7	23076.3	23223.7	15964.9	17518.1	18088	20247.7
HMDB00058	76768.4	89053.1	85839.1	72041.6	73177.4	86852	69356.1	80391.9	73032.2	97647.9	55057.8	76610.7	113819	72979.2	137224	76079.4	86733.3	79046.2	98006.2	96344	163410	111549	119729	109645	136502	79663.3	111688	126303	130827	118431	1777.02	NA	NA	1599.82	NA	NA	NA	NA	NA	1999.97	NA	1244	NA	NA	1974.88	NA	NA	1480.41	NA
HMDB00060	50533.4	61674.2	71423.4	47220	90139.9	88063.3	62610	73087.7	44427.5	86002	51758.6	52897.2	53458.7	46034.6	74437.9	40639.6	39043.1	53384.5	40576.6	62145.7	43371	39881.2	51419	59651.7	49826.9	50029.7	37306.5	49531.8	72204.5	55613.9	42716	83655.4	58733	82376.9	81416.6	48087.8	101448	49487.1	71836.1	63513.8	70508.3	95206.5	62215.5	62027.5	82904.4	66418.5	70720.9	83121.5	66791
HMDB00062	4.89283e+06	4.47696e+06	5.58183e+06	4.74157e+06	5.25766e+06	17025	6.68248e+06	4.6747e+06	5.90682e+06	5.36125e+06	6.69001e+06	7.28622e+06	7.12057e+06	7.17368e+06	7.16096e+06	7.44523e+06	6.94782e+06	5.66321e+06	6.72625e+06	7.02331e+06	4.85495e+06	6.08325e+06	6.00285e+06	5.52743e+06	5.24761e+06	6.54849e+06	4.33918e+06	6.6134e+06	5.5522e+06	5.24921e+06	5.77053e+06	5.39379e+06	6.28559e+06	5.83235e+06	6.8224e+06	5.45023e+06	5.98066e+06	5.55396e+06	6.82382e+06	6.37332e+06	1.00117e+07	7.97419e+06	9.32065e+06	7.70701e+06	8.22958e+06	8.39041e+06	9.38732e+06	8.56772e+06	8.89086e+06
HMDB00068	NA	NA	NA	NA	NA	NA	NA	NA	5748.01	NA	NA	NA	NA	1780.33	NA	NA	3945.91	2134.71	1555.41	NA	NA	1896.26	1806.41	NA	1442.96	1999.78	3055.07	NA	2080.67	3198.27	6959.6	8129.34	6497.26	3031.47	3967.15	6708.24	8178.63	4096.87	3325.55	8660.5	2866.97	6505.8	4754.36	5605.65	7067.79	7834.34	2130.01	4387.23	6403.92
HMDB00070	4.8179e+06	3.85658e+06	4.71729e+06	5.63089e+06	4.38865e+06	5.69206e+06	4.87841e+06	4.61457e+06	4.30564e+06	3.49915e+06	3.41419e+06	3.31273e+06	3.33339e+06	4.38512e+06	4.3057e+06	2.92254e+06	4.07152e+06	3.35187e+06	4.35235e+06	3.59508e+06	4.61567e+06	4.38928e+06	3.7519e+06	5.72582e+06	5.08427e+06	4.90803e+06	5.6742e+06	4.3171e+06	5.2157e+06	5.00627e+06	2.19108e+07	2.3123e+07	2.03363e+07	2.11748e+07	1.96672e+07	2.04547e+07	2.02152e+07	2.01638e+07	2.30556e+07	2.13401e+07	2.05909e+07	2.13259e+07	2.03098e+07	2.18447e+07	2.27905e+07	2.15965e+07	2.06419e+07	2.01323e+07	2.16043e+07
HMDB00072	122954	137462	137288	172183	136922	137613	76494.4	166115	176082	87621.1	89526	116305	88057.8	62436	68342.9	132958	108521	66902.4	52380.2	120837	134167	136841	118569	101640	110009	124575	118729	124156	76027.7	127402	69322.1	32158	72201.4	47225.7	57821.1	36831.9	39506.1	50776.5	49642.2	40312.2	57995	63301	53712.7	54879.8	41655.8	51876.2	41333.8	53259.7	50609.2
HMDB00086	6.36542e+06	5.85462e+06	7.63224e+06	6.6325e+06	5.60308e+06	6.66249e+06	6.74886e+06	5.71153e+06	5.05392e+06	5.23589e+06	9.57257e+06	8.22146e+06	7.60561e+06	8.48608e+06	9.22863e+06	8.4372e+06	8.82971e+06	8.97682e+06	8.6754e+06	7.63689e+06	4.08992e+06	3.99914e+06	4.62026e+06	4.46595e+06	5.07069e+06	4.12771e+06	5.24796e+06	4.91532e+06	4.48524e+06	4.45556e+06	1.61406e+07	1.69547e+07	1.51201e+07	1.44618e+07	1.32746e+07	1.56353e+07	1.64622e+07	1.61823e+07	1.43341e+07	1.57709e+07	1.4255e+07	1.37912e+07	1.32229e+07	1.40639e+07	1.59851e+07	1.36945e+07	1.61909e+07	1.50509e+07	1.42595e+07
HMDB00089	80107.7	60314.4	70156.6	75931.1	67490.8	58239.7	84554.7	66264.6	95047.6	70502.7	82835.5	76054.8	113020	94687.5	79538.2	104473	74695.5	79930.4	98744.8	94008.6	146705	150224	135910	143177	194624	151256	109007	193308	180429	200515	230421	198997	287550	200579	243946	292802	270901	230228	250932	335235	212777	190251	224288	215103	196985	175085	199532	205380	214111
HMDB00092	52730.8	31887.4	38717.1	45509	42042	25376.3	49719.8	55068.7	27965.1	31975.1	75125	48202.2	63310.8	60112.8	48449.8	64328.1	67628.5	52236.5	72609.6	75967.8	15015.2	23287.3	25013.8	27389.2	24423.2	19565.3	12860.9	34990.1	16531.1	29588	24193.8	22471.5	30058.5	28864.2	31123.3	31377.6	42962.2	28026.3	27742.2	44111.5	25587.4	34844	38722	38719.7	27277.4	24812.9	28573.4	42153.4	30314.5
HMDB00094	1.28954e+06	1.19239e+06	1.00185e+06	1.02462e+06	1.12926e+06	1.04756e+06	1.07505e+06	674652	1.22006e+06	1.02265e+06	1.91851e+06	1.08513e+06	1.50215e+06	1.35445e+06	1.4181e+06	2.97656e+06	2.71846e+06	2.5621e+06	1.96092e+06	1.31212e+06	2.74213e+06	2.10268e+06	3.08708e+06	1.9286e+06	1.46221e+06	3.79917e+06	2.42584e+06	2.31555e+06	1.64223e+06	1.82085e+06	895949	691098	740881	686566	524707	845212	1.02659e+06	517538	500272	585098	709044	896490	430554	410408	447445	724047	451102	579315	460181
HMDB00095	122233	146222	112298	124667	108345	90368.5	113816	103978	133883	110013	93329.5	126251	100757	98594.1	112795	94315.2	84625.1	105167	146295	122929	133299	114431	136917	145096	122792	128496	140679	120016	136303	122472	317907	279661	261321	273026	329628	223471	273309	286167	261849	307166	249673	184476	239036	257170	264054	185079	268460	265692	269576
HMDB00097	86682.7	66120.9	75417.7	77932.3	100708	110428	83620	108863	40934.8	43641.7	79869.5	71582.7	104806	6771.07	109918	95324.3	64350.5	52838.2	65374	65444.5	42468.9	58801.1	41974	31001.5	19004	48680.3	34613	97696.4	46921.6	45277.1	118912	122974	129384	150103	126397	134723	142752	144827	95909.9	148002	101504	107715	122754	103223	88676.1	116305	155791	105770	93488
HMDB00099	22527.3	6741.71	13636.8	11065.7	12076	9210.91	6060.61	8619.48	9052.4	18637.4	50802.1	50985	38388.7	51240.7	31013.3	35955.8	32290	33519.4	36936.9	53953.4	24807	27941.7	27531.4	25431.6	15810.7	31683.1	40954.9	29069.7	28740.6	22883.1	11294.3	9149.61	5745	5133.36	10675.9	5828.57	10638.5	8141.29	8145.23	11199.5	28436.4	52110.6	47561	57228	52050.8	24783.4	45078.6	44190.1	60185
HMDB00112	2.89553e+06	2.00641e+06	3.10838e+06	3.04665e+06	2.5109e+06	2.1159e+06	2.92027e+06	2.41902e+06	2.1851e+06	2.88463e+06	6.6215e+06	5.85443e+06	5.6164e+06	6.36253e+06	4.01761e+06	4.80282e+06	6.26028e+06	4.36261e+06	5.36537e+06	5.22304e+06	2.10629e+06	2.27343e+06	1.9236e+06	2.08805e+06	2.35035e+06	2.24927e+06	1.84196e+06	1.65081e+06	1.90443e+06	2.14199e+06	1.65244e+06	1.75343e+06	2.15178e+06	1.71801e+06	1.84325e+06	2.03553e+06	1.8796e+06	1.80563e+06	1.61417e+06	1.89024e+06	2.16537e+06	1.8925e+06	2.1687e+06	2.24971e+06	1.97649e+06	2.42626e+06	2.03203e+06	2.60002e+06	1.97552e+06
HMDB00119	8465.6	5457.2	5840.53	6404.84	5803.48	4565.18	2258.64	5954.6	7059.82	8191.39	7858.87	5524.95	4964.49	3438.95	3809.21	6527.54	3291.98	5828.33	5218	4441.81	2942.41	2988.99	8508.67	8509.42	5874.54	5741.33	4187.08	4676.22	4581.75	6915.7	8622.9	11367.4	7672.45	7846.3	9076.7	10381.4	7187.63	2946.93	4096.1	5160.07	5300	13001	8995.71	6869.2	6354.21	11256.7	4930.42	5256.29	9334.86
HMDB00122	3.4204e+06	3.01793e+06	3.35323e+06	3.499e+06	2.99988e+06	3.20717e+06	3.16965e+06	2.70185e+06	2.90535e+06	2.52449e+06	4.07768e+06	3.22615e+06	4.42648e+06	3.38863e+06	4.52282e+06	4.01234e+06	3.84523e+06	3.8388e+06	4.03142e+06	2.97328e+06	2.88767e+06	3.49327e+06	2.60771e+06	2.3656e+06	3.06595e+06	2.81241e+06	2.61331e+06	3.11965e+06	2.93896e+06	3.15309e+06	595775	582702	712110	648910	618845	755658	729276	709657	548692	725862	572547	555136	631159	545478	563354	565735	579871	611917	567313
HMDB00124	82895.2	156287	62783.4	60079.4	86244.9	67990.6	80134.5	95909.6	84513.3	110413	43037.2	24025.3	46172.5	45123.6	100580	37042.7	15965.9	56095.2	56422.4	89383.5	5835.81	8001.9	17919.1	25452.6	12972.5	14360.2	39926.8	10039.9	11734.4	10701	NA	NA	NA	NA	NA	3886.14	NA	NA	NA	NA	NA	NA	NA	NA	NA	2636.07	1798.84	NA	NA
HMDB00125	354796	391826	979471	292475	358294	436550	439718	553114	383325	395058	306987	312792	331263	267548	419473	373348	364127	409065	206748	434011	578755	586035	422467	444932	744221	580740	520714	321038	746233	716666	2.15864e+06	1.99043e+06	1.82316e+06	1.77779e+06	2.36238e+06	3.71753e+06	2.34021e+06	1.88808e+06	1.47296e+06	1.94476e+06	2.56724e+06	2.624e+06	3.55213e+06	3.44328e+06	3.86597e+06	3.51897e+06	3.67032e+06	4.28995e+06	3.46001e+06
HMDB00126	2.49502e+06	2.47955e+06	3.398e+06	2.17973e+06	2.74048e+06	2.90549e+06	2.71919e+06	2.63046e+06	2.67298e+06	3.00386e+06	3.42258e+06	3.16442e+06	2.6806e+06	3.1053e+06	2.60459e+06	3.15715e+06	3.43479e+06	3.18526e+06	3.27042e+06	3.57489e+06	4.24771e+06	3.80096e+06	2.9149e+06	3.41957e+06	4.35085e+06	3.46455e+06	3.80933e+06	3.8799e+06	4.24206e+06	4.75497e+06	976562	974425	1.05042e+06	775399	1.01538e+06	941631	1.20568e+06	1.38905e+06	1.11365e+06	1.19086e+06	1.27401e+06	1.00245e+06	1.10689e+06	1.33477e+06	1.20548e+06	1.06724e+06	1.20633e+06	1.21417e+06	1.17344e+06
HMDB00128	15636.4	20707.6	46358.4	57680.5	16316.4	32476.8	35794.4	33342.2	20880	12767	52218.4	24364.1	16646.4	26707.5	45715.2	9929.24	17092.4	11353.3	27985.5	20597.8	10503.1	37676.3	14911.4	21261.9	15814.8	42695.2	27886.8	8306.83	16971.8	25824.3	26837.9	28154.3	18062.8	30972.4	29482.4	35265	26212	31430.2	35759.7	18715.1	11208.1	26691.3	22823	21643.6	32953.6	16887.3	19878.5	30435.1	19571.9
HMDB00132	34193.1	30687.7	26714.3	24850.4	26688.4	24845.4	37487.9	45770.7	39996.3	42410.7	30313.7	23175.3	35889.3	37244.8	34325.9	21679.2	33547.1	34554.2	43758.7	35154.6	31559.5	33877.7	35837.1	28047.1	28714.1	28785	23877.1	26340.5	23237.2	29660.3	100037	73795.3	119771	97362	96571.8	80972.3	90209.1	88837.7	94364.4	98679.2	55251.5	63542.6	67733.1	79677.5	77843.1	66349	72178.7	85605.4	72925
HMDB00133	24475.5	26626.8	25443.5	29024.7	17401.8	20619.6	26924	23164.4	27156.9	31062.7	27969.8	27496.2	34727.5	23451.1	25371.2	20670.5	21644.6	17635.6	24865.1	47010.6	24151.2	24064.1	19540	21581.5	20615.4	20865.7	13859.8	27565.8	26189.2	28408.4	29323	37645.4	50799.7	44526.3	44290.2	47830.9	35110.4	44910.7	33118.7	43436.1	31762.7	24467.4	28280	37738.2	21173.6	44994.4	30344.8	35024.9	31155.6
HMDB00134	1.65881e+06	2.04416e+06	1.45127e+06	1.70954e+06	1.53447e+06	1.97873e+06	1.71473e+06	1.56567e+06	2.02263e+06	1.98202e+06	1.63875e+06	2.05322e+06	1.60872e+06	1.68751e+06	1.64361e+06	1.77818e+06	1.62695e+06	1.56757e+06	1.59118e+06	1.75633e+06	1.63314e+06	1.62739e+06	2.04368e+06	1.75525e+06	1.70704e+06	1.79492e+06	1.97662e+06	1.62591e+06	1.67292e+06	1.54623e+06	1.18018e+06	1.2149e+06	1.19719e+06	1.22567e+06	1.30042e+06	1.28625e+06	1.16934e+06	1.1821e+06	1.3142e+06	1.10966e+06	1.14745e+06	1.22648e+06	1.11185e+06	1.27174e+06	1.07932e+06	1.1798e+06	1.1261e+06	1.03082e+06	1.01046e+06
HMDB00139	31336.7	19316.8	29192.7	35685.6	39766.9	59629.9	43989.9	15502.1	39794.7	62559.8	38090.1	17097.4	24559.1	18122.4	15991.2	41162.5	27898.8	24292.6	29678.6	26238.7	20775.4	13827.5	27192.1	24545.3	27526	14037.2	21405.9	41070.9	14645.7	8365.51	35815.1	38307.2	44599.1	43907.5	51706.3	38359	48818.2	44342.6	46665.9	42173	43695.5	58362	47822.8	33141.4	34917.6	43962.4	40810.9	38520.2	38246.4
HMDB00149	20133.6	28907.4	4789.19	25675.3	9761.49	47315.3	26664.4	23043.1	18806.5	10905.5	7298.4	25132.9	2692.58	24972.4	7501.09	8346.47	5842.85	4783.53	17515.6	5910.35	7446.63	6684.24	6294.97	12141.6	8187.41	13650.8	11670.8	22938.3	5800.07	11453.2	121541	101032	53112.8	64744.3	140813	131290	53116.9	50004	110271	100679	85685	68033	46483	97668.8	83873.9	74650.8	64904.4	119290	73599.8
HMDB00150	4172.41	4602.33	4098.5	8305	4982.69	NA	6411.77	5386.97	3767.73	6905.5	3768.5	NA	3611.69	4974.73	3465.51	4056.86	4958.6	3918.81	4505.19	NA	2709.91	5508.07	1752.55	NA	3548.19	5610.2	4751.09	3502.97	3737.3	7562.44	NA	2796.24	NA	NA	NA	1889.88	1550.02	1117.27	NA	NA	1807.28	NA	3001.52	NA	NA	NA	1411.78	NA	NA
HMDB00157	1.01935e+06	825538	1.20661e+06	859170	885730	1.17008e+06	1.23602e+06	811601	754603	920377	2.50543e+06	1.84847e+06	1.69205e+06	1.97656e+06	1.10421e+06	2.20105e+06	2.4492e+06	2.10803e+06	1.75428e+06	1.73925e+06	1.11032e+06	1.1873e+06	1.02514e+06	956714	1.36264e+06	1.01916e+06	979071	1.27192e+06	1.40138e+06	1.41229e+06	882624	591907	1.13296e+06	768787	948098	1.09155e+06	1.10957e+06	1.04959e+06	673402	786906	1.17278e+06	1.06463e+06	1.09686e+06	1.02849e+06	706621	1.25519e+06	993162	1.17076e+06	1.01645e+06
HMDB00158	58664.8	53224.8	55253.9	54399.9	41914.6	40726.4	54811.7	33403	55440.9	67980.4	59310.7	59531.6	73673.2	91489.6	95286.1	48170.4	58353.7	59215.7	76942.2	91727.2	53573	53623	76248.4	67443.9	37712.9	52683.7	74880	49256.1	50165.7	47591.2	127809	112885	119855	112468	104681	109805	112588	96988.9	124598	136963	89257.4	87881.1	89410.2	138449	116546	102843	102648	101753	112568
HMDB00159	178498	139067	134402	155722	109915	165278	138853	93199.2	118407	152823	170576	161180	142167	190267	219082	185827	250984	126153	149901	251146	153784	136831	189209	168226	151269	154758	170265	134235	206285	174172	309332	376240	332741	312376	306209	269146	364135	291478	379384	453319	281036	300945	265068	365656	348431	247703	265142	286352	328893
HMDB00162	474436	314941	541109	497002	501129	353636	461901	359058	387775	370776	393397	378979	384339	547040	388831	427678	637230	627741	540024	468958	494841	436466	338597	404536	531445	435286	508334	392647	446530	511770	829936	972555	1.12293e+06	1.05214e+06	798661	1.19359e+06	1.03879e+06	905214	897956	996944	586620	525278	589463	664926	681426	606612	669487	700948	715808
HMDB00167	252592	162363	272214	199368	216680	226991	194766	152212	186668	171962	422622	271356	225426	301008	235360	225508	323531	300988	294743	277062	222277	262803	238581	377436	314157	237688	364235	257031	273110	248553	443611	374577	393390	431606	386408	646470	507643	425555	351256	388388	412246	355872	341306	434570	420315	476301	446832	524227	519301
HMDB00168	85696	97291.9	70673.6	88476.7	74239.3	72301.3	60213.8	72123.6	53568.6	72207.2	77545	75912.5	88899.1	95249.6	79315.3	104331	82054.1	79052.1	83627.9	59239.9	71754.7	63020.5	62928.7	73271	75501.7	54648.9	41197.5	62955.8	59892.6	52159	175303	157254	193610	153509	179431	232815	221457	228342	180359	207630	152701	163588	137695	156775	172587	172063	200334	177177	157805
HMDB00175	940358	1.17568e+06	976466	1.13619e+06	981410	1.03451e+06	1.0756e+06	976667	1.00071e+06	796057	1.30748e+06	1.19253e+06	1.02216e+06	1.24114e+06	1.08889e+06	1.22302e+06	1.41415e+06	1.14317e+06	1.4902e+06	1.08094e+06	1.05843e+06	1.03984e+06	936649	1.27016e+06	1.24383e+06	1.0343e+06	1.07188e+06	894263	1.34318e+06	1.10374e+06	2.83476e+06	2.32054e+06	2.57418e+06	2.63896e+06	2.69244e+06	2.75873e+06	2.77468e+06	2.6408e+06	2.22519e+06	2.83446e+06	2.79592e+06	2.50721e+06	2.36693e+06	2.45634e+06	2.64578e+06	2.46434e+06	2.93376e+06	2.20548e+06	2.30991e+06
HMDB00176	1.80121e+06	2.13681e+06	1.52883e+06	1.68884e+06	1.85037e+06	1.86865e+06	1.71574e+06	1.71108e+06	1.7967e+06	1.81502e+06	1.64018e+06	1.90438e+06	1.56042e+06	1.63967e+06	1.70476e+06	1.68549e+06	1.54913e+06	1.5617e+06	1.70169e+06	1.7792e+06	1.7839e+06	1.62699e+06	2.02225e+06	1.71623e+06	1.55538e+06	1.64144e+06	1.93135e+06	1.58803e+06	1.62589e+06	1.59243e+06	1.2629e+06	1.18367e+06	1.26438e+06	1.42838e+06	1.39984e+06	1.32093e+06	1.30484e+06	1.26359e+06	1.33184e+06	1.21903e+06	1.13847e+06	1.33364e+06	1.17683e+06	1.29199e+06	1.18064e+06	1.20781e+06	1.27335e+06	1.1639e+06	1.20171e+06
HMDB00177	393150	337341	230475	339679	299647	231378	307907	240720	304598	334499	299569	338192	292315	351128	351462	349131	316878	240886	470161	389583	252532	304251	352551	399486	264942	426142	372635	261188	268911	269491	1.21564e+06	898681	1.12867e+06	845338	1.2096e+06	1.12942e+06	793340	1.05022e+06	1.26524e+06	1.42712e+06	658652	411882	725175	842276	806186	768904	651272	789653	871190
HMDB00182	9687.28	6299.25	12695.9	6418.86	14491.7	12240.2	8122.37	7050.2	6349.44	13459.4	13813.5	16056.5	16904.5	44771.9	20501.8	24366	19850.1	17902.9	23777.7	41100.8	24994.6	16814.9	26428	33917.8	34554.8	19343.9	28056.3	24241	31817	17852.4	30002	35159.7	26267.4	23127.2	41403.2	23941.6	29832.2	40381.6	34239.8	31923.3	44422	20338.2	42730.7	19083.8	45885.3	30100.4	28360.6	45022.6	40394.7
HMDB00187	614952	638977	675878	576639	781822	510467	580602	602827	530364	867669	842393	774120	644438	720553	830236	730792	636216	735090	523347	637369	679913	752756	766893	779763	700659	802582	655343	810707	705394	800676	758660	800756	904486	901195	993376	816359	788819	887926	919239	790308	796793	608101	784997	702151	613570	656902	656526	694272	645706
HMDB00190	1.26587e+07	1.16343e+07	1.1929e+07	9.97613e+06	1.23837e+07	1.29029e+07	1.34629e+07	1.08352e+07	1.14222e+07	1.17581e+07	1.42344e+07	1.28344e+07	1.23748e+07	1.36546e+07	1.44505e+07	1.28286e+07	1.25392e+07	1.26534e+07	1.28763e+07	1.37575e+07	1.22867e+07	1.27279e+07	1.32387e+07	1.32803e+07	1.21281e+07	1.1696e+07	1.33689e+07	1.24222e+07	1.27181e+07	1.21805e+07	1.11305e+07	1.16101e+07	1.06992e+07	1.11914e+07	1.10134e+07	1.13425e+07	1.12725e+07	1.13908e+07	1.06548e+07	1.21528e+07	1.00085e+07	9.6392e+06	1.01327e+07	1.11704e+07	1.08285e+07	9.02845e+06	8.76295e+06	1.12307e+07	9.47082e+06
HMDB00191	963518	973461	777183	682408	776828	852996	844948	527087	708686	817491	1.1226e+06	1.03861e+06	950311	1.11461e+06	1.14035e+06	808820	1.06526e+06	1.02173e+06	853609	1.03328e+06	642755	676494	765673	737561	782608	1.05123e+06	851128	610737	743928	836746	1.6443e+06	1.44477e+06	2.10532e+06	1.51318e+06	1.89593e+06	1.59008e+06	1.37624e+06	1.34162e+06	1.68244e+06	1.44732e+06	1.66386e+06	1.29835e+06	1.26449e+06	1.46113e+06	1.41402e+06	1.25952e+06	1.32046e+06	1.16786e+06	1.09149e+06
HMDB00192	NA	NA	NA	NA	NA	NA	NA	NA	NA	3802.28	2495.59	2138.79	1609.58	1596.52	NA	1780.38	2129.29	1523.96	2523.06	1926.18	3333.79	1630.22	NA	1737.53	2487.87	2020.71	1447.7	2338.55	2550.58	NA	1613.64	1775.41	4246.07	2454.13	4118.18	3676.91	5786.78	2348.19	3774.59	3322.4	3863.41	5590.8	4285.46	4281.13	2576.17	5470.49	5600.87	3067.9	3225.01
HMDB00193	21020.8	31923.3	13294.5	14202.9	18212.2	38633.8	16899.6	12701.6	31275.2	18484.2	14608.9	16576.5	23951.8	20973.8	15636.5	18164.3	17208.1	19339.5	27146.9	23635.3	18022.6	22305.1	21665.8	17935.7	18724.1	18566.4	25263.4	19482.3	19790.4	14047.5	NA	3064.56	1554.81	4237.51	2127.66	1928.23	2031.65	NA	5886.5	NA	NA	2871.53	3583.11	NA	2267.9	NA	NA	1129.13	NA
HMDB00201	1.01688e+07	1.24255e+07	1.16146e+07	1.44194e+07	1.12514e+07	9.84886e+06	1.18411e+07	8.98283e+06	8.50435e+06	1.36956e+07	1.85374e+07	1.70506e+07	1.42284e+07	1.63199e+07	1.41265e+07	1.63683e+07	1.47969e+07	1.28865e+07	1.41656e+07	1.53091e+07	1.18068e+07	1.03276e+07	1.36425e+07	1.1884e+07	1.11896e+07	1.26817e+07	1.38125e+07	1.25712e+07	1.28844e+07	1.08102e+07	1.59714e+07	1.91737e+07	1.28665e+07	1.71088e+07	1.47624e+07	1.5603e+07	1.5707e+07	1.71456e+07	1.93727e+07	1.67584e+07	2.09914e+07	2.31967e+07	2.1154e+07	1.99896e+07	2.32037e+07	2.20571e+07	2.29003e+07	1.99974e+07	2.39652e+07
HMDB00202	3.9016e+06	3.89431e+06	4.44226e+06	3.54278e+06	4.2311e+06	4.56569e+06	4.04298e+06	4.67059e+06	3.73636e+06	4.02971e+06	4.37523e+06	3.68158e+06	3.8438e+06	3.75811e+06	3.24957e+06	3.89792e+06	3.53364e+06	3.85634e+06	3.42653e+06	4.04351e+06	5.10218e+06	4.31477e+06	4.17037e+06	4.34144e+06	4.43945e+06	4.2858e+06	4.44223e+06	4.62213e+06	4.37496e+06	5.0712e+06	2.02359e+06	1.83258e+06	2.23386e+06	1.86551e+06	2.12201e+06	1.91622e+06	2.17161e+06	2.36072e+06	1.98993e+06	2.16366e+06	2.71692e+06	2.23649e+06	2.656e+06	2.2028e+06	1.98907e+06	2.53497e+06	2.33086e+06	2.59496e+06	2.20475e+06
HMDB00206	146985	215902	144985	334726	260508	148571	274027	167021	195865	344703	168570	145292	292593	198424	204086	193436	322277	313236	292337	403759	229036	381626	377112	401343	270238	316326	295347	360542	420584	286749	556943	637764	639178	423975	256368	382711	429986	518233	153871	515438	128062	312684	324716	276471	307902	263838	446853	403306	405330
HMDB00208	589289	664456	502866	537549	635930	595382	535835	497287	644886	512072	529079	432008	527725	658454	720522	582444	608744	506969	640462	631369	528697	502222	534577	535415	498943	634024	572329	475352	469749	487544	39244.4	44141	43718.6	54889.4	54958.5	72222.9	48200.8	61773.9	52250.9	54296.8	50915.9	47639.2	62483.2	43498.5	31395.3	53018.1	59848.9	42948.5	39353.4
HMDB00210	17208.1	27588.7	19119.6	17724.5	28238.5	14457.9	16203.4	25217.2	25604	16779.2	53267.6	15893.7	21848.9	12302.6	9006.55	33764.7	23306.5	8128.75	24635	34649.9	23454.1	30870.5	23105.9	29900.3	22989	23524.4	17825.6	13135.5	22529	19087.1	NA	1945.91	NA	NA	NA	NA	1859.81	2401.89	NA	NA	2358.43	NA	2595.45	1537.84	1975.61	NA	1221.45	3200.25	1527.02
HMDB00211	4280.13	13492.5	13409.8	10381.6	9567.74	16300.6	7959.41	9050.35	25725.6	20285.1	10606.2	22112.7	7169.76	15994.9	4756.54	15751.3	3130.95	9833.85	3415.57	4628.09	2179.55	5639.93	6251.52	8855.01	11488.2	7359.54	8649.75	NA	2720.66	5469.1	2.18875e+06	2.46682e+06	2.6592e+06	2.44739e+06	2.60199e+06	2.62671e+06	2.95534e+06	2.87397e+06	2.14993e+06	2.70525e+06	2.06572e+06	2.14419e+06	2.40015e+06	2.20028e+06	2.25522e+06	1.9825e+06	2.16551e+06	2.48184e+06	2.21705e+06
HMDB00214	5840.78	NA	1798.64	NA	NA	NA	NA	4847.13	NA	NA	NA	NA	NA	NA	NA	NA	NA	NA	NA	2096.55	NA	NA	NA	NA	NA	NA	NA	4323.19	NA	NA	15450	20965.6	19943.6	29529.4	19652	12213.3	13105	9468.96	9887.73	4812.95	10613.1	15345.9	17124.7	9540.85	10241.1	12590.1	8893.49	7485.12	10421.4
HMDB00217	40321.4	23058.4	20558	19130.6	38004.1	18831.5	24579	45252.5	21042.6	32789.7	16007	21616.4	17864.3	19505.7	33931.8	37272.4	30160.2	36584.4	29912.7	28514.4	61790.2	43442	32795.6	36040	39652.5	33208.3	36609.2	14467.5	39964	35790.7	163830	152522	191917	163134	158573	166390	169733	172351	159654	190405	144398	182812	173528	197261	175043	201153	165276	184930	163086
HMDB00223	251888	224454	145828	286783	214137	187124	186815	178204	237187	194484	148624	164629	89341.4	118127	137198	92678	79827.2	51343	139596	95952.2	96172.4	111459	167429	108670	48144.4	59868.6	111912	90317.7	103794	60763.2	138842	157198	152922	183731	169281	123548	138163	140496	159106	122157	196640	207836	215567	179173	149997	189063	194459	143010	162188
HMDB00226	16919.8	18118.5	24231.1	7824.59	10539.2	11736.9	10577.8	24999.7	40796.3	13312.3	16546.9	33659.4	4954	17228.8	8684.72	31781.9	13247.7	21139.5	12977.5	9016.07	11654.1	27930.2	39820.7	10817.2	7172.17	33321.7	38499.9	19151.1	13217.9	9241.9	NA	6791.19	4751.31	8658.04	5975.55	6380.23	6046.27	NA	NA	14834	6937.93	8451.16	4283.32	5700.27	15204	7651.93	4929.47	8842	8563.51
HMDB00229	6164.87	7136.9	5928.73	8201.87	3550.44	NA	6382.88	8075.6	9041.86	7943.24	8118.65	6510.96	11754.3	10053	6261.73	4830.09	11875	7698.85	6587.85	9206.15	13120.7	2223.51	9828.18	7525.2	10687.2	7843.6	6708.22	5763.48	13892.5	10309.7	3516.84	3452.08	3386.24	NA	5185.58	3064.24	2658.74	4966.23	NA	5010.98	2092.18	4594.52	7393.02	NA	2684.53	4043.11	5210.12	2869.91	4282
HMDB00232	199664	256445	175030	174604	268654	258273	203814	315002	234408	239082	150873	194655	123482	110267	126727	122840	78209.5	110629	109182	134881	118480	113103	140034	113563	99001.9	110647	114405	125483	112162	131377	3921.92	3992.48	9627.7	24820.8	22074.9	6129.19	9096.76	4243.71	7360.91	13277	26299.5	28124.2	30454.7	22174.1	25475.9	11319.4	13511.9	18244.9	19911.2
HMDB00243	5169.59	4142.96	3529.67	2813.32	4393.24	7995.65	2208.83	12437.8	7423.15	7360.72	8691.45	10068.2	4418.39	4655.61	5767.53	3164.07	5819.96	1144.67	7228.59	3077.18	6187.55	5210.41	7057.22	2593.61	3991.96	2225.27	6029.19	4462.67	9202.28	4134.7	6113.89	4215.61	4112.33	7342.94	8781.41	4129.33	8349.91	9819.81	2549.35	6416.57	5794.65	7226.89	2435.83	7897.87	5377.96	2510.21	6783.79	2657.82	7843.32
HMDB00244	NA	NA	3083.88	NA	NA	NA	NA	NA	NA	2414.94	3753.76	NA	NA	3215.61	1641.2	NA	1420.09	1089.03	1801.2	NA	NA	3268.43	2403.08	2312.49	2843.63	NA	1649.84	2328.87	1529.75	1843.73	4517.94	4187.94	9579.13	4185.45	3443.95	9582.49	7246.62	6384.99	2945.52	7088.38	5040.66	4542.89	4715.1	3651.04	2471.05	7734.33	4489.06	5565.48	4760.84
HMDB00250	65525	51194.5	74088.4	54895.6	69053.8	61198.3	74342.8	27805.6	23104.4	38034.2	93380.6	84739.7	113431	129395	127396	122077	174384	109938	139556	120283	117312	147724	123718	122821	143114	116635	114725	132700	169730	168477	10949.7	8654.69	15299.5	9553.42	7707.58	18182.8	11972.5	13408.1	5675.37	12417.9	15030.9	4928.54	6635.62	4933.68	11042.4	7545.78	5609.1	14208.1	6625.13
HMDB00251	2.97826e+07	3.28239e+07	2.75777e+07	2.97967e+07	3.13046e+07	3.38965e+07	3.2439e+07	3.82472e+07	3.11452e+07	2.94829e+07	2.92042e+07	3.08704e+07	2.62475e+07	2.55913e+07	2.49518e+07	2.83357e+07	2.54737e+07	2.84836e+07	2.59814e+07	2.83055e+07	3.06124e+07	3.18504e+07	3.06649e+07	2.95675e+07	3.01199e+07	3.11657e+07	3.07783e+07	3.21813e+07	2.95525e+07	2.82404e+07	2.34563e+07	2.28988e+07	2.67139e+07	2.55816e+07	2.65796e+07	2.375e+07	2.41563e+07	2.47331e+07	2.37634e+07	2.30528e+07	2.54801e+07	2.54326e+07	2.61674e+07	2.37532e+07	2.3499e+07	2.51903e+07	2.42649e+07	2.40132e+07	2.39827e+07
HMDB00254	3.12984e+06	3.05609e+06	3.58942e+06	2.88717e+06	3.47202e+06	3.58082e+06	3.12009e+06	3.55761e+06	3.17588e+06	3.27093e+06	3.48644e+06	3.13895e+06	3.02005e+06	2.90994e+06	2.93631e+06	3.3695e+06	2.84411e+06	3.15853e+06	2.71829e+06	3.07899e+06	3.73505e+06	3.72669e+06	3.48333e+06	3.43054e+06	3.68292e+06	3.42072e+06	3.53594e+06	3.85932e+06	3.7658e+06	3.96513e+06	1.64149e+06	1.50362e+06	1.85735e+06	1.54114e+06	1.77764e+06	1.48862e+06	1.75234e+06	1.80565e+06	1.67444e+06	1.60677e+06	2.15734e+06	1.78184e+06	2.08541e+06	1.93161e+06	1.61747e+06	1.90804e+06	1.85145e+06	2.05386e+06	1.68688e+06
HMDB00262	2756.89	3085.82	NA	2820.51	NA	13341.2	6352.09	3273.21	NA	NA	1662.59	3260.6	2911.51	1997.22	1628.81	4105.14	2171.25	NA	4113.8	4878.56	NA	3271.67	3510.86	1976.08	2274.53	3149.81	1591.22	2269.26	NA	3127.47	20804	19335.2	22733.7	24736.6	26769.6	23817.4	24870.1	25514.7	16610.6	21821	19626.9	24831.8	16643.8	28161.5	16657.9	22712.6	20616.6	23319.8	23278
HMDB00263	45786.3	36186.4	14281.8	32821.5	56843.7	39913.1	35026.1	38251.7	48489.1	45762.5	21827.2	8940.1	16283.2	19530.3	26176.3	16989.2	15791.4	38592.6	27074.5	23413.6	27195.2	44348.7	32613.8	33289.3	31561.6	28584	42348.5	27199.7	48838.8	23339.5	56897.4	95004	40156.3	31555	42463.6	53443.1	57001	59544.9	45820.5	60708.2	34469.1	38212.5	47210.1	68463.4	60305.3	5208.73	24502.3	33535	37852.3
HMDB00267	63265.4	92049.5	87388.3	70498.1	78818.8	109029	93383	96102	62066	80579.4	70565.1	54487.8	61443.6	61850.2	71949.6	65040.6	65589.4	64843	56579.5	55384	98157.6	73934.8	73279.9	96166.6	95919.7	81896.6	96525.7	102271	106205	80526	76981	68310.5	69555.8	74435.9	81307.5	72885.6	73588.8	67107.7	71886.2	68164.1	63826.3	38132.3	59093.3	65036.9	47086.8	51921.7	51440.7	43351.3	46493.7
HMDB00271	256995	210744	237159	217592	204468	288519	220147	183147	220020	252054	280020	225927	250341	267181	230776	192052	241848	224482	250861	289043	260192	315224	364340	337648	297855	286923	285751	363265	397947	338700	503335	513847	568794	466986	678962	668616	570217	498943	609278	466275	444940	510352	448138	486434	430176	464094	498821	469225	406176
HMDB00273	4197.49	NA	NA	NA	1773.14	5170.19	NA	8079.63	3394.77	4927.23	NA	1601.57	1405	2143.51	NA	2546.68	NA	1960.31	NA	1359.8	NA	6730.37	4151.3	1360.63	1367.83	NA	2853.8	5124.65	2551.28	2229.77	1936.2	NA	1567.44	2084.53	NA	1943.2	NA	2713.46	1558.44	1061.69	NA	NA	NA	NA	NA	1230.23	1794.85	1630.34	NA
HMDB00286	179675	153979	151366	116897	150220	147396	161616	160547	201039	200181	167676	141216	126671	143364	196657	219129	206243	218394	192477	199420	215346	211900	190310	209674	221818	217235	173956	141011	302028	253457	325444	298298	292593	282721	265263	281268	295111	278083	230119	318574	287589	265937	258801	302990	282960	265066	316990	289358	261211
HMDB00288	32476.5	43283.4	30836.7	42378.5	29496	25866.7	37373	61953.9	32435.6	35204.1	36536.2	31497.5	36630.1	23057	38900.7	30133.4	27323.2	26570.5	31442.4	32571.4	23983.3	28552.1	32123.5	38315.3	23993.5	31151.5	30442.2	39220.9	33651.1	22118	68657.6	97359.4	63574.4	71191.8	81242.9	70751	73076.2	66484.9	80946.5	82907.6	65902.6	74677.5	79088.9	69077.8	86922	68691.7	81847.5	61695.3	87753
HMDB00289	15747.3	13367	18983.6	14538.1	23470.4	8874.53	18536	21312	14802.9	16504.7	28471.7	15285.9	23901.3	32840.8	22015	14735.7	16747.8	12513.3	22001.4	23654.2	16022.3	17669.8	20992.5	19902.8	16934.4	17419.9	19647.8	18216.7	17101.3	17121.6	8691.95	11578.8	11302.2	9357.72	13918.8	14952.8	8233.65	8471.25	9902.05	8625.85	9491.66	9324.49	8654.29	7581.25	6596.41	7487.48	8343.12	6853.52	6342.63
HMDB00290	57572.8	49669.7	33150.8	32584.3	53638.1	42111.9	47304.7	54952.7	34701.3	68336.2	54056.3	33101.5	46572.5	43880.2	54591.4	66439.9	51806.8	60750.1	52256	57803.2	53159.2	47113.2	50712	45670.2	52966.6	52064.6	41160.6	23345.9	53571.3	54605.5	97781	109753	77851.4	86699	82781	92972.1	101758	101043	71567.1	91558.1	64741.2	62868.2	51636.2	70443.4	77415.6	62572	66092.7	69559	74998.1
HMDB00292	565041	461734	720776	516572	583045	652974	752263	500307	554304	764807	1.17025e+06	654878	926244	880042	889268	860845	1.05116e+06	764018	1.00383e+06	829378	566283	575649	570661	514805	777807	572385	429682	607351	906113	745045	365717	345657	454820	341225	359381	353337	384599	297600	297905	364462	456061	409974	534575	514279	459328	449881	372435	593677	414046
HMDB00295	8899.5	4612.9	5907.79	5381.94	4617.47	5264.14	5386.83	9159.27	10560.7	6216.47	8752.1	5884.12	6022.41	7114.26	3115.7	8939.97	8875.49	7403.88	10451	7133.56	7713.64	9613.58	10345.2	7902.5	3348.33	13439.8	13151.5	4439.8	13259.1	7010.57	6776.64	6745.46	2960.51	4753.45	6693.72	3885.93	4625.86	3320.85	4851.23	4390.69	4839.21	2893.72	5367.87	5254.78	5600.24	4394.16	3409.11	2946.88	5424.51
HMDB00296	367953	401981	412231	327595	375796	427696	433649	407340	360949	441839	451122	323001	432194	439506	399900	433881	466815	392575	439665	406267	328565	407277	291503	313334	372358	340442	333020	366757	368204	386465	NA	1361.7	NA	NA	NA	NA	1068.61	1289.51	NA	NA	NA	NA	NA	1830.33	NA	NA	1292.18	2288.49	2318.71
HMDB00299	24769.1	11699.4	11617.1	6794.28	12794.4	21906.2	12810.3	11591.3	10498.4	16813	18258.7	9627.63	19885.8	16501.5	16086.3	23087.8	16974.4	22773.3	23768.2	23473.4	16428.4	19717.2	13033.4	23693.6	25094.4	14699.2	13098.4	15474.2	20759.9	31927.1	NA	NA	NA	NA	NA	NA	NA	NA	NA	NA	1210.08	NA	NA	NA	NA	NA	NA	1147.88	NA
HMDB00300	122326	85967.5	91704.7	118691	81603.9	148496	58900.2	73221.5	23224.8	117377	74898.7	101591	113076	77277.3	80194.6	111420	140031	87450.7	97772.7	95396.6	51986.4	56293.3	53327.4	69818.8	62543.5	80063.8	48593.4	49809.5	123310	75372.5	414549	317512	446254	338453	459923	541507	400030	454435	351368	353920	414255	328971	364060	279924	314813	646279	439038	412284	353982
HMDB00397	26571.9	11596.8	11244	11803.4	20900.4	30691.8	42007.6	18504.4	13975.5	22521.8	8787.56	14685.9	15367.1	21639.8	16798.7	7810.53	9071.61	7137.28	6342.47	6082.26	11213.9	3982.27	8116.46	6853.9	12560.8	16914.6	5111.29	6601.46	9051.75	1654.81	5242.07	10328.5	8078.17	2014.72	5134.83	3418.11	5768.36	17619.6	4790.74	4101.43	4539.38	3737.12	5052.53	16265.2	4250.7	7644.58	14076.1	12070.8	8081.15
HMDB00402	2.85997e+07	2.87456e+07	3.37943e+07	3.02223e+07	3.37207e+07	3.38769e+07	2.97336e+07	3.70851e+07	3.27312e+07	2.82975e+07	2.53196e+07	2.27958e+07	2.85258e+07	2.49055e+07	2.60846e+07	2.29931e+07	2.67607e+07	2.83775e+07	2.4279e+07	2.35796e+07	3.12755e+07	3.34813e+07	2.90104e+07	2.8349e+07	3.05089e+07	3.08586e+07	2.90264e+07	2.88254e+07	2.95553e+07	3.1549e+07	1.18171e+07	1.21422e+07	1.10244e+07	9.73158e+06	1.12179e+07	1.35441e+07	1.32978e+07	1.2986e+07	1.0659e+07	1.13925e+07	1.01626e+07	1.0953e+07	1.14535e+07	1.07715e+07	8.4207e+06	1.22401e+07	1.05681e+07	1.13501e+07	1.06118e+07
HMDB00426	317819	259558	236093	201363	230672	328140	257615	264846	314441	278145	285020	292744	161544	191247	187414	201598	206970	192668	196185	218472	247626	231517	256972	239649	227628	193406	286244	244787	221413	256813	160997	127600	175488	175751	200417	129388	170070	150758	159401	106370	289340	259355	402466	173404	147461	231147	191622	146690	152809
HMDB00446	62819.5	179909	322360	63037.8	243552	118129	39275.4	187106	29898.2	203226	74165.2	84320.5	200810	295818	97276.9	31151.3	204615	39387	162254	171024	164000	117366	104385	198587	61883.6	325138	55473.1	67510	172772	372073	469672	517785	542549	340010	211324	268043	539421	148328	309793	343787	95992.9	245869	190729	228864	197516	181004	287773	413910	225810
HMDB00462	12728.9	17934.5	12053.5	15417.5	35488.6	20105.9	17350.7	14318	19833.9	9729.63	27230.9	13549.3	27311.7	17675.1	23748.9	21550	23234.5	17086.6	20230.2	17936.7	18664.5	22022.6	24315.9	13044	12310.9	13046.4	21413.1	42253.3	20227.5	18316.6	13132.3	10964	10617.9	17826.1	11350.6	12148.5	11442.6	14197.4	11915.4	13331	12838.5	10387.3	19193.2	12939.7	9638.29	8169.72	10244.6	18895.9	7591.54
HMDB00500	713310	731688	561144	666075	641774	744368	789272	1.11054e+06	781522	713145	820825	765745	409511	536272	547956	519729	485930	529135	414130	492225	271927	333494	593161	432909	231629	354638	710649	554992	181598	134226	396441	367908	336231	403087	392170	307031	356487	380234	415483	347755	200551	177086	143183	237259	226897	326019	260319	257399	246996
HMDB00510	112134	137437	88706.7	114588	87756	116980	96539.6	129603	95614.2	116935	107361	159770	88870.6	89777	90460.4	93307	90605.6	100598	113078	100124	51104.7	49527.5	52390.2	51482.4	53825.6	28469.5	47400.7	54900.3	57463.3	50919.2	23128.6	19994.9	13218.6	27554.6	22392.9	18490.6	30910.2	23322.5	30576.3	30575.1	22078.1	22870.2	27494	20576.5	13563.1	23904.4	36941.9	21923	28925.1
HMDB00517	319789	112092	72844.7	159298	117074	123341	153453	131913	150812	122429	363168	251757	278278	206843	152217	165749	199461	232838	328435	159809	184209	150685	116334	220452	246057	103114	162479	116482	232958	198691	131835	146801	280319	111828	202286	222207	232219	171165	219843	234524	282132	153386	73439.3	247537	233810	100099	226262	298516	258277
HMDB00528	196678	197994	153347	161967	220694	170212	164570	588458	262783	64219	98563.1	220335	85480.3	64219.9	60985.3	181226	120649	96963.2	104255	108888	123635	117137	124766	64859.4	76160	80571.9	202595	109781	94330.9	82682.2	75257.2	112827	82112.4	113577	105323	83732.9	86346	81266.4	87630.9	77120.4	141000	122249	171625	130206	103498	137486	114896	71385.4	121944
HMDB00538	55524.3	17333.6	17733	32880.1	41560.3	24126.5	25171.7	29073	30542.3	33818.9	20274.1	24286.2	18898.9	20659.8	37027.6	35970.1	26690.3	27254.1	26124.3	37208.5	23134.7	36185.3	53144.6	24810.4	11535.2	28276.6	37559.9	14976.6	48941.5	20505.2	41151.4	48284.1	44754.8	34617.4	38185.7	55094.3	23919.8	23479.4	27005.1	49036.6	48410.4	42413.5	58285.6	64777.3	59251.3	65732.6	47838.6	38760.1	61328.1
HMDB00562	454166	445193	566793	378902	423349	383783	369465	422861	469332	417668	481969	468703	511460	423337	477856	435698	499442	466310	431649	446541	481790	540712	567479	545118	533064	460955	426702	517107	567148	414496	627541	638529	690390	683091	621281	720434	708704	696166	637196	672660	605423	606453	630751	580742	500570	665452	589865	623196	601138
HMDB00574	NA	NA	NA	NA	NA	NA	NA	NA	NA	NA	NA	NA	NA	NA	NA	NA	NA	NA	NA	NA	NA	2243.44	NA	NA	NA	NA	NA	NA	NA	NA	4195.44	5069.96	8407.55	3051.67	3170.24	10197.6	4581.89	9614.38	3284.61	5293.83	7858.52	5005.36	6835.83	6410.82	9191.87	11263.4	8344.34	12920.4	5558.31
HMDB00606	393280	371295	305785	371910	332415	286654	321601	295171	313368	361977	379970	343437	303755	298280	333728	297636	277907	314920	305195	316468	384668	294428	415776	370924	366055	404968	390910	414045	418485	335150	285194	314376	328172	300673	294563	281502	316385	298211	245636	310106	233709	243522	251456	293198	277650	282794	280377	272372	261083
HMDB00625	17237.6	24477.6	17994.6	17037.1	10651.9	27204.6	17510.5	15355.6	24136.8	12083.2	23273.8	17397.3	25090.7	28565.5	18426.5	17478.9	16501	15029.6	13153.9	16570.4	17301.7	9585.34	21632.2	18884.5	15463.9	8079	16754.3	15875.6	15643	18639.4	1129.29	4049.35	NA	3042.44	4342.63	NA	NA	1596.14	NA	1967.77	1614.34	2274.94	1714.13	1945.81	3952.4	NA	2155.17	2128	1530.59
HMDB00630	36992.8	32819.6	36826.5	35188.8	30370.4	42497.8	41113.4	30671.2	42961.8	40167.4	36229.5	46848.6	46987.6	34544.5	39721.5	38155.6	33557.9	32717.8	46644.7	30514.2	64731.7	73678.6	77330.5	67920.5	88305.9	63322.6	52387.7	75645.5	74966.5	70816.6	87801.2	66574.1	92764.8	81954.5	97142	86325.9	96199.3	90806.3	81563.4	82841.8	53249.6	67122	69492.6	74608	69447	67212.3	82372.5	86985.7	74166.8
HMDB00634	237197	202520	285384	260907	266678	267624	231236	334768	243881	155807	256710	191450	181230	185434	182094	254897	198869	201036	179721	221291	269440	283927	216104	210641	228839	274233	263208	234827	240457	180402	381130	310444	264728	277645	311428	294356	294173	238734	311382	237098	385944	397112	382899	348257	231048	263385	242513	230349	289315
HMDB00641	8.29878e+06	8.09159e+06	7.28675e+06	7.47185e+06	7.47854e+06	6.59991e+06	7.77015e+06	4.89415e+06	8.70245e+06	8.22987e+06	7.0719e+06	7.50789e+06	7.11074e+06	9.70582e+06	7.53961e+06	6.91705e+06	7.108e+06	7.15207e+06	9.02088e+06	8.64386e+06	5.49405e+06	7.15949e+06	7.83623e+06	8.11e+06	6.67154e+06	8.42566e+06	7.31551e+06	7.33507e+06	6.63607e+06	5.97504e+06	1.432e+07	1.53284e+07	1.38527e+07	1.35604e+07	1.35652e+07	1.46653e+07	1.45553e+07	1.11904e+07	1.48256e+07	1.56536e+07	1.28619e+07	1.39542e+07	1.41649e+07	1.46503e+07	1.5081e+07	1.35334e+07	1.239e+07	1.25639e+07	1.50735e+07
HMDB00653	16410.4	19158.6	18238.2	35269.5	8170.23	10526.8	16501.1	30148.1	12814	15875.7	25507	50721	31307.3	34286.3	42129.4	22822.9	25194.3	27871.2	41624.1	31790.4	41069.3	37520	58121	84981	27371.3	30740.5	44885.1	35953.1	20577.5	21029.5	3872.66	3298.34	NA	NA	2708.97	1664.84	5410.41	1357.4	2772.25	2421.84	NA	NA	NA	NA	NA	NA	NA	NA	NA
HMDB00669	168408	166500	144844	163085	194765	232364	172971	237947	233021	176291	183942	129303	121082	110764	132880	128310	112418	117623	104309	125783	107180	104595	132526	106072	63964.7	100949	131214	79856.2	89758.2	77441	6566.6	3155.05	5240.96	14828.8	NA	1867.43	6279.85	15135	3129.29	11766.3	7537.88	9844.81	8264.57	6705.73	2583.21	9176.75	16185.9	12885.7	13972.2
HMDB00696	44876.4	26120.8	33681.7	30471.9	29640.2	35588.5	37743.6	26910.3	28848.5	28577.2	30284.8	32340.4	46238.4	53950	42800.1	42369.4	44767.1	42284.2	34577	43172.7	41992.9	34960.2	32723.3	44282.1	30784.6	38352.7	40068.6	21326.3	40103	34821.8	87982.5	74761.7	69880.2	91641.4	59686	87720.2	80381.1	59170.1	74086.8	87440.6	62045.2	95916.1	77200	91172.8	75972.8	64796.3	72078.7	69640.3	69491
HMDB00707	1963.09	NA	NA	NA	1776.42	2193.68	3030.27	NA	2639.89	NA	1501.56	1601.04	NA	NA	1094.6	2785.93	NA	2395.82	NA	2111.17	NA	NA	1555.73	1927.38	1955.26	NA	1860.91	1644.65	NA	NA	7562.39	9157.06	10484	8938.98	9950.87	10964.7	9267.07	7183.53	8487.27	6057.79	9266.75	3802.48	11354.9	10703.2	9718.27	7539.26	7543.23	5073.91	6801.92
HMDB00715	124836	229150	164275	135714	147670	162388	163591	230546	207006	144962	149088	126818	137851	114570	104809	134273	114277	254412	89737	120575	114420	130357	174183	114110	141166	151482	129265	156895	152826	132330	16752.3	10633.7	17489.9	11582	14080.2	11908.5	11202	13094.3	12820.5	14856.5	15849.9	25220.1	10369.3	8644.66	10181.8	14642.3	14544.5	10297.3	10676.4
HMDB00719	NA	NA	4104.19	NA	NA	NA	4375.79	NA	NA	NA	3496.41	2136.98	NA	2841.8	1639.23	1520.61	1959.7	NA	3063	1161.37	3335.25	2039.29	2840.74	3083.04	3024.96	1553.97	2252.43	3039.69	2041.28	1659.65	3198.19	2999.11	4043.22	3380.39	3104.01	2933.33	2381.2	5072.95	4580.65	3849.4	3484.45	5562.48	4897.27	3871.54	2067.39	1913.52	NA	3746.28	3441.51
HMDB00725	4680.56	6457.22	7959.51	7769.3	4259.83	6822.28	11805.6	6475.47	7164.95	3792.22	10009.8	10424.7	7883.12	6568.69	8388.23	8365.56	9391.05	6334.37	6107.15	7067.91	7414.11	10513.8	7210.49	6586.99	11026.4	8050.13	7436.6	12479.3	8483.73	8119.09	17662.5	17481.2	16355.4	16863	20264.3	19180.4	30126.2	16451.9	16791.9	18552.9	17133.7	10025.3	10825.5	10778.6	12697.6	18423.2	11640.6	20520	12179.9
HMDB00734	16734.1	22283.7	22980.1	23726.7	16032.6	28109.6	20644.2	30146.6	30996.4	19920.7	34963.2	17756.4	14084.9	7240.65	7759.46	7937.29	25184.8	12882.9	20490.8	15792.4	12932	5995.84	26453.5	9878.76	9434.5	4522.22	20665.4	13346.6	11701.9	6243.41	7094.45	3663.03	8660.77	8684.94	10100.1	4703.87	12671.9	5084.48	10837.2	5611.44	4625.77	13691.9	9995.25	5813.5	8459	6819.47	9364.17	7752.18	9012.03
HMDB00738	6850.42	7974.62	5907.93	3225.68	NA	NA	1874.08	4790.34	2608.77	3048.72	1513.08	5782.13	4661.63	6435.77	3720.58	2830.89	1606.5	2097.65	6893.13	4329.29	6968.78	2083.63	4359.05	3495.91	2493.13	3410.8	2143.54	4964.42	3556.95	3271.5	4537.87	9305.53	5985.99	7539.46	10105.8	3542.14	9819.33	4707.28	10827	10151.4	6352.31	6893.53	9792.56	13245	6370.91	5011.96	7165.81	6718.09	10143.1
HMDB00742	3885.3	4255.08	4369.09	2981.63	6390.2	2200.43	3366.85	NA	4148.71	2415.62	4500.86	4263.16	4015.03	5507.8	2551.74	5073.29	3897.28	3282.15	2887.16	3468.15	1661.41	3263.04	3058.69	2701.11	1243.97	4038.34	2065.8	2100.6	2206.24	2753.83	8076.89	8971.68	4886.82	6290.9	8338.51	8165.34	3234.28	4947.13	5552.75	4479.95	9110.04	5793.56	8301.03	5665.06	5756.09	4145.44	5029.29	5752.5	6706.47
HMDB00744	5.61575e+06	6.0614e+06	4.35304e+06	5.63069e+06	5.27103e+06	5.68655e+06	5.07757e+06	4.24079e+06	6.28209e+06	5.19315e+06	4.50828e+06	5.93589e+06	4.22236e+06	4.90401e+06	5.30222e+06	5.47164e+06	4.25197e+06	3.98105e+06	4.45685e+06	5.13482e+06	5.09473e+06	4.41564e+06	7.40692e+06	6.27147e+06	4.36597e+06	5.07126e+06	6.41149e+06	4.8284e+06	5.00388e+06	4.73857e+06	1.99275e+06	2.26187e+06	2.31818e+06	2.84097e+06	2.56124e+06	1.95625e+06	1.86181e+06	1.95704e+06	2.16553e+06	2.04237e+06	1.61874e+06	2.11501e+06	1.90886e+06	2.0508e+06	1.85525e+06	1.72196e+06	1.7222e+06	1.63938e+06	1.81589e+06
HMDB00746	10152.2	40717.9	14491.9	11474.2	8634.05	24600.2	23857.3	10212.4	17953	41044.4	22603	15976.1	6306.64	2253.72	10926.8	13870.4	2507.66	7445.28	5101.28	4126.07	12392.1	10824.2	4958.34	2558.38	8781.85	8642.95	6631.99	15408	9884.94	6800.99	30410.2	62290.7	62517.3	51163.1	64825.6	61761.2	49186.3	45429.7	66231.6	50457.7	32258.6	55828.9	43378.9	55886	47067.8	58690.5	45842.2	47560	50526.3
HMDB00766	1.33939e+07	1.30592e+07	1.47627e+07	1.31882e+07	1.6409e+07	1.55926e+07	1.49194e+07	1.34699e+07	1.47265e+07	1.56441e+07	1.58207e+07	1.61855e+07	1.35095e+07	1.52698e+07	1.45734e+07	1.60187e+07	1.4878e+07	1.44424e+07	1.46436e+07	1.54883e+07	1.71036e+07	1.72757e+07	1.68711e+07	1.74496e+07	1.80207e+07	1.63234e+07	1.64971e+07	1.90182e+07	1.67088e+07	1.8033e+07	6.84771e+06	7.10632e+06	7.20717e+06	6.82771e+06	6.81141e+06	6.69723e+06	6.4688e+06	6.57635e+06	7.04455e+06	6.08889e+06	6.95752e+06	6.96867e+06	7.25518e+06	7.06744e+06	5.96425e+06	6.9789e+06	6.71981e+06	6.22311e+06	6.31275e+06
HMDB00779	15860.9	16453.1	11129.5	2237.89	13702	13323.7	18030.5	15373.4	10304.4	11827.7	6386.74	8558.05	8308.19	18870.6	13446.3	8653.16	21061.7	12527.2	15175.6	11435.3	9614.74	8833.22	8662.2	10573.9	12066.4	9432.74	9562	14784.9	12548.9	4601.66	5626.56	6693.89	5717.85	4938.04	10138.5	2599.44	4565.84	3197.84	8442.6	5586.55	5913.45	8937.48	14929.6	9086.48	7001.16	7415.26	10619.9	8017.61	8539.94
HMDB00807	99583.6	77841.3	33719.8	53361.4	69463.8	28739.4	49280.4	53881.8	85377.1	87251.5	22119.9	14524.3	37110.8	38783	50319.9	34957.6	17329.5	46639.1	59088.4	50110.4	30440.8	47762	46464.8	46724.7	43217.2	37788	50094.4	22994.7	63442.8	42430.3	75570.7	89276.6	34049.2	28297.5	37416.5	44220.5	65773.1	44737.2	37561.9	66437.7	29698.7	36200.1	34810	59832.3	73052.6	2129.93	29182.6	33302.7	52118.6
HMDB00828	18015.2	32640.1	23896.7	16129.1	19892.4	35535.3	11426.1	19407.9	13198.5	24868.3	17249.1	19486.1	19674	18465.7	18765.9	15715.4	18256.2	16540.4	21981.1	15209.8	20829.8	19984.9	27748.9	22554.8	17771.2	13901	18187.1	23356.2	23814.9	17153.2	11775.9	14547.4	19159.5	10637.6	14486.7	16788.7	11408.9	12450.9	18021.9	14997.1	13109.3	11138.5	13733.4	11098.9	8404.42	7233.3	10773.1	10313.2	10379
HMDB00870	21904	19111	40724.7	26455.9	28352.5	25403.8	24772.7	23188.5	24150.7	26619.2	29188.1	26445.5	24972.3	33200.8	31676.3	30593.4	23144.3	29835.4	28244.8	29480.6	39015.8	41733	47077.3	44391.2	49319.8	45792.9	40480.3	60581.2	53354	52429.1	102988	92476.6	112657	85238.4	121446	92746.1	101924	97158.8	85297.4	111594	83326.7	68558.5	68343.1	98666.2	94966.8	88902.9	90486.3	92466.3	96794.4
HMDB00881	93867.8	170634	94509.4	77318.8	65603.5	186567	108224	133704	105241	77276	115689	102103	115911	69451.2	47876.4	44922.6	83562	139065	36535.5	45597	97669.8	52661.6	140145	29290.4	31975.4	89452.2	88008.2	62089	63444	53622.4	7287.07	6289.36	8389.87	6276.68	13033.2	4078.35	3747.45	9783.8	2581.82	3934.1	9832.9	7512.55	7933.97	3419.8	12250.6	3960.31	9654.86	4603.54	4347.39
HMDB00883	18095.5	12873.8	14351.2	10384	11011.3	9332.89	6956.04	8800.2	8673.67	11666.7	18757.5	13613.3	13330.4	17409.5	20246	10869.4	10007.3	10409.8	14595.5	20225.4	15635.3	12835.6	12434	12904.3	13500.5	15472.4	12822.3	11648.3	11382.2	12356.4	32283.5	31439.7	19098.4	24346.8	19472.7	23681.6	25985.8	22933	24563.8	21609.7	11495	13661.6	18363.6	19764.7	20230.6	16145.5	12840.6	18852.3	20996.4
HMDB00895	13611.3	13491.4	11278.1	9172.94	11658	5251.8	15815.3	15631.7	11335.2	11021.3	19403.1	18940.5	18641.5	20335.6	15578.6	10222.8	19575.2	16185.1	15542.1	19523.9	14205.4	37365.2	20595	25620	28965.8	20182.6	28398.3	24254.7	34737	19381.6	19803	27575.2	25077.3	32638.5	28979.5	27464.9	34276.1	27401	28360.4	33109.3	30436	29665.3	27711.7	23861.7	26360.6	26243.1	28809.9	22689.7	25076.1
HMDB00902	2.18267e+06	2.30084e+06	2.46703e+06	2.2703e+06	2.39511e+06	2.35436e+06	2.14396e+06	2.35777e+06	3.17259e+06	2.30308e+06	1.99462e+06	2.03472e+06	2.13839e+06	2.00106e+06	2.26993e+06	2.04868e+06	2.19024e+06	2.19177e+06	2.33401e+06	1.84443e+06	2.16588e+06	2.26193e+06	2.17831e+06	2.18656e+06	2.18881e+06	2.25488e+06	1.97787e+06	2.04953e+06	2.16675e+06	2.51862e+06	3.66314e+06	3.11928e+06	3.66521e+06	3.49774e+06	3.28008e+06	3.47548e+06	3.33169e+06	3.55847e+06	3.74918e+06	3.72431e+06	3.39445e+06	3.25504e+06	3.29042e+06	3.58642e+06	3.42846e+06	3.39851e+06	3.73571e+06	3.28635e+06	3.41847e+06
HMDB00904	92309.7	28826.3	16800.8	29308.2	21064.1	28662.3	21996.9	19337	19808.9	25385.7	24911.6	25043.1	21391.7	15138.2	24459.9	23304.9	13613.4	13022.1	18387.8	17631.5	20345.9	20385.5	18139	19846.2	14856.5	15708.2	33689.6	21549.3	17192.1	10381.2	38665.5	29558.4	46680.9	33681	33774.3	38242.8	25710	31325	37420.1	25014	23539.1	24637.1	20606.8	30089.3	20695.9	25889.2	29546.4	28350.7	22616.6
HMDB00905	10012	7092.84	8220.19	11658.4	6037.92	4385.06	4713.13	NA	4149.4	4485.51	6005.55	18952.3	8225.24	5684.46	7297.11	5832.03	5499.9	16778.2	18378.4	5973.41	7295.93	7749.75	4588.41	8092.9	6575.61	6733.22	4757.06	13073.5	19050.3	7008.25	17102.9	28044.7	16205.5	19263.3	14836.7	22206.1	22202.4	15871.7	16115.4	10291	26822.6	15509.4	17354	13427.3	14495	14941	12391	11607.8	23640.1
HMDB00929	292897	280320	284497	245630	229637	168552	256004	125961	205522	321700	309133	390692	354966	457317	401834	335531	336262	304231	456193	416581	264934	244486	394777	345331	269855	244996	293490	328883	317582	221392	348022	332253	279190	296201	283218	322667	337174	322042	344843	313324	636658	430605	374879	525838	507754	451847	400777	423915	463202
HMDB00935	2781.05	NA	NA	NA	NA	NA	NA	NA	NA	3106.28	NA	NA	NA	NA	NA	NA	NA	1742.12	1261.17	963.583	3126.35	1223.71	1966.56	NA	1954.81	1795.55	NA	NA	1739.05	1106.81	17921.7	18865.4	15326.1	21484.2	19905.4	21264.8	22510.6	20410.6	16959.3	17253.2	14319.5	14064.5	14353.3	12844.1	12021.2	14941.6	13289.9	12602	19046.7
HMDB00939	63559.9	62086.4	93540	83999.9	70329.6	70627.9	78454.1	77041.6	86374	101124	161416	125210	136701	112985	101066	105003	128987	136129	117850	149482	61501.2	82184.8	60965	61083	86194.2	84157.4	53159.5	258712	79757.2	80795	62288.9	42143.2	61391.7	66164.2	57907.4	69388.6	65066.6	64082.7	52132.3	46756.2	121623	97597.8	120419	82879.1	94277.3	109854	72915.7	108966	131797
HMDB00960	328330	213335	164114	189254	270402	188625	217340	299219	266026	317526	247565	304402	189619	199610	277089	311675	322047	288017	272205	286906	220116	248820	332440	263705	170397	207975	323961	161028	339168	203562	NA	1349.32	NA	NA	NA	NA	NA	NA	NA	NA	NA	NA	NA	NA	NA	NA	NA	NA	NA
HMDB00991	1.23787e+06	1.44742e+06	1.3884e+06	1.08794e+06	816996	1.13114e+06	934865	1.68507e+06	546154	635740	2.36942e+06	2.19037e+06	1.2216e+06	2.14904e+06	1.66577e+06	2.36093e+06	2.11396e+06	2.33223e+06	1.35336e+06	1.12436e+06	1.57326e+06	1.33574e+06	1.87735e+06	1.96855e+06	2.80635e+06	1.25223e+06	1.65e+06	1.8561e+06	1.94492e+06	2.40367e+06	1.47666e+06	2.09821e+06	2.73293e+06	1.85642e+06	1.39613e+06	2.27036e+06	2.28231e+06	2.90549e+06	1.21091e+06	1.31331e+06	2.54704e+06	1.96573e+06	1.672e+06	1.25723e+06	2.61106e+06	2.51853e+06	2.77464e+06	3.20719e+06	1.4202e+06
HMDB01016	NA	3193.11	NA	2092.26	3906.69	3070.35	4377	2694.24	1885.15	NA	NA	2670.04	NA	2835.47	NA	NA	1241.69	1724.36	NA	NA	NA	NA	1092.77	1514.13	NA	NA	NA	NA	3241.25	1657.85	1148.34	3166.97	NA	1537.38	NA	2388.91	1597.78	1561.45	1383.78	1773.32	NA	1651.51	2105.55	1553.11	4415.58	1156.49	NA	NA	1530.01
HMDB01031	68367	83078.1	78930	52176.8	128087	75994.1	34001.8	52399.2	62818.3	112342	57552.3	80285.5	51152.2	47280.4	75808.3	70641.2	48466.6	70528.3	22137.5	74801	38243	64151.6	43936.4	52245.9	71117.4	44798.8	57911.2	64815.4	48951.8	68602	4127.78	4134.85	3930.16	1383.99	4233.05	1360.61	4121.04	3453.44	2511.24	8357.06	2571.08	4634.17	7582.34	3836.73	6244.35	5423.29	4928.01	3525.37	4198.93
HMDB01044	NA	2482.09	2826.23	2091.35	NA	NA	NA	NA	NA	NA	NA	2136.72	NA	1243.38	NA	NA	1959.06	NA	NA	1737.72	NA	NA	1747.85	1734.05	1244.2	1570.7	NA	2106.5	1020.35	2398.43	3274.59	2248.16	3288.14	1735.82	2350.76	5460.28	3158.22	4221.98	2987.92	3479.97	1621.67	3290.1	4774.03	4283.95	2471.78	2108.73	4303.72	2455.08	3230.66
HMDB01058	470001	360489	207688	292489	490081	158778	195160	353315	608206	695746	52237.1	58508.4	114948	146301	387807	75600.6	42070.4	161015	262587	190973	36405.7	32116.2	78085.3	73077.6	33893.8	15473.7	57085.2	39899.7	74925.3	25704	8396.36	9909.99	3736.99	2457.28	5855.39	2524.2	4344.25	3497.89	2318.76	9025.22	7347.14	3890.55	2469.38	8525.09	8425.49	5189.26	10363.2	4420.31	8397.68
HMDB01096	1.40849e+07	1.50206e+07	1.50794e+07	1.36914e+07	1.30731e+07	1.56056e+07	1.37795e+07	1.25266e+07	1.53179e+07	1.46983e+07	1885.93	1.40071e+07	1.52097e+07	1.50158e+07	1.59548e+07	1.53295e+07	1.54452e+07	1.53153e+07	1.68319e+07	1.64582e+07	1.09325e+07	1.08282e+07	1.12916e+07	1.15273e+07	1.21526e+07	9.81868e+06	1.15175e+07	1.08359e+07	1.23824e+07	1.18796e+07	1.3299e+07	1.24195e+07	1.26861e+07	1.17629e+07	1.15864e+07	1.3542e+07	1.22193e+07	1.28132e+07	1.10586e+07	1.25227e+07	9.39607e+06	9.00702e+06	1.03391e+07	9.23139e+06	1.00597e+07	1.09935e+07	8.60201e+06	1.0678e+07	9.18407e+06
HMDB01107	1668.78	NA	1810.58	NA	NA	NA	NA	NA	NA	NA	1742.88	2134.3	1562.98	NA	2524.62	NA	1246.55	2394.71	3423.55	3082.19	2111.65	2044.1	NA	2889.35	2132.33	NA	3515.98	2799.44	NA	1657.59	5115.89	4798.95	2244.8	3084.67	3448.31	5065.81	2334.07	4946.98	2716.2	6507.83	6856.96	5028.02	5363.21	NA	5609.12	2762.21	2511.41	3413.23	5260.05
HMDB01112	191764	323177	218322	178329	153937	167141	295290	355552	219634	134275	125956	93762	193718	149098	259639	122887	75413.9	302340	224762	231654	63148.1	94103.4	153632	166127	82018.8	108158	175327	34976.1	117720	92275.9	88237.5	128368	48487.2	56213.9	66684.7	103802	107013	80620	88288.7	92239.5	53389.1	43442	47959.4	90461.3	94150.3	30991.9	67022.6	88705.8	78672.7
HMDB01127	NA	1778.09	NA	1778.02	7170.94	NA	5711.54	3759.65	7157.41	4756.12	NA	NA	1404.39	NA	3123.62	5607.11	2838.91	NA	2268.02	4817.59	4059.81	3883.17	3394.16	3103.89	3163.41	2017.14	1512.54	1880.83	NA	3123.14	1451.03	3084.65	3119.37	1735.07	3658.63	6012.29	2837.71	1424	1687.66	2449.08	1595.17	3249.29	4520.12	2727.74	3524.52	5498.8	3690.76	3304.11	1344.24
HMDB01138	11694.4	9547.19	8988.81	9579.36	10274.5	12626.9	8404.6	7517.51	11675.1	7592.61	8467.25	7988.56	6780.84	13629.8	9666.6	7282.7	12753	7992.82	12434.5	12078.5	16244.9	15267.3	15731.3	11348	16152.5	6214.39	15185.3	17382.7	14084.8	10498.9	15483.5	22101.9	16448.4	23690.2	20339.6	27310.3	22734.1	15724	22824.1	18594	12414.6	11796.6	16966.8	13287.7	10970.7	12597.6	13343.3	18295.5	13435.4
HMDB01185	NA	NA	32644.5	NA	NA	NA	27392.5	NA	39206.4	32805.2	NA	NA	NA	NA	NA	NA	NA	NA	47530.4	32544.4	NA	31751.4	NA	48633.7	NA	23997	38695.9	NA	NA	NA	77603.7	85912.8	97567.6	89640	94957.7	105142	91531.1	82687.1	82564.2	115924	49192.7	53358.1	49489.7	58755.9	58098.7	58222.4	69322.4	65625.6	60571.2
HMDB01186	203856	286698	181524	312118	325390	164347	246627	421368	315933	717881	141060	182852	117658	206176	187340	85628.3	82245.9	297811	111448	193720	95121.2	67498.6	155252	85768.3	223322	141710	217084	151665	66409.7	361734	39276.2	63189.1	59072.5	289086	300618	35030.2	44098.7	137514	324459	131823	50588.6	153478	187778	168494	210188	19341.9	92838.9	160847	245106
HMDB01202	NA	NA	2569.62	4489.02	NA	NA	NA	NA	NA	NA	4503.93	NA	NA	2666.23	2189.73	NA	2306.31	2394.7	2161.76	1926.59	NA	1631.19	1529.35	1733.74	2310.97	NA	NA	1400.07	NA	1845.04	2742.63	2999.19	5049.41	4747.03	2714.16	3886.87	6013.14	5425.22	3288.15	3480.69	NA	2895.34	3426.91	2917.81	2308.06	2987.83	2152.23	2945.52	3271.34
HMDB01209	24784.7	19878.9	26211.8	14927.9	23487.5	35472.8	16147.6	26428.2	20784.4	13994.4	20789	17534.1	24651	17935.8	22415.2	23059.6	18450.8	18153.1	12792.1	23115.2	15839.5	19804.3	28046.9	15800.5	19532.1	22217.9	18833.6	23956.3	22263.9	20092.3	7099.01	10052	6793.97	12362.1	10314	6105.18	12332.4	12613.1	13516	14377.4	11698.7	10506	11783.6	10898.2	11542.9	11927.7	12212.8	9656.4	9523.88
HMDB01227	NA	NA	NA	NA	NA	NA	NA	NA	NA	NA	NA	NA	NA	NA	1279.91	NA	NA	NA	1441.18	NA	1459.05	NA	NA	1348.72	NA	NA	NA	NA	1360.15	NA	5315.45	6254.1	4005	3802.46	2172.04	3747.34	2621.3	5267.93	2252.51	5449.47	NA	2177.39	3002.12	NA	5270.82	2459.06	3053.33	1800	4915.31
HMDB01248	2502.38	3548.57	NA	3288.58	2841.02	NA	3703.07	NA	2639.19	5176.06	2251.62	2135.05	NA	1420.08	2188.64	2789.71	1596.8	1959.66	4324.61	4624.83	4168.91	9585.19	3277.53	3275.53	5688.56	2917.86	3516.57	NA	4081.48	2581.61	34533.5	28195.6	42142.8	33842.2	46685.7	37050.9	23136.6	48368.9	41400.8	42225.8	30050.6	26882.3	29564.8	31718.7	28823.2	25311.2	25137.6	26845.3	24489.2
HMDB01252	33757.4	35806.9	45882.2	38397.3	31813.6	45918.9	36464.1	26304.6	42391.2	40390	55387.8	46340.1	43428.3	55945.6	60917.4	49710.3	29708.7	50166.8	39660.2	33450.2	38718.6	36518	33965.1	27424.9	37345.8	36160	42411.5	38765.2	41578.8	35303	28980.2	29440.7	33521.2	31615.6	34196.9	31643.2	25773.8	28434.7	25401.8	29390.8	62352.5	41581.3	39809.8	46983.1	45143.5	47380.1	43967.7	44356.6	50504.3
HMDB01257	234557	94081	74232.6	103780	160840	138493	109220	143440	311753	129449	120035	69135.5	85365.4	54040.7	128662	82962.3	58976.8	99647.9	50419.9	81014	66833.5	67768.5	60576.8	82237.4	95584.4	101338	63789.8	46436.5	53309.6	133102	622133	891169	944318	3.34977e+06	1.87975e+06	454715	994090	1.21663e+06	3.21616e+06	1.75736e+06	1.52797e+06	923254	2.46158e+06	2.13417e+06	1.80358e+06	448748	996614	1.73981e+06	1.98238e+06
HMDB01270	10287.5	6548.25	4934.97	3685.52	8542.49	11552.3	4982.51	7509.11	5070.25	21027.6	11757.6	13210.6	8102.84	5179.64	8574.74	7691.21	8419.96	11833.7	11466.8	6255.78	8978.71	8190.14	3593.84	12621.3	6862.12	6869.51	10784.6	3918.1	9166.97	7939.56	1482.99	3064.75	2440.04	7044.77	4885.56	6093.68	4815.81	6838.97	3217.59	2853.63	5968.4	2446.07	7821.52	5837.82	5001.39	5932.63	5531.08	7601.05	6248.83
HMDB01273	8057.77	NA	NA	5677.95	11689.3	5682.2	NA	NA	7922.71	12427.8	2004.48	1601.69	1405.59	2272.63	2931.89	5509.33	3548.41	2880.44	1265.91	2387.36	5420.41	3668.94	3067.98	3838.65	1777.22	NA	3927.03	3213.46	4421.28	2950.85	11775.6	7199.33	10593.9	3993.28	7177.72	7076.39	3391.9	15841.6	5025.35	9232.23	12907.1	8881.56	16501	11104.1	13311.7	27342.7	7723.47	4419.01	9004.39
HMDB01310	3.01227e+06	2.79166e+06	2.5403e+06	2.56928e+06	2.90802e+06	2.46705e+06	2.59469e+06	2.52591e+06	2.53782e+06	2.85218e+06	3.07296e+06	2.75052e+06	2.5284e+06	2.72165e+06	2.51177e+06	2.65911e+06	2.57512e+06	3.01147e+06	2.68324e+06	2.8807e+06	3.16992e+06	3.27976e+06	3.58134e+06	3.05824e+06	3.36143e+06	3.14434e+06	3.32231e+06	3.63469e+06	3.37486e+06	3.24057e+06	2.9028e+06	2.58899e+06	3.16213e+06	2.99391e+06	3.08273e+06	3.05726e+06	2.85542e+06	2.71618e+06	3.14681e+06	2.8441e+06	2.6481e+06	2.62404e+06	2.79291e+06	2.73431e+06	2.60274e+06	2.7876e+06	2.61978e+06	2.68696e+06	2.50413e+06
HMDB01316	4725.48	4257.52	4625.84	6277.22	4585.49	4415	2975.2	11313.7	2260.3	3796.59	3749.72	3468.96	1998.45	3020.05	5818.05	4817.74	7441.9	3712.98	9909.75	6744.88	2099.6	3668.31	2815.05	2889.51	6037.49	2917.18	3928.43	2334.37	4382.67	2767	NA	NA	NA	NA	NA	4579.24	NA	1276.78	3107.11	3329.45	1613.04	1654.07	NA	2109.35	NA	NA	NA	NA	NA
HMDB01321	27761.6	49302.3	29939.4	24746.9	49667.2	29135.3	31732.5	37415.8	52155.5	67663.2	20725.7	10745.9	16569.8	15830.2	29014.7	19129	11140.6	20904	21472.4	25690.2	8735.83	5465.89	18938.5	16520	21712.5	12933	15040.1	7705.62	15598.1	10410.3	7049.32	7802	3134.84	5527.64	5971.13	3048.56	3251.11	5267.44	2253.03	5750.81	9683.58	5792.14	14140.2	10131.1	9603.74	2303.86	5387.92	8347.01	3060.76
HMDB01367	78384.3	40757	86531.7	60030.3	66706.8	60859.5	65654.1	74226.5	50559.2	75242.7	53050.9	47586.5	46716.8	51815.8	46575.9	78834	62375.6	36666.5	86841.5	45665.8	41946.4	62083.2	37244.5	59875.6	88509.4	48855.7	46406.1	43035.4	53471.1	50273.3	1774.15	1950.62	5444.26	2858.55	1627.91	1237.73	4650.07	15033.9	3004.46	3180.97	NA	3722.08	2324	5166	2635.07	2097.91	1975.23	3913.48	3099.1
HMDB01372	39434.9	30923.8	25770	26904	38703.9	36851.5	34294.7	24782.2	29402.5	42659.5	48786.9	38473.2	45162.6	43585	34488.9	31441.6	40735.6	38658.6	39253.9	38988.8	56534.8	45453.7	38774.7	50813.1	53133.4	49677.1	52438.9	26174.6	49861.5	58191.4	NA	NA	NA	NA	NA	NA	NA	NA	NA	NA	NA	NA	NA	NA	NA	NA	NA	983.324	NA
HMDB01373	13626.1	4966.98	7710.45	1793.6	7104.47	7020.63	6396.57	3232.5	6788.1	9318.75	11010.7	12813.7	13048.1	20430	10544.5	17498.4	16854.8	21555.5	24500.7	21566.8	13544.7	14686.7	13503.1	22529.3	14751.9	15482.2	24305.3	5834.47	14463.9	16603.1	22244.3	12509.7	19447.7	13393.1	23993.4	27892.1	16518.4	18732.5	14701.2	21423.5	8703.54	10731.7	15002.1	16136	18603.6	13185.1	23139.2	31346.2	12395.8
HMDB01389	9695.52	15240.5	5651.72	11788.4	6719.83	11714	8590.52	NA	10029.9	9044.42	15745.7	16975.7	21184.9	17590.8	17320.3	11722.3	15527.2	15998.8	22103.4	20596	7859.97	7389.61	7719.09	11266.2	9265.4	6283.27	14873.3	14907.8	9504.15	8587.55	17813.6	16309.9	5407.59	12400.1	9015.19	10120.2	12526.8	6898.88	15166.7	16273.3	17276.8	23482.1	30211	28172.4	31532.4	18664.4	23044.9	17873.9	29831.1
HMDB01392	127572	74322.4	42135.9	99859.5	77621.7	113232	202964	59966.3	182748	62786.5	75457.2	127322	48286.3	30342	54128.1	48819.5	35291.1	49025.2	50403.9	105234	24550.5	17806.4	43197.2	29293.7	27227	20408.1	25968.7	42716.6	68282.3	26675.2	58641.9	284349	44260.5	46301.1	29743.2	179850	41110.4	48208.8	67057.6	57348.2	67607	99896.4	78360.4	36387.3	29338.9	59394.3	25078.3	43260.2	34618.2
HMDB01397	1.40242e+06	1.11216e+06	1.35536e+06	1.54535e+06	1.23757e+06	1.36881e+06	1.60161e+06	1.48722e+06	1.5814e+06	1.62959e+06	1.4521e+06	1.70019e+06	1.45503e+06	1.33197e+06	1.42757e+06	1.54993e+06	1.47093e+06	1.77399e+06	1.63863e+06	1.78235e+06	1.50664e+06	1.57928e+06	1.55844e+06	1.15703e+06	1.15141e+06	1.27604e+06	1.48758e+06	1.06468e+06	1.40835e+06	1.04271e+06	3.54165e+06	3.84828e+06	3.93836e+06	3.6951e+06	4.09718e+06	3.71437e+06	3.83454e+06	3.99042e+06	3.81651e+06	3.37047e+06	3.36153e+06	3.08856e+06	3.21473e+06	3.10948e+06	3.26497e+06	3.23881e+06	3.41537e+06	3.502e+06	3.35761e+06
HMDB01401	2.80497e+06	3.77867e+06	2.51008e+06	2.42279e+06	2.9523e+06	2.08595e+06	2.48855e+06	2.88861e+06	3.3985e+06	2.93686e+06	1.74699e+06	1.53479e+06	2.27989e+06	2.25014e+06	3.39446e+06	1.79119e+06	2.1944e+06	2.21973e+06	2.14802e+06	2.29678e+06	2.11147e+06	2.18495e+06	2.382e+06	2.54631e+06	2.0053e+06	2.07196e+06	2.45074e+06	1.94948e+06	2.34851e+06	2.0672e+06	29167.7	38321.1	37540.6	21343.2	27334.4	29482.9	23013.1	27914.6	26691.4	27334.6	30532.5	22321.9	22279.8	25097.2	32225.4	27859.8	29864.1	33557.7	27032.9
HMDB01406	144045	82681.9	78958.6	73835.4	110825	139198	151157	57683	105322	110631	203691	299477	303041	485351	218818	263096	512229	347604	337302	219840	250312	436564	395711	222539	382478	403154	516777	357041	469311	362892	838329	723048	1.06083e+06	642328	658134	1.54097e+06	635058	312416	656084	766401	138714	314047	366989	525696	367064	417556	487606	535996	494649
HMDB01414	11497.6	24803.3	4966.06	6637.48	3384.44	15659.9	5101.26	12267.3	7222.74	5969.57	10072.1	NA	3052.69	5810.59	2613.21	8196.09	6873.78	6232.59	2518.27	4859.51	8190.95	3092.52	NA	NA	4225.22	3636.39	2576.59	5886.49	882.195	1069.33	37705	47213.1	21312.7	30934.6	25604.3	46289.9	14679	11651	16708.1	8271.62	106889	19829.7	49791.3	21011.5	20417.5	46749.8	11036.1	31965.5	17850.8
HMDB01423	NA	NA	1285.22	NA	3197.02	2193.85	NA	NA	NA	NA	NA	NA	NA	NA	NA	NA	2484.08	NA	NA	NA	2084.82	1631.79	NA	1156.21	NA	NA	NA	NA	3401.4	NA	57763.8	47456.3	54701.8	54234.5	56952.6	69687.2	37114.3	38022.2	42539.4	52906.3	46184.7	43373.2	65766	67876.6	83679.7	56393.3	69809.2	94622.1	53677.2
HMDB01440	54070.4	24800.3	16978.2	28399.2	40818.3	36408	29628.5	18856.3	27871.8	41338.3	24529.4	19936.1	11868.6	18484.8	28102	36828.6	25932.5	27601.9	27374.8	29530.7	26449.9	34348.9	53785.9	38156.2	20439.1	30072.1	28662.4	9569.41	48125	12374.6	51495.7	61804.3	49297.6	29149	54644.3	47903.1	36232.2	26816.3	29790.4	56300	45743.7	51119.3	80319.6	72133.4	71296.3	113967	41285.3	46315.5	67204.2
HMDB01473	191191	410518	283055	220676	140887	214651	332842	372345	384393	164869	171196	138251	241891	161013	320690	172841	102762	362334	279120	315060	91497	113180	211066	198815	85567.9	135763	249837	49763.5	158729	113774	99692.8	137326	62588.9	71854	85235.4	103490	100174	73852.4	79006	113198	59524.5	56922.3	83721.1	89571.9	119074	52801.7	85096.6	89980	85181.7
HMDB01487	13629.1	4257.46	14388.6	11359.8	12075.5	16671.9	14231.3	7004.81	6395.72	18291.7	16015.3	23224.6	12445.9	13681	14229.6	14433.3	15258.6	23080.4	14595.5	14065.2	23973.5	13181.9	10605.8	15801.8	15463.3	17729.4	16345	10739	22448.6	20475.8	95534.6	104397	40580.1	53994.2	54584.6	104630	94326.4	92744.7	69140.4	90859.3	74619.8	60961.8	80764.5	96321.7	100057	62590.8	55855.2	96574.4	63093.3
HMDB01488	48781	32111.5	9793.09	38461.6	52678.5	72251.3	79145.9	60490.7	24739.9	40571	19947.8	29605.1	18078.1	24677	29366.3	41146.5	10779.5	14032.5	27682.4	18411.3	7505.89	5481.86	21138.6	14645.8	8292.57	18755.4	31781.4	31672.2	20814.2	6953.89	7620.17	9602.73	11949.8	20020.3	9192.53	18634	19618.8	11666.2	10979.5	12642.3	17726	22850.8	12893.1	20514.8	12207.3	39357.8	13281.8	12088.3	12200.6
HMDB01494	15827.4	19878.1	26338.7	23808.2	14271.6	34748.9	32981	16584.6	20392.7	38091.5	25138.6	15431.9	18592	29443.7	29038.5	40076.4	43617.1	23283.4	22459.4	22673.3	27574.1	19165.6	16559.8	16032	15659.6	22668.9	13385.8	14271.9	17362.8	10948.5	19608.2	21787.3	24504.6	15869.5	31304.7	18212	25954.8	15233.8	19406.6	22611.4	17807.4	10869.8	15023.8	26534.4	21912.7	31764.2	16303.8	22033.3	15719
HMDB01514	38240.7	34024	73409.2	41901.7	42648.1	116253	46959.7	87180.8	52372.4	65171	17252.1	60734.2	40992.1	24839.9	31102.9	27342.1	21519.7	27378.8	6720.43	18343.2	27569.5	57186.5	39209.6	43318.3	28857.3	35181.7	14743.7	25236.7	8066.1	8212.99	70390.5	37463.3	17583.1	NA	7398.67	32200.3	28318.2	18475.9	17582.7	7948.19	59023.8	17420.8	21037.1	18073.4	13254.2	81774.2	38747.1	48340	16952.5
HMDB01517	2225.34	NA	NA	NA	2140.38	2193.83	2363.47	NA	NA	NA	2501.88	2669.23	3011.23	1781.1	2371.98	2281.52	1774.57	3701.13	2526.22	NA	1250.8	NA	1965.9	4001.16	2132.33	2693.01	2068.84	NA	1360.66	2766.44	4365.14	5099.26	2380.96	4182.55	6331.5	3328.69	3235.06	3032.87	1908.53	6356.59	6049.8	3712.98	2368.22	6214.8	1893.72	4752.77	5207.95	6057.89	4931.71
HMDB01539	30214.2	14179.8	17080.8	19642.5	15192.6	17979.2	18147.9	20470.1	12435.1	6742.75	16288.8	18950.8	10629.2	27250.9	20237.1	7462.91	19155.5	10168.1	28356.1	29674.4	32091.6	13799.6	27024.3	29386	4167	18942.8	14969.4	10155.7	8106.05	19702.3	13964.9	27893.4	18223.6	14905.6	16814.2	21293.6	15614.2	19118	31323	13961.9	19832.7	26117.5	18539.8	28542.4	13424.5	15011.4	25573.8	34449.6	13702.9
HMDB01548	719181	651323	915991	676254	625242	901361	825047	704170	743774	750840	1.40911e+06	1.10596e+06	1.12708e+06	1.13805e+06	930505	1.23246e+06	1.21831e+06	1.07931e+06	1.05829e+06	1.07192e+06	703897	789074	676461	606415	738626	803415	686249	753650	792215	854358	16584.6	18932.4	20250.4	20536.9	14651.4	29577.3	19894.1	15150	15013.7	16856.2	19120	17229.9	35737.9	24702	16072.9	51440.7	19114	24419.6	23735.7
HMDB01553	14080.8	17180.5	4703.38	7773.31	19710.9	19087.5	20001	25644	2061.24	14821.9	18727.5	NA	15374.8	12559.8	7443.87	14146.4	16089.3	16946.8	19868.1	20117.6	5389.91	13864.1	5434.16	13647	7519.16	10898.8	21059.1	15439.2	19949.2	13068.4	7578.12	8124.53	5730.76	5617.06	18036.8	12464.8	8161.77	5912.91	11411.8	10202	6843.68	4872.57	9943.25	3846.94	2846.3	5374.21	4062.98	3115.95	3174.04
HMDB01565	2.94641e+06	2.27426e+06	2.19851e+06	2.08381e+06	1.81793e+06	2.22554e+06	1.82345e+06	1.22121e+06	1.79421e+06	1.79293e+06	2.55368e+06	2.66413e+06	3.29572e+06	4.34761e+06	3.52607e+06	2.86883e+06	2.98441e+06	2.75428e+06	3.82145e+06	2.74307e+06	2.76757e+06	1013.43	2.9178e+06	2.47542e+06	3.02145e+06	2.5009e+06	2.92935e+06	2.54589e+06	3.91009e+06	3.15958e+06	6.47878e+06	6.34782e+06	7.00522e+06	7.25923e+06	6.3748e+06	8.14824e+06	7.03618e+06	6.94157e+06	6.98857e+06	6.85521e+06	5.59235e+06	6.26022e+06	5.56895e+06	5.87248e+06	6.56722e+06	6.66192e+06	5.61395e+06	6.17995e+06	6.62449e+06
HMDB01586	103152	57949.5	53147.1	56207	62136.5	36042.3	96800.3	130129	138144	122938	52166.5	45672.9	47289	7667.54	67186.7	34098.1	42835.3	45829.9	24678.4	53117	29329.1	13666.8	34077.1	27601.2	16930.1	22470.8	25752.2	38528.6	16493.9	38592.6	NA	NA	NA	3234.14	NA	NA	1541.7	NA	NA	NA	NA	NA	NA	1532.84	1152.77	NA	NA	NA	NA
HMDB01864	39676.7	54610	42438.2	31544.5	49958.5	48967.8	31070.1	60407.8	44763.4	64701	59712.3	38928.7	41603.8	33810.4	34614.3	23993.7	41002.5	29411.7	33314.8	36910.3	34115.4	38084.7	46927.8	46080	60902	36706.1	43804.8	35201.1	52632.8	46910.8	30111.4	38164.1	35922.5	38828.1	21568.2	31965.6	40261.9	35545	36881.5	36247.9	34284.5	50694.5	31164.7	44324.3	36703.2	37662.2	43120.1	30686.1	36713.3
HMDB02005	8621.22	3193.09	NA	3585.33	4618.61	3068.33	4039.42	NA	2640.81	NA	3008.25	1601.69	1992.98	4085.93	2917.73	2518.44	3017.16	NA	4863.45	3873.24	2084.5	2039.46	2839.74	6166.1	2309.88	NA	2068.78	2334.4	2721.37	1472.52	2583.1	5998.91	12013.3	9887.08	4890.59	3254.51	7092.78	3990.69	6585.53	4842.86	2823.04	3921.43	3642.29	4086.64	2544.91	1939.05	1982	2125.93	NA
HMDB02064	2662.57	NA	1216.3	4217.44	NA	9115.05	6568.38	NA	8415.73	3038.93	4916.87	4533.7	1791.82	1182.29	NA	1665.55	7493.43	2125.52	NA	3927.24	NA	2765.7	1784.74	1144.38	NA	2121.94	3115.65	NA	1254.51	3061.43	3132.14	1438.65	7126.27	3184.71	NA	5773.69	8578.27	2692.64	6234.09	4888.07	12022.7	3844.59	NA	7557.13	4028.95	11367.2	3718.97	2904.95	6123.09
HMDB02108	9518.83	4096.78	9910.11	5780.05	12295.2	13616.9	16790.1	7732.91	12636.5	13110.1	7641.98	8023.81	13777.2	10243.8	8582.31	10222.1	10088.5	11445.2	14176.6	8215	13383.6	10088.4	8691.35	8385.45	11879.3	10122.8	8978.27	16446.6	12145	12499.2	44971.7	50785.8	51191.5	46448.3	59969	51220.6	55297.2	44307.9	57113	59905.2	47753.7	47762.4	44700.3	57246.5	51876.7	54189.7	42120.5	41624.4	39017.8
HMDB02189	2943.37	NA	NA	NA	NA	NA	NA	NA	NA	2063.79	NA	NA	NA	NA	NA	NA	NA	NA	NA	NA	NA	NA	2622.01	NA	NA	NA	NA	NA	NA	NA	12109.6	11943.1	15732.7	13990.5	4973.74	11924.4	8734.62	18863.3	9906.56	9769.63	10925.2	29926.9	24473.9	12378.2	17795.8	15579.6	16289.3	11447.3	10547.4
HMDB02205	8890.43	7425.36	5653.43	6146.92	9235.28	2614	10378.5	6463.33	6715.15	1987.96	1300.03	6146.91	6621.29	1400.05	4360.08	7144.1	4108.36	5384.06	3017.05	6823.42	5237.18	2971.83	4474.87	3709.92	3568.2	2631.86	6366.63	7320.64	12057.9	9015.12	1457.26	NA	NA	1384.49	5063.26	1524.95	1756.28	NA	1559.56	906.435	NA	NA	2185.01	NA	NA	NA	NA	4768.66	1190.11
HMDB02222	42026.2	54541.3	23227.6	40303.5	30234	46413.7	38648	63275.8	67914.6	66407.1	33578.8	19290.1	18914.7	20427.5	19176.6	11072.4	21395.3	17725	18527.5	31835.6	16429.9	17229.8	29670.6	14090.2	17670.4	12407.5	11510.8	37322.2	18227.1	13195.8	NA	NA	3725.57	1520.67	NA	1566.9	2571.05	3642.79	NA	NA	4496.01	5149.31	3232.61	3307.97	1719.26	2424.58	NA	2666.72	2528.73
HMDB02359	2.0538e+06	1.90019e+06	1.80367e+06	2.04037e+06	2.02263e+06	1.63801e+06	2.06699e+06	1.56307e+06	2.1945e+06	2.21204e+06	1.96e+06	1.67431e+06	2.20402e+06	2.26717e+06	2.35456e+06	1.71493e+06	1.8289e+06	1.80837e+06	2.3897e+06	1.96788e+06	1.61105e+06	1.58037e+06	2.05361e+06	2.06494e+06	1.57213e+06	1.89565e+06	1.6845e+06	1.43111e+06	1.57658e+06	1.34018e+06	953808	942353	808020	861004	799198	921768	765871	790504	877486	904587	816859	852297	738849	946204	919524	802917	749334	825675	973672
HMDB03070	10825.2	NA	5653.15	NA	1737.47	6140.57	9419.68	10243	NA	13805.2	NA	1561.02	NA	NA	22803.6	1772.37	1021.52	3031.6	9730.39	18082.5	2500.17	NA	8543.12	NA	7109.84	2243.74	1433.35	10743.7	NA	955.345	1937.47	8399.04	3493.68	12168.4	11942.1	7076.96	5705.13	17399	4158.8	6209.89	6654.73	7651.73	5570.72	5449.34	7578.69	8957.65	5028.52	25856.6	4252.21
HMDB03075	NA	NA	NA	NA	NA	NA	NA	NA	NA	NA	NA	NA	2815.91	2663.34	NA	NA	1667.27	NA	NA	1515.41	NA	NA	1839.52	NA	NA	NA	NA	2440.85	NA	NA	6681.79	2032.44	2465.81	2421.54	3680.66	7540.96	4740.5	3184.8	2927.27	3465.76	2565.69	2694.41	NA	2395.06	3058.07	6419.8	4412.71	2651.09	2250.63
HMDB03152	69808	39042.3	75258.6	52566.8	48709.7	68675.5	70920.8	38450.7	68888.4	44274.1	140975	101908	106405	124615	69616.1	147727	156285	119063	131260	102678	63897.8	66472.9	71448.8	54358.7	71293.6	66377.9	63051.7	76964.6	82868.8	108457	531046	493181	334611	543202	550079	705369	584234	463940	470691	270004	427606	365799	492764	221630	361480	503257	368523	527960	369318
HMDB03320	122987	157907	122538	131364	111890	112834	130034	118697	104001	85298.7	109874	131763	108484	114230	81260.1	87217.7	117098	112012	100888	106251	66452	43529.6	75662.4	39515.2	45273.5	33698.9	70075.5	58512.8	71906.7	56761.2	22076.5	25393.2	32486.1	37207.5	36839.8	26584.6	34363.2	35080.6	39992.6	42420.4	37246.3	37339.7	25982.2	37056.2	14971.5	21715.7	24951.8	39852.7	25344.7
HMDB03335	31409.9	19024.8	23638.4	24794.9	32619.5	29386.2	30664.4	23167.6	36207.3	37886.4	35026.3	27189.5	26902.5	29134.4	29093.2	40319.6	32830.8	33624.7	35889	29437.6	21011.2	27300.3	39781.5	31124.1	20262.7	25012.4	37231.3	30845	35959.4	27671.7	913908	858245	762204	575600	644690	796915	612728	574600	519983	741350	526955	583384	673968	581328	723196	670997	671063	506395	669960
HMDB03337	3.31298e+06	3.27759e+06	2.84222e+06	2.62058e+06	3.3914e+06	3.07281e+06	3.25343e+06	2.74298e+06	3.02815e+06	3.53661e+06	4.17423e+06	3.22232e+06	3.61991e+06	3.46461e+06	3.6379e+06	3.82169e+06	3.77206e+06	3.5035e+06	3.55123e+06	3.87157e+06	4.05237e+06	3.36714e+06	3.4475e+06	3.51188e+06	3.69947e+06	3.14643e+06	3.6248e+06	3.58435e+06	3.80513e+06	3.85335e+06	2.93862e+06	2.67222e+06	2.7296e+06	3.03437e+06	2.50946e+06	1.9772e+06	2.80182e+06	2.98706e+06	2.64063e+06	2.94346e+06	2.01691e+06	1.83994e+06	1.70461e+06	1.75656e+06	1.31557e+06	1.55215e+06	1.5871e+06	1.71681e+06	2.38254e+06
HMDB03339	1.0411e+07	1.34192e+07	1.18665e+07	1.24015e+07	1.22512e+07	1.08755e+07	1.00231e+07	1.22732e+07	1.15788e+07	1.25951e+07	1.02468e+07	8.21333e+06	1.00668e+07	7.81531e+06	9.34756e+06	7.93614e+06	9.02177e+06	8.49153e+06	7.63747e+06	7.62673e+06	1.09122e+07	1.03128e+07	9.54686e+06	1.0769e+07	9.46957e+06	1.18565e+07	1.15476e+07	1.08961e+07	1.03339e+07	1.05405e+07	2.31337e+07	1.95435e+07	2.10121e+07	2.12817e+07	2.22857e+07	1.89181e+07	2.05848e+07	2.16892e+07	2.27174e+07	2.0858e+07	1.77009e+07	1.78969e+07	1.54464e+07	1.88496e+07	1.80432e+07	1.78462e+07	1.74382e+07	1.8382e+07	1.74194e+07
HMDB03357	NA	NA	NA	2613.58	NA	5507.29	4623.79	4694.01	NA	NA	NA	NA	NA	NA	NA	NA	1868.36	1083.17	1114.49	NA	NA	NA	NA	NA	NA	NA	NA	NA	NA	NA	10551.4	7331.85	13407.7	3985.23	9146.01	18563.2	12905.9	9608.82	10124.3	6561.14	21000.9	8717.68	3875.76	9705.46	5175.17	23300.4	9997.17	12812.4	5406.73
HMDB03431	NA	NA	NA	2682.19	NA	NA	2692.95	NA	NA	NA	3252.95	NA	2609.47	4085.08	3829.96	2028.2	3016.44	1744.04	1621.05	3081.63	NA	NA	NA	1151.29	NA	NA	NA	NA	NA	NA	2397.57	3126.84	1564.77	NA	2168.25	1943.28	2161.41	2040.29	2599.14	3176.67	3032.83	4125.74	5575.17	3308.87	3094.27	NA	1615.08	3586.13	2687.19
HMDB06029	22126.9	22282.2	13739.2	20357.2	20895.3	10211.2	13299.8	19192.7	19981.2	22200.4	16252	16130.5	20975.3	23296.5	35069.8	16160.7	21575.8	18848.2	31754.5	28427.9	14423.4	12562.7	22586.7	34056.6	20926.7	16929.9	19233.6	10179.6	13401.2	10064.9	41466.4	45980.8	27915.9	23369.4	22130.1	33889.7	27033.7	30251.6	47593.9	66638.5	27986.1	28656.6	22986.5	42986.7	34158.9	18659.5	23358.2	26588.5	42873.2
HMDB06557	6118.67	4623.06	6424.52	3287.65	NA	NA	6396.96	NA	3015.27	3452.09	3503.89	1868.39	5018.53	8348.73	7114.84	7354.32	17210.3	10887.3	5766.36	3660.67	3126.98	1019.97	1966.56	4046.9	3021.19	NA	NA	2567.62	3570.76	5534.01	4356.48	3749.25	1393.96	3042.48	3799.82	3607.63	4624.63	3834.46	2078.89	3056.82	NA	1447.97	2142.17	2140.78	2141.47	2284.88	2155.17	1964	2041.28
HMDB32208	31853.1	6137.09	18158.1	20682.3	46564.5	45248.9	31344.8	12379.7	16069.9	16145.7	62485.7	43568	35388	46838.4	22335.1	22798.2	54290	30270.5	44110.7	26946.4	36665.3	23846.8	20953.8	24394.2	33751.3	14974.5	24739.9	25050.6	20185	25804.9	18220	14791	15996.2	19432.2	13690.6	12676.4	18094.1	17109.4	12151.7	15326	25158	15755.4	38827.8	19892.6	12192.2	24987.1	17582.9	23064.9	16522.1
HMDB60274	255669	267939	176049	180991	194895	162373	224426	160243	319193	308920	225019	167621	202864	169368	212860	199538	174177	213637	219091	245337	129614	169975	128092	128461	154565	101097	163419	141943	158147	156228	2258.62	1637.33	2087.44	NA	2713.6	2635.17	1585.05	2368.12	4296.42	2271.94	4622.57	NA	4714.51	3136.68	1653.36	2300.58	NA	2781.24	4932.01
a Human Metabolome Database
b not available
[truncated: 11 more columns]
