# Supplementary material
Source: publisher figshare collection journal article supplement (https://karger.figshare.com/articles/dataset/_/4004913)
Supplement: Supplementary file 1 [file 1 › suppl.table.4.MNP_201511004_1_12.xlsx]

## Sheet: tab.MSEA_result
Supplemental Table S4. Metabolic pathways enriched by Metabolite Set Enrichment Analysis (MESA) in different brain regions
SMPDBa ID	Pathway	ACC		BLA		CA1		CeA		NAc		PrL
		MSEA P-value	Direction S-NS	MSEA P-value	Direction S-NS	MSEA P-value	Direction S-NS	MSEA P-value	Direction S-NS	MSEA P-value	Direction S-NS	MSEA P-value	Direction S-NS
SMP00004	Glycine and Serine Metabolism	0.0964399	+	0.10364	-	0.775685	+	0.493427	-	0.069416	-	0.245546	+
SMP00005	Pterine Biosynthesis	0.190675	+	0.141401	+	0.5757	+	0.0397061	+	0.205968	-	0.143816	+
SMP00006	Tyrosine Metabolism	0.111414	+	0.314711	+	0.39626	-	0.236572	+	0.356525	-	0.426609	+
SMP00007	Beta-Alanine Metabolism	0.196566	+	0.255805	-	0.314803	-	0.0109619	+	0.0601472	+	0.0263259	+
SMP00008	Phenylalanine and Tyrosine Metabolism	0.290415	+	0.619316	-	0.259262	-	0.323859	+	0.0744398	-	0.546179	+
SMP00009	Ammonia Recycling	0.235914	+	0.271468	-	0.10539	+	0.485776	+	0.220806	-	0.484745	+
SMP00010	Nucleotide Sugars Metabolism	0.233825	+	0.421863	+	0.321884	+	0.234567	+	0.144017	+	0.506035	-
SMP00011	Inositol Metabolism	0.383289	-	0.438891	-	0.355051	-	0.529595	+	0.237737	+	0.551214	-
SMP00012	Catecholamine Biosynthesis	0.422289	-	0.275769	+	0.242886	+	0.421423	+	0.0596517	+	0.0673568	+
SMP00013	Cysteine Metabolism	0.314729	+	0.631543	-	0.141531	+	0.234567	+	0.14629	-	0.109391	+
SMP00015	Glutathione Metabolism	0.249214	+	0.542915	-	0.287015	-	0.0797313	+	0.234567	+	0.548876	+
SMP00016	Propanoate Metabolism	0.320216	+	0.603139	-	0.308439	+	0.327189	+	0.052537	+	0.527515	+
SMP00017	Vitamin B6 Metabolism	NAb	NA	NA	NA	NA	NA	NA	NA	NA	NA	NA	NA
SMP00018	Alpha Linolenic Acid and Linoleic Acid Metabolism	NA	NA	NA	NA	NA	NA	NA	NA	NA	NA	NA	NA
SMP00020	Arginine and Proline Metabolism	0.0137349	+	0.142943	-	0.469869	-	0.442888	+	0.0976902	-	0.580211	+
SMP00021	Taurine and Hypotaurine Metabolism	NA	NA	NA	NA	NA	NA	NA	NA	NA	NA	NA	NA
SMP00023	Steroid Biosynthesis	0.201034	+	0.244573	-	0.286361	-	0.000990841	+	0.237737	+	0.564337	-
SMP00024	Porphyrin Metabolism	0.00605726	+	0.0175263	+	0.27515	-	0.0397061	+	0.316164	+	0.139574	+
SMP00025	Phospholipid Biosynthesis	0.0018428	+	0.320711	+	0.0672996	+	0.639542	+	0.0462659	+	0.0123661	+
SMP00027	Pantothenate and CoA Biosynthesis	0.163547	-	0.0146003	-	0.375974	+	0.181684	+	0.144303	+	0.331614	-
SMP00028	Caffeine Metabolism	0.190675	+	0.266056	+	0.444447	+	0.0823807	+	0.119231	+	0.286467	+
SMP00029	Selenoamino Acid Metabolism	0.273527	-	0.252683	-	0.287828	-	0.638713	+	0.221795	-	0.123639	-
SMP00030	Oxidation of Branched Chain Fatty Acids	0.233825	-	0.016282	-	0.0790094	+	0.307616	+	0.111557	+	0.409326	+
SMP00031	Pentose Phosphate Pathway	0.230883	+	0.275621	-	0.399656	-	0.0766156	+	0.472105	-	0.172229	-
SMP00032	Valine, Leucine and Isoleucine Degradation	0.406957	+	0.225353	+	0.213838	+	0.254925	-	0.0472183	+	0.394809	-
SMP00033	Methionine Metabolism	0.626297	+	0.271863	-	0.235495	-	0.625858	+	0.117558	-	0.553656	+
SMP00034	Sphingolipid Metabolism	0.164459	+	0.329947	-	0.124707	+	0.0570297	+	0.232949	+	0.404543	-
SMP00035	Bile Acid Biosynthesis	0.086706	+	0.543567	-	0.443879	+	0.0101434	+	0.111557	+	0.367875	+
SMP00036	D-Arginine and D-Ornithine Metabolism	NA	NA	NA	NA	NA	NA	NA	NA	NA	NA	NA	NA
SMP00037	Lysine Degradation	0.00482957	+	0.105351	+	0.319587	-	0.131108	+	0.0239043	+	0.0294558	+
SMP00039	Glycerolipid Metabolism	0.00647883	+	0.494683	+	0.453148	-	0.000904512	+	0.121043	-	0.185575	+
SMP00040	Glycolysis	0.0253312	+	0.190624	+	0.22085	+	0.216212	+	0.370981	+	0.452113	+
SMP00041	Sulfate/Sulfite Metabolism	NA	NA	NA	NA	NA	NA	NA	NA	NA	NA	NA	NA
SMP00043	Galactose Metabolism	0.0546931	+	0.405914	+	0.176404	+	0.323859	+	0.141204	+	0.3514	-
SMP00044	Histidine Metabolism	0.0202592	+	0.327186	-	0.391532	-	0.0306313	+	0.052537	+	0.137258	+
SMP00045	Amino Sugar Metabolism	0.196566	+	0.597159	-	0.278533	+	0.019543	+	0.221444	-	0.368602	-
SMP00046	Pyrimidine Metabolism	0.0780542	+	0.594876	+	0.677026	-	0.00577554	+	0.226167	-	0.634099	+
SMP00048	Nicotinate and Nicotinamide Metabolism	0.17069	+	0.171028	+	0.312075	+	0.204896	+	0.265502	+	0.162884	+
SMP00050	Purine Metabolism	0.364377	+	0.247233	-	0.238702	-	0.00998554	+	0.230126	+	0.223226	-
SMP00051	Fatty acid Metabolism	0.086706	+	0.543567	-	0.375974	+	0.10626	+	0.111557	+	0.604287	+
SMP00052	Beta Oxidation of Very Long Chain Fatty Acids	0.252889	-	0.0240154	-	0.0894917	+	0.50357	+	0.158545	+	0.368292	-
SMP00053	Folate Metabolism	0.0799746	+	0.452076	+	0.286361	-	0.0183173	+	0.106263	+	0.146272	+
SMP00054	Fatty Acid Elongation In Mitochondria	0.190675	+	0.266056	+	0.444447	+	0.0823807	+	0.119231	+	0.296303	+
SMP00055	Alanine Metabolism	0.429112	-	0.12832	-	0.630575	-	0.517316	-	0.0441658	-	0.124429	-
SMP00057	Citric Acid Cycle	0.272739	-	0.487191	+	0.283552	+	0.314932	+	0.0773209	-	0.326403	-
SMP00058	Starch and Sucrose Metabolism	0.0281551	+	0.249275	+	0.216679	+	0.100029	+	0.357835	+	0.447609	-
SMP00059	Urea Cycle	0.119681	+	0.325453	-	0.314378	-	0.291417	-	0.0277913	-	0.491464	-
SMP00060	Pyruvate Metabolism	0.53483	-	0.378993	+	0.484981	-	0.096047	+	0.404989	-	0.278763	-
SMP00063	Tryptophan Metabolism	0.174967	+	0.365774	-	0.226631	+	0.114031	+	0.085058	-	0.426609	+
SMP00064	Fructose and Mannose Degradation	0.0187719	+	0.310262	-	0.472934	+	0.0229319	+	0.310629	+	0.273581	+
SMP00065	Ubiquinone Biosynthesis	0.0349063	+	0.452076	+	0.297779	-	0.361455	+	0.237737	+	0.220697	+
SMP00066	Biotin Metabolism	0.528537	-	0.204615	-	0.500427	+	0.0832333	+	0.309284	+	0.326528	-
SMP00067	Aspartate Metabolism	0.0528551	+	0.014097	-	0.102407	-	0.584605	+	0.0781031	-	0.40427	+
SMP00068	Androgen and Estrogen Metabolism	0.00605726	+	0.0930728	+	0.286361	-	0.0397061	+	0.316164	+	0.146272	+
SMP00070	Riboflavin Metabolism	0.579938	+	0.0880038	-	0.222658	-	0.126474	+	0.237737	+	0.459393	+
SMP00071	Ketone Body Metabolism	0.201034	+	0.195249	+	0.0714948	+	0.223329	-	0.269992	+	0.614073	+
SMP00072	Glutamate Metabolism	0.164776	+	0.251771	-	0.239228	+	0.270024	+	0.143182	+	0.377964	-
SMP00073	Butyrate Metabolism	0.0654105	+	0.424253	+	0.261111	+	0.256742	+	0.107848	+	0.571047	-
SMP00074	Retinol Metabolism	0.0799746	+	0.336661	-	0.392502	+	0.0982688	+	0.0760503	+	0.15316	+
SMP00075	Arachidonic Acid Metabolism	0.508986	+	0.128231	-	0.327374	-	0.0743066	+	0.07827	+	0.38688	+
SMP00076	Thiamine Metabolism	0.228733	-	0.224298	-	0.172929	-	0.567232	-	0.194358	-	0.10528	-
SMP00123	Betaine Metabolism	0.2945	+	0.192665	-	0.476742	+	0.11695	+	0.288595	-	0.425051	+
SMP00124	Glycerol Phosphate Shuttle	0.000653857	+	0.00649266	+	0.452699	-	0.0372423	+	0.0293025	+	0.00416106	+
SMP00126	Phenylacetate Metabolism	0.201034	+	0.0880038	-	0.234663	+	0.223329	+	0.219542	-	0.295479	-
SMP00127	Glucose-Alanine Cycle	0.0799746	+	0.621644	+	0.0714948	+	0.164904	-	0.0954256	-	0.0306984	+
SMP00128	Gluconeogenesis	0.0822447	+	0.415343	+	0.20032	+	0.372419	+	0.301881	-	0.251902	-
SMP00129	Malate-Aspartate Shuttle	0.209619	+	0.275873	-	0.586371	-	0.121421	-	0.0614577	-	0.219397	-
SMP00130	Steroidogenesis	0.0364364	+	0.224298	+	0.589765	-	0.0823807	+	0.199435	+	0.0675958	+
SMP00355	Mitochondrial Electron Transport Chain	0.0273037	+	0.0153702	+	0.337884	-	0.02076	+	0.0970558	+	0.103382	+
SMP00444	Lactose Synthesis	0.311799	+	0.388795	-	0.0175967	+	0.085938	+	0.167427	-	0.174289	-
SMP00445	Spermidine and Spermine Biosynthesis	0.603118	-	0.391058	-	0.339074	-	0.209849	+	0.0649578	-	0.30685	-
SMP00449	Ethanol Degradation	0.11499	+	0.229541	-	0.483054	+	0.0903465	+	0.144017	+	0.576966	+
SMP00450	Phytanic Acid Peroxisomal Oxidation	0.086706	+	0.157527	-	0.0790094	+	0.113402	+	0.111557	+	0.179038	+
SMP00452	Threonine and 2-Oxobutanoate Degradation	0.329521	+	0.388167	+	0.391513	+	0.642787	-	0.0310422	+	0.179038	-
SMP00455	Homocysteine Degradation	0.462	-	0.151771	-	0.326528	+	0.00374093	-	0.678564	-	0.420557	-
SMP00456	Fatty Acid Biosynthesis	0.192954	-	0.343037	+	0.0146487	+	0.0585328	-	0.131181	+	0.0395513	-
SMP00457	Lactose Degradation	NA	NA	NA	NA	NA	NA	NA	NA	NA	NA	NA	NA
SMP00459	Pyruvaldehyde Degradation	0.342697	-	0.174103	+	0.344036	-	0.372047	+	0.603475	+	0.115619	+
SMP00462	Inositol Phosphate Metabolism	0.343819	-	0.691829	+	0.0982191	-	0.636036	-	0.158545	+	0.378958	-
SMP00463	Phosphatidylinositol Phosphate Metabolism	0.401382	-	0.221894	-	0.172929	-	0.516633	-	0.242244	+	0.308309	-
SMP00464	Vitamin K Metabolism	0.0110636	+	0.224298	+	0.0776703	-	0.0668292	+	0.110034	+	0.0675958	+
SMP00465	Carnitine Synthesis	0.0046891	+	0.157527	-	0.513193	-	0.0793862	+	0.0273634	+	0.0125069	+
SMP00466	Transfer of Acetyl Groups into Mitochondria	0.511869	+	0.480012	-	0.346439	+	0.564472	+	0.368303	-	0.368602	-
SMP00467	Trehalose Degradation	NA	NA	NA	NA	NA	NA	NA	NA	NA	NA	NA	NA
SMP00468	Degradation of Superoxides	NA	NA	NA	NA	NA	NA	NA	NA	NA	NA	NA	NA
SMP00478	Nucleotide Excision Repair	NA	NA	NA	NA	NA	NA	NA	NA	NA	NA	NA	NA
SMP00479	Plasmalogen Synthesis	0.234238	+	0.463161	+	0.544332	+	0.0633189	+	0.103084	+	0.248466	-
SMP00480	Mitochondrial Beta-Oxidation of Short Chain Saturated Fatty Acids	0.11499	+	0.591784	-	0.483054	+	0.0903465	+	0.144017	+	0.560602	+
SMP00481	Mitochondrial Beta-Oxidation of Medium Chain Saturated Fatty Acids	0.11499	+	0.591784	-	0.483054	+	0.0903465	+	0.144017	+	0.560602	+
SMP00482	Mitochondrial Beta-Oxidation of Long Chain Saturated Fatty Acids	0.086706	+	0.543567	-	0.375974	+	0.10626	+	0.111557	+	0.604287	+
SMP00654	Warburg Effect	0.421143	+	0.263387	+	0.122243	-	0.0330824	+	0.397026	-	0.400167	+
SMP00716	Thyroid hormone synthesis	0.258372	+	0.431189	-	0.515527	+	0.208839	+	0.160452	+	0.105652	+
a The Small Molecule Database
b not available
